# Supplementary material for: Hijacking of transcriptional condensates by endogenous retroviruses
Source: Research Square preprint supplement (doi:10.21203/rs.3.rs-802409/v1), 2021-09-15
Supplement: Supplementary file 7 [file 17c0a5e8a0124d9a0717b767.xlsx]

## Sheet: RNA FISH probes
Table S1A. Sequence of RNA FISH probes
	Mir290-295			IAPez			Cthrc1
1	gctagcctgccttttaaaaa		1	taacagtctgctttacggga		1	cgtagcggttcaagactctg
2	gagcgaggaaggctgagttc		2	tccttagaaagttcaaggcc		2	atgtggtgacctctcatgat
3	aatgtcttctttggagacca		3	agattgccctgaatttcatc		3	acttacacggatttgggcat
4	actctttttccacacacatt		4	cttggaaaggcctgtatact		4	tggagccagaaattactggg
5	ttcctcccttgaaattatgt		5	atctagtgacgagtatctcc		5	ctcgggctttcttttgaaat
6	tactcactttccccacatag		6	ctgtttcctcagaggagaat		6	ctcacaaaggacacgttgca
7	taactcctagctttggtttc		7	ttttggcttttttcttgacc		7	aacaaatgctttgtgggggt
8	aatgtactgcatagactccc		8	tatatttgcccatactaggg		8	cccagggagatgacacaaag
9	cttaaaattcactccaacct		9	gtagtttgtctgatcagcag		9	tgtggtcctctaaggagtaa
10	ccaggaggaaagaacgtgga		10	cttgtaagcctttgttcttt		10	ttcagcttcaaagcctctga
11	gcggtccagacgttaaaaca		11	cttgccacacttagagcaaa		11	agatcaggcaaaatgggtcc
12	gctggtaaatgtgccagata		12	ggaagaattctgccctttat		12	ctgactgctcatctgtttta
13	cagttaacccggaacacgtg		13	taataggaagtcggaggcgg		13	agtgttcctgactggttaag
14	tttcttcgaatccgtactca		14	ctatcctatctcctttacta		14	gaaagcccttgggatatttg
15	tcgctatactcagtctcatt		15	gtattatcagggaggagcag		15	cagactttcccacagattag
16	tacaacgaccacctcagtta		16	tatctcaggtcctgcaaatt		16	ctccactaggtttattgact
17	taacagctccaagcagcgac		17	actcttttccgttgatctta		17	gtgggacagacaaactctct
18	gcgtcagatgcaaagctatg		18	tatacttttatctgctccgg		18	caaatctatcgatggctggc
19	taaactccaagcctaaaccc		19	atgagatgactctgtggtgg		19	cagaagtttatgatgtgcca
20	aactgaaccgccctctttag		20	gcccaaatgctgcataatat		20	agtgcctgacaaccatatag
21	acgactgccttacatccatc		21	gggcgttttcattggacaaa		21	aactagctgtcaaggagctt
22	caatctacaatgcacctgga		22	taattgttcctctaccagtt		22	ccagtgcttttgaatcagtt
23	ttagttcttagccgttttga		23	gagtattccaaggtgaggta		23	tgcgtgaaacagcagggatt
24	agaaatgcaaccccagtgaa		24	cccttggacacaaaggtata		24	gtataatccttagaggggga
25	gactcaaacccacatgtgac		25	tggtaagaccttccattgat		25	cacagtatgcttttccaagt
26	aacgcggaaagcctttagta		26	ctttatggcacaggaggatg		26	cctaatgactgtgtggactt
27	tccaacttccaagacctgag		27	actttttctgtggctatctg		27	gcgtgaaagacacgctttga
28	aggtaagcgattccaggttg		28	gatctcttcttatctctacc		28	gctagttccaataggtattt
29	agcacacatacctgtttcaa		29	ccttaactcagcggaaggaa		29	cctctcaggaaagatgctac
30	tagccagtggcaacgaattc		30	ggggaggagatatgaggatc		30	ttgcttatcaattcctgcac
31	taatatggcggccacgtgag		31	attctgtaaggctttttcca		31	gcattcttgccatgaagtta
32	gcaactacagtagtcaagca		32	ttttagctggggatacgttt		32	cctcagcaggtgtgtaataa
33	ccaactacagtagtcaagca		33	taagggcaagctgtgcaatt		33	ccagttagtttcacgtgatc
34	ttaaagtcagctacagccag		34	tgtttggataccactttacc		34	cccatttttatgcagaggaa
35	aagcttgtttgtgctaggag		35	taacaatgtcacgggcttct		35	ctaagttgtatgtgcacctc
36	ttatgggtattatctacccg		36	agaactcacagcagctttga		36	agtagctgtcttgtatcaca
37	ctgggctattgtaaagccaa		37	aataccgcgtgggttaattc		37	ggacttggttcttggaactt
38	agattatgcttagggcacac		38	tttctccggttaacggagaa		38	cctgacattctatgttagct
39	gctaggcaggattacattca		39	ctggctctgaacaatgacgt		39	ggcgaactcattttaagggt
40	ttgaaggcaagtaagtaccc		40	aaggctgtctgaatcaaggc		40	gtccgtgttctaatggatta
41	ccacagatgacacccaaatg		41	tgttaatggtgtcagtcgtc		41	gtcaaatgatcacagctgcg
42	cacctcagcttttacttttg		42	atcttgacattagctgaggc		42	ggggacagtaccattactta
43	ctgtcaaatctgggtcactt		43	tgacaaattagctgccctag		43	ccagtcacgtggtaattttt
44	gccaaaaggataaatgcagc		44	aattcagccgtccaattttg		44	ggcgaccaaggacaaaagga
45	ttcgctagatccaaacatgc		45	ctgaagtctcaattcccgaa		45	ccctaatttcagcagtttta
46	gttgattgaagttccgatgc		46	agatccaattgggtaatcct		46	cagaatcaccatcgtcacta
47	gatgagcaagcaaggagtct		47	aatgagactagcctcgtgag		47	ctgacatgctattttgcgtg
48	aaagcagccgacctgtgaat		48	tgtaggtaaaggagccgtac		48	tccctggatcattcatcaaa

## Sheet: Primers
Table S1B. Primers used in this study
FKBP knock-in at Trim28 N-terminus
Name	Oligo sequence (5'-3')
Guide RNA	CGTGTGAATGGCGGCCTCGG
5’ homology arm cloning forward	CCAAGCTTGCATGCCTGCAGGTCGACTCTAGAGGATCCCCCCGAGTTTAACAATAAGAAAGTTTGGG
5’ homology arm cloning reverse	TCTTCGCCCTTAGACACCATGGCCGCCATTCACACG
3’ homology arm cloning forward	GGTCGGGTGGCGGCGGATCTGCCTCGGCGGCAGC
3’ homology arm cloning reverse	CGTTGTAAAACGACGGCCAGTGAATTCGAGCTCGGTACCCTCCCAGACACTGAGACC
mRuby2 forward	GCGGCGTGTGAATGGCGGCCATGGTGTCTAAGGGCGAAG
mRuby2 reverse	AAGTTAGTAGCTCCGCTTCCCTTGTACAGCTCGTCCATCCC
P2A FKBP forward	GGATGGACGAGCTGTACAAGGGAAGCGGAGCTACTAACTTCAG
P2A FKBP reverse	GCAGTCGCTGCCGCCGAGGCAGATCCGCCGCCACC
Genotyping primer forward 1	CATCTCGACAGCGCCTGG
Genotyping primer forward 2	ACAAAGGCCACACCCGGG
Genotyping primer reverse	GTAGCAGATGCCCTACACAC
qRT-PCR
Name	Oligo sequence (5'-3')
pri-miR290-295 transcript	TTTCAAGGGAGGAACGAGCC
	TAGACTCCCTAGACCTGCCC
miR290-295 super-enhancer	GAGTCGAAGGCAGGAGGATG
	CTCCGAGTAGAGGCTGTCC
Klf4 transcript	CGGGAAGGGAGAAGACACT
	GAGTTCCTCACGCCAACG
Klf4 super-enhancer	TCGTTATGGGAGAAGGAGCC
	CAGATGCCTTCCACTTGCTG
Fgf4 transcript	GCAAGCTCTTCGGTGTGC
	CGTAGGATTCGTAGGCGTTG
Fgf4 super-enhancer	GGTTATTCAGGGCTGGGGAT
	GGTTCTCCATGTCCCAGTCT
Oct4 transcript	TCTTTCCACCAGGCCCCCGGCTC
	TGCGGGCGGACATGGGGAGATCC
Oct4 super-enhancer	ATTGGGAGGTGAGCATGACA
	AGTCCCCTCCTTCTACCACA
MycN transcript	AGCACCTCCGGAGAGGATAC
	CCACATCGATTTCCTCCTCT
MycN super-enhancer	CAACCGTTTCTTTTGGCAGC
	CACACATGTCTTTGCCTCCA
IAPez	TCTTTTAGAAGTGGCTGGAGTGA
	TGCTGAAAAATATTGGCAACTC
Beta-actin	AAGGCCAACCGTGAAAAGAT
	GTGGTACGACCAGAGGCATAC
Cthrc1 nascent transcript	ACACTAGCGCTTACAGATGGT
	GTGGCCCAGTTAGTTTCACG
Cthrc1 transcript	GACCTCTTCCCATCGAAGCC
	CACAGAGTCCTTCCACAGAGG
In vitro transcription
Name	Oligo sequence (5'-3')
T7 IAPez_1	TAATACGACTCACTATAGAAGATCCCTCATTCCAGAACC
	GCCTGTCTAACTGCACCAAG
T7 IAPez_2	TAATACGACTCACTATAGAAAACTCGGGACTGGCGC
	GGGAATGAATGAGTCTGCGC
Generation of in vivo zygotic knockout embryos
Name	Protospacer sequence
Trim28 guide RNA_1	GCGAATAATTCGGGGGATGG
Trim28 guide RNA_2	TATGCGTGATAGTGGCAGTA
Trim28 guide RNA_3	GAGGAACCAACGTAAACTCT
Trim28 guide RNA_4	AGCCGCGTCGTCCCCTGCGG
Trim28 guide RNA_5	CGTCCTGGTACGAACTCCAC
Trim28 guide RNA_6	ATGCGGCTCTGCACTTGAAT
Nanog guide RNA_1	GAGAACTATTCTTGCTTACA
Nanog guide RNA_2	AGGAGAACAAGGTCCTTGCC
Nanog guide RNA_3	GGCCCAGCTGTGTGCACTCA
GFP guide RNA	GAAGTTCGAGGGCGACACCC

## Sheet: GEO IDs of public data
Table S1C. GEO IDs of public data used in this study
GEO ID	Description	Publication
GSM3457434	scRNA-seq WT E6.5	Chan et al., Nature 2019
GSM3457435	scRNA-seq WT E7.0	Chan et al., Nature 2019
GSM1375159	ChIP-seq HP1α-EGFP mESC	Bulut-Karslioglu et al., Mol Cell 2014
GSM1429903	ChIP-seq H3K9me3 mESC	Elsässer et al., Nature 2015
GSM1555120	ChIP-seq Trim28 mESC	Elsässer et al., Nature 2015
GSM1526287	ChIP-seq H3K27ac mESC	Ji et al., PNAS 2015
GSM1526285	ChIP-seq input for GSM1526287 mESC	Ji et al., PNAS 2015
GSM1082340	ChIP-seq Oct4 mESC	Whyte et al., Cell 2013
GSM1082341	ChIP-seq Sox2 mESC	Whyte et al., Cell 2013
GSM1082342	ChIP-seq Nanog mESC	Whyte et al., Cell 2013
GSM1082343	ChIP-seq input for GSM1082340, GSM1082341 and GSM1082342 mESC	Whyte et al., Cell 2013
