# Supplementary material for: Hijacking of transcriptional condensates by endogenous retroviruses
Source: Research Square preprint supplement (doi:10.21203/rs.3.rs-802409/v1), 2021-09-15
Supplement: Supplementary file 8 [file 2e6144ce4f84eb2aa81519fc.xlsx]

## Sheet: full_length_iap
chr

## Sheet: full_length_mmervk
chr

## Sheet: full_length_mmetn
chr

## Sheet: full_length_l1
chr

## Sheet: all_iap_ltrs
chr

## Sheet: mESC_enhancer_constituents
chr

## Sheet: mESC_super_enhancers
chr

## Sheet: mESC_typical_enhancers
chr
