# Supplementary material for: Hijacking of transcriptional condensates by endogenous retroviruses
Source: Research Square preprint supplement (doi:10.21203/rs.3.rs-802409/v1), 2021-09-15
Supplement: Supplementary file 9 [file 3c42d76abfc59d9d922a5c97.xlsx]

## Sheet: 0h and 24h
Protein IDs	Majority protein IDs	Peptide counts (all)	Peptide counts (razor+unique)	Peptide counts (unique)	Protein names	Gene names	Fasta headers	Number of proteins	Peptides	Razor + unique peptides	Unique peptides	Peptides C1	Peptides C2	Peptides C3	Peptides dT1-dTAG-1	Peptides dT2-dTAG-2	Peptides dT3-dTAG-3	Razor + unique peptides C1	Razor + unique peptides C2	Razor + unique peptides C3	Razor + unique peptides dT1-dTAG-1	Razor + unique peptides dT2-dTAG-2	Razor + unique peptides dT3-dTAG-3	Unique peptides C1	Unique peptides C2	Unique peptides C3	Unique peptides dT1-dTAG-1	Unique peptides dT2-dTAG-2	Unique peptides dT3-dTAG-3	Sequence coverage [%]	Unique + razor sequence coverage [%]	Unique sequence coverage [%]	Mol. weight [kDa]	Sequence length	Sequence lengths	Fraction average	Fraction 1	Fraction 3	Fraction 4	Fraction 5	Fraction 6	Q-value	Score	Identification type C1	Identification type C2	Identification type C3	Identification type dT1-dTAG-1	Identification type dT2-dTAG-2	Identification type dT3-dTAG-3
A0A067XG53;O70589-2;O70589-3;O70589-4;O70589-5;O70589;F6ZQR2	A0A067XG53;O70589-2;O70589-3;O70589-4;O70589-5;O70589;F6ZQR2	6;6;6;6;6;6;3	6;6;6;6;6;6;3	6;6;6;6;6;6;3	Peripheral plasma membrane protein CASK	Cask	tr|A0A067XG53|A0A067XG53_MOUSE Peripheral plasma membrane protein CASK (Fragment) OS=Mus musculus OX=10090 GN=Cask PE=1 SV=1;sp|O70589-2|CSKP_MOUSE Isoform 2 of Peripheral plasma membrane protein CASK OS=Mus musculus OX=10090 GN=Cask;sp|O70589-3|CSKP_MOUSE	7	6	6	6	5	5	4	5	5	3	5	5	4	5	5	3	5	5	4	5	5	3	7.9	7.9	7.9	99.226	871	871;664;897;908;920;926;249	4.07	1	12	6	5	6	0	21.896	By MS/MS	By MS/MS	By MS/MS	By MS/MS	By MS/MS	By MS/MS
A0A2R8W6L8;Q52L52;A0A075F5C6;P38532-2;P38532	A0A2R8W6L8;Q52L52;A0A075F5C6;P38532-2;P38532	1;1;1;1;1	1;1;1;1;1	1;1;1;1;1	Heat shock factor protein 1	Hsf1	tr|A0A2R8W6L8|A0A2R8W6L8_MOUSE Heat shock factor protein 1 OS=Mus musculus OX=10090 GN=Hsf1 PE=1 SV=1;tr|Q52L52|Q52L52_MOUSE Heat shock factor protein 1 OS=Mus musculus OX=10090 GN=Hsf1 PE=1 SV=1;tr|A0A075F5C6|A0A075F5C6_MOUSE Heat shock factor protein 1 O	5	1	1	1	1	1	0	1	1	0	1	1	0	1	1	0	1	1	0	1	1	0	2.1	2.1	2.1	47.865	438	438;477;531;503;525	5				4		0.0080265	2.0946	By MS/MS	By MS/MS		By MS/MS	By MS/MS
A0A087WP63;A0A087WNX7;A0A087WNL7;A0A087WQ44;E9Q9V7;A0A087WQY5;A0A0U1RQA7	A0A087WP63;A0A087WNX7;A0A087WNL7;A0A087WQ44	8;8;8;8;3;3;1	7;7;7;7;2;2;1	7;7;7;7;2;2;1		Srcap	tr|A0A087WP63|A0A087WP63_MOUSE Predicted gene 42715 (Fragment) OS=Mus musculus OX=10090 GN=Gm42715 PE=1 SV=1;tr|A0A087WNX7|A0A087WNX7_MOUSE Snf2-related CREBBP activator protein OS=Mus musculus OX=10090 GN=Srcap PE=1 SV=1;tr|A0A087WNL7|A0A087WNL7_MOUSE Snf	7	8	7	7	7	3	5	2	4	3	7	2	4	2	4	2	7	2	4	2	4	2	2.8	2.5	2.5	331.54	3095	3095;3114;3210;3271;936;1192;254	4.13		8	7	5	3	0	12.989	By MS/MS	By MS/MS	By MS/MS	By MS/MS	By MS/MS	By MS/MS
A0A087WSR1;A0A087WNR1;E9Q917;G3UWF0;Q80XQ8	A0A087WSR1;A0A087WNR1;E9Q917;G3UWF0;Q80XQ8	1;1;1;1;1	1;1;1;1;1	1;1;1;1;1	Myelin-associated neurite-outgrowth inhibitor	Fam168b	tr|A0A087WSR1|A0A087WSR1_MOUSE Myelin-associated neurite-outgrowth inhibitor OS=Mus musculus OX=10090 GN=Fam168b PE=1 SV=1;tr|A0A087WNR1|A0A087WNR1_MOUSE Myelin-associated neurite-outgrowth inhibitor (Fragment) OS=Mus musculus OX=10090 GN=Fam168b PE=1 SV=1	5	1	1	1	1	0	1	0	0	0	1	0	1	0	0	0	1	0	1	0	0	0	25.7	25.7	25.7	7.3953	70	70;92;201;206;194	3		2				0.003405	2.4632	By MS/MS		By matching
A0A087WNS9;A0A087WQ65;A0A087WRZ2;A0A087WNT2;A0A087WPY4;Q99JA5;Q64253	A0A087WNS9;A0A087WQ65;A0A087WRZ2;A0A087WNT2;A0A087WPY4;Q99JA5;Q64253	1;1;1;1;1;1;1	1;1;1;1;1;1;1	1;1;1;1;1;1;1	Lymphocyte antigen 6E	Ly6e	tr|A0A087WNS9|A0A087WNS9_MOUSE Lymphocyte antigen 6E (Fragment) OS=Mus musculus OX=10090 GN=Ly6e PE=1 SV=6;tr|A0A087WQ65|A0A087WQ65_MOUSE Lymphocyte antigen 6E (Fragment) OS=Mus musculus OX=10090 GN=Ly6e PE=1 SV=1;tr|A0A087WRZ2|A0A087WRZ2_MOUSE Lymphocyte	7	1	1	1	1	1	1	1	1	1	1	1	1	1	1	1	1	1	1	1	1	1	22.2	22.2	22.2	6.9541	63	63;113;117;117;119;136;130	3.33	6		6	6		0	47.338	By MS/MS	By MS/MS	By MS/MS	By MS/MS	By MS/MS	By MS/MS
A0A087WQE6;A0A087WNT1;P83940;A0A087WPE4	A0A087WQE6;A0A087WNT1;P83940	5;5;5;2	5;5;5;2	5;5;5;2	Transcription elongation factor B polypeptide 1	Tceb1	tr|A0A087WQE6|A0A087WQE6_MOUSE Elongin-C (Fragment) OS=Mus musculus OX=10090 GN=Eloc PE=1 SV=1;tr|A0A087WNT1|A0A087WNT1_MOUSE Elongin-C OS=Mus musculus OX=10090 GN=Eloc PE=1 SV=1;sp|P83940|ELOC_MOUSE Elongin-C OS=Mus musculus OX=10090 GN=Eloc PE=1 SV=1	4	5	5	5	5	4	5	5	4	5	5	4	5	5	4	5	5	4	5	5	4	5	66.3	66.3	66.3	10.657	95	95;134;112;51	3.89	26	11	11	32	23	0	59.487	By MS/MS	By MS/MS	By MS/MS	By MS/MS	By MS/MS	By MS/MS
A0A087WNU6;G5E8E1;A0A087WSF5	A0A087WNU6;G5E8E1;A0A087WSF5	5;5;4	1;1;1	1;1;1		Lrrfip1	tr|A0A087WNU6|A0A087WNU6_MOUSE Leucine-rich repeat flightless-interacting protein 1 (Fragment) OS=Mus musculus OX=10090 GN=Lrrfip1 PE=1 SV=1;tr|G5E8E1|G5E8E1_MOUSE Leucine rich repeat (In FLII) interacting protein 1, isoform CRA_e OS=Mus musculus OX=10090	3	5	1	1	4	3	4	4	3	2	1	1	1	1	1	0	1	1	1	1	1	0	11.7	2.3	2.3	64.931	575	575;428;323	3		5				0.0034099	2.4847	By MS/MS	By MS/MS	By MS/MS	By MS/MS	By MS/MS	By matching
A0A087WNV1;A0A087WSR7;A0A087WR52;Q8K2K6-3;Q8K2K6-1;Q8K2K6;Q8K2K6-2;A0A087WRL1	A0A087WNV1;A0A087WSR7;A0A087WR52;Q8K2K6-3;Q8K2K6-1;Q8K2K6;Q8K2K6-2;A0A087WRL1	6;6;6;6;6;6;5;3	6;6;6;6;6;6;5;3	6;6;6;6;6;6;5;3	Arf-GAP domain and FG repeat-containing protein 1	Agfg1	tr|A0A087WNV1|A0A087WNV1_MOUSE Arf-GAP domain and FG repeat-containing protein 1 OS=Mus musculus OX=10090 GN=Agfg1 PE=1 SV=1;tr|A0A087WSR7|A0A087WSR7_MOUSE Arf-GAP domain and FG repeat-containing protein 1 OS=Mus musculus OX=10090 GN=Agfg1 PE=1 SV=1;tr|A0A	8	6	6	6	6	6	6	5	5	4	6	6	6	5	5	4	6	6	6	5	5	4	20.9	20.9	20.9	53.974	521	521;537;580;530;559;561;540;200	4.15	17		11	24	19	0	70.278	By MS/MS	By MS/MS	By MS/MS	By MS/MS	By MS/MS	By MS/MS
Q80TV8;A0A087WS18;E9QKH0;A0A087WRE8;E9QNY9;A0A087WP42;A0A087WRK0;A0A087WNW8;A0A087WQ95;A0A087WQF1;J3QP81;E9Q6L0;A0A087WQ31;Q80TV8-2;A0A0A6YXZ1;A0A0A6YWK1;A0A0N4SVH2;A0A087WRU7;A0A0N4SUT7	Q80TV8;A0A087WS18;E9QKH0;A0A087WRE8;E9QNY9;A0A087WP42;A0A087WRK0;A0A087WNW8;A0A087WQ95;A0A087WQF1;J3QP81;E9Q6L0;A0A087WQ31;Q80TV8-2;A0A0A6YXZ1	17;17;17;17;17;17;17;17;17;17;17;17;17;17;13;4;3;3;1	17;17;17;17;17;17;17;17;17;17;17;17;17;17;13;4;3;3;1	16;16;16;16;16;16;16;16;16;16;16;16;16;16;12;4;3;3;1	CLIP-associating protein 1	Clasp1	sp|Q80TV8|CLAP1_MOUSE CLIP-associating protein 1 OS=Mus musculus OX=10090 GN=Clasp1 PE=1 SV=2;tr|A0A087WS18|A0A087WS18_MOUSE CLIP-associating protein 1 OS=Mus musculus OX=10090 GN=Clasp1 PE=1 SV=2;tr|E9QKH0|E9QKH0_MOUSE CLIP-associating protein 1 OS=Mus mu	19	17	17	16	13	10	12	12	13	11	13	10	12	12	13	11	12	9	11	11	12	10	14.2	14.2	13.7	169.23	1535	1535;1460;1536;1526;1526;1492;1477;1475;1469;1468;1459;1452;1552;1525;1244;345;177;73;285	3.77	24	14	20	23	20	0	102.67	By MS/MS	By MS/MS	By MS/MS	By MS/MS	By MS/MS	By MS/MS
A0A087WQC5;A0A087WR62;A0A087WPS7;A0A087WPI2;A0A0R4J2C6;A0A0R4J2C1;Q9QXJ1-2;Q9QXJ1	A0A087WQC5;A0A087WR62;A0A087WPS7;A0A087WPI2;A0A0R4J2C6;A0A0R4J2C1;Q9QXJ1-2;Q9QXJ1	1;1;1;1;1;1;1;1	1;1;1;1;1;1;1;1	1;1;1;1;1;1;1;1	Amyloid beta A4 precursor protein-binding family B member 1	Apbb1	tr|A0A087WQC5|A0A087WQC5_MOUSE Amyloid beta (A4) protein-binding, family B, member 1, isoform CRA_b OS=Mus musculus OX=10090 GN=Apbb1 PE=1 SV=1;tr|A0A087WR62|A0A087WR62_MOUSE Amyloid-beta A4 precursor protein-binding family B member 1 OS=Mus musculus OX=10	8	1	1	1	0	0	1	0	0	0	0	0	1	0	0	0	0	0	1	0	0	0	5.1	5.1	5.1	25.784	235	235;451;485;487;708;710;708;710	6					1	0.0028902	2.5692			By MS/MS
A0A087WPL5;O70133;O70133-3;A0A0R4J2C3;A0A087WRT3	A0A087WPL5;O70133;O70133-3	38;37;26;18;2	1;1;0;1;0	1;1;0;1;0	ATP-dependent RNA helicase A	Dhx9	tr|A0A087WPL5|A0A087WPL5_MOUSE ATP-dependent RNA helicase A OS=Mus musculus OX=10090 GN=Dhx9 PE=1 SV=1;sp|O70133|DHX9_MOUSE ATP-dependent RNA helicase A OS=Mus musculus OX=10090 GN=Dhx9 PE=1 SV=2;sp|O70133-3|DHX9_MOUSE Isoform 3 of ATP-dependent RNA helica	5	38	1	1	30	28	27	28	24	27	1	1	1	1	1	1	1	1	1	1	1	1	32.9	2	2	149.62	1383	1383;1380;1164;459;47	3.27	5		6	4		0	43.184	By MS/MS	By MS/MS	By MS/MS	By MS/MS	By MS/MS	By MS/MS
A0A087WRS3;A0A087WPP8;Q6AXH6;Q6AXD2;P62484;A0A087WR90	A0A087WRS3;A0A087WPP8;Q6AXH6;Q6AXD2;P62484;A0A087WR90	4;4;4;4;4;2	2;2;2;2;2;1	2;2;2;2;2;1	Abl interactor 2	Abi2	tr|A0A087WRS3|A0A087WRS3_MOUSE Abl interactor 2 OS=Mus musculus OX=10090 GN=Abi2 PE=1 SV=1;tr|A0A087WPP8|A0A087WPP8_MOUSE Abl interactor 2 OS=Mus musculus OX=10090 GN=Abi2 PE=1 SV=1;tr|Q6AXH6|Q6AXH6_MOUSE Abi2 protein OS=Mus musculus OX=10090 GN=Abi2 PE=1	6	4	2	2	2	3	2	3	3	2	1	2	1	2	1	1	1	2	1	2	1	1	9.6	5.7	5.7	49.358	458	458;475;480;487;446;151	3.62		6		1	1	0.0002103	4.8375	By MS/MS	By MS/MS	By MS/MS	By MS/MS	By MS/MS	By MS/MS
A0A087WPR7	A0A087WPR7	38	1	1		Dst	tr|A0A087WPR7|A0A087WPR7_MOUSE Dystonin (Fragment) OS=Mus musculus OX=10090 GN=Dst PE=1 SV=1	1	38	1	1	26	24	28	29	28	18	1	1	1	1	1	1	1	1	1	1	1	1	15.6	0.4	0.4	331.49	2987	2987	3		6				0	7.0329	By MS/MS	By MS/MS	By MS/MS	By MS/MS	By MS/MS	By MS/MS
Q6P549;A0A087WPT7;A0A1B0GR64	Q6P549;A0A087WPT7	9;9;3	9;9;3	9;9;3	Phosphatidylinositol 3,4,5-trisphosphate 5-phosphatase 2	Inppl1	sp|Q6P549|SHIP2_MOUSE Phosphatidylinositol 3,4,5-trisphosphate 5-phosphatase 2 OS=Mus musculus OX=10090 GN=Inppl1 PE=1 SV=1;tr|A0A087WPT7|A0A087WPT7_MOUSE Phosphatidylinositol 3,4,5-trisphosphate 5-phosphatase 2 (Fragment) OS=Mus musculus OX=10090 GN=Inppl	3	9	9	9	9	8	7	9	8	7	9	8	7	9	8	7	9	8	7	9	8	7	8.4	8.4	8.4	138.97	1257	1257;1166;603	4.28	3	4	30	11	9	0	35.504	By MS/MS	By MS/MS	By MS/MS	By MS/MS	By MS/MS	By MS/MS
E9QPY6;A0A087WQ16;P13705;A0A087WSS2	E9QPY6;A0A087WQ16;P13705	9;9;9;2	9;9;9;2	9;9;9;2	DNA mismatch repair protein Msh3	Msh3	tr|E9QPY6|E9QPY6_MOUSE DNA mismatch repair protein OS=Mus musculus OX=10090 GN=Msh3 PE=1 SV=2;tr|A0A087WQ16|A0A087WQ16_MOUSE DNA mismatch repair protein OS=Mus musculus OX=10090 GN=Msh3 PE=1 SV=1;sp|P13705|MSH3_MOUSE DNA mismatch repair protein Msh3 OS=Mus	4	9	9	9	5	6	6	7	5	4	5	6	6	7	5	4	5	6	6	7	5	4	9.5	9.5	9.5	123.28	1094	1094;1095;1091;360	4.7		8	6	7	12	0	18.433	By MS/MS	By MS/MS	By MS/MS	By MS/MS	By MS/MS	By MS/MS
A0A087WQ61;A0A087WQU0;Q8C134;Q9ERD6-2;Q9ERD6-3;Q9ERD6-4;Q9ERD6;A0A087WPL3	A0A087WQ61;A0A087WQU0;Q8C134;Q9ERD6-2;Q9ERD6-3;Q9ERD6-4;Q9ERD6;A0A087WPL3	2;2;2;2;2;2;2;1	2;2;2;2;2;2;2;1	2;2;2;2;2;2;2;1	Ras-specific guanine nucleotide-releasing factor RalGPS2	Ralgps2	tr|A0A087WQ61|A0A087WQ61_MOUSE Ras-specific guanine nucleotide-releasing factor RalGPS2 OS=Mus musculus OX=10090 GN=Ralgps2 PE=1 SV=1;tr|A0A087WQU0|A0A087WQU0_MOUSE Ras-specific guanine nucleotide-releasing factor RalGPS2 OS=Mus musculus OX=10090 GN=Ralgps	8	2	2	2	2	2	2	2	2	2	2	2	2	2	2	2	2	2	2	2	2	2	5.8	5.8	5.8	51.006	463	463;489;523;555;564;568;590;128	4.87			6	5	4	0	8.1604	By MS/MS	By MS/MS	By MS/MS	By MS/MS	By MS/MS	By MS/MS
A0A087WQB0;P60762-2;P60762;A0A087WQ34	A0A087WQB0;P60762-2;P60762	7;7;6;2	7;7;6;2	7;7;6;2	Mortality factor 4-like protein 1	Morf4l1	tr|A0A087WQB0|A0A087WQB0_MOUSE Mortality factor 4-like protein 1 OS=Mus musculus OX=10090 GN=Morf4l1 PE=1 SV=1;sp|P60762-2|MO4L1_MOUSE Isoform 2 of Mortality factor 4-like protein 1 OS=Mus musculus OX=10090 GN=Morf4l1;sp|P60762|MO4L1_MOUSE Mortality factor	4	7	7	7	6	6	7	6	6	6	6	6	7	6	6	6	6	6	7	6	6	6	22	22	22	34.343	296	296;323;362;172	3.86	17	3	12	8	19	0	42.765	By MS/MS	By MS/MS	By MS/MS	By MS/MS	By MS/MS	By MS/MS
E9QAN4;G3UW47;Q6TA13;E9Q9G6;A0A087WQE8;P33173;A0A087WSU7	E9QAN4;G3UW47;Q6TA13;E9Q9G6;A0A087WQE8;P33173	10;10;10;10;10;10;1	10;10;10;10;10;10;1	8;8;8;8;8;8;1	Kinesin-like protein;Kinesin-like protein KIF1A	Kif1a	tr|E9QAN4|E9QAN4_MOUSE Kinesin-like protein KIF1A OS=Mus musculus OX=10090 GN=Kif1a PE=1 SV=1;tr|G3UW47|G3UW47_MOUSE Kinesin family member 1A OS=Mus musculus OX=10090 GN=Kif1a PE=1 SV=1;tr|Q6TA13|Q6TA13_MOUSE Kinesin-like protein KIF1A OS=Mus musculus OX=1	7	10	10	8	5	6	7	8	8	3	5	6	7	8	8	3	5	4	6	8	7	3	8.3	8.3	6.6	190.97	1689	1689;1697;1698;1698;1791;1695;109	4.12	5	5	17	20	3	0	38.802	By MS/MS	By MS/MS	By MS/MS	By MS/MS	By MS/MS	By MS/MS
A0A087WQH8	A0A087WQH8	2	2	2		Slc35a4	tr|A0A087WQH8|A0A087WQH8_MOUSE Probable UDP-sugar transporter protein SLC35A4 OS=Mus musculus OX=10090 GN=Slc35a4 PE=1 SV=1	1	2	2	2	1	2	2	2	2	2	1	2	2	2	2	2	1	2	2	2	2	2	21.4	21.4	21.4	11.157	103	103	3.35	6	5			6	0.00058537	3.5661	By MS/MS	By MS/MS	By MS/MS	By MS/MS	By MS/MS	By MS/MS
A0A087WQI3;A0A087WQG4;A0A087WNW3;A0A087WS23;A0A087WQF8;A0A087WS04;Q61595-9;Q61595-14;Q61595-6;Q61595-13;Q61595-2;Q61595-16;A0A087WR91;A0A087WPY8	A0A087WQI3;A0A087WQG4;A0A087WNW3;A0A087WS23;A0A087WQF8;A0A087WS04;Q61595-9;Q61595-14;Q61595-6;Q61595-13;Q61595-2;Q61595-16	37;36;36;36;35;35;34;33;33;33;32;32;6;6	1;1;1;1;1;1;1;1;1;1;1;1;0;0	0;0;0;0;0;0;0;0;0;0;0;0;0;0	Kinectin	Ktn1	tr|A0A087WQI3|A0A087WQI3_MOUSE Kinectin OS=Mus musculus OX=10090 GN=Ktn1 PE=1 SV=1;tr|A0A087WQG4|A0A087WQG4_MOUSE Kinectin OS=Mus musculus OX=10090 GN=Ktn1 PE=1 SV=1;tr|A0A087WNW3|A0A087WNW3_MOUSE Kinectin OS=Mus musculus OX=10090 GN=Ktn1 PE=1 SV=1;tr|A0A0	14	37	1	0	31	29	35	32	26	28	1	1	1	1	1	1	0	0	0	0	0	0	37.6	1.8	0	143.64	1252	1252;1229;1247;1253;1200;1224;1252;1229;1247;1253;1200;1224;176;178	2.37	6	13				0	63.16	By MS/MS	By MS/MS	By MS/MS	By MS/MS	By MS/MS	By MS/MS
B7ZNP0;A0A087WQK5;A0A087WR24;Q2HXL6	B7ZNP0;A0A087WQK5;A0A087WR24;Q2HXL6	2;2;2;2	2;2;2;2	2;2;2;2	alpha-1,2-Mannosidase;ER degradation-enhancing alpha-mannosidase-like protein 3	Edem3	tr|B7ZNP0|B7ZNP0_MOUSE alpha-1,2-Mannosidase OS=Mus musculus OX=10090 GN=Edem3 PE=1 SV=1;tr|A0A087WQK5|A0A087WQK5_MOUSE alpha-1,2-Mannosidase OS=Mus musculus OX=10090 GN=Edem3 PE=1 SV=1;tr|A0A087WR24|A0A087WR24_MOUSE alpha-1,2-Mannosidase OS=Mus musculus O	4	2	2	2	2	1	0	1	1	1	2	1	0	1	1	1	2	1	0	1	1	1	2.2	2.2	2.2	102.22	913	913;917;947;931	3.33		5		1		0.0009522	3.237	By MS/MS	By MS/MS		By MS/MS	By MS/MS	By MS/MS
A0A087WQN7;F8VQ87;P97789-2;P97789;P97789-3;A0A087WNV6	A0A087WQN7;F8VQ87;P97789-2;P97789;P97789-3	11;11;11;11;9;5	11;11;11;11;9;5	11;11;11;11;9;5	5-3 exoribonuclease 1	Xrn1	tr|A0A087WQN7|A0A087WQN7_MOUSE 5-3 exoribonuclease 1 OS=Mus musculus OX=10090 GN=Xrn1 PE=1 SV=1;tr|F8VQ87|F8VQ87_MOUSE 5-3 exoribonuclease 1 OS=Mus musculus OX=10090 GN=Xrn1 PE=1 SV=1;sp|P97789-2|XRN1_MOUSE Isoform 2 of 5-3 exoribonuclease 1 OS=Mus m	6	11	11	11	9	6	6	9	7	5	9	6	6	9	7	5	9	6	6	9	7	5	9.8	9.8	9.8	194.3	1719	1719;1723;1706;1719;1687;969	4.45	6	6	7	14	16	0	27.192	By MS/MS	By MS/MS	By MS/MS	By MS/MS	By MS/MS	By MS/MS
A0A087WQS2;Q9CQC6;A0A087WPF9;A0A087WS48	A0A087WQS2;Q9CQC6;A0A087WPF9	17;17;12;1	17;17;12;1	16;16;12;1	Basic leucine zipper and W2 domain-containing protein 1	Bzw1	tr|A0A087WQS2|A0A087WQS2_MOUSE Basic leucine zipper and W2 domain-containing protein 1 OS=Mus musculus OX=10090 GN=Bzw1 PE=1 SV=1;sp|Q9CQC6|BZW1_MOUSE Basic leucine zipper and W2 domain-containing protein 1 OS=Mus musculus OX=10090 GN=Bzw1 PE=1 SV=1;tr|A0A	4	17	17	16	15	11	14	14	12	14	15	11	14	14	12	14	14	10	13	13	11	13	29.9	29.9	28.4	51.209	451	451;419;253;105	3.7	76	15	45	57	56	0	32.012	By MS/MS	By MS/MS	By MS/MS	By MS/MS	By MS/MS	By MS/MS
A0A0U1RNL0;A0A087WQS9;A0A0A6YX17;Q9CWU0-2;Q9CWU0;D3YZI6;A0A0U1RNP6	A0A0U1RNL0;A0A087WQS9;A0A0A6YX17;Q9CWU0-2;Q9CWU0;D3YZI6	5;5;5;5;5;4;1	5;5;5;5;5;4;1	5;5;5;5;5;4;1	Putative ATP-dependent RNA helicase TDRD12	Tdrd12	tr|A0A0U1RNL0|A0A0U1RNL0_MOUSE Putative ATP-dependent RNA helicase TDRD12 OS=Mus musculus OX=10090 GN=Tdrd12 PE=1 SV=1;tr|A0A087WQS9|A0A087WQS9_MOUSE Putative ATP-dependent RNA helicase TDRD12 (Fragment) OS=Mus musculus OX=10090 GN=Tdrd12 PE=1 SV=5;tr|A0A0	7	5	5	5	4	3	4	3	3	2	4	3	4	3	3	2	4	3	4	3	3	2	13.6	13.6	13.6	40.317	354	354;1113;1216;407;1215;204;127	4.04	5	6	1		11	0	9.6311	By MS/MS	By MS/MS	By MS/MS	By MS/MS	By MS/MS	By MS/MS
A0A087WQT6;O89110	A0A087WQT6;O89110	3;3	3;3	3;3	Caspase-8;Caspase-8 subunit p18;Caspase-8 subunit p10	Casp8	tr|A0A087WQT6|A0A087WQT6_MOUSE Caspase-8 OS=Mus musculus OX=10090 GN=Casp8 PE=1 SV=1;sp|O89110|CASP8_MOUSE Caspase-8 OS=Mus musculus OX=10090 GN=Casp8 PE=1 SV=1	2	3	3	3	1	1	0	1	1	2	1	1	0	1	1	2	1	1	0	1	1	2	6.4	6.4	6.4	57.82	500	500;480	6					6	0.0053116	2.296	By MS/MS	By MS/MS		By MS/MS	By MS/MS	By MS/MS
A0A087WQU5;A0A087WS96;Q8BG73	A0A087WQU5;A0A087WS96;Q8BG73	1;1;1	1;1;1	1;1;1	SH3 domain-binding glutamic acid-rich-like protein;SH3 domain-binding glutamic acid-rich-like protein 2	Sh3bgrl2	tr|A0A087WQU5|A0A087WQU5_MOUSE SH3 domain-binding glutamic acid-rich-like protein OS=Mus musculus OX=10090 GN=Sh3bgrl2 PE=1 SV=1;tr|A0A087WS96|A0A087WS96_MOUSE SH3 domain-binding glutamic acid-rich-like protein OS=Mus musculus OX=10090 GN=Sh3bgrl2 PE=1 SV=	3	1	1	1	1	1	1	1	1	1	1	1	1	1	1	1	1	1	1	1	1	1	14	14	14	10.493	93	93;120;107	4	4				6	0	5.8314	By MS/MS	By MS/MS	By MS/MS	By MS/MS	By MS/MS	By MS/MS
A0A087WS56;Q3UHL6;A0A087WR50;P11276;B7ZNJ1;B9EHT6;A0A087WSN6;A0A087WSU6;A0A087WS99;Q4KL80	A0A087WS56;Q3UHL6;A0A087WR50;P11276;B7ZNJ1;B9EHT6;A0A087WSN6	9;9;9;9;7;7;7;1;1;1	9;9;9;9;7;7;7;1;1;1	9;9;9;9;7;7;7;1;1;1	Fibronectin;Anastellin	Fn1	tr|A0A087WS56|A0A087WS56_MOUSE Fibronectin OS=Mus musculus OX=10090 GN=Fn1 PE=1 SV=1;tr|Q3UHL6|Q3UHL6_MOUSE Fibronectin OS=Mus musculus OX=10090 GN=Fn1 PE=1 SV=1;tr|A0A087WR50|A0A087WR50_MOUSE Fibronectin OS=Mus musculus OX=10090 GN=Fn1 PE=1 SV=1;sp|P11276	10	9	9	9	7	5	6	5	4	4	7	5	6	5	4	4	7	5	6	5	4	4	5.1	5.1	5.1	249.55	2266	2266;2361;2386;2477;2176;2271;2296;67;200;383	4.35	2		17	17	1	0	20.488	By MS/MS	By MS/MS	By MS/MS	By MS/MS	By MS/MS	By MS/MS
A0A087WRH3;A0A0R4J044;P57724;A0A087WSI1;A0A1L1SUS5;A0A1L1SQ99;A0A087WR61;A0A1L1SRP9;A0A087WQ06;A0A1L1SQB0;A0A087WRJ6;A0A087WP16;A0A1L1SQL8	A0A087WRH3;A0A0R4J044;P57724;A0A087WSI1;A0A1L1SUS5;A0A1L1SQ99;A0A087WR61;A0A1L1SRP9	5;5;5;4;4;4;3;3;1;1;1;1;1	4;4;4;3;3;3;2;2;1;1;1;1;1	4;4;4;3;3;3;2;2;1;1;1;1;1	Poly(rC)-binding protein 4	Pcbp4	tr|A0A087WRH3|A0A087WRH3_MOUSE Poly(rC)-binding protein 4 (Fragment) OS=Mus musculus OX=10090 GN=Pcbp4 PE=1 SV=1;tr|A0A0R4J044|A0A0R4J044_MOUSE Poly(rC)-binding protein 4 OS=Mus musculus OX=10090 GN=Pcbp4 PE=1 SV=1;sp|P57724|PCBP4_MOUSE Poly(rC)-binding pr	13	5	4	4	5	5	5	5	5	5	4	4	4	4	4	4	4	4	4	4	4	4	34.5	30.5	30.5	20.486	197	197;403;403;119;149;190;113;158;77;141;150;168;222	3.55	14	1	20	12	4	0	16.332	By MS/MS	By MS/MS	By MS/MS	By MS/MS	By MS/MS	By MS/MS
A0A087WRM0	A0A087WRM0	6	1	1		Cdv3	tr|A0A087WRM0|A0A087WRM0_MOUSE Protein CDV3 (Fragment) OS=Mus musculus OX=10090 GN=Cdv3 PE=1 SV=1	1	6	1	1	5	5	5	5	5	5	1	1	0	1	1	0	1	1	0	1	1	0	60.4	19.5	19.5	16.418	154	154	5				4		0	5.3396	By MS/MS	By MS/MS	By matching	By MS/MS	By MS/MS	By matching
F2Z4A3;A0A087WRT4;A0A1L1SQU7;A0A087WPU4	F2Z4A3;A0A087WRT4;A0A1L1SQU7	16;16;16;2	16;16;16;2	16;16;16;2		Fat1	tr|F2Z4A3|F2Z4A3_MOUSE FAT atypical cadherin 1 OS=Mus musculus OX=10090 GN=Fat1 PE=1 SV=1;tr|A0A087WRT4|A0A087WRT4_MOUSE FAT atypical cadherin 1 OS=Mus musculus OX=10090 GN=Fat1 PE=1 SV=2;tr|A0A1L1SQU7|A0A1L1SQU7_MOUSE FAT atypical cadherin 1 OS=Mus muscul	4	16	16	16	11	10	10	9	9	7	11	10	10	9	9	7	11	10	10	9	9	7	4.4	4.4	4.4	506.26	4590	4590;4602;4645;159	4.67		7	12	40	5	0	32.093	By MS/MS	By MS/MS	By MS/MS	By MS/MS	By MS/MS	By MS/MS
A0A087WRY3;Q80XU3	A0A087WRY3;Q80XU3	1;1	1;1	1;1	Nuclear ubiquitous casein and cyclin-dependent kinase substrate 1	Nucks1	tr|A0A087WRY3|A0A087WRY3_MOUSE Nuclear ubiquitous casein and cyclin-dependent kinase substrate 1 OS=Mus musculus OX=10090 GN=Nucks1 PE=1 SV=1;sp|Q80XU3|NUCKS_MOUSE Nuclear ubiquitous casein and cyclin-dependent kinase substrate 1 OS=Mus musculus OX=10090 G	2	1	1	1	1	1	1	1	1	1	1	1	1	1	1	1	1	1	1	1	1	1	11.2	11.2	11.2	26.184	233	233;234	2.27	4	7				0	28.377	By MS/MS	By MS/MS	By MS/MS	By MS/MS	By MS/MS	By MS/MS
A0A087WS76;A0A140LHL6;E9Q3S4	A0A087WS76;A0A140LHL6;E9Q3S4	1;1;1	1;1;1	1;1;1	Mitogen-activated protein kinase kinase kinase 19	Map3k19	tr|A0A087WS76|A0A087WS76_MOUSE Mitogen-activated protein kinase kinase kinase 19 (Fragment) OS=Mus musculus OX=10090 GN=Map3k19 PE=4 SV=2;tr|A0A140LHL6|A0A140LHL6_MOUSE Mitogen-activated protein kinase kinase kinase 19 OS=Mus musculus OX=10090 GN=Map3k19 P	3	1	1	1	1	1	1	1	1	1	1	1	1	1	1	1	1	1	1	1	1	1	0.6	0.6	0.6	135.87	1211	1211;1515;1311	3.81	6		5	6	4	0.0078768	2.1328	By MS/MS	By MS/MS	By MS/MS	By MS/MS	By MS/MS	By MS/MS
A0A087WSI8;A0A0R4J0I6;Q80XL6;D3YTQ5;F6U473	A0A087WSI8;A0A0R4J0I6;Q80XL6	5;5;5;2;1	5;5;5;2;1	5;5;5;2;1	Acyl-CoA dehydrogenase family member 11	Acad11	tr|A0A087WSI8|A0A087WSI8_MOUSE Acyl-CoA dehydrogenase family member 11 OS=Mus musculus OX=10090 GN=Acad11 PE=1 SV=2;tr|A0A0R4J0I6|A0A0R4J0I6_MOUSE Acyl-CoA dehydrogenase family member 11 OS=Mus musculus OX=10090 GN=Acad11 PE=1 SV=1;sp|Q80XL6|ACD11_MOUSE Ac	5	5	5	5	4	2	3	4	3	2	4	2	3	4	3	2	4	2	3	4	3	2	11.5	11.5	11.5	60.999	541	541;779;779;661;122	4	3	12	1	7	7	0	22.567	By MS/MS	By MS/MS	By MS/MS	By MS/MS	By MS/MS	By MS/MS
F6YX19;A0A087WSN5;F7DFD7;Q99LV7;F6RUP6;Q99LV7-2	F6YX19;A0A087WSN5;F7DFD7;Q99LV7;F6RUP6;Q99LV7-2	2;2;2;2;1;1	2;2;2;2;1;1	2;2;2;2;1;1	Phosphatidylinositol-glycan biosynthesis class X protein	Pigx	tr|F6YX19|F6YX19_MOUSE Phosphatidylinositol-glycan biosynthesis class X protein OS=Mus musculus OX=10090 GN=Pigx PE=1 SV=1;tr|A0A087WSN5|A0A087WSN5_MOUSE Phosphatidylinositol-glycan biosynthesis class X protein OS=Mus musculus OX=10090 GN=Pigx PE=1 SV=1;tr	6	2	2	2	2	2	2	2	2	2	2	2	2	2	2	2	2	2	2	2	2	2	7.9	7.9	7.9	28.441	252	252;252;254;254;106;150	4.08			12	1		0	7.5783	By MS/MS	By MS/MS	By MS/MS	By MS/MS	By MS/MS	By MS/MS
Q99K94;Q8C3V4;A0A087WSP5;P42225;A0A087WRI1;Q8CFQ1	Q99K94;Q8C3V4;A0A087WSP5;P42225;A0A087WRI1;Q8CFQ1	6;6;6;6;3;3	6;6;6;6;3;3	6;6;6;6;3;3	Signal transducer and activator of transcription;Signal transducer and activator of transcription 1	Stat1	tr|Q99K94|Q99K94_MOUSE Signal transducer and activator of transcription OS=Mus musculus OX=10090 GN=Stat1 PE=1 SV=1;tr|Q8C3V4|Q8C3V4_MOUSE Signal transducer and activator of transcription OS=Mus musculus OX=10090 GN=Stat1 PE=1 SV=1;tr|A0A087WSP5|A0A087WSP5	6	6	6	6	5	3	5	6	5	4	5	3	5	6	5	4	5	3	5	6	5	4	9.3	9.3	9.3	83.106	712	712;749;755;749;131;243	4.03		6	16	7		0	12.641	By MS/MS	By MS/MS	By MS/MS	By MS/MS	By MS/MS	By MS/MS
A0A087WSS1;G3X9J4;E9QM90;Q148V7-2;Q148V7;Q148V7-3;A0A087WRM8	A0A087WSS1;G3X9J4;E9QM90;Q148V7-2;Q148V7;Q148V7-3	6;6;6;6;6;5;1	6;6;6;6;6;5;1	6;6;6;6;6;5;1	LisH domain and HEAT repeat-containing protein KIAA1468	2310035C23Rik;Kiaa1468	tr|A0A087WSS1|A0A087WSS1_MOUSE RAB11-binding protein RELCH OS=Mus musculus OX=10090 GN=Relch PE=1 SV=1;tr|G3X9J4|G3X9J4_MOUSE RAB11-binding protein RELCH OS=Mus musculus OX=10090 GN=Relch PE=1 SV=2;tr|E9QM90|E9QM90_MOUSE RAB11-binding protein RELCH OS=Mus	7	6	6	6	4	3	3	4	2	3	4	3	3	4	2	3	4	3	3	4	2	3	8.6	8.6	8.6	131.87	1192	1192;1216;1216;1192;1216;968;354	4.81	2		8	6	11	0	27.176	By MS/MS	By MS/MS	By MS/MS	By MS/MS	By MS/MS	By MS/MS
A0A096P6K7;Q8CHZ9;B9EJ57	A0A096P6K7;Q8CHZ9;B9EJ57	2;2;2	2;2;2	2;2;2	Transcription termination factor 1a, mitochondrial;Transcription termination factor 1b, mitochondrial	Mterf1b;Mterf1a	tr|A0A096P6K7|A0A096P6K7_MOUSE Transcription termination factor 1b, mitochondrial OS=Mus musculus OX=10090 GN=Mterf1b PE=4 SV=1;sp|Q8CHZ9|MTF1A_MOUSE Transcription termination factor 1a, mitochondrial OS=Mus musculus OX=10090 GN=Mterf1a PE=2 SV=1;sp|B9EJ57	3	2	2	2	1	1	1	1	1	0	1	1	1	1	1	0	1	1	1	1	1	0	7.3	7.3	7.3	44.004	381	381;379;379	5				5		0.00021013	4.8099	By MS/MS	By MS/MS	By MS/MS	By MS/MS	By MS/MS
A0A0A0MQ68;Q60759	A0A0A0MQ68;Q60759	3;3	3;3	3;3	Glutaryl-CoA dehydrogenase, mitochondrial	Gcdh	tr|A0A0A0MQ68|A0A0A0MQ68_MOUSE Glutaryl-CoA dehydrogenase, mitochondrial OS=Mus musculus OX=10090 GN=Gcdh PE=1 SV=1;sp|Q60759|GCDH_MOUSE Glutaryl-CoA dehydrogenase, mitochondrial OS=Mus musculus OX=10090 GN=Gcdh PE=1 SV=2	2	3	3	3	3	2	3	3	3	0	3	2	3	3	3	0	3	2	3	3	3	0	10.3	10.3	10.3	49.57	447	447;438	4.5	2		3	8	3	0	9.8407	By MS/MS	By MS/MS	By MS/MS	By MS/MS	By MS/MS
Q6PDK2;A0A0A0MQ73;V9GX77	Q6PDK2;A0A0A0MQ73	7;7;1	7;7;1	7;7;1	Histone-lysine N-methyltransferase 2D;Histone-lysine N-methyltransferase	Kmt2d	sp|Q6PDK2|KMT2D_MOUSE Histone-lysine N-methyltransferase 2D OS=Mus musculus OX=10090 GN=Kmt2d PE=1 SV=2;tr|A0A0A0MQ73|A0A0A0MQ73_MOUSE Histone-lysine N-methyltransferase OS=Mus musculus OX=10090 GN=Kmt2d PE=1 SV=1	3	7	7	7	3	1	3	3	5	2	3	1	3	3	5	2	3	1	3	3	5	2	2.1	2.1	2.1	600.24	5588	5588;5588;250	4.41		1	12		4	0	9.8472	By MS/MS	By MS/MS	By MS/MS	By MS/MS	By MS/MS	By MS/MS
A0A0A0MQ80;Q3UMC0;A0A0G2JFY0;D3Z0U5;D6RGM7;D3Z4J2;Q9D3R6-3;Q9D3R6	A0A0A0MQ80;Q3UMC0;A0A0G2JFY0	17;17;16;1;1;1;1;1	17;17;16;1;1;1;1;1	17;17;16;1;1;1;1;1	Spermatogenesis-associated protein 5	Spata5	tr|A0A0A0MQ80|A0A0A0MQ80_MOUSE ATPase family protein 2 homolog OS=Mus musculus OX=10090 GN=Spata5 PE=1 SV=1;sp|Q3UMC0|AFG2H_MOUSE ATPase family protein 2 homolog OS=Mus musculus OX=10090 GN=Spata5 PE=1 SV=2;tr|A0A0G2JFY0|A0A0G2JFY0_MOUSE ATPase family prot	8	17	17	17	13	12	13	12	12	11	13	12	13	12	12	11	13	12	13	12	12	11	24.1	24.1	24.1	97.156	892	892;893;842;277;372;495;409;539	3.97	39	4	26	46	35	0	69.337	By MS/MS	By MS/MS	By MS/MS	By MS/MS	By MS/MS	By MS/MS
V9GXE4;A0A0A0MQ89;Q80US4;Q80US4-3	V9GXE4;A0A0A0MQ89;Q80US4;Q80US4-3	2;2;2;1	2;2;2;1	2;2;2;1	Actin-related protein 5	Actr5	tr|V9GXE4|V9GXE4_MOUSE Actin-related protein 5 OS=Mus musculus OX=10090 GN=Actr5 PE=1 SV=1;tr|A0A0A0MQ89|A0A0A0MQ89_MOUSE Actin-related protein 5 OS=Mus musculus OX=10090 GN=Actr5 PE=1 SV=1;sp|Q80US4|ARP5_MOUSE Actin-related protein 5 OS=Mus musculus OX=10	4	2	2	2	2	2	2	2	2	2	2	2	2	2	2	2	2	2	2	2	2	2	6	6	6	45.23	401	401;608;605;266	3.57	2		12			0	5.7266	By MS/MS	By MS/MS	By MS/MS	By MS/MS	By MS/MS	By MS/MS
A0A0A0MQ90;P97352	A0A0A0MQ90;P97352	3;3	3;3	3;3	Protein S100-A13	S100a13	tr|A0A0A0MQ90|A0A0A0MQ90_MOUSE Protein S100-A13 OS=Mus musculus OX=10090 GN=S100a13 PE=1 SV=1;sp|P97352|S10AD_MOUSE Protein S100-A13 OS=Mus musculus OX=10090 GN=S100a13 PE=1 SV=1	2	3	3	3	2	3	3	1	3	1	2	3	3	1	3	1	2	3	3	1	3	1	20	20	20	17.744	160	160;98	4.8		4	3		8	0	11.974	By MS/MS	By MS/MS	By MS/MS	By MS/MS	By MS/MS	By MS/MS
S4R203;S4R248;A0A0A0MQ95;B2RUJ8;S4R221;Q8C0D4;S4R1B0;S4R2V0	S4R203;S4R248;A0A0A0MQ95;B2RUJ8;S4R221;Q8C0D4;S4R1B0	5;5;5;5;5;5;3;1	5;5;5;5;5;5;3;1	5;5;5;5;5;5;3;1	Rho GTPase-activating protein 12	Arhgap12	tr|S4R203|S4R203_MOUSE Rho GTPase-activating protein 12 OS=Mus musculus OX=10090 GN=Arhgap12 PE=1 SV=1;tr|S4R248|S4R248_MOUSE Rho GTPase-activating protein 12 OS=Mus musculus OX=10090 GN=Arhgap12 PE=1 SV=1;tr|A0A0A0MQ95|A0A0A0MQ95_MOUSE Rho GTPase-activati	8	5	5	5	1	2	4	2	2	4	1	2	4	2	2	4	1	2	4	2	2	4	8	8	8	87.321	766	766;791;796;813;843;838;394;146	4.32	4		2	8	5	0	7.8746	By MS/MS	By MS/MS	By MS/MS	By MS/MS	By MS/MS	By MS/MS
A0A0A0MQ98;G3UZM1;Q69ZK6;G3UYW3	A0A0A0MQ98;G3UZM1;Q69ZK6	26;26;26;5	26;26;26;5	26;26;26;5	Probable JmjC domain-containing histone demethylation protein 2C	Jmjd1c	tr|A0A0A0MQ98|A0A0A0MQ98_MOUSE Probable JmjC domain-containing histone demethylation protein 2C OS=Mus musculus OX=10090 GN=Jmjd1c PE=1 SV=1;tr|G3UZM1|G3UZM1_MOUSE Probable JmjC domain-containing histone demethylation protein 2C OS=Mus musculus OX=10090 GN	4	26	26	26	20	18	20	17	16	18	20	18	20	17	16	18	20	18	20	17	16	18	14.7	14.7	14.7	281.53	2530	2530;2531;2350;744	3.83	33	21	28	28	34	0	121.59	By MS/MS	By MS/MS	By MS/MS	By MS/MS	By MS/MS	By MS/MS
A0A0A0MQ99;V9GXX7;Q8K3D3-2;Q8K3D3	A0A0A0MQ99;V9GXX7;Q8K3D3-2;Q8K3D3	3;3;3;2	3;3;3;2	3;3;3;2	DNA repair protein SWI5 homolog	Swi5	tr|A0A0A0MQ99|A0A0A0MQ99_MOUSE DNA repair protein SWI5 homolog OS=Mus musculus OX=10090 GN=Swi5 PE=1 SV=1;tr|V9GXX7|V9GXX7_MOUSE DNA repair protein SWI5 homolog (Fragment) OS=Mus musculus OX=10090 GN=Swi5 PE=1 SV=1;sp|Q8K3D3-2|SWI5_MOUSE Isoform 2 of DNA r	4	3	3	3	2	2	2	1	2	1	2	2	2	1	2	1	2	2	2	1	2	1	34.4	34.4	34.4	15.175	131	131;140;121;89	3.18	5	18	6	5		0	12.528	By MS/MS	By MS/MS	By MS/MS	By MS/MS	By MS/MS	By MS/MS
A0A0A0MQA5;P68368;A0A087WQS4;A0A087WRB4;Q3UX10;A0A087WSB0;A0A087WSL5;A0A087WS35	A0A0A0MQA5;P68368	23;23;7;6;4;2;2;1	3;3;2;1;0;1;1;1	3;3;2;1;0;1;1;1	Tubulin alpha-4A chain	Tuba4a	tr|A0A0A0MQA5|A0A0A0MQA5_MOUSE Tubulin alpha chain (Fragment) OS=Mus musculus OX=10090 GN=Tuba4a PE=1 SV=1;sp|P68368|TBA4A_MOUSE Tubulin alpha-4A chain OS=Mus musculus OX=10090 GN=Tuba4a PE=1 SV=1	8	23	3	3	23	23	21	23	20	21	3	3	3	3	3	3	3	3	3	3	3	3	46.5	8.2	8.2	52.793	477	477;448;125;100;446;81;89;75	2.68	18	6	18	2		0	52.035	By MS/MS	By MS/MS	By MS/MS	By MS/MS	By MS/MS	By MS/MS
A0A0A0MQB0;Q4PJX1-3;Q4PJX1-2;Q4PJX1	A0A0A0MQB0;Q4PJX1-3;Q4PJX1-2;Q4PJX1	1;1;1;1	1;1;1;1	1;1;1;1	Protein odr-4 homolog	BC003331;Odr4	tr|A0A0A0MQB0|A0A0A0MQB0_MOUSE Protein odr-4 homolog OS=Mus musculus OX=10090 GN=Odr4 PE=1 SV=1;sp|Q4PJX1-3|ODR4_MOUSE Isoform 3 of Protein odr-4 homolog OS=Mus musculus OX=10090 GN=Odr4;sp|Q4PJX1-2|ODR4_MOUSE Isoform 2 of Protein odr-4 homolog OS=Mus musc	4	1	1	1	0	1	1	0	1	0	0	1	1	0	1	0	0	1	1	0	1	0	4.4	4.4	4.4	38.111	339	339;415;425;447	6					3	0	10.783		By MS/MS	By MS/MS		By MS/MS
A0A0R4J1Z4;P25425-3;E9Q6Z8;A0A0A0MQE0;A0A0A0MQM6;I1E4X2;P25425-8;P25425-12;P25425;P25425-5;P25425-2;F8VQL7;P25425-6;P25425-11;P25425-9;P25425-4;P25425-10;P25425-7;Q00196-4;Q00196-5;Q00196-7;Q00196-3;Q3U5D1;Q00196-2;Q00196;P31362;Q00196-6;H3BKB7;H3BJT4	A0A0R4J1Z4;P25425-3;E9Q6Z8;A0A0A0MQE0;A0A0A0MQM6;I1E4X2;P25425-8;P25425-12;P25425;P25425-5;P25425-2;F8VQL7;P25425-6;P25425-11;P25425-9;P25425-4;P25425-10;P25425-7	4;4;4;4;4;4;4;4;4;4;4;4;4;4;4;4;4;4;1;1;1;1;1;1;1;1;1;1;1	4;4;4;4;4;4;4;4;4;4;4;4;4;4;4;4;4;4;1;1;1;1;1;1;1;1;1;1;1	4;4;4;4;4;4;4;4;4;4;4;4;4;4;4;4;4;4;1;1;1;1;1;1;1;1;1;1;1	POU domain, class 2, transcription factor 1;POU domain protein	Pou2f1	tr|A0A0R4J1Z4|A0A0R4J1Z4_MOUSE POU domain protein OS=Mus musculus OX=10090 GN=Pou2f1 PE=1 SV=1;sp|P25425-3|PO2F1_MOUSE Isoform 3 of POU domain, class 2, transcription factor 1 OS=Mus musculus OX=10090 GN=Pou2f1;tr|E9Q6Z8|E9Q6Z8_MOUSE POU domain protein OS=	29	4	4	4	3	3	4	3	3	3	3	3	4	3	3	3	3	3	4	3	3	3	9.7	9.7	9.7	81.609	793	793;701;769;758;580;706;701;792;770;758;746;782;746;650;647;608;522;641;400;583;549;485;419;479;463;431;424;467;431	4.09	5	6	3	14	5	0	81.874	By MS/MS	By MS/MS	By MS/MS	By MS/MS	By MS/MS	By MS/MS
A0A0A0MQE5;A2AHC3;A2AHC4;A2AHC3-2;V9GXT0	A0A0A0MQE5;A2AHC3	9;8;3;3;1	9;8;3;3;1	9;8;3;3;1	Calmodulin-regulated spectrin-associated protein 1	Camsap1	tr|A0A0A0MQE5|A0A0A0MQE5_MOUSE Calmodulin-regulated spectrin-associated protein 1 OS=Mus musculus OX=10090 GN=Camsap1 PE=1 SV=1;sp|A2AHC3|CAMP1_MOUSE Calmodulin-regulated spectrin-associated protein 1 OS=Mus musculus OX=10090 GN=Camsap1 PE=1 SV=1	5	9	9	9	7	7	5	7	6	5	7	7	5	7	6	5	7	7	5	7	6	5	6.8	6.8	6.8	176.01	1582	1582;1581;1077;1082;73	3.42	8	7	22	6		0	27.447	By MS/MS	By MS/MS	By MS/MS	By MS/MS	By MS/MS	By MS/MS
A0A0A0MQF6;P16858;A0A1D5RLD8;S4R257;S4R1W8;V9GXA7;S4R1N5;V9GXK0	A0A0A0MQF6;P16858;A0A1D5RLD8;S4R257	25;25;22;20;3;2;1;1	25;25;22;20;3;2;1;1	3;3;1;3;0;1;0;0	Glyceraldehyde-3-phosphate dehydrogenase	Gapdh	tr|A0A0A0MQF6|A0A0A0MQF6_MOUSE Glyceraldehyde-3-phosphate dehydrogenase OS=Mus musculus OX=10090 GN=Gapdh PE=1 SV=1;sp|P16858|G3P_MOUSE Glyceraldehyde-3-phosphate dehydrogenase OS=Mus musculus OX=10090 GN=Gapdh PE=1 SV=2;tr|A0A1D5RLD8|A0A1D5RLD8_MOUSE Glyc	8	25	25	3	24	22	22	24	20	25	24	22	22	24	20	25	3	3	3	3	3	3	68.2	68.2	11.4	38.653	359	359;333;333;280;55;121;57;151	3.62	346	124	177	157	293	0	323.31	By MS/MS	By MS/MS	By MS/MS	By MS/MS	By MS/MS	By MS/MS
A0A0A0MQH5	A0A0A0MQH5	10	1	1		Macf1	tr|A0A0A0MQH5|A0A0A0MQH5_MOUSE Microtubule-actin cross-linking factor 1 (Fragment) OS=Mus musculus OX=10090 GN=Macf1 PE=1 SV=6	1	10	1	1	9	7	7	6	6	7	1	1	1	1	1	1	1	1	1	1	1	1	39.6	5.4	5.4	42.736	369	369	2.88	4		1	3		0	5.6616	By MS/MS	By MS/MS	By MS/MS	By MS/MS	By MS/MS	By MS/MS
E0CY47;H3BKE1;A0A0A0MQM2;I1E4X4;H3BKK4;I1E4X6;Q4KWH5-4;Q4KWH5-3;Q4KWH5-2;Q4KWH5	E0CY47;H3BKE1;A0A0A0MQM2;I1E4X4;H3BKK4;I1E4X6;Q4KWH5-4;Q4KWH5-3;Q4KWH5-2;Q4KWH5	1;1;1;1;1;1;1;1;1;1	1;1;1;1;1;1;1;1;1;1	1;1;1;1;1;1;1;1;1;1	Phosphoinositide phospholipase C;1-phosphatidylinositol 4,5-bisphosphate phosphodiesterase eta-1	Plch1	tr|E0CY47|E0CY47_MOUSE 1-phosphatidylinositol 4,5-bisphosphate phosphodiesterase eta-1 (Fragment) OS=Mus musculus OX=10090 GN=Plch1 PE=4 SV=2;tr|H3BKE1|H3BKE1_MOUSE Phosphoinositide phospholipase C (Fragment) OS=Mus musculus OX=10090 GN=Plch1 PE=1 SV=8;tr|	10	1	1	1	1	1	1	1	1	1	1	1	1	1	1	1	1	1	1	1	1	1	5.9	5.9	5.9	16.125	135	135;968;1073;1643;1673;1681;1003;1073;1640;1682	3.87	6		6	7	4	0.0093248	1.98	By MS/MS	By MS/MS	By MS/MS	By MS/MS	By MS/MS	By MS/MS
A0A0A0MQN1;Q5RL79	A0A0A0MQN1;Q5RL79	1;1	1;1	1;1	Keratinocyte-associated protein 2	Krtcap2	tr|A0A0A0MQN1|A0A0A0MQN1_MOUSE Keratinocyte associated protein 2, isoform CRA_c OS=Mus musculus OX=10090 GN=Krtcap2 PE=1 SV=1;sp|Q5RL79|KTAP2_MOUSE Keratinocyte-associated protein 2 OS=Mus musculus OX=10090 GN=Krtcap2 PE=1 SV=2	2	1	1	1	1	1	1	1	1	1	1	1	1	1	1	1	1	1	1	1	1	1	14.9	14.9	14.9	12.542	114	114;136	4			6			0.00020881	4.7013	By MS/MS	By MS/MS	By MS/MS	By MS/MS	By MS/MS	By MS/MS
A0A0A6YVS2;Q921L3	A0A0A6YVS2;Q921L3	1;1	1;1	1;1	Transmembrane and coiled-coil domain-containing protein 1	Tmco1	tr|A0A0A6YVS2|A0A0A6YVS2_MOUSE Calcium load-activated calcium channel (Fragment) OS=Mus musculus OX=10090 GN=Tmco1 PE=1 SV=1;sp|Q921L3|TMCO1_MOUSE Calcium load-activated calcium channel OS=Mus musculus OX=10090 GN=Tmco1 PE=1 SV=1	2	1	1	1	1	1	1	1	1	1	1	1	1	1	1	1	1	1	1	1	1	1	7	7	7	22.283	200	200;188	2.36	6		5			0.00040725	4.2897	By MS/MS	By MS/MS	By MS/MS	By MS/MS	By MS/MS	By MS/MS
Q9JKV1;A0A0A6YVU8;D3YUD8	Q9JKV1;A0A0A6YVU8;D3YUD8	4;4;2	4;4;2	4;4;2	Proteasomal ubiquitin receptor ADRM1	Adrm1;Gm9774	sp|Q9JKV1|ADRM1_MOUSE Proteasomal ubiquitin receptor ADRM1 OS=Mus musculus OX=10090 GN=Adrm1 PE=1 SV=2;tr|A0A0A6YVU8|A0A0A6YVU8_MOUSE MCG119397 OS=Mus musculus OX=10090 GN=Gm9774 PE=4 SV=1;tr|D3YUD8|D3YUD8_MOUSE Predicted pseudogene 9774 OS=Mus musculus OX	3	4	4	4	4	3	3	4	2	4	4	3	3	4	2	4	4	3	3	4	2	4	16.5	16.5	16.5	42.06	407	407;407;309	3.33	14	3	9	7	6	0	23.466	By MS/MS	By MS/MS	By MS/MS	By MS/MS	By MS/MS	By MS/MS
A0A0A6YVV4;A0A0A6YXJ3;Q3TRR0;A0A0A6YVR4;Q3TRR0-2	A0A0A6YVV4;A0A0A6YXJ3;Q3TRR0;A0A0A6YVR4;Q3TRR0-2	2;2;2;1;1	2;2;2;1;1	2;2;2;1;1	Microtubule-associated protein 9	Map9	tr|A0A0A6YVV4|A0A0A6YVV4_MOUSE Microtubule-associated protein 9 (Fragment) OS=Mus musculus OX=10090 GN=Map9 PE=1 SV=1;tr|A0A0A6YXJ3|A0A0A6YXJ3_MOUSE Microtubule-associated protein 9 (Fragment) OS=Mus musculus OX=10090 GN=Map9 PE=1 SV=5;sp|Q3TRR0|MAP9_MOUSE	5	2	2	2	1	0	1	0	1	0	1	0	1	0	1	0	1	0	1	0	1	0	3.5	3.5	3.5	57.528	517	517;538;646;92;616	5				3		0.0054809	2.2788	By matching		By MS/MS		By MS/MS
E9QKR1;A0A0A6YW06;J3QNM3;E9QKQ9;E9QLZ9;Q03173-6;Q03173-3;Q03173-4;Q03173-5;Q03173;A0A0A6YXC8;Q03173-2	E9QKR1;A0A0A6YW06;J3QNM3;E9QKQ9;E9QLZ9;Q03173-6;Q03173-3;Q03173-4;Q03173-5;Q03173;A0A0A6YXC8;Q03173-2	12;12;12;12;12;12;12;12;12;12;11;6	12;12;12;12;12;12;12;12;12;12;11;6	11;11;11;11;11;11;11;11;11;11;11;6	Protein enabled homolog	Enah	tr|E9QKR1|E9QKR1_MOUSE Protein enabled homolog OS=Mus musculus OX=10090 GN=Enah PE=1 SV=2;tr|A0A0A6YW06|A0A0A6YW06_MOUSE Protein enabled homolog OS=Mus musculus OX=10090 GN=Enah PE=1 SV=1;tr|J3QNM3|J3QNM3_MOUSE Protein enabled homolog OS=Mus musculus OX=10	12	12	12	11	12	7	9	9	6	7	12	7	9	9	6	7	11	7	9	9	6	7	29.5	29.5	27.9	62.24	562	562;785;789;789;804;507;541;783;787;802;524;390	3.71	30	15	7	38	18	0	87.112	By MS/MS	By MS/MS	By MS/MS	By MS/MS	By MS/MS	By MS/MS
A0A0A6YW28;P35123;A0A0A6YVY7;A0A0A6YWM7;A0A0A6YW63	A0A0A6YW28;P35123;A0A0A6YVY7	18;18;13;6;4	16;16;12;6;4	16;16;12;6;4	Ubiquitin carboxyl-terminal hydrolase;Ubiquitin carboxyl-terminal hydrolase 4	Usp4	tr|A0A0A6YW28|A0A0A6YW28_MOUSE Ubiquitin carboxyl-terminal hydrolase OS=Mus musculus OX=10090 GN=Usp4 PE=1 SV=1;sp|P35123|UBP4_MOUSE Ubiquitin carboxyl-terminal hydrolase 4 OS=Mus musculus OX=10090 GN=Usp4 PE=1 SV=3;tr|A0A0A6YVY7|A0A0A6YVY7_MOUSE Ubiquitin	5	18	16	16	17	14	15	11	12	9	15	12	13	10	11	7	15	12	13	10	11	7	25.2	23.2	23.2	103.72	915	915;962;734;394;190	4.16	20	9	30	23	32	0	78.278	By MS/MS	By MS/MS	By MS/MS	By MS/MS	By MS/MS	By MS/MS
A0A0A6YWB3;Q3TFK5-2;Q3TFK5	A0A0A6YWB3;Q3TFK5-2;Q3TFK5	7;7;7	7;7;7	7;7;7	G patch domain-containing protein 4	Gpatch4	tr|A0A0A6YWB3|A0A0A6YWB3_MOUSE G patch domain-containing protein 4 (Fragment) OS=Mus musculus OX=10090 GN=Gpatch4 PE=1 SV=1;sp|Q3TFK5-2|GPTC4_MOUSE Isoform 2 of G patch domain-containing protein 4 OS=Mus musculus OX=10090 GN=Gpatch4;sp|Q3TFK5|GPTC4_MOUSE G	3	7	7	7	5	4	6	4	3	5	5	4	6	4	3	5	5	4	6	4	3	5	27.2	27.2	27.2	26.538	239	239;328;415	3.4	11	12	15	4	6	0	15.689	By MS/MS	By MS/MS	By MS/MS	By MS/MS	By MS/MS	By MS/MS
A0A0A6YWH2;Q9EQX4	A0A0A6YWH2;Q9EQX4	4;4	4;4	4;4	Allograft inflammatory factor 1-like	Aif1l	tr|A0A0A6YWH2|A0A0A6YWH2_MOUSE Allograft inflammatory factor 1-like OS=Mus musculus OX=10090 GN=Aif1l PE=1 SV=1;sp|Q9EQX4|AIF1L_MOUSE Allograft inflammatory factor 1-like OS=Mus musculus OX=10090 GN=Aif1l PE=1 SV=1	2	4	4	4	4	3	3	4	3	3	4	3	3	4	3	3	4	3	3	4	3	3	30.1	30.1	30.1	15.311	136	136;150	4.48	12		8	17	24	0	15.25	By MS/MS	By MS/MS	By MS/MS	By MS/MS	By MS/MS	By MS/MS
A0A0A6YWM5;E9QKE4;Q8BMG7;Q8BMG7-2	A0A0A6YWM5;E9QKE4;Q8BMG7	9;9;9;2	9;9;9;2	9;9;9;2	Rab3 GTPase-activating protein non-catalytic subunit	Rab3gap2	tr|A0A0A6YWM5|A0A0A6YWM5_MOUSE Rab3 GTPase-activating protein non-catalytic subunit OS=Mus musculus OX=10090 GN=Rab3gap2 PE=1 SV=1;tr|E9QKE4|E9QKE4_MOUSE Rab3 GTPase-activating protein non-catalytic subunit OS=Mus musculus OX=10090 GN=Rab3gap2 PE=1 SV=1;sp	4	9	9	9	7	6	6	7	6	5	7	6	6	7	6	5	7	6	6	7	6	5	7.8	7.8	7.8	152.54	1367	1367;1387;1366;298	4.58	4	5	15	6	20	0	50.962	By MS/MS	By MS/MS	By MS/MS	By MS/MS	By MS/MS	By MS/MS
B2RUE8;A0A0A6YWM8	B2RUE8;A0A0A6YWM8	10;10	10;10	1;1		Map4k4	tr|B2RUE8|B2RUE8_MOUSE Map4k4 protein OS=Mus musculus OX=10090 GN=Map4k4 PE=1 SV=1;tr|A0A0A6YWM8|A0A0A6YWM8_MOUSE Mitogen-activated protein kinase kinase kinase kinase 4 OS=Mus musculus OX=10090 GN=Map4k4 PE=1 SV=1	2	10	10	1	7	5	7	7	4	8	7	5	7	7	4	8	1	0	1	1	1	1	10.4	10.4	1.2	139.06	1221	1221;1272	3.71	10	19	1	10	12	0	25.861	By MS/MS	By MS/MS	By MS/MS	By MS/MS	By MS/MS	By MS/MS
A0A0A6YWX1;J3KMM1;E9Q9M5;Q3UJD6-2;Q3UJD6;A0A0A6YWN9;A0A0A6YXT9;A0A0A6YX42	A0A0A6YWX1;J3KMM1;E9Q9M5;Q3UJD6-2;Q3UJD6;A0A0A6YWN9	11;11;10;10;10;7;3;2	11;11;10;10;10;7;3;2	11;11;10;10;10;7;3;2	Ubiquitin carboxyl-terminal hydrolase;Ubiquitin carboxyl-terminal hydrolase 19	Usp19	tr|A0A0A6YWX1|A0A0A6YWX1_MOUSE Ubiquitin carboxyl-terminal hydrolase 19 OS=Mus musculus OX=10090 GN=Usp19 PE=1 SV=1;tr|J3KMM1|J3KMM1_MOUSE Ubiquitin carboxyl-terminal hydrolase 19 OS=Mus musculus OX=10090 GN=Usp19 PE=1 SV=1;tr|E9Q9M5|E9Q9M5_MOUSE Ubiquitin	8	11	11	11	10	8	10	9	8	6	10	8	10	9	8	6	10	8	10	9	8	6	13.2	13.2	13.2	146.28	1322	1322;1324;1299;1323;1360;991;128;295	4.32	5	8	18	16	13	0	33.699	By MS/MS	By MS/MS	By MS/MS	By MS/MS	By MS/MS	By MS/MS
A0A0A6YX02;Q9CQ22	A0A0A6YX02;Q9CQ22	6;6	6;6	6;6	Ragulator complex protein LAMTOR1	Lamtor1	tr|A0A0A6YX02|A0A0A6YX02_MOUSE Ragulator complex protein LAMTOR1 OS=Mus musculus OX=10090 GN=Lamtor1 PE=1 SV=1;sp|Q9CQ22|LTOR1_MOUSE Ragulator complex protein LAMTOR1 OS=Mus musculus OX=10090 GN=Lamtor1 PE=1 SV=1	2	6	6	6	5	4	4	5	3	4	5	4	4	5	3	4	5	4	4	5	3	4	54.9	54.9	54.9	15.738	142	142;161	3.66	14		12	2	13	0	59.395	By MS/MS	By MS/MS	By MS/MS	By MS/MS	By MS/MS	By MS/MS
A0A0A6YX18;Q8BVE3;A0A0A6YWP6;A0A0A6YVU0;A0A0A6YW86	A0A0A6YX18;Q8BVE3;A0A0A6YWP6	6;6;5;2;1	6;6;5;2;1	6;6;5;2;1	V-type proton ATPase subunit H	Atp6v1h	tr|A0A0A6YX18|A0A0A6YX18_MOUSE V-type proton ATPase subunit H OS=Mus musculus OX=10090 GN=Atp6v1h PE=1 SV=1;sp|Q8BVE3|VATH_MOUSE V-type proton ATPase subunit H OS=Mus musculus OX=10090 GN=Atp6v1h PE=1 SV=1;tr|A0A0A6YWP6|A0A0A6YWP6_MOUSE V-type proton ATPas	5	6	6	6	6	5	6	6	6	6	6	5	6	6	6	6	6	5	6	6	6	6	15.9	15.9	15.9	54.108	465	465;483;441;140;77	3.28	27	18	11	4	19	0	113.74	By MS/MS	By MS/MS	By MS/MS	By MS/MS	By MS/MS	By MS/MS
A0A0A6YX40;Q6ZQA6	A0A0A6YX40;Q6ZQA6	2;2	2;2	2;2	Immunoglobulin superfamily member 3	Igsf3	tr|A0A0A6YX40|A0A0A6YX40_MOUSE Immunoglobulin superfamily member 3 OS=Mus musculus OX=10090 GN=Igsf3 PE=1 SV=1;sp|Q6ZQA6|IGSF3_MOUSE Immunoglobulin superfamily member 3 OS=Mus musculus OX=10090 GN=Igsf3 PE=1 SV=2	2	2	2	2	1	0	1	0	0	1	1	0	1	0	0	1	1	0	1	0	0	1	1.9	1.9	1.9	137.03	1214	1214;1194	5.33				2	1	0.0053191	2.3086	By MS/MS		By MS/MS			By matching
A0A0A6YX50;P51175	A0A0A6YX50;P51175	1;1	1;1	1;1	Protoporphyrinogen oxidase	Ppox	tr|A0A0A6YX50|A0A0A6YX50_MOUSE Protoporphyrinogen oxidase (Fragment) OS=Mus musculus OX=10090 GN=Ppox PE=1 SV=1;sp|P51175|PPOX_MOUSE Protoporphyrinogen oxidase OS=Mus musculus OX=10090 GN=Ppox PE=1 SV=1	2	1	1	1	1	1	0	1	1	1	1	1	0	1	1	1	1	1	0	1	1	1	6.2	6.2	6.2	41.247	389	389;477	4.8			1	4		0.0020515	2.9278	By matching	By MS/MS		By MS/MS	By MS/MS	By MS/MS
A0A0A6YX73;Q8K1M3;P12367;A0A0A6YY28;H3BK84;P31324	A0A0A6YX73;Q8K1M3;P12367	9;9;8;4;2;2	9;9;8;4;2;2	9;9;8;4;2;2	cAMP-dependent protein kinase type II-alpha regulatory subunit	Prkar2a	tr|A0A0A6YX73|A0A0A6YX73_MOUSE cAMP-dependent protein kinase type II-alpha regulatory subunit OS=Mus musculus OX=10090 GN=Prkar2a PE=1 SV=1;tr|Q8K1M3|Q8K1M3_MOUSE Protein kinase, cAMP dependent regulatory, type II alpha OS=Mus musculus OX=10090 GN=Prkar2a	6	9	9	9	7	4	7	4	7	5	7	4	7	4	7	5	7	4	7	4	7	5	28.7	28.7	28.7	43.165	380	380;402;401;200;256;416	4.13	11	6	7	10	18	0	18.933	By MS/MS	By MS/MS	By MS/MS	By MS/MS	By MS/MS	By MS/MS
A0A0A6YX96;A2AK70;P48760-2;P48760-5;P48760-4;P48760;P48760-3	A0A0A6YX96;A2AK70;P48760-2;P48760-5;P48760-4;P48760;P48760-3	1;1;1;1;1;1;1	1;1;1;1;1;1;1	1;1;1;1;1;1;1	Folylpolyglutamate synthase, mitochondrial	Fpgs	tr|A0A0A6YX96|A0A0A6YX96_MOUSE Folylpolyglutamate synthase, mitochondrial OS=Mus musculus OX=10090 GN=Fpgs PE=1 SV=1;tr|A2AK70|A2AK70_MOUSE Folylpolyglutamate synthase, mitochondrial (Fragment) OS=Mus musculus OX=10090 GN=Fpgs PE=1 SV=1;sp|P48760-2|FOLC_MO	7	1	1	1	1	1	1	1	1	1	1	1	1	1	1	1	1	1	1	1	1	1	8.5	8.5	8.5	21.499	189	189;243;545;560;583;587;591	3.57	1		6			0	66.747	By MS/MS	By MS/MS	By MS/MS	By MS/MS	By MS/MS	By MS/MS
A0A0A6YXG0;Q9JKK1-2;Q9JKK1	A0A0A6YXG0;Q9JKK1-2;Q9JKK1	2;2;2	2;2;2	2;2;2	Syntaxin-6	Stx6	tr|A0A0A6YXG0|A0A0A6YXG0_MOUSE Syntaxin-6 OS=Mus musculus OX=10090 GN=Stx6 PE=1 SV=1;sp|Q9JKK1-2|STX6_MOUSE Isoform 2 of Syntaxin-6 OS=Mus musculus OX=10090 GN=Stx6;sp|Q9JKK1|STX6_MOUSE Syntaxin-6 OS=Mus musculus OX=10090 GN=Stx6 PE=1 SV=1	3	2	2	2	1	1	1	1	1	2	1	1	1	1	1	2	1	1	1	1	1	2	13.1	13.1	13.1	22.569	199	199;255;255	4.86			4		3	0.00060012	3.9692	By MS/MS	By MS/MS	By MS/MS	By MS/MS	By MS/MS	By MS/MS
F6UHR6;E9PXZ2;A0A0A6YXH3;A2A8Z1;Q5FWX7;E9Q6C1;A2A8Z1-2;F8VQE8	F6UHR6;E9PXZ2;A0A0A6YXH3;A2A8Z1;Q5FWX7;E9Q6C1;A2A8Z1-2	5;5;5;5;4;4;4;1	5;5;5;5;4;4;4;1	5;5;5;5;4;4;4;1	Oxysterol-binding protein;Oxysterol-binding protein-related protein 9	Osbpl9	tr|F6UHR6|F6UHR6_MOUSE Oxysterol-binding protein OS=Mus musculus OX=10090 GN=Osbpl9 PE=1 SV=2;tr|E9PXZ2|E9PXZ2_MOUSE Oxysterol-binding protein OS=Mus musculus OX=10090 GN=Osbpl9 PE=1 SV=2;tr|A0A0A6YXH3|A0A0A6YXH3_MOUSE Oxysterol-binding protein OS=Mus musc	8	5	5	5	5	4	3	5	3	4	5	4	3	5	3	4	5	4	3	5	3	4	8.8	8.8	8.8	81.09	719	719;723;746;736;626;656;639;67	3.9	3	14	4		10	0	19.202	By MS/MS	By MS/MS	By MS/MS	By MS/MS	By MS/MS	By MS/MS
A0A1D5RM41;A0A0A6YXX3;A0A0A6YXL6;E9Q3Y4;Q9ESE1-3;Q9ESE1-2;Q9ESE1	A0A1D5RM41;A0A0A6YXX3;A0A0A6YXL6;E9Q3Y4;Q9ESE1-3;Q9ESE1-2;Q9ESE1	5;5;5;5;4;4;4	5;5;5;5;4;4;4	5;5;5;5;4;4;4	Lipopolysaccharide-responsive and beige-like anchor protein	Lrba	tr|A0A1D5RM41|A0A1D5RM41_MOUSE Lipopolysaccharide-responsive and beige-like anchor protein (Fragment) OS=Mus musculus OX=10090 GN=Lrba PE=1 SV=1;tr|A0A0A6YXX3|A0A0A6YXX3_MOUSE Lipopolysaccharide-responsive and beige-like anchor protein OS=Mus musculus OX=1	7	5	5	5	3	1	2	2	3	2	3	1	2	2	3	2	3	1	2	2	3	2	2.5	2.5	2.5	234.22	2124	2124;2577;2790;2854;2579;2792;2856	4.5		5	1	4	4	0	17.733	By MS/MS	By MS/MS	By MS/MS	By MS/MS	By MS/MS	By MS/MS
A0A0A6YXR4;P47199;D3YUG9;V9GXY8;D3YWU6;D3Z4Q4;D3Z2X0;A0A0A6YVS7	A0A0A6YXR4;P47199;D3YUG9;V9GXY8;D3YWU6;D3Z4Q4;D3Z2X0	5;5;4;4;3;3;3;2	5;5;4;4;3;3;3;2	5;5;4;4;3;3;3;2	Quinone oxidoreductase	Cryz	tr|A0A0A6YXR4|A0A0A6YXR4_MOUSE Quinone oxidoreductase (Fragment) OS=Mus musculus OX=10090 GN=Cryz PE=1 SV=5;sp|P47199|QOR_MOUSE Quinone oxidoreductase OS=Mus musculus OX=10090 GN=Cryz PE=1 SV=1;tr|D3YUG9|D3YUG9_MOUSE Quinone oxidoreductase (Fragment) OS=Mu	8	5	5	5	4	4	4	4	3	3	4	4	4	4	3	3	4	4	4	4	3	3	30.2	30.2	30.2	32.079	301	301;331;173;223;97;137;152;171	3.86	16		1	12	15	0	23.426	By MS/MS	By MS/MS	By MS/MS	By MS/MS	By MS/MS	By MS/MS
A0A0A6YXT4;H7BX26;Q6A065	A0A0A6YXT4;H7BX26;Q6A065	1;1;1	1;1;1	1;1;1	Centrosomal protein of 170 kDa	Cep170	tr|A0A0A6YXT4|A0A0A6YXT4_MOUSE Centrosomal protein of 170 kDa (Fragment) OS=Mus musculus OX=10090 GN=Cep170 PE=1 SV=1;tr|H7BX26|H7BX26_MOUSE Centrosomal protein of 170 kDa OS=Mus musculus OX=10090 GN=Cep170 PE=1 SV=1;sp|Q6A065|CE170_MOUSE Centrosomal prote	3	1	1	1	1	0	1	0	0	0	1	0	1	0	0	0	1	0	1	0	0	0	12	12	12	17.281	158	158;1578;1588	4			2			0.00060374	4.0748	By MS/MS		By MS/MS
A2APZ2;A0A0A6YXY1;A2APZ3;Q8R2U4;A0A0A6YX97;A0A0A6YVQ9	A2APZ2;A0A0A6YXY1;A2APZ3;Q8R2U4;A0A0A6YX97	3;3;3;3;2;1	3;3;3;3;2;1	3;3;3;3;2;1	N-terminal Xaa-Pro-Lys N-methyltransferase 1;N-terminal Xaa-Pro-Lys N-methyltransferase 1, N-terminally processed	Ntmt1	tr|A2APZ2|A2APZ2_MOUSE N-terminal Xaa-Pro-Lys N-methyltransferase 1 (Fragment) OS=Mus musculus OX=10090 GN=Ntmt1 PE=1 SV=1;tr|A0A0A6YXY1|A0A0A6YXY1_MOUSE N-terminal Xaa-Pro-Lys N-methyltransferase 1 (Fragment) OS=Mus musculus OX=10090 GN=Ntmt1 PE=1 SV=1;tr	6	3	3	3	3	2	3	2	3	3	3	2	3	2	3	3	3	2	3	2	3	3	34.6	34.6	34.6	8.7128	78	78;118;146;223;144;70	3.54	6	4	6	5	3	0	17.324	By MS/MS	By MS/MS	By MS/MS	By MS/MS	By MS/MS	By MS/MS
A0A0A6YY66;Q8BSN6;O70480	A0A0A6YY66;Q8BSN6;O70480	1;1;1	1;1;1	1;1;1	Vesicle-associated membrane protein 4	Vamp4	tr|A0A0A6YY66|A0A0A6YY66_MOUSE Vesicle-associated membrane protein 4 OS=Mus musculus OX=10090 GN=Vamp4 PE=1 SV=1;tr|Q8BSN6|Q8BSN6_MOUSE Vesicle-associated membrane protein 4 OS=Mus musculus OX=10090 GN=Vamp4 PE=1 SV=1;sp|O70480|VAMP4_MOUSE Vesicle-associat	3	1	1	1	0	0	1	0	0	0	0	0	1	0	0	0	0	0	1	0	0	0	19	19	19	11.346	100	100;141;141	5				1		0.00095566	3.292			By MS/MS
A0A0A6YY67;H7BX08;Q8C1B1;Q8C1B1-2;A0A0A6YXV8	A0A0A6YY67;H7BX08;Q8C1B1;Q8C1B1-2;A0A0A6YXV8	2;2;2;2;1	2;2;2;2;1	2;2;2;2;1	Calmodulin-regulated spectrin-associated protein 2	Camsap2	tr|A0A0A6YY67|A0A0A6YY67_MOUSE Calmodulin-regulated spectrin-associated protein 2 OS=Mus musculus OX=10090 GN=Camsap2 PE=1 SV=1;tr|H7BX08|H7BX08_MOUSE Calmodulin-regulated spectrin-associated protein 2 OS=Mus musculus OX=10090 GN=Camsap2 PE=1 SV=1;sp|Q8C1B	5	2	2	2	2	2	1	2	1	1	2	2	1	2	1	1	2	2	1	2	1	1	1.3	1.3	1.3	165.69	1472	1472;1478;1461;1470;814	6					9	0	5.2485	By MS/MS	By MS/MS	By MS/MS	By MS/MS	By MS/MS	By matching
A0A0A6YY75;Q64735-2;Q64735;A0A0A6YXR6;A0A0A6YVT1;A0A0A6YXN9	A0A0A6YY75;Q64735-2;Q64735;A0A0A6YXR6;A0A0A6YVT1;A0A0A6YXN9	3;3;3;2;2;2	3;3;3;2;2;2	3;3;3;2;2;2	Complement component receptor 1-like protein	Cr1l	tr|A0A0A6YY75|A0A0A6YY75_MOUSE Complement component receptor 1-like protein OS=Mus musculus OX=10090 GN=Cr1l PE=1 SV=1;sp|Q64735-2|CR1L_MOUSE Isoform 2 of Complement component receptor 1-like protein OS=Mus musculus OX=10090 GN=Cr1l;sp|Q64735|CR1L_MOUSE Co	6	3	3	3	1	3	1	3	2	1	1	3	1	3	2	1	1	3	1	3	2	1	7.9	7.9	7.9	48.075	429	429;440;483;164;255;356	4.18	3			5	3	0.00058491	3.5496	By MS/MS	By MS/MS	By MS/MS	By MS/MS	By MS/MS	By matching
A0A0B4J1E2;Q9CSN1	A0A0B4J1E2;Q9CSN1	18;16	18;16	18;16	SNW domain-containing protein 1	Snw1	tr|A0A0B4J1E2|A0A0B4J1E2_MOUSE SNW domain-containing protein 1 OS=Mus musculus OX=10090 GN=Snw1 PE=1 SV=1;sp|Q9CSN1|SNW1_MOUSE SNW domain-containing protein 1 OS=Mus musculus OX=10090 GN=Snw1 PE=1 SV=3	2	18	18	18	15	14	16	15	13	13	15	14	16	15	13	13	15	14	16	15	13	13	38.1	38.1	38.1	61.461	536	536;536	3.37	53	28	14	31	29	0	105.82	By MS/MS	By MS/MS	By MS/MS	By MS/MS	By MS/MS	By MS/MS
D3Z5P5;A0A0B4J1E3;P40694	D3Z5P5;A0A0B4J1E3;P40694	2;2;2	2;2;2	2;2;2	DNA-binding protein SMUBP-2	Ighmbp2	tr|D3Z5P5|D3Z5P5_MOUSE DNA-binding protein SMUBP-2 OS=Mus musculus OX=10090 GN=Ighmbp2 PE=1 SV=1;tr|A0A0B4J1E3|A0A0B4J1E3_MOUSE DNA-binding protein SMUBP-2 OS=Mus musculus OX=10090 GN=Ighmbp2 PE=1 SV=1;sp|P40694|SMBP2_MOUSE DNA-binding protein SMUBP-2 OS=M	3	2	2	2	1	2	2	1	1	2	1	2	2	1	1	2	1	2	2	1	1	2	2.9	2.9	2.9	97.496	885	885;993;993	4.9	1		3		6	0	5.2435	By MS/MS	By MS/MS	By MS/MS	By MS/MS	By MS/MS	By MS/MS
O35343;A0A0B4J1E7;D3YTN1	O35343;A0A0B4J1E7	7;7;2	7;7;2	5;5;1	Importin subunit alpha-3	Kpna4	sp|O35343|IMA3_MOUSE Importin subunit alpha-3 OS=Mus musculus OX=10090 GN=Kpna4 PE=1 SV=1;tr|A0A0B4J1E7|A0A0B4J1E7_MOUSE Importin subunit alpha-3 OS=Mus musculus OX=10090 GN=Kpna4 PE=1 SV=1	3	7	7	5	6	5	4	6	6	4	6	5	4	6	6	4	4	3	2	4	4	2	23.8	23.8	18	57.922	521	521;623;111	3.36	31		15	18	13	0	323.31	By MS/MS	By MS/MS	By MS/MS	By MS/MS	By MS/MS	By MS/MS
A0A0B4J1G5;Q9JHC9-3;Q9JHC9-4;Q9JHC9-2;Q9JHC9	A0A0B4J1G5;Q9JHC9-3;Q9JHC9-4;Q9JHC9-2;Q9JHC9	5;5;5;5;5	5;5;5;5;5	5;5;5;5;5	ETS-related transcription factor Elf-2	Elf2	tr|A0A0B4J1G5|A0A0B4J1G5_MOUSE ETS-related transcription factor Elf-2 OS=Mus musculus OX=10090 GN=Elf2 PE=1 SV=1;sp|Q9JHC9-3|ELF2_MOUSE Isoform 2 of ETS-related transcription factor Elf-2 OS=Mus musculus OX=10090 GN=Elf2;sp|Q9JHC9-4|ELF2_MOUSE Isoform 3 of	5	5	5	5	5	4	2	1	4	2	5	4	2	1	4	2	5	4	2	1	4	2	17.7	17.7	17.7	53.915	504	504;521;533;581;593	5.05			1	16	2	0	21.309	By MS/MS	By MS/MS	By MS/MS	By MS/MS	By MS/MS	By MS/MS
A0A0B4J1L4;D3YYU8;A0A0A0MQG1;D3YYU8-2	A0A0B4J1L4;D3YYU8;A0A0A0MQG1;D3YYU8-2	5;5;4;3	5;5;4;3	5;5;4;3	Obscurin-like protein 1	Obsl1	tr|A0A0B4J1L4|A0A0B4J1L4_MOUSE Obscurin-like protein 1 OS=Mus musculus OX=10090 GN=Obsl1 PE=1 SV=1;sp|D3YYU8|OBSL1_MOUSE Obscurin-like protein 1 OS=Mus musculus OX=10090 GN=Obsl1 PE=1 SV=1;tr|A0A0A0MQG1|A0A0A0MQG1_MOUSE Obscurin-like protein 1 (Fragment) O	4	5	5	5	4	4	5	5	4	5	4	4	5	5	4	5	4	4	5	5	4	5	6.4	6.4	6.4	113.84	1025	1025;1804;1162;526	3.82	8	12		7	11	0	8.8717	By MS/MS	By MS/MS	By MS/MS	By MS/MS	By MS/MS	By MS/MS
A0A0D2X7Z2;Q9CY45	A0A0D2X7Z2;Q9CY45	3;3	3;3	3;3	Protein-lysine N-methyltransferase N6amt2	N6amt2	tr|A0A0D2X7Z2|A0A0D2X7Z2_MOUSE EEF1A lysine methyltransferase 1 OS=Mus musculus OX=10090 GN=Eef1akmt1 PE=1 SV=1;sp|Q9CY45|EFMT1_MOUSE EEF1A lysine methyltransferase 1 OS=Mus musculus OX=10090 GN=Eef1akmt1 PE=1 SV=1	2	3	3	3	3	1	2	1	1	2	3	1	2	1	1	2	3	1	2	1	1	2	14.7	14.7	14.7	25.763	224	224;214	3.83	5		4	6	3	0	35.689	By MS/MS	By MS/MS	By MS/MS	By MS/MS	By MS/MS	By MS/MS
A0A0F6AIX5;Q8BVA5;A0A0F6AIX6;A0A1W2P7C8;Q8BVA5-2;A0A1W2P6L7;A0A1W2P6J8;A0A1W2P7T7;A0A1W2P820;Q8BVA5-3;A0A1W2P818	A0A0F6AIX5;Q8BVA5;A0A0F6AIX6;A0A1W2P7C8;Q8BVA5-2;A0A1W2P6L7	6;6;4;4;4;3;2;2;2;2;1	6;6;4;4;4;3;2;2;2;2;1	6;6;4;4;4;3;2;2;2;2;1	UPF0554 protein C2orf43 homolog		tr|A0A0F6AIX5|A0A0F6AIX5_MOUSE Lipid droplet-associated hydrolase OS=Mus musculus OX=10090 GN=Ldah PE=1 SV=1;sp|Q8BVA5|LDAH_MOUSE Lipid droplet-associated hydrolase OS=Mus musculus OX=10090 GN=Ldah PE=1 SV=1;tr|A0A0F6AIX6|A0A0F6AIX6_MOUSE Lipid droplet-ass	11	6	6	6	5	4	4	5	5	4	5	4	4	5	5	4	5	4	4	5	5	4	19.6	19.6	19.6	37.357	326	326;326;236;272;236;117;114;190;208;156;66	3.69	5	6	12		6	0	14.182	By MS/MS	By MS/MS	By MS/MS	By MS/MS	By MS/MS	By MS/MS
A0A0G2JEQ8;A0A0G2JH16;A0A0G2JFV3;A0A0G2JDE3;A0A0G2JG66;A0A0G2JDF4;A0A0G2JFF5;A0A0G2JDK6;A0A0G2JGM8;Q8JZZ7;Q8JZZ7-2	A0A0G2JEQ8;A0A0G2JH16;A0A0G2JFV3;A0A0G2JDE3;A0A0G2JG66;A0A0G2JDF4;A0A0G2JFF5;A0A0G2JDK6;A0A0G2JGM8;Q8JZZ7;Q8JZZ7-2	6;6;6;6;6;6;6;6;6;6;6	6;6;6;6;6;6;6;6;6;6;6	6;6;6;6;6;6;6;6;6;6;6	Latrophilin-2	Lphn2	tr|A0A0G2JEQ8|A0A0G2JEQ8_MOUSE Adhesion G protein-coupled receptor L2 OS=Mus musculus OX=10090 GN=Adgrl2 PE=1 SV=1;tr|A0A0G2JH16|A0A0G2JH16_MOUSE Adhesion G protein-coupled receptor L2 OS=Mus musculus OX=10090 GN=Adgrl2 PE=1 SV=1;tr|A0A0G2JFV3|A0A0G2JFV3_M	11	6	6	6	4	6	3	1	4	4	4	6	3	1	4	4	4	6	3	1	4	4	5.7	5.7	5.7	126.06	1123	1123;1177;1341;1403;1435;1452;1467;1478;1487;1487;1551	3.52	6	6	3	8	2	0	19.803	By MS/MS	By MS/MS	By MS/MS	By MS/MS	By MS/MS	By MS/MS
A0A0G2JDH4;Q60980	A0A0G2JDH4;Q60980	2;2	2;2	2;2	Krueppel-like factor 3	Klf3	tr|A0A0G2JDH4|A0A0G2JDH4_MOUSE Krueppel-like factor 3 (Fragment) OS=Mus musculus OX=10090 GN=Klf3 PE=1 SV=1;sp|Q60980|KLF3_MOUSE Krueppel-like factor 3 OS=Mus musculus OX=10090 GN=Klf3 PE=1 SV=1	2	2	2	2	2	2	2	2	2	2	2	2	2	2	2	2	2	2	2	2	2	2	24.6	24.6	24.6	15.105	142	142;344	3.69	5		6		5	0	15.24	By MS/MS	By MS/MS	By MS/MS	By MS/MS	By MS/MS	By MS/MS
A0A0G2JDI9;P55096	A0A0G2JDI9;P55096	3;3	3;3	3;3	ATP-binding cassette sub-family D member 3	Abcd3	tr|A0A0G2JDI9|A0A0G2JDI9_MOUSE ATP-binding cassette sub-family D member 3 OS=Mus musculus OX=10090 GN=Abcd3 PE=1 SV=1;sp|P55096|ABCD3_MOUSE ATP-binding cassette sub-family D member 3 OS=Mus musculus OX=10090 GN=Abcd3 PE=1 SV=2	2	3	3	3	3	3	3	3	2	2	3	3	3	3	2	2	3	3	3	3	2	2	9.8	9.8	9.8	62.697	549	549;659	3.5		9	9			0	40.599	By MS/MS	By MS/MS	By MS/MS	By MS/MS	By MS/MS	By matching
A0A0H2UKB7;A0A0G2JF44;A0A0G2JDJ1;Q9DAI2	A0A0H2UKB7;A0A0G2JF44;A0A0G2JDJ1;Q9DAI2	1;1;1;1	1;1;1;1	1;1;1;1	Intraflagellar transport protein 22 homolog	Ift22	tr|A0A0H2UKB7|A0A0H2UKB7_MOUSE Intraflagellar transport protein 22 homolog (Fragment) OS=Mus musculus OX=10090 GN=Ift22 PE=1 SV=1;tr|A0A0G2JF44|A0A0G2JF44_MOUSE Intraflagellar transport protein 22 homolog (Fragment) OS=Mus musculus OX=10090 GN=Ift22 PE=1 S	4	1	1	1	1	1	1	1	1	1	1	1	1	1	1	1	1	1	1	1	1	1	11.3	11.3	11.3	10.422	97	97;155;176;185	5.45				6	5	0.0081867	2.0699	By MS/MS	By MS/MS	By MS/MS	By MS/MS	By MS/MS	By MS/MS
A0A0G2JDK3;A0A0G2JGU4;Q9JIF6;A0A0G2JG79;Q3TVF4;P53612;Q6PFA1;A0A0G2JF29	A0A0G2JDK3;A0A0G2JGU4;Q9JIF6;A0A0G2JG79;Q3TVF4;P53612;Q6PFA1;A0A0G2JF29	2;2;2;2;2;2;1;1	2;2;2;2;2;2;1;1	2;2;2;2;2;2;1;1	Geranylgeranyl transferase type-2 subunit beta	Rabggtb	tr|A0A0G2JDK3|A0A0G2JDK3_MOUSE Geranylgeranyl transferase type-2 subunit beta (Fragment) OS=Mus musculus OX=10090 GN=Rabggtb PE=1 SV=1;tr|A0A0G2JGU4|A0A0G2JGU4_MOUSE Geranylgeranyl transferase type-2 subunit beta (Fragment) OS=Mus musculus OX=10090 GN=Rabg	8	2	2	2	1	1	1	1	1	2	1	1	1	1	1	2	1	1	1	1	1	2	14.1	14.1	14.1	16.519	149	149;152;153;205;331;339;132;162	2.15	6	6	1			0.00021169	4.9459	By MS/MS	By MS/MS	By MS/MS	By MS/MS	By MS/MS	By MS/MS
A0A0G2JDL3;P49615	A0A0G2JDL3;P49615	6;6	5;5	5;5	Cyclin-dependent-like kinase 5	Cdk5	tr|A0A0G2JDL3|A0A0G2JDL3_MOUSE Cyclin-dependent-like kinase 5 OS=Mus musculus OX=10090 GN=Cdk5 PE=1 SV=1;sp|P49615|CDK5_MOUSE Cyclin-dependent-like kinase 5 OS=Mus musculus OX=10090 GN=Cdk5 PE=1 SV=1	2	6	5	5	4	5	6	6	6	5	3	4	5	5	5	4	3	4	5	5	5	4	32.7	29.6	29.6	29.528	260	260;292	4.4	4	6		10	10	0	14.49	By MS/MS	By MS/MS	By MS/MS	By MS/MS	By MS/MS	By MS/MS
A0A0G2JE03;Q3TWF7;A0A0G2JDM7;Q8BTZ4-2;Q8BTZ4;A0A0G2JDE8;A0A0G2JFH0;A0A0G2JF12;A0A0G2JGE5	A0A0G2JE03;Q3TWF7;A0A0G2JDM7;Q8BTZ4-2;Q8BTZ4;A0A0G2JDE8;A0A0G2JFH0	9;9;9;9;9;7;6;2;1	9;9;9;9;9;7;6;2;1	9;9;9;9;9;7;6;2;1	Anaphase-promoting complex subunit 5	Anapc5	tr|A0A0G2JE03|A0A0G2JE03_MOUSE Anaphase-promoting complex subunit 5 OS=Mus musculus OX=10090 GN=Anapc5 PE=1 SV=1;tr|Q3TWF7|Q3TWF7_MOUSE Anaphase-promoting complex subunit 5 OS=Mus musculus OX=10090 GN=Anapc5 PE=1 SV=1;tr|A0A0G2JDM7|A0A0G2JDM7_MOUSE Anaphas	9	9	9	9	5	5	4	7	6	6	5	5	4	7	6	6	5	5	4	7	6	6	14.7	14.7	14.7	80.831	719	719;732;732;727;740;656;407;95;68	3.85	11	2	12	14	7	0	31.363	By MS/MS	By MS/MS	By MS/MS	By MS/MS	By MS/MS	By MS/MS
A0A0G2JE46;A0A0G2JDP0;O35387;A0A0G2JGR0;A0A0G2JEE6;A0A0G2JFF9	A0A0G2JE46;A0A0G2JDP0;O35387;A0A0G2JGR0;A0A0G2JEE6;A0A0G2JFF9	2;2;2;1;1;1	2;2;2;1;1;1	2;2;2;1;1;1	HCLS1-associated protein X-1	Hax1	tr|A0A0G2JE46|A0A0G2JE46_MOUSE HCLS1-associated protein X-1 OS=Mus musculus OX=10090 GN=Hax1 PE=1 SV=1;tr|A0A0G2JDP0|A0A0G2JDP0_MOUSE HCLS1-associated protein X-1 OS=Mus musculus OX=10090 GN=Hax1 PE=1 SV=1;sp|O35387|HAX1_MOUSE HCLS1-associated protein X-1	6	2	2	2	2	2	2	2	1	2	2	2	2	2	1	2	2	2	2	2	1	2	14.8	14.8	14.8	22.221	196	196;277;280;36;151;254	1.91	6	5				0	26.375	By MS/MS	By MS/MS	By MS/MS	By MS/MS	By matching	By MS/MS
A0A0G2JDU2;O54992-4;O54992-3;O54992-2;O54992-5;O54992;A0A0G2JDF3	A0A0G2JDU2;O54992-4;O54992-3;O54992-2;O54992-5;O54992;A0A0G2JDF3	2;2;2;2;2;2;1	2;2;2;2;2;2;1	2;2;2;2;2;2;1	MAP kinase-activated protein kinase 5	Mapkapk5	tr|A0A0G2JDU2|A0A0G2JDU2_MOUSE Predicted gene 42878 OS=Mus musculus OX=10090 GN=Gm42878 PE=4 SV=1;sp|O54992-4|MAPK5_MOUSE Isoform 4 of MAP kinase-activated protein kinase 5 OS=Mus musculus OX=10090 GN=Mapkapk5;sp|O54992-3|MAPK5_MOUSE Isoform 3 of MAP kinas	7	2	2	2	2	1	2	2	2	1	2	1	2	2	2	1	2	1	2	2	2	1	4.9	4.9	4.9	53.955	471	471;322;324;409;471;473;187	4.6			4	6		0.00060193	4.0154	By MS/MS	By MS/MS	By MS/MS	By MS/MS	By MS/MS	By MS/MS
A0A0G2JDW2;P09542;A0A087WRZ7;A0A0G2JDM3;E9PWG4;P05977-2;P05977	A0A0G2JDW2;P09542;A0A087WRZ7;A0A0G2JDM3;E9PWG4;P05977-2;P05977	2;2;1;1;1;1;1	2;2;1;1;1;1;1	2;2;1;1;1;1;1	Myosin light chain 3;Myosin light chain 1/3, skeletal muscle isoform	Myl3;Myl1	tr|A0A0G2JDW2|A0A0G2JDW2_MOUSE Myosin light chain 3 (Fragment) OS=Mus musculus OX=10090 GN=Myl3 PE=1 SV=1;sp|P09542|MYL3_MOUSE Myosin light chain 3 OS=Mus musculus OX=10090 GN=Myl3 PE=1 SV=4;tr|A0A087WRZ7|A0A087WRZ7_MOUSE Myosin light chain 1/3, skeletal m	7	2	2	2	2	2	2	1	2	1	2	2	2	1	2	1	2	2	2	1	2	1	19	19	19	20.183	184	184;204;92;127;161;150;188	3.18	6	3	10	3		0	9.5855	By MS/MS	By MS/MS	By MS/MS	By MS/MS	By MS/MS	By MS/MS
A0A0G2JDW7;Q6ZWU9;A0A0G2JG29;A0A0G2JEX7	A0A0G2JDW7;Q6ZWU9;A0A0G2JG29	5;5;3;2	1;1;1;0	1;1;1;0	40S ribosomal protein S27	Rps27	tr|A0A0G2JDW7|A0A0G2JDW7_MOUSE 40S ribosomal protein S27 (Fragment) OS=Mus musculus OX=10090 GN=Rps27 PE=1 SV=1;sp|Q6ZWU9|RS27_MOUSE 40S ribosomal protein S27 OS=Mus musculus OX=10090 GN=Rps27 PE=1 SV=3;tr|A0A0G2JG29|A0A0G2JG29_MOUSE 40S ribosomal protein	4	5	1	1	5	5	5	5	5	5	1	1	1	1	1	1	1	1	1	1	1	1	42.7	13.4	13.4	9.2327	82	82;84;83;52	2.5	12		12			0	30.693	By MS/MS	By MS/MS	By MS/MS	By MS/MS	By MS/MS	By MS/MS
A0A0G2JEB8;A0A2I3BQK2;A0A2I3BPU1;A0A0G2JE10;A0A2I3BQX2;Q9Z1K8	A0A0G2JEB8;A0A2I3BQK2;A0A2I3BPU1;A0A0G2JE10;A0A2I3BQX2;Q9Z1K8	1;1;1;1;1;1	1;1;1;1;1;1	1;1;1;1;1;1	Y+L amino acid transporter 1	Slc7a7	tr|A0A0G2JEB8|A0A0G2JEB8_MOUSE Y+L amino acid transporter 1 (Fragment) OS=Mus musculus OX=10090 GN=Slc7a7 PE=1 SV=1;tr|A0A2I3BQK2|A0A2I3BQK2_MOUSE Y+L amino acid transporter 1 (Fragment) OS=Mus musculus OX=10090 GN=Slc7a7 PE=1 SV=1;tr|A0A2I3BPU1|A0A2I3BPU1	6	1	1	1	1	1	1	1	1	1	1	1	1	1	1	1	1	1	1	1	1	1	45.8	45.8	45.8	6.0629	59	59;156;167;186;209;510	3		6				0	10.013	By MS/MS	By MS/MS	By MS/MS	By MS/MS	By MS/MS	By MS/MS
A0A0G2JE25;A0A0G2JGP4;Q9D091;P08556;A0A0G2JGM2;C0H5X4;B2KGV5;E9Q8V2;E9PVD5;A0A0N4SVY1	A0A0G2JE25;A0A0G2JGP4;Q9D091;P08556	5;5;5;5;2;2;1;1;1;1	2;2;2;2;0;0;0;0;0;0	1;1;1;1;0;0;0;0;0;0	GTPase NRas	Nras	tr|A0A0G2JE25|A0A0G2JE25_MOUSE GTPase NRas (Fragment) OS=Mus musculus OX=10090 GN=Nras PE=1 SV=1;tr|A0A0G2JGP4|A0A0G2JGP4_MOUSE GTPase NRas (Fragment) OS=Mus musculus OX=10090 GN=Nras PE=1 SV=1;tr|Q9D091|Q9D091_MOUSE GTPase NRas OS=Mus musculus OX=10090 GN	10	5	2	1	5	5	5	5	3	4	2	2	2	2	1	1	1	1	1	1	0	0	50	17.3	8.7	16.835	150	150;183;189;189;74;119;34;40;46;75	2	6	6				0	7.3325	By MS/MS	By MS/MS	By MS/MS	By MS/MS	By MS/MS	By MS/MS
A0A494BAN1;A0A494BA56;A0A0G2JE32;A0A0G2JGL0;P62838;P61079;Q6ZWY6	A0A494BAN1;A0A494BA56;A0A0G2JE32;A0A0G2JGL0;P62838;P61079;Q6ZWY6	2;2;2;2;2;2;1	2;2;2;2;2;2;1	1;1;1;1;1;1;1	Ubiquitin-conjugating enzyme E2 D2;Ubiquitin-conjugating enzyme E2 D3;Ubiquitin-conjugating enzyme E2 D2B	Ube2d2;Ube2d3;Ube2d2b	tr|A0A494BAN1|A0A494BAN1_MOUSE Ubiquitin-conjugating enzyme E2D 2A (Fragment) OS=Mus musculus OX=10090 GN=Ube2d2a PE=1 SV=1;tr|A0A494BA56|A0A494BA56_MOUSE Ubiquitin-conjugating enzyme E2D 2A (Fragment) OS=Mus musculus OX=10090 GN=Ube2d2a PE=1 SV=1;tr|A0A0G	7	2	2	1	2	2	2	2	2	2	2	2	2	2	2	2	1	1	1	1	1	1	31.5	31.5	12	10.508	92	92;93;132;148;147;147;147	3.8	12			6	12	0	10.704	By MS/MS	By MS/MS	By MS/MS	By MS/MS	By MS/MS	By MS/MS
A0A0G2JE52;P62835;A0A0G2JDL9;A0A0G2JED9	A0A0G2JE52;P62835;A0A0G2JDL9	6;6;5;2	2;2;1;0	2;2;1;0	Ras-related protein Rap-1A	Rap1a	tr|A0A0G2JE52|A0A0G2JE52_MOUSE Ras-related protein Rap-1A OS=Mus musculus OX=10090 GN=Rap1a PE=1 SV=1;sp|P62835|RAP1A_MOUSE Ras-related protein Rap-1A OS=Mus musculus OX=10090 GN=Rap1a PE=1 SV=1;tr|A0A0G2JDL9|A0A0G2JDL9_MOUSE MCG10748, isoform CRA_b OS=Mus	4	6	2	2	5	5	5	5	3	5	2	2	2	2	2	2	2	2	2	2	2	2	42.1	16.4	16.4	17.991	159	159;184;118;109	3.17	12	17	1	6	6	0	19.228	By MS/MS	By MS/MS	By MS/MS	By MS/MS	By MS/MS	By MS/MS
A0A0G2JEC4;Q9JK48-3;Q9JK48;Q9JK48-2	A0A0G2JEC4;Q9JK48-3;Q9JK48;Q9JK48-2	6;6;6;6	6;6;6;6	5;5;5;5	Endophilin-B1	Sh3glb1	tr|A0A0G2JEC4|A0A0G2JEC4_MOUSE Endophilin-B1 OS=Mus musculus OX=10090 GN=Sh3glb1 PE=1 SV=1;sp|Q9JK48-3|SHLB1_MOUSE Isoform 3 of Endophilin-B1 OS=Mus musculus OX=10090 GN=Sh3glb1;sp|Q9JK48|SHLB1_MOUSE Endophilin-B1 OS=Mus musculus OX=10090 GN=Sh3glb1 PE=1 S	4	6	6	5	3	1	5	2	2	4	3	1	5	2	2	4	2	1	4	1	1	3	13.5	13.5	11.4	44.303	394	394;355;365;386	4	1	7	1	10		0	10.7	By MS/MS	By MS/MS	By MS/MS	By MS/MS	By MS/MS	By MS/MS
A0A0G2JF33;A0A0G2JEE9;Q9CVI2-2;Q9CVI2	A0A0G2JF33;A0A0G2JEE9;Q9CVI2-2;Q9CVI2	2;2;2;2	2;2;2;2	2;2;2;2	Protein FAM133B	Fam133b	tr|A0A0G2JF33|A0A0G2JF33_MOUSE Protein FAM133B OS=Mus musculus OX=10090 GN=Fam133b PE=1 SV=1;tr|A0A0G2JEE9|A0A0G2JEE9_MOUSE Protein FAM133B OS=Mus musculus OX=10090 GN=Fam133b PE=1 SV=1;sp|Q9CVI2-2|F133B_MOUSE Isoform 2 of Protein FAM133B OS=Mus musculus O	4	2	2	2	2	0	2	1	2	1	2	0	2	1	2	1	2	0	2	1	2	1	17.4	17.4	17.4	13.025	109	109;228;115;245	4.75			5		3	0.00040758	4.3089	By MS/MS		By MS/MS	By MS/MS	By MS/MS	By matching
A0A0G2JEG8;Q7TQF7	A0A0G2JEG8;Q7TQF7	4;4	4;4	4;4	Amphiphysin	Amph	tr|A0A0G2JEG8|A0A0G2JEG8_MOUSE Amphiphysin OS=Mus musculus OX=10090 GN=Amph PE=1 SV=1;sp|Q7TQF7|AMPH_MOUSE Amphiphysin OS=Mus musculus OX=10090 GN=Amph PE=1 SV=1	2	4	4	4	1	1	2	3	3	0	1	1	2	3	3	0	1	1	2	3	3	0	6.2	6.2	6.2	75.339	690	690;686	5.3		1		4	5	0	6.2052	By MS/MS	By MS/MS	By MS/MS	By MS/MS	By MS/MS
A0A0G2JEK2;P63254	A0A0G2JEK2;P63254	2;2	2;2	2;2	Cysteine-rich protein 1	Crip1	tr|A0A0G2JEK2|A0A0G2JEK2_MOUSE Cysteine-rich protein 1 OS=Mus musculus OX=10090 GN=Crip1 PE=1 SV=1;sp|P63254|CRIP1_MOUSE Cysteine-rich protein 1 OS=Mus musculus OX=10090 GN=Crip1 PE=1 SV=2	2	2	2	2	2	2	2	2	2	2	2	2	2	2	2	2	2	2	2	2	2	2	21.9	21.9	21.9	13.582	128	128;77	2.67	18				9	0	14.766	By MS/MS	By MS/MS	By MS/MS	By MS/MS	By MS/MS	By MS/MS
A0A1L1SVG1;A0A0R4J169;E9QN52;A0A0G2JEP4;A0A0G2JFV5;A0A1L1SSC0;Q91WK0-2;Q91WK0;A0A1L1SQW1;A0A0G2JGZ1;A0A0G2JDR6	A0A1L1SVG1;A0A0R4J169;E9QN52;A0A0G2JEP4;A0A0G2JFV5;A0A1L1SSC0;Q91WK0-2;Q91WK0;A0A1L1SQW1;A0A0G2JGZ1	5;5;5;5;5;5;5;5;4;3;2	4;4;4;4;4;4;4;4;3;2;1	4;4;4;4;4;4;4;4;3;2;1	Leucine-rich repeat flightless-interacting protein 2	Lrrfip2	tr|A0A1L1SVG1|A0A1L1SVG1_MOUSE Leucine-rich repeat flightless-interacting protein 2 OS=Mus musculus OX=10090 GN=Lrrfip2 PE=1 SV=1;tr|A0A0R4J169|A0A0R4J169_MOUSE Leucine-rich repeat flightless-interacting protein 2 OS=Mus musculus OX=10090 GN=Lrrfip2 PE=1 S	11	5	4	4	4	3	4	4	3	2	3	2	3	3	2	1	3	2	3	3	2	1	17.4	14.2	14.2	42.382	373	373;400;415;424;437;670;400;415;403;173;173	4.31			11	5		0	18.229	By MS/MS	By MS/MS	By MS/MS	By MS/MS	By MS/MS	By matching
A0A0G2JEQ9;Q3U0I9;Q8CFD4;A0A0G2JDT3;A0A0G2JDJ6	A0A0G2JEQ9;Q3U0I9;Q8CFD4;A0A0G2JDT3	3;3;3;2;1	3;3;3;2;1	3;3;3;2;1	Sorting nexin-8	Snx8	tr|A0A0G2JEQ9|A0A0G2JEQ9_MOUSE Sorting nexin-8 (Fragment) OS=Mus musculus OX=10090 GN=Snx8 PE=1 SV=1;tr|Q3U0I9|Q3U0I9_MOUSE Sorting nexin-8 OS=Mus musculus OX=10090 GN=Snx8 PE=1 SV=1;sp|Q8CFD4|SNX8_MOUSE Sorting nexin-8 OS=Mus musculus OX=10090 GN=Snx8 PE=	5	3	3	3	1	1	1	2	1	1	1	1	1	2	1	1	1	1	1	2	1	1	21.6	21.6	21.6	20.373	176	176;411;459;75;88	4.71		3			4	0	5.41	By matching	By MS/MS	By MS/MS	By MS/MS	By MS/MS	By matching
A0A0G2JET2;Q8C078-4;Q8C078-2;Q8C078-3;Q8C078;Q8C078-5;A0A0G2JEC5	A0A0G2JET2;Q8C078-4;Q8C078-2;Q8C078-3;Q8C078;Q8C078-5	3;3;3;3;3;3;1	3;3;3;3;3;3;1	3;3;3;3;3;3;1	Calcium/calmodulin-dependent protein kinase kinase 2	Camkk2	tr|A0A0G2JET2|A0A0G2JET2_MOUSE Calcium/calmodulin-dependent protein kinase kinase 2 (Fragment) OS=Mus musculus OX=10090 GN=Camkk2 PE=1 SV=1;sp|Q8C078-4|KKCC2_MOUSE Isoform 4 of Calcium/calmodulin-dependent protein kinase kinase 2 OS=Mus musculus OX=10090 G	7	3	3	3	3	1	0	1	0	1	3	1	0	1	0	1	3	1	0	1	0	1	8.6	8.6	8.6	45.963	420	420;503;541;579;588;625;145	4		2	3		1	0.000588	3.614	By MS/MS	By MS/MS		By matching		By matching
A0A0G2JEV1;Q7TMG8;O55126	A0A0G2JEV1;Q7TMG8;O55126	1;1;1	1;1;1	1;1;1	Protein NipSnap homolog 2	Gbas	tr|A0A0G2JEV1|A0A0G2JEV1_MOUSE Protein NipSnap homolog 2 OS=Mus musculus OX=10090 GN=Nipsnap2 PE=1 SV=1;tr|Q7TMG8|Q7TMG8_MOUSE Glioblastoma amplified sequence OS=Mus musculus OX=10090 GN=Nipsnap2 PE=1 SV=1;sp|O55126|NIPS2_MOUSE Protein NipSnap homolog 2 OS	3	1	1	1	1	0	1	1	1	0	1	0	1	1	1	0	1	0	1	1	1	0	7.2	7.2	7.2	12.489	111	111;281;281	3.6		2	3			0.0061663	2.2209	By MS/MS		By MS/MS	By MS/MS	By MS/MS
Q8R344;A0A0G2JF16;A0A0G2JFK6	Q8R344;A0A0G2JF16	4;4;1	4;4;1	4;4;1	Coiled-coil domain-containing protein 12	Ccdc12	sp|Q8R344|CCD12_MOUSE Coiled-coil domain-containing protein 12 OS=Mus musculus OX=10090 GN=Ccdc12 PE=1 SV=2;tr|A0A0G2JF16|A0A0G2JF16_MOUSE Coiled-coil domain-containing protein 12 (Fragment) OS=Mus musculus OX=10090 GN=Ccdc12 PE=1 SV=1	3	4	4	4	4	4	4	3	4	2	4	4	4	3	4	2	4	4	4	3	4	2	30.7	30.7	30.7	18.891	166	166;142;88	3.5	5	6	10	7		0	57.558	By MS/MS	By MS/MS	By MS/MS	By MS/MS	By MS/MS	By MS/MS
A0A0G2JF55;Q4JK59	A0A0G2JF55;Q4JK59	6;6	6;6	6;6	Methylcytosine dioxygenase TET2	Tet2	tr|A0A0G2JF55|A0A0G2JF55_MOUSE Methylcytosine dioxygenase TET2 OS=Mus musculus OX=10090 GN=Tet2 PE=1 SV=1;sp|Q4JK59|TET2_MOUSE Methylcytosine dioxygenase TET2 OS=Mus musculus OX=10090 GN=Tet2 PE=1 SV=3	2	6	6	6	4	1	4	2	2	1	4	1	4	2	2	1	4	1	4	2	2	1	4.3	4.3	4.3	213.01	1920	1920;1912	4.36		3	5	4	2	0	9.3749	By MS/MS	By MS/MS	By MS/MS	By MS/MS	By MS/MS	By matching
A0A0G2JF67;Q8CG03	A0A0G2JF67;Q8CG03	2;2	2;2	2;2	cGMP-specific 3,5-cyclic phosphodiesterase	Pde5a	tr|A0A0G2JF67|A0A0G2JF67_MOUSE Phosphodiesterase OS=Mus musculus OX=10090 GN=Pde5a PE=1 SV=1;sp|Q8CG03|PDE5A_MOUSE cGMP-specific 3,5-cyclic phosphodiesterase OS=Mus musculus OX=10090 GN=Pde5a PE=1 SV=2	2	2	2	2	0	1	0	1	2	1	0	1	0	1	2	1	0	1	0	1	2	1	2.4	2.4	2.4	94.457	833	833;865	5.8				1	4	0.00060667	4.1803		By MS/MS		By MS/MS	By MS/MS	By MS/MS
A0A0G2JFJ4;Q149L6-2;Q149L6;Q149L6-3	A0A0G2JFJ4;Q149L6-2;Q149L6;Q149L6-3	3;3;3;2	3;3;3;2	3;3;3;2	DnaJ homolog subfamily B member 14	Dnajb14	tr|A0A0G2JFJ4|A0A0G2JFJ4_MOUSE DnaJ homolog subfamily B member 14 (Fragment) OS=Mus musculus OX=10090 GN=Dnajb14 PE=1 SV=1;sp|Q149L6-2|DJB14_MOUSE Isoform 2 of DnaJ homolog subfamily B member 14 OS=Mus musculus OX=10090 GN=Dnajb14;sp|Q149L6|DJB14_MOUSE Dna	4	3	3	3	2	2	2	2	2	1	2	2	2	2	2	1	2	2	2	2	2	1	27.4	27.4	27.4	13.227	124	124;329;379;158	3.91		6		5		0.00060545	4.1326	By MS/MS	By MS/MS	By MS/MS	By MS/MS	By MS/MS	By MS/MS
A0A0G2JFJ6;Q7TPD0;Q7TPD0-2	A0A0G2JFJ6;Q7TPD0;Q7TPD0-2	6;6;3	6;6;3	6;6;3	Integrator complex subunit 3	Ints3	tr|A0A0G2JFJ6|A0A0G2JFJ6_MOUSE Integrator complex subunit 3 OS=Mus musculus OX=10090 GN=Ints3 PE=1 SV=1;sp|Q7TPD0|INT3_MOUSE Integrator complex subunit 3 OS=Mus musculus OX=10090 GN=Ints3 PE=1 SV=2;sp|Q7TPD0-2|INT3_MOUSE Isoform 2 of Integrator complex sub	3	6	6	6	4	3	4	4	5	3	4	3	4	4	5	3	4	3	4	4	5	3	10.5	10.5	10.5	117.25	1035	1035;1041;330	3.86	8		11	17	1	0	122.36	By MS/MS	By MS/MS	By MS/MS	By MS/MS	By MS/MS	By MS/MS
A0A0G2JFP4;Q8K385	A0A0G2JFP4;Q8K385	2;2	2;2	2;2	Ferric-chelate reductase 1	FRRS1	tr|A0A0G2JFP4|A0A0G2JFP4_MOUSE Ferric-chelate reductase 1 OS=Mus musculus OX=10090 GN=Frrs1 PE=1 SV=1;sp|Q8K385|FRRS1_MOUSE Ferric-chelate reductase 1 OS=Mus musculus OX=10090 GN=FRRS1 PE=1 SV=1	2	2	2	2	2	0	0	1	1	1	2	0	0	1	1	1	2	0	0	1	1	1	3	3	3	66.066	592	592;592	6					5	0.0028886	2.5554	By MS/MS			By MS/MS	By MS/MS	By matching
A0A0G2JFR8	A0A0G2JFR8	1	1	1			tr|A0A0G2JFR8|A0A0G2JFR8_MOUSE Transcriptional regulator ATRX (Fragment) OS=Mus musculus OX=10090 GN=Atrx PE=1 SV=1	1	1	1	1	1	1	1	1	1	0	1	1	1	1	1	0	1	1	1	1	1	0	7.2	7.2	7.2	37.274	334	334	3		5				0	5.3437	By MS/MS	By MS/MS	By MS/MS	By MS/MS	By MS/MS
A0A0G2JFT8;Q9D394;Q9D394-3;Q9D394-4;Q9D394-2	A0A0G2JFT8;Q9D394;Q9D394-3;Q9D394-4;Q9D394-2	3;3;3;3;3	3;3;3;3;3	3;3;3;3;3	Protein RUFY3	Rufy3	tr|A0A0G2JFT8|A0A0G2JFT8_MOUSE Protein RUFY3 OS=Mus musculus OX=10090 GN=Rufy3 PE=1 SV=1;sp|Q9D394|RUFY3_MOUSE Protein RUFY3 OS=Mus musculus OX=10090 GN=Rufy3 PE=1 SV=1;sp|Q9D394-3|RUFY3_MOUSE Isoform 3 of Protein RUFY3 OS=Mus musculus OX=10090 GN=Rufy3;sp	5	3	3	3	3	3	1	3	2	3	3	3	1	3	2	3	3	3	1	3	2	3	5.8	5.8	5.8	74.769	669	669;469;487;519;665	3.73		4	11			0	6.5431	By MS/MS	By MS/MS	By MS/MS	By MS/MS	By MS/MS	By MS/MS
A0A0G2JFV4;Q9D0C1	A0A0G2JFV4;Q9D0C1	1;1	1;1	1;1	E3 ubiquitin-protein ligase RNF115	Rnf115	tr|A0A0G2JFV4|A0A0G2JFV4_MOUSE E3 ubiquitin-protein ligase RNF115 OS=Mus musculus OX=10090 GN=Rnf115 PE=1 SV=1;sp|Q9D0C1|RN115_MOUSE E3 ubiquitin-protein ligase RNF115 OS=Mus musculus OX=10090 GN=Rnf115 PE=1 SV=1	2	1	1	1	0	1	0	1	1	1	0	1	0	1	1	1	0	1	0	1	1	1	23.4	23.4	23.4	8.1238	77	77;305	3		4				0.00041322	4.5583		By MS/MS		By MS/MS	By MS/MS	By MS/MS
Q3TUE1;A0A0G2JGW9;A0A0G2JFY5;Q3UUU2;Q91WJ8;Q91WJ8-2;A0A0G2JG00;A0A0G2JFK2;A0A0G2JG96;A0A0G2JGV9	Q3TUE1;A0A0G2JGW9;A0A0G2JFY5;Q3UUU2;Q91WJ8;Q91WJ8-2;A0A0G2JG00;A0A0G2JFK2	30;30;30;30;30;30;29;19;6;2	30;30;30;30;30;30;29;19;6;2	27;27;27;27;27;27;27;18;6;2	Far upstream element-binding protein 1	Fubp1	tr|Q3TUE1|Q3TUE1_MOUSE Far upstream element-binding protein 1 OS=Mus musculus OX=10090 GN=Fubp1 PE=1 SV=1;tr|A0A0G2JGW9|A0A0G2JGW9_MOUSE Far upstream element-binding protein 1 OS=Mus musculus OX=10090 GN=Fubp1 PE=1 SV=1;tr|A0A0G2JFY5|A0A0G2JFY5_MOUSE Far u	10	30	30	27	25	25	25	27	25	22	25	25	25	27	25	22	23	24	22	24	23	20	41.3	41.3	37.7	67.443	642	642;643;654;700;651;672;523;306;149;69	3.11	136	61	53	73	37	0	323.31	By MS/MS	By MS/MS	By MS/MS	By MS/MS	By MS/MS	By MS/MS
A0A0G2JG76;Q9ES34	A0A0G2JG76;Q9ES34	1;1	1;1	1;1	Ubiquitin-protein ligase E3B	Ube3b	tr|A0A0G2JG76|A0A0G2JG76_MOUSE Ubiquitin-protein ligase E3B (Fragment) OS=Mus musculus OX=10090 GN=Ube3b PE=1 SV=2;sp|Q9ES34|UBE3B_MOUSE Ubiquitin-protein ligase E3B OS=Mus musculus OX=10090 GN=Ube3b PE=1 SV=3	2	1	1	1	1	1	1	1	1	0	1	1	1	1	1	0	1	1	1	1	1	0	13.5	13.5	13.5	20.153	178	178;1070	5				5		0.00058847	3.6318	By MS/MS	By MS/MS	By MS/MS	By MS/MS	By matching
A0A0G2JGG7;Q6S5J6-4;Q6S5J6-2;Q6S5J6-3;Q6S5J6	A0A0G2JGG7;Q6S5J6-4;Q6S5J6-2;Q6S5J6-3;Q6S5J6	1;1;1;1;1	1;1;1;1;1	1;1;1;1;1	Krev interaction trapped protein 1	Krit1	tr|A0A0G2JGG7|A0A0G2JGG7_MOUSE Krev interaction trapped protein 1 OS=Mus musculus OX=10090 GN=Krit1 PE=1 SV=1;sp|Q6S5J6-4|KRIT1_MOUSE Isoform 4 of Krev interaction trapped protein 1 OS=Mus musculus OX=10090 GN=Krit1;sp|Q6S5J6-2|KRIT1_MOUSE Isoform 2 of Kre	5	1	1	1	0	1	0	1	1	0	0	1	0	1	1	0	0	1	0	1	1	0	2.5	2.5	2.5	73.814	647	647;329;697;730;736	5				3		0.0022108	2.7936		By MS/MS		By MS/MS	By MS/MS
A0A0G2JGQ4;P54729	A0A0G2JGQ4;P54729	7;7	7;7	7;7	NEDD8 ultimate buster 1	Nub1	tr|A0A0G2JGQ4|A0A0G2JGQ4_MOUSE NEDD8 ultimate buster 1 OS=Mus musculus OX=10090 GN=Nub1 PE=1 SV=1;sp|P54729|NUB1_MOUSE NEDD8 ultimate buster 1 OS=Mus musculus OX=10090 GN=Nub1 PE=1 SV=2	2	7	7	7	6	6	7	7	7	7	6	6	7	7	7	7	6	6	7	7	7	7	11.9	11.9	11.9	73.116	638	638;614	3.59	18	17	11	13	14	0	55.115	By MS/MS	By MS/MS	By MS/MS	By MS/MS	By MS/MS	By MS/MS
E9Q1V9;E9Q1W0;E9Q1T1;A0A0G2JGS4;Q6PHZ2-2;Q6PHZ2-4;Q6PHZ2;Q6PHZ2-5;Q8CCM0;E9QAJ4;D6RDQ8;E9PXV3;F6RWZ9	E9Q1V9;E9Q1W0;E9Q1T1;A0A0G2JGS4;Q6PHZ2-2;Q6PHZ2-4;Q6PHZ2;Q6PHZ2-5;Q8CCM0;E9QAJ4;D6RDQ8	4;4;4;4;4;4;4;4;3;2;2;1;1	3;3;3;3;3;3;3;3;2;2;2;1;1	3;3;3;3;3;3;3;3;2;2;2;1;1	Calcium/calmodulin-dependent protein kinase type II subunit delta	Camk2d	tr|E9Q1V9|E9Q1V9_MOUSE Calcium/calmodulin-dependent protein kinase type II subunit delta OS=Mus musculus OX=10090 GN=Camk2d PE=1 SV=2;tr|E9Q1W0|E9Q1W0_MOUSE Calcium/calmodulin-dependent protein kinase type II subunit delta OS=Mus musculus OX=10090 GN=Camk2	13	4	3	3	2	3	3	2	1	2	1	2	2	1	0	1	1	2	2	1	0	1	11.1	7.2	7.2	55.293	488	488;512;533;533;478;492;499;512;361;142;147;160;169	4.57			3	4		0	7.967	By MS/MS	By MS/MS	By MS/MS	By MS/MS	By matching	By matching
A0A140T8R8;A0A0G2JGV7;Q3UT23;A0A1Y7VP24;Q9QZ73;A0A0G2JEA2;A0A0G2JDN9;A0A1B0GXL7;A0A0G2JDM0	A0A140T8R8;A0A0G2JGV7;Q3UT23;A0A1Y7VP24;Q9QZ73;A0A0G2JEA2;A0A0G2JDN9;A0A1B0GXL7;A0A0G2JDM0	2;2;2;2;2;1;1;1;1	2;2;2;2;2;1;1;1;1	2;2;2;2;2;1;1;1;1	DCN1-like protein;DCN1-like protein 1	Dcun1d1	tr|A0A140T8R8|A0A140T8R8_MOUSE DCN1-like protein (Fragment) OS=Mus musculus OX=10090 GN=Dcun1d1 PE=1 SV=1;tr|A0A0G2JGV7|A0A0G2JGV7_MOUSE DCN1-like protein (Fragment) OS=Mus musculus OX=10090 GN=Dcun1d1 PE=1 SV=1;tr|Q3UT23|Q3UT23_MOUSE DCN1-like protein OS=	9	2	2	2	2	2	2	2	2	2	2	2	2	2	2	2	2	2	2	2	2	2	8.9	8.9	8.9	24.94	214	214;220;244;259;259;93;114;115;142	3.67	6		6		6	0	100.37	By MS/MS	By MS/MS	By MS/MS	By MS/MS	By MS/MS	By MS/MS
A0A0G2JGW6;B1AU42;F2Z3Z6;E9Q341;A0A0G2JF79;Q5FWX6;A0A0G2JFE2;B1AU43;D3Z6I0;Q8BLF2-8;Q62101;Q69ZM6-2;Q69ZM6-3;Q8BLF2-4;Q8BLF2-6;Q3UTQ8;Q9QUK0-2;Q9QUK0;Q8BLF2-2;Q8K1Y2;Q8BZ03;Q8BLF2-5;Q8CEQ0;Q8BLF2-7;Q8BLF2;Q69ZM6	A0A0G2JGW6;B1AU42;F2Z3Z6;E9Q341;A0A0G2JF79;Q5FWX6;A0A0G2JFE2;B1AU43;D3Z6I0;Q8BLF2-8;Q62101;Q69ZM6-2;Q69ZM6-3;Q8BLF2-4;Q8BLF2-6;Q3UTQ8;Q9QUK0-2;Q9QUK0;Q8BLF2-2;Q8K1Y2;Q8BZ03;Q8BLF2-5;Q8CEQ0;Q8BLF2-7;Q8BLF2;Q69ZM6	2;1;1;1;1;1;1;1;1;1;1;1;1;1;1;1;1;1;1;1;1;1;1;1;1;1	2;1;1;1;1;1;1;1;1;1;1;1;1;1;1;1;1;1;1;1;1;1;1;1;1;1	2;1;1;1;1;1;1;1;1;1;1;1;1;1;1;1;1;1;1;1;1;1;1;1;1;1	Serine/threonine-protein kinase;Protein kinase C;Cyclin-dependent kinase-like 3;Serine/threonine-protein kinase D1;Serine/threonine-protein kinase 36;Cyclin-dependent kinase-like 5;Cyclin-dependent kinase-like 2;Serine/threonine-protein kinase D3;Serine/threonine-protein kinase D2;Cyclin-dependent kinase-like 1	Cdkl3;Stk36;Prkd3;Prkd1;Cdkl5;Cdkl2;Prkd2;Cdkl1	tr|A0A0G2JGW6|A0A0G2JGW6_MOUSE Cyclin-dependent kinase-like 5 OS=Mus musculus OX=10090 GN=Cdkl5 PE=1 SV=1;tr|B1AU42|B1AU42_MOUSE Cyclin-dependent kinase-like 3 (Fragment) OS=Mus musculus OX=10090 GN=Cdkl3 PE=3 SV=1;tr|F2Z3Z6|F2Z3Z6_MOUSE Cyclin-dependent k	26	2	2	2	2	1	2	2	1	2	2	1	2	2	1	2	2	1	2	2	1	2	1.7	1.7	1.7	107.57	960	960;192;591;1048;923;890;862;610;795;585;918;1268;1188;353;457;938;564;568;585;889;875;578;352;581;595;1316	6					10	0.0023923	2.7836	By MS/MS	By MS/MS	By MS/MS	By MS/MS	By MS/MS	By matching
Q8VCE0;A0A0G2JGX4;Q6PIC6	Q8VCE0;A0A0G2JGX4;Q6PIC6	11;11;11	3;3;3	3;3;3	Sodium/potassium-transporting ATPase subunit alpha-3	Atp1a3	tr|Q8VCE0|Q8VCE0_MOUSE Sodium/potassium-transporting ATPase subunit alpha OS=Mus musculus OX=10090 GN=Atp1a3 PE=1 SV=1;tr|A0A0G2JGX4|A0A0G2JGX4_MOUSE Sodium/potassium-transporting ATPase subunit alpha OS=Mus musculus OX=10090 GN=Atp1a3 PE=1 SV=1;sp|Q6PIC6|	3	11	3	3	10	8	11	10	8	10	2	1	3	2	1	2	2	1	3	2	1	2	15.2	3.8	3.8	115.97	1053	1053;1026;1013	3.86		10			4	0.00021281	5.0384	By MS/MS	By MS/MS	By MS/MS	By MS/MS	By MS/MS	By MS/MS
A0A0G2JH04;P63073;A0A0G2JGT5;A0A0G2JFB4;A0A0G2JG98	A0A0G2JH04;P63073;A0A0G2JGT5;A0A0G2JFB4	6;6;5;4;2	6;6;5;4;2	6;6;5;4;2	Eukaryotic translation initiation factor 4E	Eif4e	tr|A0A0G2JH04|A0A0G2JH04_MOUSE Eukaryotic translation initiation factor 4E OS=Mus musculus OX=10090 GN=Eif4e PE=1 SV=1;sp|P63073|IF4E_MOUSE Eukaryotic translation initiation factor 4E OS=Mus musculus OX=10090 GN=Eif4e PE=1 SV=1;tr|A0A0G2JGT5|A0A0G2JGT5_MOU	5	6	6	6	6	6	6	6	6	6	6	6	6	6	6	6	6	6	6	6	6	6	42.2	42.2	42.2	21.009	185	185;217;183;132;79	3.38	42	28	12	18	28	0	111	By MS/MS	By MS/MS	By MS/MS	By MS/MS	By MS/MS	By MS/MS
K3W4P2;A0A0G2JH17;Q6P4S8;A0A0G2JFR3;A0A0G2JDG8	K3W4P2;A0A0G2JH17;Q6P4S8	12;12;12;2;2	12;12;12;2;2	12;12;12;2;2	Integrator complex subunit 1	Ints1	tr|K3W4P2|K3W4P2_MOUSE Integrator complex subunit 1 OS=Mus musculus OX=10090 GN=Ints1 PE=1 SV=2;tr|A0A0G2JH17|A0A0G2JH17_MOUSE Integrator complex subunit 1 OS=Mus musculus OX=10090 GN=Ints1 PE=1 SV=1;sp|Q6P4S8|INT1_MOUSE Integrator complex subunit 1 OS=Mus	5	12	12	12	7	6	6	7	7	9	7	6	6	7	7	9	7	6	6	7	7	9	6.4	6.4	6.4	247.71	2220	2220;2222;2195;137;175	5.1		2	6	20	14	0	40.024	By MS/MS	By MS/MS	By MS/MS	By MS/MS	By MS/MS	By MS/MS
E9Q5A3;Z4YJZ7;A0A0H2UH19;Q5DW34-3;Q5DW34;Q5DW34-2;A0A0A6YWA0;A0A140LII4;A2AIS5;F6WWY8;A0A0G2JFI9	E9Q5A3;Z4YJZ7;A0A0H2UH19;Q5DW34-3;Q5DW34;Q5DW34-2	10;10;10;10;10;9;2;2;2;1;1	10;10;10;10;10;9;2;2;2;1;1	9;9;9;9;9;8;2;2;2;1;1	Histone-lysine N-methyltransferase EHMT1	Ehmt1	tr|E9Q5A3|E9Q5A3_MOUSE Histone-lysine N-methyltransferase EHMT1 OS=Mus musculus OX=10090 GN=Ehmt1 PE=1 SV=2;tr|Z4YJZ7|Z4YJZ7_MOUSE Histone-lysine N-methyltransferase EHMT1 OS=Mus musculus OX=10090 GN=Ehmt1 PE=1 SV=2;tr|A0A0H2UH19|A0A0H2UH19_MOUSE Histone-l	11	10	10	9	9	8	10	8	8	7	9	8	10	8	8	7	8	7	9	8	8	6	9.3	9.3	8.5	136.66	1248	1248;1288;1289;1248;1296;1243;203;232;362;224;254	4.05	2	10	27	13	3	0	50.137	By MS/MS	By MS/MS	By MS/MS	By MS/MS	By MS/MS	By MS/MS
A0A0J9YQM4;Q8BFX1	A0A0J9YQM4;Q8BFX1	2;2	2;2	2;2	E3 ubiquitin-protein ligase RNF187	Rnf187	tr|A0A0J9YQM4|A0A0J9YQM4_MOUSE E3 ubiquitin-protein ligase RNF187 OS=Mus musculus OX=10090 GN=Rnf187 PE=1 SV=1;sp|Q8BFX1|RN187_MOUSE E3 ubiquitin-protein ligase RNF187 OS=Mus musculus OX=10090 GN=Rnf187 PE=1 SV=2	2	2	2	2	1	1	2	2	2	1	1	1	2	2	2	1	1	1	2	2	2	1	10.2	10.2	10.2	26.295	236	236;236	5.33			3		6	0	5.8787	By MS/MS	By MS/MS	By MS/MS	By MS/MS	By MS/MS	By MS/MS
A0A0J9YTS4;D3YXN7;Q8BJU2	A0A0J9YTS4;D3YXN7;Q8BJU2	2;2;2	2;2;2	2;2;2	Tetraspanin;Tetraspanin-9	Tspan9	tr|A0A0J9YTS4|A0A0J9YTS4_MOUSE Tetraspanin (Fragment) OS=Mus musculus OX=10090 GN=Tspan9 PE=1 SV=1;tr|D3YXN7|D3YXN7_MOUSE Tetraspanin (Fragment) OS=Mus musculus OX=10090 GN=Tspan9 PE=1 SV=2;sp|Q8BJU2|TSN9_MOUSE Tetraspanin-9 OS=Mus musculus OX=10090 GN=Tsp	3	2	2	2	2	1	1	1	1	1	2	1	1	1	1	1	2	1	1	1	1	1	15.6	15.6	15.6	18.483	167	167;263;239	3.57	1		6			0	13.682	By MS/MS	By MS/MS	By MS/MS	By MS/MS	By MS/MS	By MS/MS
Q3U6F1;E9Q7W0;A0A0J9YTV5;P31266-2;P31266;A0A0J9YVE0	Q3U6F1;E9Q7W0;A0A0J9YTV5;P31266-2;P31266;A0A0J9YVE0	6;6;6;6;6;3	6;6;6;6;6;3	6;6;6;6;6;3	Recombining binding protein suppressor of hairless	Rbpj	tr|Q3U6F1|Q3U6F1_MOUSE Recombining-binding protein suppressor of hairless OS=Mus musculus OX=10090 GN=Rbpj PE=1 SV=1;tr|E9Q7W0|E9Q7W0_MOUSE Recombining-binding protein suppressor of hairless OS=Mus musculus OX=10090 GN=Rbpj PE=1 SV=1;tr|A0A0J9YTV5|A0A0J9YT	6	6	6	6	5	5	6	4	5	4	5	5	6	4	5	4	5	5	6	4	5	4	13.5	13.5	13.5	51.926	465	465;485;507;487;526;180	4.54	18	2	9	20	43	0	43.821	By MS/MS	By MS/MS	By MS/MS	By MS/MS	By MS/MS	By MS/MS
A0A0J9YTY0;A0A0J9YUL3;Q8C1B7-3;Q8C1B7-2;Q8C1B7;A0A0J9YVA6;A0A0J9YUV6	A0A0J9YTY0;A0A0J9YUL3;Q8C1B7-3;Q8C1B7-2;Q8C1B7	18;18;18;18;18;6;5	18;18;18;18;18;6;5	11;11;11;11;11;5;4	Septin-11	2020-09-11	tr|A0A0J9YTY0|A0A0J9YTY0_MOUSE Septin 11 OS=Mus musculus OX=10090 GN=Sept11 PE=1 SV=1;tr|A0A0J9YUL3|A0A0J9YUL3_MOUSE Septin 11 OS=Mus musculus OX=10090 GN=Sept11 PE=1 SV=1;sp|Q8C1B7-3|SEP11_MOUSE Isoform 3 of Septin-11 OS=Mus musculus OX=10090 GN=Septin11;	7	18	18	11	16	16	17	17	16	16	16	16	17	17	16	16	10	9	11	10	9	10	43.3	43.3	28.9	48.978	425	425;432;425;429;431;204;97	3.44	79	31	62	46	39	0	323.31	By MS/MS	By MS/MS	By MS/MS	By MS/MS	By MS/MS	By MS/MS
A0A0J9YU62;O88712-2;O88712;A0A0J9YUM4;O88712-3;A0A0J9YUR5;A0A0J9YU66;A0A0J9YVI3;A0A0J9YTW3	A0A0J9YU62;O88712-2;O88712;A0A0J9YUM4;O88712-3;A0A0J9YUR5	6;6;6;5;4;3;2;2;1	4;4;4;3;3;2;1;1;1	4;4;4;3;3;2;1;1;1	C-terminal-binding protein 1	Ctbp1	tr|A0A0J9YU62|A0A0J9YU62_MOUSE C-terminal-binding protein 1 OS=Mus musculus OX=10090 GN=Ctbp1 PE=1 SV=1;sp|O88712-2|CTBP1_MOUSE Isoform 2 of C-terminal-binding protein 1 OS=Mus musculus OX=10090 GN=Ctbp1;sp|O88712|CTBP1_MOUSE C-terminal-binding protein 1 O	9	6	4	4	6	6	5	6	5	4	4	4	3	4	3	3	4	4	3	4	3	3	17.9	14	14	46.527	429	429;430;441;337;367;117;77;85;180	3.58	10	3	13	7	5	0	34.366	By MS/MS	By MS/MS	By MS/MS	By MS/MS	By MS/MS	By MS/MS
A0A0J9YU67;F8WJA5;Q61474-2;Q61474;A0A0J9YTX9	A0A0J9YU67;F8WJA5;Q61474-2;Q61474;A0A0J9YTX9	4;4;4;4;2	3;3;3;3;1	3;3;3;3;1	RNA-binding protein Musashi homolog 1	Msi1	tr|A0A0J9YU67|A0A0J9YU67_MOUSE RNA-binding protein Musashi homolog 1 (Fragment) OS=Mus musculus OX=10090 GN=Msi1 PE=1 SV=1;tr|F8WJA5|F8WJA5_MOUSE RNA-binding protein Musashi homolog 1 (Fragment) OS=Mus musculus OX=10090 GN=Msi1 PE=1 SV=1;sp|Q61474-2|MSI1H_	5	4	3	3	4	2	2	4	2	3	3	2	2	3	2	2	3	2	2	3	2	2	17.8	13.4	13.4	29.383	269	269;325;301;362;196	4.31	2		6	5	3	0	7.1801	By MS/MS	By MS/MS	By MS/MS	By MS/MS	By MS/MS	By MS/MS
A0A0J9YUB6;Q9CRD0;Q9CRD0-3;Q9CRD0-2;A0A0J9YUK7	A0A0J9YUB6;Q9CRD0	5;5;2;2;1	5;5;2;2;1	5;5;2;2;1	OCIA domain-containing protein 1	Ociad1	tr|A0A0J9YUB6|A0A0J9YUB6_MOUSE OCIA domain-containing protein 1 (Fragment) OS=Mus musculus OX=10090 GN=Ociad1 PE=1 SV=1;sp|Q9CRD0|OCAD1_MOUSE OCIA domain-containing protein 1 OS=Mus musculus OX=10090 GN=Ociad1 PE=1 SV=1	5	5	5	5	3	4	4	4	4	2	3	4	4	4	4	2	3	4	4	4	4	2	44.9	44.9	44.9	19.622	178	178;247;189;196;136	2.67	15	7	10	4		0	170.55	By MS/MS	By MS/MS	By MS/MS	By MS/MS	By MS/MS	By MS/MS
A0A0J9YUD5;B9EJ54;E9Q880	A0A0J9YUD5;B9EJ54	21;21;3	21;21;3	21;21;3		Nup205	tr|A0A0J9YUD5|A0A0J9YUD5_MOUSE Nucleoporin 205 OS=Mus musculus OX=10090 GN=Nup205 PE=1 SV=1;tr|B9EJ54|B9EJ54_MOUSE MCG21756, isoform CRA_b OS=Mus musculus OX=10090 GN=Nup205 PE=1 SV=1	3	21	21	21	15	14	16	16	15	19	15	14	16	16	15	19	15	14	16	16	15	19	13.2	13.2	13.2	233.1	2061	2061;2008;322	3.18	56	33	28	22	23	0	152.07	By MS/MS	By MS/MS	By MS/MS	By MS/MS	By MS/MS	By MS/MS
Q8BY07;A0A0J9YUG5;Q8BGM4;D3Z271;F6RCZ2	Q8BY07;A0A0J9YUG5;Q8BGM4;D3Z271	3;3;3;2;1	3;3;3;2;1	3;3;3;2;1		Wbscr27	tr|Q8BY07|Q8BY07_MOUSE Methyltransferase-like 27 OS=Mus musculus OX=10090 GN=Mettl27 PE=1 SV=1;tr|A0A0J9YUG5|A0A0J9YUG5_MOUSE Methyltransferase-like 27 (Fragment) OS=Mus musculus OX=10090 GN=Mettl27 PE=1 SV=3;tr|Q8BGM4|Q8BGM4_MOUSE Methyltransferase-like 2	5	3	3	3	3	1	1	2	2	0	3	1	1	2	2	0	3	1	1	2	2	0	17.4	17.4	17.4	22.701	207	207;219;238;129;76	4.56			4	5		0	10.542	By MS/MS	By MS/MS	By MS/MS	By MS/MS	By MS/MS
A0A0J9YVJ2;A0A0J9YUI3;Q9CQT5	A0A0J9YVJ2;A0A0J9YUI3;Q9CQT5	2;2;2	2;2;2	2;2;2	Proteasome maturation protein	Pomp	tr|A0A0J9YVJ2|A0A0J9YVJ2_MOUSE Proteasome maturation protein OS=Mus musculus OX=10090 GN=Pomp PE=1 SV=1;tr|A0A0J9YUI3|A0A0J9YUI3_MOUSE Proteasome maturation protein OS=Mus musculus OX=10090 GN=Pomp PE=1 SV=1;sp|Q9CQT5|POMP_MOUSE Proteasome maturation prote	3	2	2	2	1	2	2	2	2	2	1	2	2	2	2	2	1	2	2	2	2	2	25.5	25.5	25.5	10.588	94	94;119;141	5.31				11	5	0.00021048	4.8514	By MS/MS	By MS/MS	By MS/MS	By MS/MS	By MS/MS	By MS/MS
A0A0J9YUR7;A0A0J9YUW6;A0A0J9YUN2;Q3TQ27;Q9Z255	A0A0J9YUR7;A0A0J9YUW6;A0A0J9YUN2;Q3TQ27;Q9Z255	1;1;1;1;1	1;1;1;1;1	1;1;1;1;1	Ubiquitin-conjugating enzyme E2 A	Ube2a	tr|A0A0J9YUR7|A0A0J9YUR7_MOUSE Ubiquitin-conjugating enzyme E2 A OS=Mus musculus OX=10090 GN=Ube2a PE=1 SV=1;tr|A0A0J9YUW6|A0A0J9YUW6_MOUSE Ubiquitin-conjugating enzyme E2 A (Fragment) OS=Mus musculus OX=10090 GN=Ube2a PE=1 SV=1;tr|A0A0J9YUN2|A0A0J9YUN2_MO	5	1	1	1	1	1	1	1	1	1	1	1	1	1	1	1	1	1	1	1	1	1	20.2	20.2	20.2	9.4837	84	84;110;119;149;152	3.54	6			2	5	0	6.8702	By MS/MS	By MS/MS	By MS/MS	By MS/MS	By MS/MS	By MS/MS
A0A0J9YUN6;Q0VGU5;Q6TEK5	A0A0J9YUN6;Q0VGU5;Q6TEK5	1;1;1	1;1;1	1;1;1	Vitamin K epoxide reductase complex subunit 1-like protein 1	Vkorc1l1	tr|A0A0J9YUN6|A0A0J9YUN6_MOUSE Vitamin K epoxide reductase complex subunit 1-like protein 1 (Fragment) OS=Mus musculus OX=10090 GN=Vkorc1l1 PE=1 SV=1;tr|Q0VGU5|Q0VGU5_MOUSE Vitamin K epoxide reductase complex subunit 1-like protein 1 OS=Mus musculus OX=100	3	1	1	1	1	1	1	1	1	1	1	1	1	1	1	1	1	1	1	1	1	1	12.2	12.2	12.2	8.9342	82	82;127;176	5				6		0.0022247	2.8452	By MS/MS	By MS/MS	By MS/MS	By MS/MS	By MS/MS	By MS/MS
A0A0J9YUQ8;A0A0J9YUJ8	A0A0J9YUQ8	9;3	1;1	1;1			tr|A0A0J9YUQ8|A0A0J9YUQ8_MOUSE Gelsolin (Fragment) OS=Mus musculus OX=10090 GN=Gsn PE=1 SV=1	2	9	1	1	9	7	9	9	6	7	1	1	1	1	1	1	1	1	1	1	1	1	18.8	3.2	3.2	62.354	568	568;166	6					7	0	6.9559	By MS/MS	By MS/MS	By MS/MS	By MS/MS	By MS/MS	By MS/MS
A0A0J9YV86;A0A0J9YUR2;Q5SXY1-3;A0A0J9YUF8;A0A0J9YTU3;Q5SXY1-2;Q5SXY1;A0A0J9YV47;A0A0J9YUG8	A0A0J9YV86;A0A0J9YUR2;Q5SXY1-3;A0A0J9YUF8;A0A0J9YTU3;Q5SXY1-2;Q5SXY1	8;8;8;7;7;7;7;2;2	8;8;8;7;7;7;7;2;2	8;8;8;7;7;7;7;2;2	Cytospin-B	Specc1	tr|A0A0J9YV86|A0A0J9YV86_MOUSE Cytospin-B OS=Mus musculus OX=10090 GN=Specc1 PE=1 SV=1;tr|A0A0J9YUR2|A0A0J9YUR2_MOUSE Cytospin-B OS=Mus musculus OX=10090 GN=Specc1 PE=1 SV=1;sp|Q5SXY1-3|CYTSB_MOUSE Isoform 4 of Cytospin-B OS=Mus musculus OX=10090 GN=Specc1	9	8	8	8	5	4	7	4	5	5	5	4	7	4	5	5	5	4	7	4	5	5	17.6	17.6	17.6	79.486	710	710;978;987;781;1058;790;1067;121;407	4.32		15		19	4	0	18.872	By MS/MS	By MS/MS	By MS/MS	By MS/MS	By MS/MS	By MS/MS
A0A0J9YUT8;Q8R3C6;Q8R3C6-2	A0A0J9YUT8;Q8R3C6;Q8R3C6-2	12;12;8	12;12;8	12;12;8	Probable RNA-binding protein 19	Rbm19	tr|A0A0J9YUT8|A0A0J9YUT8_MOUSE Probable RNA-binding protein 19 OS=Mus musculus OX=10090 GN=Rbm19 PE=1 SV=1;sp|Q8R3C6|RBM19_MOUSE Probable RNA-binding protein 19 OS=Mus musculus OX=10090 GN=Rbm19 PE=1 SV=1;sp|Q8R3C6-2|RBM19_MOUSE Isoform 2 of Probable RNA-b	3	12	12	12	10	9	11	11	9	9	10	9	11	11	9	9	10	9	11	11	9	9	16.3	16.3	16.3	96.654	870	870;952;521	3.29	32	25	14	11	19	0	73.313	By MS/MS	By MS/MS	By MS/MS	By MS/MS	By MS/MS	By MS/MS
A0A0J9YUX2;Q6NXK5	A0A0J9YUX2;Q6NXK5	1;1	1;1	1;1	RNA/RNP complex-1-interacting phosphatase	Dusp11	tr|A0A0J9YUX2|A0A0J9YUX2_MOUSE RNA/RNP complex-1-interacting phosphatase (Fragment) OS=Mus musculus OX=10090 GN=Dusp11 PE=1 SV=1;sp|Q6NXK5|DUS11_MOUSE RNA/RNP complex-1-interacting phosphatase OS=Mus musculus OX=10090 GN=Dusp11 PE=2 SV=1	2	1	1	1	1	1	1	1	0	0	1	1	1	1	0	0	1	1	1	1	0	0	12.4	12.4	12.4	16.714	145	145;321	6					4	0.00040975	4.4252	By MS/MS	By MS/MS	By MS/MS	By MS/MS
A0A0J9YUZ4;P63158;A0A0J9YUD8;D3YZ18;D3YVC6	A0A0J9YUZ4;P63158;A0A0J9YUD8;D3YZ18	15;15;14;8;5	15;15;14;8;5	12;12;12;6;3	High mobility group protein B1	Hmgb1	tr|A0A0J9YUZ4|A0A0J9YUZ4_MOUSE High mobility group protein B1 (Fragment) OS=Mus musculus OX=10090 GN=Hmgb1 PE=1 SV=1;sp|P63158|HMGB1_MOUSE High mobility group protein B1 OS=Mus musculus OX=10090 GN=Hmgb1 PE=1 SV=2;tr|A0A0J9YUD8|A0A0J9YUD8_MOUSE High mobili	5	15	15	12	13	13	14	14	14	12	13	13	14	14	14	12	11	11	11	11	11	10	49.3	49.3	37.9	24.233	211	211;215;171;124;92	3.22	96	6	25	58	33	0	242.19	By MS/MS	By MS/MS	By MS/MS	By MS/MS	By MS/MS	By MS/MS
A0A0J9YV20;A0A0R4J0B7;Q80UZ2-2;Q80UZ2;Q80UZ2-3;A0A0J9YU58	A0A0J9YV20;A0A0R4J0B7;Q80UZ2-2;Q80UZ2	13;13;13;13;5;2	13;13;13;13;5;2	13;13;13;13;5;2	Protein SDA1 homolog	Sdad1	tr|A0A0J9YV20|A0A0J9YV20_MOUSE Protein SDA1 OS=Mus musculus OX=10090 GN=Sdad1 PE=1 SV=1;tr|A0A0R4J0B7|A0A0R4J0B7_MOUSE Protein SDA1 OS=Mus musculus OX=10090 GN=Sdad1 PE=1 SV=1;sp|Q80UZ2-2|SDA1_MOUSE Isoform 2 of Protein SDA1 homolog OS=Mus musculus OX=1009	6	13	13	13	13	10	11	11	11	11	13	10	11	11	11	11	13	10	11	11	11	11	20.6	20.6	20.6	79.458	686	686;687;686;687;239;64	3.42	36	17	26	24	16	0	199.18	By MS/MS	By MS/MS	By MS/MS	By MS/MS	By MS/MS	By MS/MS
A0A0J9YV40;Q3V2L1;P97440;D3Z1S0;Q8K2W7	A0A0J9YV40;Q3V2L1;P97440;D3Z1S0;Q8K2W7	2;2;2;1;1	2;2;2;1;1	2;2;2;1;1	Histone RNA hairpin-binding protein	Slbp	tr|A0A0J9YV40|A0A0J9YV40_MOUSE Histone RNA hairpin-binding protein OS=Mus musculus OX=10090 GN=Slbp PE=1 SV=1;tr|Q3V2L1|Q3V2L1_MOUSE Histone RNA hairpin-binding protein OS=Mus musculus OX=10090 GN=Slbp PE=1 SV=1;sp|P97440|SLBP_MOUSE Histone RNA hairpin-bin	5	2	2	2	1	1	1	1	1	1	1	1	1	1	1	1	1	1	1	1	1	1	12.8	12.8	12.8	25.513	219	219;250;275;33;255	5.33			2		4	0.00059324	3.7553	By MS/MS	By MS/MS	By MS/MS	By matching	By MS/MS	By MS/MS
A0A0J9YVC7;D3YWI4;E9Q1I6;F8WHT5;G3UVW1;P19258	A0A0J9YVC7;D3YWI4;E9Q1I6;F8WHT5;G3UVW1;P19258	1;1;1;1;1;1	1;1;1;1;1;1	1;1;1;1;1;1	Protein Mpv17	Mpv17	tr|A0A0J9YVC7|A0A0J9YVC7_MOUSE Protein Mpv17 (Fragment) OS=Mus musculus OX=10090 GN=Mpv17 PE=1 SV=1;tr|D3YWI4|D3YWI4_MOUSE Protein Mpv17 OS=Mus musculus OX=10090 GN=Mpv17 PE=1 SV=1;tr|E9Q1I6|E9Q1I6_MOUSE Protein Mpv17 OS=Mus musculus OX=10090 GN=Mpv17 PE=1	6	1	1	1	1	1	1	1	0	0	1	1	1	1	0	0	1	1	1	1	0	0	10.5	10.5	10.5	11.814	105	105;162;165;170;178;176	6					4	0.001131	3.0835	By MS/MS	By matching	By MS/MS	By MS/MS
F8VPU8;A0A0J9YVH3	F8VPU8;A0A0J9YVH3	1;1	1;1	1;1		AU041133	tr|F8VPU8|F8VPU8_MOUSE Expressed sequence AU041133 OS=Mus musculus OX=10090 GN=AU041133 PE=4 SV=1;tr|A0A0J9YVH3|A0A0J9YVH3_MOUSE Expressed sequence AU041133 OS=Mus musculus OX=10090 GN=AU041133 PE=4 SV=1	2	1	1	1	1	1	1	1	1	1	1	1	1	1	1	1	1	1	1	1	1	1	2	2	2	57.703	497	497;498	2.77	4	5	3	1		0.002212	2.7972	By matching	By MS/MS	By MS/MS	By MS/MS	By MS/MS	By MS/MS
A0A0J9YVJ6;E9Q9A5;G5E8N7;Q9JLV6;Q9JLV6-2;A0A0J9YTV1;A0A140LIZ1	A0A0J9YVJ6;E9Q9A5;G5E8N7;Q9JLV6;Q9JLV6-2	8;8;8;8;5;3;3	8;8;8;8;5;3;3	8;8;8;8;5;3;3	Bifunctional polynucleotide phosphatase/kinase;Polynucleotide 3-phosphatase;Polynucleotide 5-hydroxyl-kinase	Pnkp	tr|A0A0J9YVJ6|A0A0J9YVJ6_MOUSE Bifunctional polynucleotide phosphatase/kinase OS=Mus musculus OX=10090 GN=Pnkp PE=1 SV=1;tr|E9Q9A5|E9Q9A5_MOUSE Bifunctional polynucleotide phosphatase/kinase OS=Mus musculus OX=10090 GN=Pnkp PE=1 SV=1;tr|G5E8N7|G5E8N7_MOUSE	7	8	8	8	4	7	8	6	5	6	4	7	8	6	5	6	4	7	8	6	5	6	20.4	20.4	20.4	46.153	426	426;486;522;522;495;180;255	3.68	19	2	11	23	8	0	24.771	By MS/MS	By MS/MS	By MS/MS	By MS/MS	By MS/MS	By MS/MS
Q9D8I4;A0A0U1RPS1;A0A0U1RPC6;A0A0M3HEP9;J3QMN4;A0A0U1RPV8;A0A0U1RQA4;J3QMQ8;A0A0M3HEQ0;Q9JLT4-3;Q9JLT4-2;Q9JLT4-4;Q9JLT4	Q9D8I4;A0A0U1RPS1;A0A0U1RPC6;A0A0M3HEP9;J3QMN4;A0A0U1RPV8;A0A0U1RQA4;J3QMQ8;A0A0M3HEQ0;Q9JLT4-3;Q9JLT4-2;Q9JLT4-4;Q9JLT4	2;2;2;2;2;2;2;2;2;2;2;2;2	1;1;1;1;1;1;1;1;1;1;1;1;1	1;1;1;1;1;1;1;1;1;1;1;1;1	Thioredoxin reductase 2, mitochondrial	Txnrd2	tr|Q9D8I4|Q9D8I4_MOUSE Thioredoxin reductase 2, mitochondrial OS=Mus musculus OX=10090 GN=Txnrd2 PE=1 SV=1;tr|A0A0U1RPS1|A0A0U1RPS1_MOUSE Thioredoxin reductase 2, mitochondrial (Fragment) OS=Mus musculus OX=10090 GN=Txnrd2 PE=1 SV=1;tr|A0A0U1RPC6|A0A0U1RPC	13	2	1	1	2	2	2	2	1	2	1	1	1	1	0	1	1	1	1	1	0	1	26.7	11.9	11.9	10.805	101	101;123;165;359;491;496;505;522;527;356;491;493;524	4			5			0.0020423	2.8792	By MS/MS	By matching	By MS/MS	By MS/MS	By matching	By MS/MS
A0A0N4SUH4;Q8BKS9;A0A494BBI7;A0A494BB98	A0A0N4SUH4;Q8BKS9;A0A494BBI7;A0A494BB98	16;16;12;9	16;16;12;9	16;16;12;9	Pumilio domain-containing protein KIAA0020	Kiaa0020	tr|A0A0N4SUH4|A0A0N4SUH4_MOUSE Pumilio homolog 3 OS=Mus musculus OX=10090 GN=Pum3 PE=1 SV=1;sp|Q8BKS9|PUM3_MOUSE Pumilio homolog 3 OS=Mus musculus OX=10090 GN=Pum3 PE=1 SV=2;tr|A0A494BBI7|A0A494BBI7_MOUSE Pumilio homolog 3 (Fragment) OS=Mus musculus OX=100	4	16	16	16	12	11	13	13	11	11	12	11	13	13	11	11	12	11	13	13	11	11	23.9	23.9	23.9	72.93	648	648;647;404;300	3.75	30	1	20	21	23	0	130.91	By MS/MS	By MS/MS	By MS/MS	By MS/MS	By MS/MS	By MS/MS
Q9QZ23;A0A0N4SUH8;D3Z285	Q9QZ23;A0A0N4SUH8;D3Z285	5;5;4	5;5;4	5;5;4	NFU1 iron-sulfur cluster scaffold homolog, mitochondrial	Nfu1	sp|Q9QZ23|NFU1_MOUSE NFU1 iron-sulfur cluster scaffold homolog, mitochondrial OS=Mus musculus OX=10090 GN=Nfu1 PE=1 SV=2;tr|A0A0N4SUH8|A0A0N4SUH8_MOUSE NFU1 iron-sulfur cluster scaffold homolog, mitochondrial OS=Mus musculus OX=10090 GN=Nfu1 PE=1 SV=1;tr|D	3	5	5	5	5	4	5	4	4	4	5	4	5	4	4	4	5	4	5	4	4	4	20.8	20.8	20.8	28.567	255	255;256;255	2.63	17		6	4	3	0	100.19	By MS/MS	By MS/MS	By MS/MS	By MS/MS	By MS/MS	By MS/MS
A0A0N4SUM3;Q91V01	A0A0N4SUM3;Q91V01	2;2	2;2	2;2	Lysophospholipid acyltransferase 5	Lpcat3	tr|A0A0N4SUM3|A0A0N4SUM3_MOUSE Lysophospholipid acyltransferase 5 OS=Mus musculus OX=10090 GN=Lpcat3 PE=1 SV=1;sp|Q91V01|MBOA5_MOUSE Lysophospholipid acyltransferase 5 OS=Mus musculus OX=10090 GN=Lpcat3 PE=1 SV=1	2	2	2	2	2	0	1	1	1	2	2	0	1	1	1	2	2	0	1	1	1	2	29.3	29.3	29.3	11.278	99	99;487	4.62		2		5	1	0.00040875	4.3893	By MS/MS		By MS/MS	By MS/MS	By MS/MS	By MS/MS
E9QL12;E9PXU9;A0A0N4SWH3;A0A0N4SWG7;A0A0N4SUN3;A0A0N4SVX9;Q9ESD7;A0A0N4SUJ2;E9Q423;A0A0N4SV63;Q9ESD7-3;Q9ESD7-2	E9QL12;E9PXU9;A0A0N4SWH3;A0A0N4SWG7;A0A0N4SUN3;A0A0N4SVX9;Q9ESD7;A0A0N4SUJ2;E9Q423;A0A0N4SV63;Q9ESD7-3;Q9ESD7-2	9;9;9;9;9;9;9;8;8;8;8;8	9;9;9;9;9;9;9;8;8;8;8;8	9;9;9;9;9;9;9;8;8;8;8;8	Dysferlin	Dysf	tr|E9QL12|E9QL12_MOUSE Dysferlin OS=Mus musculus OX=10090 GN=Dysf PE=1 SV=1;tr|E9PXU9|E9PXU9_MOUSE Dysferlin OS=Mus musculus OX=10090 GN=Dysf PE=1 SV=1;tr|A0A0N4SWH3|A0A0N4SWH3_MOUSE Dysferlin OS=Mus musculus OX=10090 GN=Dysf PE=1 SV=1;tr|A0A0N4SWG7|A0A0N4	12	9	9	9	6	3	2	5	5	2	6	3	2	5	5	2	6	3	2	5	5	2	5.9	5.9	5.9	237.19	2082	2082;2083;2103;2103;2104;2114;2090;2090;2099;2120;2069;2100	4.13		11	1	8	3	0	14.05	By MS/MS	By MS/MS	By MS/MS	By MS/MS	By MS/MS	By MS/MS
A0A0N4SUN4;Q80Y56	A0A0N4SUN4;Q80Y56	2;2	2;2	2;2	Rabenosyn-5	Rbsn	tr|A0A0N4SUN4|A0A0N4SUN4_MOUSE Rabenosyn-5 (Fragment) OS=Mus musculus OX=10090 GN=Rbsn PE=1 SV=1;sp|Q80Y56|RBNS5_MOUSE Rabenosyn-5 OS=Mus musculus OX=10090 GN=Rbsn PE=1 SV=1	2	2	2	2	1	1	1	2	1	1	1	1	1	2	1	1	1	1	1	2	1	1	14.1	14.1	14.1	16.442	142	142;783	5.62				3	5	0.00060741	4.203	By MS/MS	By MS/MS	By MS/MS	By MS/MS	By MS/MS	By MS/MS
A0A0N4SUX5;P17183;D3Z6E4;D3Z2S4;A0A0N4SUI6;D3YVD3	A0A0N4SUX5;P17183;D3Z6E4;D3Z2S4	8;8;7;4;3;3	2;2;2;0;0;0	2;2;2;0;0;0	Gamma-enolase;Enolase	Eno2	tr|A0A0N4SUX5|A0A0N4SUX5_MOUSE Gamma-enolase OS=Mus musculus OX=10090 GN=Eno2 PE=1 SV=1;sp|P17183|ENOG_MOUSE Gamma-enolase OS=Mus musculus OX=10090 GN=Eno2 PE=1 SV=2;tr|D3Z6E4|D3Z6E4_MOUSE Gamma-enolase OS=Mus musculus OX=10090 GN=Eno2 PE=1 SV=1;tr|D3Z2S4|	6	8	2	2	8	7	7	6	6	6	2	1	1	1	1	0	2	1	1	1	1	0	22.3	4.3	4.3	42.68	391	391;434;315;162;58;121	4.83			1	5		0.0023779	2.7163	By MS/MS	By MS/MS	By MS/MS	By MS/MS	By matching	By matching
A0A0N4SV65;A0A0N4SUY3;A0A0N4SWF5;A0A0N4SUU0;A0A0N4SWD7;E9Q6H8;A0A0N4SUV0;A0A0N4SW19;A0A1L1SQF5;A0A0N4SVR9	A0A0N4SV65;A0A0N4SUY3;A0A0N4SWF5;A0A0N4SUU0;A0A0N4SWD7;E9Q6H8	5;5;5;4;4;4;2;2;2;1	5;5;5;4;4;4;2;2;2;1	5;5;5;4;4;4;2;2;2;1		Plekha5	tr|A0A0N4SV65|A0A0N4SV65_MOUSE Pleckstrin homology domain-containing, family A member 5 (Fragment) OS=Mus musculus OX=10090 GN=Plekha5 PE=1 SV=1;tr|A0A0N4SUY3|A0A0N4SUY3_MOUSE Pleckstrin homology domain-containing, family A member 5 (Fragment) OS=Mus muscu	10	5	5	5	1	3	4	1	2	1	1	3	4	1	2	1	1	3	4	1	2	1	9.2	9.2	9.2	74.734	662	662;668;770;956;1000;1269;525;531;596;324	4.77			7	2	4	0	5.5149	By MS/MS	By MS/MS	By MS/MS	By MS/MS	By MS/MS	By MS/MS
A0A0N4SWH0;E9PZ12;A0A0N4SUZ0;Q6RHR9-3;Q6RHR9;Q4VBG2;A0A0R4J0S6;Q6RHR9-2;A0A0N4SUP9	A0A0N4SWH0;E9PZ12;A0A0N4SUZ0;Q6RHR9-3;Q6RHR9;Q4VBG2;A0A0R4J0S6;Q6RHR9-2	13;13;13;13;13;10;10;10;5	13;13;13;13;13;10;10;10;5	12;12;12;12;12;9;9;9;4	Membrane-associated guanylate kinase, WW and PDZ domain-containing protein 1	Magi1	tr|A0A0N4SWH0|A0A0N4SWH0_MOUSE Membrane-associated guanylate kinase, WW and PDZ domain-containing protein 1 OS=Mus musculus OX=10090 GN=Magi1 PE=1 SV=1;tr|E9PZ12|E9PZ12_MOUSE Membrane-associated guanylate kinase, WW and PDZ domain-containing protein 1 OS=M	9	13	13	12	7	8	8	11	8	3	7	8	8	11	8	3	6	7	7	10	7	3	18.8	18.8	18	110.79	1020	1020;1255;1280;1237;1471;1115;1171;1172;496	4.35		12	12	19	5	0	33.913	By MS/MS	By MS/MS	By MS/MS	By MS/MS	By MS/MS	By MS/MS
A0A0N4SV10;A0A0N4SVC4;Q9D4V0	A0A0N4SV10;A0A0N4SVC4;Q9D4V0	3;3;3	3;3;3	3;3;3	Ethanolamine kinase 1	Etnk1	tr|A0A0N4SV10|A0A0N4SV10_MOUSE Ethanolamine kinase 1 OS=Mus musculus OX=10090 GN=Etnk1 PE=1 SV=1;tr|A0A0N4SVC4|A0A0N4SVC4_MOUSE Ethanolamine kinase 1 OS=Mus musculus OX=10090 GN=Etnk1 PE=1 SV=1;sp|Q9D4V0|EKI1_MOUSE Ethanolamine kinase 1 OS=Mus musculus OX=	3	3	3	3	1	1	1	2	2	2	1	1	1	2	2	2	1	1	1	2	2	2	14	14	14	38.32	336	336;373;363	4.64		3	3		5	0	13.145	By matching	By matching	By MS/MS	By MS/MS	By MS/MS	By MS/MS
A0A0N4SV29;Q80V62;Q80V62-2	A0A0N4SV29;Q80V62	4;4;1	4;4;1	4;4;1	Fanconi anemia group D2 protein homolog	Fancd2	tr|A0A0N4SV29|A0A0N4SV29_MOUSE Fanconi anemia group D2 protein homolog OS=Mus musculus OX=10090 GN=Fancd2 PE=1 SV=1;sp|Q80V62|FACD2_MOUSE Fanconi anemia group D2 protein homolog OS=Mus musculus OX=10090 GN=Fancd2 PE=1 SV=2	3	4	4	4	3	3	3	2	3	4	3	3	3	2	3	4	3	3	3	2	3	4	4	4	4	162.11	1437	1437;1450;129	4.1		5	8	7		0	23.839	By MS/MS	By MS/MS	By MS/MS	By MS/MS	By MS/MS	By MS/MS
A0A0N4SV66;C0HKE9;C0HKE8;C0HKE7;C0HKE6;C0HKE5;C0HKE4;C0HKE3;C0HKE2;C0HKE1;Q8CGP6;Q8R1M2;Q8CGP7;Q8CGP5;Q8BFU2;Q8CGP4	A0A0N4SV66;C0HKE9;C0HKE8;C0HKE7;C0HKE6;C0HKE5;C0HKE4;C0HKE3;C0HKE2;C0HKE1;Q8CGP6;Q8R1M2;Q8CGP7;Q8CGP5;Q8BFU2;Q8CGP4	7;7;7;7;7;7;7;7;7;7;7;7;7;7;7;6	5;5;5;5;5;5;5;5;5;5;5;5;5;5;5;4	1;1;1;1;1;1;1;1;1;1;1;1;1;1;1;1	Histone H2A type 1-H;Histone H2A.J;Histone H2A type 1-K;Histone H2A type 1-F;Histone H2A type 3;Histone H2A	Hist1h2ah;H2afj;Hist1h2ak;Hist1h2af;Hist3h2a;Hist1h2aa	tr|A0A0N4SV66|A0A0N4SV66_MOUSE Histone H2A OS=Mus musculus OX=10090 GN=H2afj PE=1 SV=1;sp|C0HKE9|H2A1P_MOUSE Histone H2A type 1-P OS=Mus musculus OX=10090 GN=Hist1h2ap PE=1 SV=1;sp|C0HKE8|H2A1O_MOUSE Histone H2A type 1-O OS=Mus musculus OX=10090 GN=Hist1h2	16	7	5	1	6	6	6	7	6	6	4	4	4	5	4	4	1	1	1	1	1	1	61.9	61.9	18.3	13.66	126	126;130;130;130;130;130;130;130;130;130;128;129;130;130;130;129	2.47	80	16	6	6	24	0	323.31	By MS/MS	By MS/MS	By MS/MS	By MS/MS	By MS/MS	By MS/MS
A0A0N4SVC2;E9QP00;Q6PFR5	A0A0N4SVC2;E9QP00;Q6PFR5	3;3;3	3;3;3	3;3;3	Transformer-2 protein homolog alpha	Tra2a	tr|A0A0N4SVC2|A0A0N4SVC2_MOUSE Transformer-2 protein homolog alpha OS=Mus musculus OX=10090 GN=Tra2a PE=1 SV=1;tr|E9QP00|E9QP00_MOUSE Transformer-2 protein homolog alpha OS=Mus musculus OX=10090 GN=Tra2a PE=1 SV=1;sp|Q6PFR5|TRA2A_MOUSE Transformer-2 protei	3	3	3	3	2	3	3	2	2	2	2	3	3	2	2	2	2	3	3	2	2	2	9.3	9.3	9.3	32.259	280	280;282;281	2.61	18			5	5	0	16.55	By MS/MS	By MS/MS	By MS/MS	By MS/MS	By MS/MS	By MS/MS
A0A0N4SVE1;F7B2B4;Q9D1K2	A0A0N4SVE1;F7B2B4;Q9D1K2	2;2;2	2;2;2	2;2;2	V-type proton ATPase subunit F	Atp6v1f	tr|A0A0N4SVE1|A0A0N4SVE1_MOUSE V-type proton ATPase subunit F OS=Mus musculus OX=10090 GN=Atp6v1f PE=1 SV=1;tr|F7B2B4|F7B2B4_MOUSE V-type proton ATPase subunit F (Fragment) OS=Mus musculus OX=10090 GN=Atp6v1f PE=1 SV=1;sp|Q9D1K2|VATF_MOUSE V-type proton AT	3	2	2	2	2	2	2	2	2	2	2	2	2	2	2	2	2	2	2	2	2	2	28.2	28.2	28.2	8.1613	71	71;100;119	3.78	6		6	9	2	0.00058525	3.5616	By MS/MS	By MS/MS	By MS/MS	By MS/MS	By MS/MS	By MS/MS
Z4YKC4;A0A0R4J112;A2AMI2;A0A0N4SVL0;Q80XI3-2;Q80XI3-4;Q80XI3;Q80XI3-3;A2AMI7	Z4YKC4;A0A0R4J112;A2AMI2;A0A0N4SVL0;Q80XI3-2;Q80XI3-4;Q80XI3;Q80XI3-3;A2AMI7	19;19;19;19;19;19;19;19;17	14;14;14;14;14;14;14;14;12	14;14;14;14;14;14;14;14;12	Eukaryotic translation initiation factor 4 gamma 3	Eif4g3	tr|Z4YKC4|Z4YKC4_MOUSE Eukaryotic translation initiation factor 4 gamma 3 OS=Mus musculus OX=10090 GN=Eif4g3 PE=1 SV=1;tr|A0A0R4J112|A0A0R4J112_MOUSE Eukaryotic translation initiation factor 4 gamma 3 OS=Mus musculus OX=10090 GN=Eif4g3 PE=1 SV=1;tr|A2AMI2|	9	19	14	14	16	12	15	14	12	13	11	8	11	10	8	9	11	8	11	10	8	9	16.1	13	13	173.55	1567	1567;1578;1579;1762;1560;1578;1579;1590;1002	4.39	10	12	8	22	25	0	45.712	By MS/MS	By MS/MS	By MS/MS	By MS/MS	By MS/MS	By MS/MS
A0A0N4SVL9;Q9CQR6;A0A0N4SVE2;A0A0N4SW66	A0A0N4SVL9;Q9CQR6	7;7;2;1	7;7;2;1	7;7;2;1	Serine/threonine-protein phosphatase 6 catalytic subunit;Serine/threonine-protein phosphatase 6 catalytic subunit, N-terminally processed	Ppp6c	tr|A0A0N4SVL9|A0A0N4SVL9_MOUSE Serine/threonine-protein phosphatase OS=Mus musculus OX=10090 GN=Ppp6c PE=1 SV=1;sp|Q9CQR6|PPP6_MOUSE Serine/threonine-protein phosphatase 6 catalytic subunit OS=Mus musculus OX=10090 GN=Ppp6c PE=1 SV=1	4	7	7	7	6	7	6	7	4	4	6	7	6	7	4	4	6	7	6	7	4	4	26.5	26.5	26.5	32.547	283	283;305;81;83	3.72	21	4	10		25	0	26.849	By MS/MS	By MS/MS	By MS/MS	By MS/MS	By MS/MS	By MS/MS
A0A0N4SW69;A0A0N4SVN0;E9Q026;A0A0N4SW93;Q7TPS5-2;Q7TPS5	A0A0N4SW69;A0A0N4SVN0;E9Q026;A0A0N4SW93;Q7TPS5-2;Q7TPS5	1;1;1;1;1;1	1;1;1;1;1;1	1;1;1;1;1;1	C2 domain-containing protein 5	C2cd5	tr|A0A0N4SW69|A0A0N4SW69_MOUSE C2 domain-containing protein 5 OS=Mus musculus OX=10090 GN=C2cd5 PE=1 SV=1;tr|A0A0N4SVN0|A0A0N4SVN0_MOUSE C2 domain-containing protein 5 (Fragment) OS=Mus musculus OX=10090 GN=C2cd5 PE=1 SV=3;tr|E9Q026|E9Q026_MOUSE C2 domain-	6	1	1	1	0	1	1	1	1	1	0	1	1	1	1	1	0	1	1	1	1	1	17.1	17.1	17.1	8.1054	70	70;232;999;1052;990;1016	6					5	0.0023762	2.715		By MS/MS	By MS/MS	By MS/MS	By MS/MS	By matching
F6QKD2;A0A0N4SVT1;Q9CWX9;A0A0N4SWC5;A0A0N4SV55;A0A0N4SVK2;D3YWF9	F6QKD2;A0A0N4SVT1;Q9CWX9;A0A0N4SWC5	6;6;6;3;2;2;1	6;6;6;3;2;2;1	6;6;6;3;2;2;1	Probable ATP-dependent RNA helicase DDX47	Ddx47	tr|F6QKD2|F6QKD2_MOUSE Probable ATP-dependent RNA helicase DDX47 (Fragment) OS=Mus musculus OX=10090 GN=Ddx47 PE=1 SV=1;tr|A0A0N4SVT1|A0A0N4SVT1_MOUSE Probable ATP-dependent RNA helicase DDX47 (Fragment) OS=Mus musculus OX=10090 GN=Ddx47 PE=1 SV=1;sp|Q9CWX	7	6	6	6	5	5	6	6	4	6	5	5	6	6	4	6	5	5	6	6	4	6	16.4	16.4	16.4	39.913	360	360;380;455;180;62;196;138	3.94	15	6		6	21	0	32.135	By MS/MS	By MS/MS	By MS/MS	By MS/MS	By MS/MS	By MS/MS
A0A0N4SVT3;A0A0N4SW28;Q9DAS9	A0A0N4SVT3;A0A0N4SW28;Q9DAS9	2;2;2	2;2;2	2;2;2	Guanine nucleotide-binding protein G(I)/G(S)/G(O) subunit gamma-12	Gng12	tr|A0A0N4SVT3|A0A0N4SVT3_MOUSE Guanine nucleotide-binding protein subunit gamma (Fragment) OS=Mus musculus OX=10090 GN=Gng12 PE=1 SV=1;tr|A0A0N4SW28|A0A0N4SW28_MOUSE Guanine nucleotide-binding protein subunit gamma OS=Mus musculus OX=10090 GN=Gng12 PE=1 SV	3	2	2	2	1	1	1	2	1	0	1	1	1	2	1	0	1	1	1	2	1	0	38.5	38.5	38.5	7.1971	65	65;83;72	4.67			2	4		0.00096302	3.3802	By MS/MS	By MS/MS	By MS/MS	By MS/MS	By matching
A0A0N4SW50;Q91VX9	A0A0N4SW50;Q91VX9	1;1	1;1	1;1	Transmembrane protein 168	Tmem168	tr|A0A0N4SW50|A0A0N4SW50_MOUSE RIKEN cDNA 8430437G11, isoform CRA_b OS=Mus musculus OX=10090 GN=Tmem168 PE=1 SV=1;sp|Q91VX9|TM168_MOUSE Transmembrane protein 168 OS=Mus musculus OX=10090 GN=Tmem168 PE=1 SV=1	2	1	1	1	1	1	1	1	1	1	1	1	1	1	1	1	1	1	1	1	1	1	4.8	4.8	4.8	35.587	313	313;697	3		6				0.0023749	2.7039	By MS/MS	By MS/MS	By MS/MS	By MS/MS	By MS/MS	By MS/MS
A0A0N4SW73;Q8R361	A0A0N4SW73;Q8R361	5;4	5;4	5;4	Rab11 family-interacting protein 5	Rab11fip5	tr|A0A0N4SW73|A0A0N4SW73_MOUSE Rab11 family-interacting protein 5 OS=Mus musculus OX=10090 GN=Rab11fip5 PE=1 SV=1;sp|Q8R361|RFIP5_MOUSE Rab11 family-interacting protein 5 OS=Mus musculus OX=10090 GN=Rab11fip5 PE=1 SV=2	2	5	5	5	4	3	3	2	3	1	4	3	3	2	3	1	4	3	3	2	3	1	8.3	8.3	8.3	139.55	1318	1318;645	4.06		7	2	8		0	20.107	By MS/MS	By MS/MS	By MS/MS	By MS/MS	By MS/MS	By matching
A0A0N4SW94;O35682	A0A0N4SW94;O35682	1;1	1;1	1;1	Myeloid-associated differentiation marker	Myadm	tr|A0A0N4SW94|A0A0N4SW94_MOUSE Myeloid-associated differentiation marker (Fragment) OS=Mus musculus OX=10090 GN=Myadm PE=1 SV=1;sp|O35682|MYADM_MOUSE Myeloid-associated differentiation marker OS=Mus musculus OX=10090 GN=Myadm PE=1 SV=2	2	1	1	1	1	0	0	0	1	1	1	0	0	0	1	1	1	0	0	0	1	1	21	21	21	8.6402	81	81;320	3		4				0.0049734	2.3453	By MS/MS				By MS/MS	By MS/MS
A0A0N5E9G7;G3X8Z6;Q5U4B1;G3UWX1;P35601-2;P35601;A0A0N4SVN6	A0A0N5E9G7;G3X8Z6;Q5U4B1;G3UWX1;P35601-2;P35601	19;19;19;19;19;19;4	19;19;19;19;19;19;4	19;19;19;19;19;19;4	Replication factor C subunit 1	Rfc1	tr|A0A0N5E9G7|A0A0N5E9G7_MOUSE Replication factor C subunit 1 OS=Mus musculus OX=10090 GN=Rfc1 PE=1 SV=1;tr|G3X8Z6|G3X8Z6_MOUSE Replication factor C subunit 1 OS=Mus musculus OX=10090 GN=Rfc1 PE=1 SV=1;tr|Q5U4B1|Q5U4B1_MOUSE Replication factor C subunit 1	7	19	19	19	17	17	16	16	17	12	17	17	16	16	17	12	17	17	16	16	17	12	20.2	20.2	20.2	125.86	1130	1130;1131;1132;1145;1130;1131;212	3.57	32	38	32	29	20	0	108.9	By MS/MS	By MS/MS	By MS/MS	By MS/MS	By MS/MS	By MS/MS
A0A0R3P9C8;Q9DC69	A0A0R3P9C8;Q9DC69	1;1	1;1	1;1	NADH dehydrogenase [ubiquinone] 1 alpha subcomplex subunit 9, mitochondrial	Ndufa9	tr|A0A0R3P9C8|A0A0R3P9C8_MOUSE NADH dehydrogenase [ubiquinone] 1 alpha subcomplex subunit 9, mitochondrial OS=Mus musculus OX=10090 GN=Ndufa9 PE=1 SV=1;sp|Q9DC69|NDUA9_MOUSE NADH dehydrogenase [ubiquinone] 1 alpha subcomplex subunit 9, mitochondrial OS=Mus	2	1	1	1	1	0	1	1	1	0	1	0	1	1	1	0	1	0	1	1	1	0	3.5	3.5	3.5	42.121	373	373;377	5				8		0.0081939	2.088	By MS/MS		By MS/MS	By MS/MS	By MS/MS
E9Q8A0;A0A0R3P9D3;D3YY67;Q5U4E2	E9Q8A0;A0A0R3P9D3;D3YY67;Q5U4E2	1;1;1;1	1;1;1;1	1;1;1;1	Replication initiator 1	Repin1	tr|E9Q8A0|E9Q8A0_MOUSE Replication initiator 1 (Fragment) OS=Mus musculus OX=10090 GN=Repin1 PE=1 SV=1;tr|A0A0R3P9D3|A0A0R3P9D3_MOUSE Replication initiator 1 OS=Mus musculus OX=10090 GN=Repin1 PE=1 SV=1;tr|D3YY67|D3YY67_MOUSE Replication initiator 1 OS=Mus	4	1	1	1	1	1	0	1	1	0	1	1	0	1	1	0	1	1	0	1	1	0	4.7	4.7	4.7	40.518	360	360;598;601;545	5				4		0.0048043	2.3607	By MS/MS	By matching		By MS/MS	By matching
A0A0R4IZW5;P09803	A0A0R4IZW5;P09803	9;9	9;9	9;9	Cadherin-1;E-Cad/CTF1;E-Cad/CTF2;E-Cad/CTF3	Cdh1	tr|A0A0R4IZW5|A0A0R4IZW5_MOUSE Cadherin 1, isoform CRA_b OS=Mus musculus OX=10090 GN=Cdh1 PE=1 SV=1;sp|P09803|CADH1_MOUSE Cadherin-1 OS=Mus musculus OX=10090 GN=Cdh1 PE=1 SV=1	2	9	9	9	9	5	7	6	6	5	9	5	7	6	6	5	9	5	7	6	6	5	16.1	16.1	16.1	98.283	884	884;884	3.09	15	25	6	7	5	0	32.019	By MS/MS	By MS/MS	By MS/MS	By MS/MS	By MS/MS	By MS/MS
A0A0R4IZW6;G3X9U5;Q99J78;Q99J78-2;A0A1D5RMG5;D3YWV3	A0A0R4IZW6;G3X9U5;Q99J78;Q99J78-2;A0A1D5RMG5;D3YWV3	2;2;2;2;1;1	2;2;2;2;1;1	2;2;2;2;1;1	Differentially expressed in FDCP 8	Def8	tr|A0A0R4IZW6|A0A0R4IZW6_MOUSE Differentially-expressed in FDCP 8 OS=Mus musculus OX=10090 GN=Def8 PE=1 SV=1;tr|G3X9U5|G3X9U5_MOUSE Differentially expressed in FDCP 8, isoform CRA_c OS=Mus musculus OX=10090 GN=Def8 PE=1 SV=1;sp|Q99J78|DEFI8_MOUSE Different	6	2	2	2	1	1	1	1	2	1	1	1	1	1	2	1	1	1	1	1	2	1	4.3	4.3	4.3	53.629	460	460;472;448;483;121;218	4.43		2		5		0.0020465	2.8993	By MS/MS	By matching	By MS/MS	By MS/MS	By MS/MS	By MS/MS
H3BKS8;E9PWD4;A0A0R4IZW7;Q3TX08;G3V019;H3BK68;D3Z413;H3BL70;H3BKB8	H3BKS8;E9PWD4;A0A0R4IZW7;Q3TX08	3;3;3;3;1;1;1;1;1	3;3;3;3;1;1;1;1;1	3;3;3;3;1;1;1;1;1	tRNA (guanine(26)-N(2))-dimethyltransferase	Trmt1	tr|H3BKS8|H3BKS8_MOUSE tRNA (guanine(26)-N(2))-dimethyltransferase OS=Mus musculus OX=10090 GN=Trmt1 PE=1 SV=1;tr|E9PWD4|E9PWD4_MOUSE tRNA (guanine(26)-N(2))-dimethyltransferase OS=Mus musculus OX=10090 GN=Trmt1 PE=1 SV=1;tr|A0A0R4IZW7|A0A0R4IZW7_MOUSE tRN	9	3	3	3	3	1	3	3	3	2	3	1	3	3	3	2	3	1	3	3	3	2	10.1	10.1	10.1	69.432	634	634;656;663;663;205;221;242;260;262	4.33		5		10		0	8.3728	By MS/MS	By MS/MS	By MS/MS	By MS/MS	By MS/MS	By MS/MS
A0A0R4IZW8;O88456;A0A0R4J1C2;Q9D7J7	A0A0R4IZW8;O88456;A0A0R4J1C2	5;5;4;2	5;5;4;2	5;5;4;2	Calpain small subunit 1	Capns1	tr|A0A0R4IZW8|A0A0R4IZW8_MOUSE Calpain small subunit 1 OS=Mus musculus OX=10090 GN=Capns1 PE=1 SV=1;sp|O88456|CPNS1_MOUSE Calpain small subunit 1 OS=Mus musculus OX=10090 GN=Capns1 PE=1 SV=1;tr|A0A0R4J1C2|A0A0R4J1C2_MOUSE Calpain small subunit 1 OS=Mus mus	4	5	5	5	4	5	4	4	4	3	4	5	4	4	4	3	4	5	4	4	4	3	17.2	17.2	17.2	28.406	268	268;269;200;247	3.39	22	19	10	6	17	0	22.032	By MS/MS	By MS/MS	By MS/MS	By MS/MS	By MS/MS	By MS/MS
A0A0R4IZW9;Q9DCT5	A0A0R4IZW9;Q9DCT5	2;2	2;2	2;2	Stromal cell-derived factor 2	Sdf2	tr|A0A0R4IZW9|A0A0R4IZW9_MOUSE Stromal cell-derived factor 2 OS=Mus musculus OX=10090 GN=Sdf2 PE=1 SV=1;sp|Q9DCT5|SDF2_MOUSE Stromal cell-derived factor 2 OS=Mus musculus OX=10090 GN=Sdf2 PE=1 SV=1	2	2	2	2	2	1	2	1	1	0	2	1	2	1	1	0	2	1	2	1	1	0	10.5	10.5	10.5	23.991	219	219;211	3.92	4			5	3	0.00096098	3.3501	By MS/MS	By MS/MS	By MS/MS	By MS/MS	By MS/MS
A0A0R4IZX6;A0A0R4J1L4;Q9WVP1;Q9WVP1-2;A0A1L1SUA0;A0A1L1SQU9	A0A0R4IZX6;A0A0R4J1L4;Q9WVP1;Q9WVP1-2;A0A1L1SUA0	7;7;7;7;4;2	5;5;5;5;2;2	5;5;5;5;2;2	AP-1 complex subunit mu-2	Ap1m2	tr|A0A0R4IZX6|A0A0R4IZX6_MOUSE AP-1 complex subunit mu-2 OS=Mus musculus OX=10090 GN=Ap1m2 PE=1 SV=1;tr|A0A0R4J1L4|A0A0R4J1L4_MOUSE AP-1 complex subunit mu-2 OS=Mus musculus OX=10090 GN=Ap1m2 PE=1 SV=1;sp|Q9WVP1|AP1M2_MOUSE AP-1 complex subunit mu-2 OS=Mus	6	7	5	5	5	5	3	3	5	6	3	4	2	2	4	4	3	4	2	2	4	4	18.2	13.9	13.9	48.15	423	423;425;423;425;224;195	3.74	12		4	9	9	0	12.265	By MS/MS	By MS/MS	By MS/MS	By MS/MS	By MS/MS	By MS/MS
A0A0R4IZY0;Q8C1A5	A0A0R4IZY0;Q8C1A5	23;23	23;23	23;23	Thimet oligopeptidase	Thop1	tr|A0A0R4IZY0|A0A0R4IZY0_MOUSE Thimet oligopeptidase OS=Mus musculus OX=10090 GN=Thop1 PE=1 SV=1;sp|Q8C1A5|THOP1_MOUSE Thimet oligopeptidase OS=Mus musculus OX=10090 GN=Thop1 PE=1 SV=1	2	23	23	23	20	16	20	19	19	21	20	16	20	19	19	21	20	16	20	19	19	21	36	36	36	78.026	687	687;687	3.37	82	20	23	39	47	0	133.77	By MS/MS	By MS/MS	By MS/MS	By MS/MS	By MS/MS	By MS/MS
A0A0R4IZY9;Q91XI1;Q91XI1-2	A0A0R4IZY9;Q91XI1;Q91XI1-2	9;8;6	9;8;6	9;8;6	tRNA-dihydrouridine(47) synthase [NAD(P)(+)]-like	Dus3l	tr|A0A0R4IZY9|A0A0R4IZY9_MOUSE tRNA-dihydrouridine(47) synthase [NAD(P)(+)] OS=Mus musculus OX=10090 GN=Dus3l PE=1 SV=1;sp|Q91XI1|DUS3L_MOUSE tRNA-dihydrouridine(47) synthase [NAD(P)(+)]-like OS=Mus musculus OX=10090 GN=Dus3l PE=1 SV=1;sp|Q91XI1-2|DUS3L_MO	3	9	9	9	8	5	6	7	5	5	8	5	6	7	5	5	8	5	6	7	5	5	19.8	19.8	19.8	71.15	637	637;637;426	3.08	26	5	10	7	11	0	33.827	By MS/MS	By MS/MS	By MS/MS	By MS/MS	By MS/MS	By MS/MS
A0A0R4IZZ6;Q6ZQ03;Q6ZQ03-2;Q6ZQ03-3	A0A0R4IZZ6;Q6ZQ03;Q6ZQ03-2;Q6ZQ03-3	8;8;5;5	8;8;5;5	8;8;5;5	Formin-binding protein 4	Fnbp4	tr|A0A0R4IZZ6|A0A0R4IZZ6_MOUSE Formin-binding protein 4 OS=Mus musculus OX=10090 GN=Fnbp4 PE=1 SV=1;sp|Q6ZQ03|FNBP4_MOUSE Formin-binding protein 4 OS=Mus musculus OX=10090 GN=Fnbp4 PE=1 SV=2;sp|Q6ZQ03-2|FNBP4_MOUSE Isoform 2 of Formin-binding protein 4 OS=	4	8	8	8	7	5	7	8	5	5	7	5	7	8	5	5	7	5	7	8	5	5	9.7	9.7	9.7	116.31	1077	1077;1031;622;630	3.62	12	9	17	3	11	0	23.855	By MS/MS	By MS/MS	By MS/MS	By MS/MS	By MS/MS	By MS/MS
A0A0R4J005;E9QP62;Q99JW4;Q9D7B2;Q91XD2;A0A286YCS7	A0A0R4J005;E9QP62;Q99JW4;Q9D7B2	7;7;7;5;3;1	7;7;7;5;3;1	7;7;7;5;3;1	LIM and senescent cell antigen-like-containing domain protein 1	Lims1	tr|A0A0R4J005|A0A0R4J005_MOUSE LIM and senescent cell antigen-like-containing domain protein OS=Mus musculus OX=10090 GN=Lims1 PE=1 SV=1;tr|E9QP62|E9QP62_MOUSE LIM and senescent cell antigen-like-containing domain protein OS=Mus musculus OX=10090 GN=Lims1	6	7	7	7	6	6	5	6	6	3	6	6	5	6	6	3	6	6	5	6	6	3	20.8	20.8	20.8	38.387	337	337;387;325;396;341;206	4.83	9		2	20	28	0	17.819	By MS/MS	By MS/MS	By MS/MS	By MS/MS	By MS/MS	By MS/MS
A0A0R4J007;P70261	A0A0R4J007;P70261	7;7	7;7	7;7	Paladin	Pald1	tr|A0A0R4J007|A0A0R4J007_MOUSE Paladin OS=Mus musculus OX=10090 GN=Pald1 PE=1 SV=1;sp|P70261|PALD_MOUSE Paladin OS=Mus musculus OX=10090 GN=Pald1 PE=1 SV=1	2	7	7	7	5	3	3	4	2	4	5	3	3	4	2	4	5	3	3	4	2	4	8.8	8.8	8.8	96.763	859	859;859	3.68	6	7	8	5	5	0	11.401	By MS/MS	By MS/MS	By MS/MS	By MS/MS	By MS/MS	By MS/MS
P70288;A0A0R4J008;Q8BQ10	P70288;A0A0R4J008;Q8BQ10	8;8;6	4;4;3	4;4;3	Histone deacetylase 2	Hdac2	sp|P70288|HDAC2_MOUSE Histone deacetylase 2 OS=Mus musculus OX=10090 GN=Hdac2 PE=1 SV=1;tr|A0A0R4J008|A0A0R4J008_MOUSE Histone deacetylase OS=Mus musculus OX=10090 GN=Hdac2 PE=1 SV=1;tr|Q8BQ10|Q8BQ10_MOUSE Histone deacetylase 2 OS=Mus musculus OX=10090 GN=	3	8	4	4	7	6	6	6	4	6	3	2	2	2	1	3	3	2	2	2	1	3	21.5	13.7	13.7	55.302	488	488;488;304	4.93	5		1	2	19	0	12.829	By MS/MS	By MS/MS	By MS/MS	By MS/MS	By matching	By MS/MS
A0A1W2P6E1;A0A0R4J009;Q9D864	A0A1W2P6E1;A0A0R4J009;Q9D864	1;1;1	1;1;1	1;1;1	Actin-related protein 6	Actr6	tr|A0A1W2P6E1|A0A1W2P6E1_MOUSE Actin-related protein 6 OS=Mus musculus OX=10090 GN=Actr6 PE=1 SV=1;tr|A0A0R4J009|A0A0R4J009_MOUSE Actin-related protein 6 OS=Mus musculus OX=10090 GN=Actr6 PE=1 SV=1;sp|Q9D864|ARP6_MOUSE Actin-related protein 6 OS=Mus muscul	3	1	1	1	1	0	1	1	0	0	1	0	1	1	0	0	1	0	1	1	0	0	14.8	14.8	14.8	10.189	88	88;396;396	3.33		2	1			0	12.751	By MS/MS		By MS/MS	By matching
E9PWE4;A0A0R4J011;E9PVV1;E9PWE2;F6T941;E9PWE3;E9PWE5;E9PVV2;A0A0R4J014;P15806-2;P15806	E9PWE4;A0A0R4J011;E9PVV1;E9PWE2;F6T941;E9PWE3;E9PWE5;E9PVV2;A0A0R4J014;P15806-2;P15806	3;3;3;3;2;2;2;2;2;2;2	3;3;3;3;2;2;2;2;2;2;2	3;3;3;3;2;2;2;2;2;2;2	Transcription factor E2-alpha	Tcf3	tr|E9PWE4|E9PWE4_MOUSE Transcription factor E2-alpha OS=Mus musculus OX=10090 GN=Tcf3 PE=1 SV=1;tr|A0A0R4J011|A0A0R4J011_MOUSE Transcription factor E2-alpha OS=Mus musculus OX=10090 GN=Tcf3 PE=1 SV=1;tr|E9PVV1|E9PVV1_MOUSE Transcription factor E2-alpha OS=	11	3	3	3	3	1	2	1	2	1	3	1	2	1	2	1	3	1	2	1	2	1	9.9	9.9	9.9	67.458	648	648;649;650;653;638;645;648;649;652;648;651	5.3				7	3	0	10.636	By MS/MS	By matching	By MS/MS	By MS/MS	By MS/MS	By MS/MS
A0A0R4J016;Q32M08	A0A0R4J016;Q32M08	1;1	1;1	1;1	tRNA-dihydrouridine(20a/20b) synthase [NAD(P)+]-like	Dus4l	tr|A0A0R4J016|A0A0R4J016_MOUSE tRNA-dihydrouridine synthase OS=Mus musculus OX=10090 GN=Dus4l PE=1 SV=1;sp|Q32M08|DUS4L_MOUSE tRNA-dihydrouridine(20a/20b) synthase [NAD(P)+]-like OS=Mus musculus OX=10090 GN=Dus4l PE=2 SV=1	2	1	1	1	1	0	1	0	1	0	1	0	1	0	1	0	1	0	1	0	1	0	4.3	4.3	4.3	36.65	324	324;324	3.67		1	2			0.0048026	2.3545	By MS/MS		By MS/MS		By matching
A0A0R4J018;O55060;D3Z380;D3Z0R1;D3Z217;D6RIK3;D3YWK6	A0A0R4J018;O55060;D3Z380	3;3;2;1;1;1;1	3;3;2;1;1;1;1	3;3;2;1;1;1;1	Thiopurine S-methyltransferase	Tpmt	tr|A0A0R4J018|A0A0R4J018_MOUSE Thiopurine S-methyltransferase OS=Mus musculus OX=10090 GN=Tpmt PE=1 SV=1;sp|O55060|TPMT_MOUSE Thiopurine S-methyltransferase OS=Mus musculus OX=10090 GN=Tpmt PE=1 SV=1;tr|D3Z380|D3Z380_MOUSE Thiopurine S-methyltransferase OS	7	3	3	3	3	1	2	2	3	2	3	1	2	2	3	2	3	1	2	2	3	2	12.1	12.1	12.1	27.571	240	240;240;205;93;182;188;188	5.53	1			2	12	0	6.2538	By MS/MS	By MS/MS	By MS/MS	By MS/MS	By MS/MS	By MS/MS
A0A0R4J1Y0;A0A0R4J024;Q924T3-2;Q924T3	A0A0R4J1Y0;A0A0R4J024;Q924T3-2;Q924T3	3;3;3;3	3;3;3;3	3;3;3;3	DNA repair protein XRCC4	Xrcc4	tr|A0A0R4J1Y0|A0A0R4J1Y0_MOUSE DNA repair protein XRCC4 OS=Mus musculus OX=10090 GN=Xrcc4 PE=1 SV=1;tr|A0A0R4J024|A0A0R4J024_MOUSE DNA repair protein XRCC4 OS=Mus musculus OX=10090 GN=Xrcc4 PE=1 SV=1;sp|Q924T3-2|XRCC4_MOUSE Isoform 2 of DNA repair protein	4	3	3	3	3	2	1	2	2	1	3	2	1	2	2	1	3	2	1	2	2	1	8.3	8.3	8.3	35.752	314	314;326;314;326	4.31		4	3	4	2	0.00021336	5.0749	By MS/MS	By MS/MS	By MS/MS	By MS/MS	By MS/MS	By MS/MS
A0A0R4J034;Q99K01;Q99K01-2;Q99K01-4;Q99K01-3;D3YZA7;Q99K01-5	A0A0R4J034;Q99K01;Q99K01-2;Q99K01-4;Q99K01-3	11;11;11;11;10;2;1	11;11;11;11;10;2;1	11;11;11;11;10;2;1	Pyridoxal-dependent decarboxylase domain-containing protein 1	Pdxdc1	tr|A0A0R4J034|A0A0R4J034_MOUSE MCG129810, isoform CRA_c OS=Mus musculus OX=10090 GN=Pdxdc1 PE=1 SV=1;sp|Q99K01|PDXD1_MOUSE Pyridoxal-dependent decarboxylase domain-containing protein 1 OS=Mus musculus OX=10090 GN=Pdxdc1 PE=1 SV=2;sp|Q99K01-2|PDXD1_MOUSE Is	7	11	11	11	9	7	10	9	6	6	9	7	10	9	6	6	9	7	10	9	6	6	18.4	18.4	18.4	87.479	789	789;787;788;793;710;378;384	3.29	22	18	16	21	3	0	37.667	By MS/MS	By MS/MS	By MS/MS	By MS/MS	By MS/MS	By MS/MS
A0A0R4J036;P08553	A0A0R4J036;P08553	4;4	2;2	2;2	Neurofilament medium polypeptide	Nefm	tr|A0A0R4J036|A0A0R4J036_MOUSE Neurofilament 3, medium OS=Mus musculus OX=10090 GN=Nefm PE=1 SV=1;sp|P08553|NFM_MOUSE Neurofilament medium polypeptide OS=Mus musculus OX=10090 GN=Nefm PE=1 SV=4	2	4	2	2	1	1	2	4	3	2	0	0	0	2	2	1	0	0	0	2	2	1	5.4	2.9	2.9	95.94	848	848;848	3.6		2	3			0	6.8047	By matching	By matching	By matching	By MS/MS	By MS/MS	By matching
A0A0R4J041;Q8C3P7;G5E922;G3UZP2;G3UXX7;Q8C3P7-2;G3UYB5;G3UY98;G3UX68	A0A0R4J041;Q8C3P7;G5E922;G3UZP2;G3UXX7;Q8C3P7-2	10;9;8;7;7;5;3;1;1	10;9;8;7;7;5;3;1;1	10;9;8;7;7;5;3;1;1	N6-adenosine-methyltransferase subunit METTL3	Mettl3	tr|A0A0R4J041|A0A0R4J041_MOUSE N6-adenosine-methyltransferase subunit METTL3 OS=Mus musculus OX=10090 GN=Mettl3 PE=1 SV=1;sp|Q8C3P7|MTA70_MOUSE N6-adenosine-methyltransferase subunit METTL3 OS=Mus musculus OX=10090 GN=Mettl3 PE=1 SV=2;tr|G5E922|G5E922_MOUS	9	10	10	10	9	7	8	9	7	5	9	7	8	9	7	5	9	7	8	9	7	5	26	26	26	64.629	580	580;580;335;245;245;448;153;36;37	3.62	12	14	15	18	4	0	76.05	By MS/MS	By MS/MS	By MS/MS	By MS/MS	By MS/MS	By MS/MS
A0A0R4J046;P53569;A0A3B2WCE8;P53569-2	A0A0R4J046;P53569;A0A3B2WCE8;P53569-2	18;18;9;9	18;18;9;9	18;18;9;9	CCAAT/enhancer-binding protein zeta	Cebpz	tr|A0A0R4J046|A0A0R4J046_MOUSE CCAAT/enhancer-binding protein zeta OS=Mus musculus OX=10090 GN=Cebpz PE=1 SV=1;sp|P53569|CEBPZ_MOUSE CCAAT/enhancer-binding protein zeta OS=Mus musculus OX=10090 GN=Cebpz PE=1 SV=2;tr|A0A3B2WCE8|A0A3B2WCE8_MOUSE CCAAT/enhanc	4	18	18	18	14	14	15	14	12	13	14	14	15	14	12	13	14	14	15	14	12	13	18.2	18.2	18.2	120.37	1052	1052;1052;461;461	3.76	37	26	16	16	44	0	75.375	By MS/MS	By MS/MS	By MS/MS	By MS/MS	By MS/MS	By MS/MS
A0A0R4J047;Q9CYI4;Q9CYI4-2;D3Z765;F6QU81	A0A0R4J047;Q9CYI4;Q9CYI4-2;D3Z765	13;13;10;9;1	13;13;10;9;1	8;8;6;5;1	Putative RNA-binding protein Luc7-like 1	Luc7l	tr|A0A0R4J047|A0A0R4J047_MOUSE Luc7 homolog (S. cerevisiae)-like, isoform CRA_c OS=Mus musculus OX=10090 GN=Luc7l PE=1 SV=1;sp|Q9CYI4|LUC7L_MOUSE Putative RNA-binding protein Luc7-like 1 OS=Mus musculus OX=10090 GN=Luc7l PE=1 SV=2;sp|Q9CYI4-2|LUC7L_MOUSE I	5	13	13	8	11	7	10	9	6	7	11	7	10	9	6	7	7	4	5	5	4	5	43.1	43.1	32.6	38.465	325	325;371;318;172;170	3.78	24	8	19	20	20	0	43.152	By MS/MS	By MS/MS	By MS/MS	By MS/MS	By MS/MS	By MS/MS
A0A0R4J049;Q8CIG8;A0A2I3BRG2;S4R295;F6QQQ6	A0A0R4J049;Q8CIG8	15;15;4;4;3	15;15;4;4;3	15;15;4;4;3	Protein arginine N-methyltransferase 5	Prmt5	tr|A0A0R4J049|A0A0R4J049_MOUSE Protein arginine N-methyltransferase 5 OS=Mus musculus OX=10090 GN=Prmt5 PE=1 SV=1;sp|Q8CIG8|ANM5_MOUSE Protein arginine N-methyltransferase 5 OS=Mus musculus OX=10090 GN=Prmt5 PE=1 SV=3	5	15	15	15	14	11	14	12	11	13	14	11	14	12	11	13	14	11	14	12	11	13	27.6	27.6	27.6	72.737	637	637;637;37;63;203	3.25	52	13	7	28	24	0	134.07	By MS/MS	By MS/MS	By MS/MS	By MS/MS	By MS/MS	By MS/MS
A0A1L1SS90;A0A0R4J050;Q99JW2;A0A1L1SRC1;A0A1L1SSU4;A0A087WPX1;A0A1L1SRW7;A0A087WRE0;A0A087WPV3;A0A1L1SRL5	A0A1L1SS90;A0A0R4J050;Q99JW2;A0A1L1SRC1;A0A1L1SSU4;A0A087WPX1;A0A1L1SRW7	7;7;7;6;5;5;4;2;1;1	7;7;7;6;5;5;4;2;1;1	7;7;7;6;5;5;4;2;1;1	Aminoacylase-1	Acy1	tr|A0A1L1SS90|A0A1L1SS90_MOUSE Aminoacylase-1 OS=Mus musculus OX=10090 GN=Acy1 PE=1 SV=1;tr|A0A0R4J050|A0A0R4J050_MOUSE Aminoacylase-1 OS=Mus musculus OX=10090 GN=Acy1 PE=1 SV=1;sp|Q99JW2|ACY1_MOUSE Aminoacylase-1 OS=Mus musculus OX=10090 GN=Acy1 PE=1 SV=1	10	7	7	7	6	6	6	7	4	7	6	6	6	7	4	7	6	6	6	7	4	7	23.9	23.9	23.9	42.067	373	373;408;408;343;201;219;336;50;39;155	3.63	12	10	9	15	6	0	125.32	By MS/MS	By MS/MS	By MS/MS	By MS/MS	By MS/MS	By MS/MS
E9PYA3;A0A0R4J052;G5E8T9;Q99KB8-2;Q99KB8;E9Q2H8;D3YWI0;D3YUX8	E9PYA3;A0A0R4J052;G5E8T9;Q99KB8-2;Q99KB8;E9Q2H8;D3YWI0	5;5;5;5;5;4;3;1	5;5;5;5;5;4;3;1	5;5;5;5;5;4;3;1	Hydroxyacylglutathione hydrolase, mitochondrial	Hagh	tr|E9PYA3|E9PYA3_MOUSE Hydroxyacylglutathione hydrolase, mitochondrial (Fragment) OS=Mus musculus OX=10090 GN=Hagh PE=1 SV=1;tr|A0A0R4J052|A0A0R4J052_MOUSE Hydroxyacylglutathione hydrolase, mitochondrial OS=Mus musculus OX=10090 GN=Hagh PE=1 SV=1;tr|G5E8T9	8	5	5	5	4	4	3	2	4	4	4	4	3	2	4	4	4	4	3	2	4	4	32.5	32.5	32.5	26	237	237;260;309;260;309;217;167;132	4.58	3		10	2	11	0	15.22	By MS/MS	By MS/MS	By MS/MS	By MS/MS	By MS/MS	By MS/MS
A0A1D5RMB5;A0A0R4J055;Q6TXD4;A0A1D5RLL6;A0A1D5RLY0;Q6TXD4-2	A0A1D5RMB5;A0A0R4J055;Q6TXD4;A0A1D5RLL6;A0A1D5RLY0;Q6TXD4-2	2;2;2;1;1;1	2;2;2;1;1;1	2;2;2;1;1;1	Dynamin-binding protein	Dnmbp	tr|A0A1D5RMB5|A0A1D5RMB5_MOUSE Dynamin-binding protein OS=Mus musculus OX=10090 GN=Dnmbp PE=1 SV=1;tr|A0A0R4J055|A0A0R4J055_MOUSE Dynamin-binding protein OS=Mus musculus OX=10090 GN=Dnmbp PE=1 SV=1;sp|Q6TXD4|DNMBP_MOUSE Dynamin-binding protein OS=Mus muscu	6	2	2	2	0	0	1	1	1	0	0	0	1	1	1	0	0	0	1	1	1	0	1.2	1.2	1.2	177.04	1576	1576;1580;1580;823;1264;823	5.67				1	2	0.00095767	3.3115			By MS/MS	By MS/MS	By MS/MS
A0A0R4J060;J3QNK5;Q8BIH0-2;Q8BIH0;Q8BIH0-3	A0A0R4J060;J3QNK5;Q8BIH0-2;Q8BIH0	5;5;5;5;2	5;5;5;5;2	5;5;5;5;2	Histone deacetylase complex subunit SAP130	Sap130	tr|A0A0R4J060|A0A0R4J060_MOUSE Histone deacetylase complex subunit SAP130 OS=Mus musculus OX=10090 GN=Sap130 PE=1 SV=1;tr|J3QNK5|J3QNK5_MOUSE Histone deacetylase complex subunit SAP130 OS=Mus musculus OX=10090 GN=Sap130 PE=1 SV=1;sp|Q8BIH0-2|SP130_MOUSE Is	5	5	5	5	4	4	3	3	2	2	4	4	3	3	2	2	4	4	3	3	2	2	5.2	5.2	5.2	111.16	1056	1056;1057;879;1057;348	5.09		4	1	7	11	0	10.196	By MS/MS	By MS/MS	By MS/MS	By MS/MS	By MS/MS	By matching
A0A0R4J065;Q8BGE6;A0A087WNY2;A0A087WRT0;A0A087WNR6;D3YZP6	A0A0R4J065;Q8BGE6;A0A087WNY2;A0A087WRT0	3;3;2;2;1;1	3;3;2;2;1;1	3;3;2;2;1;1	Cysteine protease ATG4B	Atg4b	tr|A0A0R4J065|A0A0R4J065_MOUSE Cysteine protease OS=Mus musculus OX=10090 GN=Atg4b PE=1 SV=1;sp|Q8BGE6|ATG4B_MOUSE Cysteine protease ATG4B OS=Mus musculus OX=10090 GN=Atg4b PE=1 SV=2;tr|A0A087WNY2|A0A087WNY2_MOUSE Cysteine protease (Fragment) OS=Mus muscul	6	3	3	3	2	1	2	1	2	1	2	1	2	1	2	1	2	1	2	1	2	1	10.4	10.4	10.4	44.403	393	393;393;121;143;63;150	2.83	1	11				0	5.5238	By MS/MS	By MS/MS	By MS/MS	By MS/MS	By MS/MS	By MS/MS
A0A0R4J069;Q9JLI6;Q9JLI6-2;M0QWF1;D3Z7G6;F7BB44;F7D651	A0A0R4J069;Q9JLI6;Q9JLI6-2;M0QWF1;D3Z7G6	4;4;3;2;2;1;1	4;4;3;2;2;1;1	4;4;3;2;2;1;1	Selenocysteine lyase	Scly	tr|A0A0R4J069|A0A0R4J069_MOUSE Selenocysteine lyase OS=Mus musculus OX=10090 GN=Scly PE=1 SV=1;sp|Q9JLI6|SCLY_MOUSE Selenocysteine lyase OS=Mus musculus OX=10090 GN=Scly PE=1 SV=1;sp|Q9JLI6-2|SCLY_MOUSE Isoform 2 of Selenocysteine lyase OS=Mus musculus OX=	7	4	4	4	2	2	4	4	3	2	2	2	4	4	3	2	2	2	4	4	3	2	8.3	8.3	8.3	47.203	432	432;432;283;61;245;216;218	4.12	6			15	3	0	8.1955	By MS/MS	By MS/MS	By MS/MS	By MS/MS	By MS/MS	By MS/MS
E9Q577;A0A0R4J073;Q5U5Q9;E9PWM5;A0A0R4J183;Q5U5Q9-2;Q5U5Q9-3	E9Q577;A0A0R4J073;Q5U5Q9;E9PWM5;A0A0R4J183;Q5U5Q9-2;Q5U5Q9-3	4;4;4;3;3;3;3	4;4;4;3;3;3;3	4;4;4;3;3;3;3	BRCA1-A complex subunit RAP80	Uimc1	tr|E9Q577|E9Q577_MOUSE BRCA1-A complex subunit RAP80 OS=Mus musculus OX=10090 GN=Uimc1 PE=1 SV=1;tr|A0A0R4J073|A0A0R4J073_MOUSE BRCA1-A complex subunit RAP80 OS=Mus musculus OX=10090 GN=Uimc1 PE=1 SV=1;sp|Q5U5Q9|UIMC1_MOUSE BRCA1-A complex subunit RAP80 OS	7	4	4	4	2	2	1	3	3	4	2	2	1	3	3	4	2	2	1	3	3	4	7.3	7.3	7.3	81.479	727	727;727;727;406;446;406;446	4.53		2	3	10		0	6.7596	By MS/MS	By MS/MS	By MS/MS	By MS/MS	By MS/MS	By MS/MS
A0A0R4J074;Q9EQQ0;Q8K085;F6WB49	A0A0R4J074;Q9EQQ0	3;3;1;1	3;3;1;1	3;3;1;1	Histone-lysine N-methyltransferase SUV39H2	Suv39h2	tr|A0A0R4J074|A0A0R4J074_MOUSE Histone-lysine N-methyltransferase OS=Mus musculus OX=10090 GN=Suv39h2 PE=1 SV=1;sp|Q9EQQ0|SUV92_MOUSE Histone-lysine N-methyltransferase SUV39H2 OS=Mus musculus OX=10090 GN=Suv39h2 PE=1 SV=1	4	3	3	3	2	2	1	2	2	3	2	2	1	2	2	3	2	2	1	2	2	3	8	8	8	54.095	477	477;477;257;375	4.28	5			6	7	0.00020683	4.5742	By MS/MS	By MS/MS	By MS/MS	By MS/MS	By MS/MS	By MS/MS
A0A0R4J078;A0A087WSK5	A0A0R4J078;A0A087WSK5	3;2	1;1	1;1		Ubxn4	tr|A0A0R4J078|A0A0R4J078_MOUSE UBX domain containing 2, isoform CRA_a OS=Mus musculus OX=10090 GN=Ubxn4 PE=1 SV=1;tr|A0A087WSK5|A0A087WSK5_MOUSE UBX domain-containing protein 4 (Fragment) OS=Mus musculus OX=10090 GN=Ubxn4 PE=1 SV=1	2	3	1	1	2	1	1	2	2	1	1	1	1	1	1	1	1	1	1	1	1	1	10.7	2.8	2.8	56.459	506	506;88	3		6				0.00077489	3.4663	By MS/MS	By MS/MS	By MS/MS	By MS/MS	By MS/MS	By MS/MS
A0A0R4J079;Q8BMP6	A0A0R4J079;Q8BMP6	6;6	6;6	6;6	Golgi resident protein GCP60	Acbd3	tr|A0A0R4J079|A0A0R4J079_MOUSE Acyl-Coenzyme A binding domain containing 3, isoform CRA_b OS=Mus musculus OX=10090 GN=Acbd3 PE=1 SV=1;sp|Q8BMP6|GCP60_MOUSE Golgi resident protein GCP60 OS=Mus musculus OX=10090 GN=Acbd3 PE=1 SV=3	2	6	6	6	6	6	6	6	6	5	6	6	6	6	6	5	6	6	6	6	6	5	16.2	16.2	16.2	60.181	525	525;525	2.65	23	36	4		6	0	47.74	By MS/MS	By MS/MS	By MS/MS	By MS/MS	By MS/MS	By MS/MS
A0A0R4J081;A2AQ17;Q9CWX2	A0A0R4J081;A2AQ17;Q9CWX2	1;1;1	1;1;1	1;1;1	Complex I intermediate-associated protein 30, mitochondrial	Ndufaf1	tr|A0A0R4J081|A0A0R4J081_MOUSE Complex I intermediate-associated protein 30, mitochondrial OS=Mus musculus OX=10090 GN=Ndufaf1 PE=1 SV=1;tr|A2AQ17|A2AQ17_MOUSE Complex I intermediate-associated protein 30, mitochondrial OS=Mus musculus OX=10090 GN=Ndufaf1	3	1	1	1	1	0	0	0	1	0	1	0	0	0	1	0	1	0	0	0	1	0	5.8	5.8	5.8	37.985	330	330;328;328	4.67			1	2		0	7.3273	By MS/MS				By matching
A0A0R4J083;P51174	A0A0R4J083;P51174	7;7	7;7	7;7	Long-chain specific acyl-CoA dehydrogenase, mitochondrial	Acadl	tr|A0A0R4J083|A0A0R4J083_MOUSE Long-chain-specific acyl-CoA dehydrogenase, mitochondrial OS=Mus musculus OX=10090 GN=Acadl PE=1 SV=1;sp|P51174|ACADL_MOUSE Long-chain specific acyl-CoA dehydrogenase, mitochondrial OS=Mus musculus OX=10090 GN=Acadl PE=1 SV=2	2	7	7	7	6	6	6	5	5	5	6	6	6	5	5	5	6	6	6	5	5	5	20.7	20.7	20.7	47.896	430	430;430	3.91	16		8	23	10	0	29.772	By MS/MS	By MS/MS	By MS/MS	By MS/MS	By MS/MS	By MS/MS
A0A0R4J085;Q3UHZ7;Q91YN5-3;Q91YN5;A0A0R4J1F6;Q91YN5-2	A0A0R4J085;Q3UHZ7;Q91YN5-3;Q91YN5;A0A0R4J1F6;Q91YN5-2	5;5;5;5;4;4	5;5;5;5;4;4	4;4;4;4;3;3	UDP-N-acetylhexosamine pyrophosphorylase;UDP-N-acetylgalactosamine pyrophosphorylase;UDP-N-acetylglucosamine pyrophosphorylase	Uap1	tr|A0A0R4J085|A0A0R4J085_MOUSE UDP-N-acetylhexosamine pyrophosphorylase OS=Mus musculus OX=10090 GN=Uap1 PE=1 SV=1;tr|Q3UHZ7|Q3UHZ7_MOUSE UDP-N-acetylhexosamine pyrophosphorylase OS=Mus musculus OX=10090 GN=Uap1 PE=1 SV=1;sp|Q91YN5-3|UAP1_MOUSE Isoform 3 o	6	5	5	4	4	3	3	4	4	3	4	3	3	4	4	3	4	2	2	3	3	2	12.5	12.5	10	58.495	521	521;522;521;522;505;505	4.75	5		1	3	15	0	24.52	By MS/MS	By MS/MS	By MS/MS	By MS/MS	By MS/MS	By MS/MS
P20352;A0A0R4J088;A0A0G2JGS5	P20352;A0A0R4J088	3;3;1	3;3;1	3;3;1	Tissue factor	F3	sp|P20352|TF_MOUSE Tissue factor OS=Mus musculus OX=10090 GN=F3 PE=1 SV=2;tr|A0A0R4J088|A0A0R4J088_MOUSE Tissue factor OS=Mus musculus OX=10090 GN=F3 PE=1 SV=1	3	3	3	3	3	1	2	3	2	1	3	1	2	3	2	1	3	1	2	3	2	1	11.6	11.6	11.6	32.935	294	294;294;157	3.33		10		2		0.0002076	4.6203	By MS/MS	By MS/MS	By MS/MS	By MS/MS	By MS/MS	By MS/MS
A0A0R4J091;Q9JKP7;D6RDT4	A0A0R4J091;Q9JKP7;D6RDT4	4;3;2	4;3;2	4;3;2	DNA polymerase epsilon subunit 3	Pole3	tr|A0A0R4J091|A0A0R4J091_MOUSE DNA polymerase epsilon subunit 3 OS=Mus musculus OX=10090 GN=Pole3 PE=1 SV=1;sp|Q9JKP7|DPOE3_MOUSE DNA polymerase epsilon subunit 3 OS=Mus musculus OX=10090 GN=Pole3 PE=1 SV=1;tr|D6RDT4|D6RDT4_MOUSE DNA polymerase epsilon sub	3	4	4	4	4	3	4	3	1	2	4	3	4	3	1	2	4	3	4	3	1	2	49	49	49	16.672	145	145;145;51	3.82		11	2		4	0	30.647	By MS/MS	By MS/MS	By MS/MS	By MS/MS	By MS/MS	By MS/MS
A0A0R4J094;Q3TC72	A0A0R4J094;Q3TC72	1;1	1;1	1;1	Fumarylacetoacetate hydrolase domain-containing protein 2A	Fahd2	tr|A0A0R4J094|A0A0R4J094_MOUSE Fumarylacetoacetate hydrolase domain-containing 2A OS=Mus musculus OX=10090 GN=Fahd2a PE=1 SV=1;sp|Q3TC72|FAHD2_MOUSE Fumarylacetoacetate hydrolase domain-containing protein 2A OS=Mus musculus OX=10090 GN=Fahd2 PE=1 SV=1	2	1	1	1	1	1	1	1	1	0	1	1	1	1	1	0	1	1	1	1	1	0	4.8	4.8	4.8	34.676	313	313;313	5				5		0.00060024	3.9695	By MS/MS	By MS/MS	By MS/MS	By MS/MS	By MS/MS
A0A0R4J098;O88291;D3YXQ7;O88291-2;D6RG92;O88291-3	A0A0R4J098;O88291;D3YXQ7;O88291-2	9;9;7;6;1;1	9;9;7;6;1;1	9;9;7;6;1;1	DBIRD complex subunit ZNF326	Znf326;Zfp326	tr|A0A0R4J098|A0A0R4J098_MOUSE Zinc finger protein 326 OS=Mus musculus OX=10090 GN=Zfp326 PE=1 SV=1;sp|O88291|ZN326_MOUSE DBIRD complex subunit ZNF326 OS=Mus musculus OX=10090 GN=Znf326 PE=1 SV=1;tr|D3YXQ7|D3YXQ7_MOUSE Zinc finger protein 326 (Fragment) OS	6	9	9	9	9	7	7	5	7	5	9	7	7	5	7	5	9	7	7	5	7	5	20.7	20.7	20.7	65.166	580	580;580;415;374;53;67	4.11	12	8	11	9	21	0	35.932	By MS/MS	By MS/MS	By MS/MS	By MS/MS	By MS/MS	By MS/MS
Q3UY34;A0A0R4J099;H3BLG8	Q3UY34;A0A0R4J099	5;5;1	5;5;1	5;5;1	Uncharacterized protein C12orf43 homolog		sp|Q3UY34|CSTOS_MOUSE Protein CUSTOS OS=Mus musculus OX=10090 GN=Custos PE=2 SV=1;tr|A0A0R4J099|A0A0R4J099_MOUSE RIKEN cDNA 2210016L21 gene OS=Mus musculus OX=10090 GN=2210016L21Rik PE=1 SV=1	3	5	5	5	3	2	2	3	2	1	3	2	2	3	2	1	3	2	2	3	2	1	37.9	37.9	37.9	27.631	256	256;256;74	3.85		7	1	5		0	25.034	By MS/MS	By MS/MS	By MS/MS	By MS/MS	By MS/MS	By MS/MS
Q05512-3;A0A0R4J227;F6ZS70;Q3T9A3;A0A0R4J0B1;E9QMP6;E9PYX3;E9Q9N6;Q05512-4;Q05512-2;Q05512;E9Q2J6;Q8CIP4-2;F7A3Q3;Q8CIP4;F6ZEX4;F6UY70	Q05512-3;A0A0R4J227;F6ZS70;Q3T9A3;A0A0R4J0B1;E9QMP6;E9PYX3;E9Q9N6;Q05512-4;Q05512-2;Q05512;E9Q2J6	7;7;7;7;7;7;7;7;7;7;7;4;2;2;2;1;1	4;4;4;4;4;4;4;4;4;4;4;1;0;2;0;1;1	4;4;4;4;4;4;4;4;4;4;4;1;0;2;0;1;1	Serine/threonine-protein kinase MARK2	Mark2	sp|Q05512-3|MARK2_MOUSE Isoform 3 of Serine/threonine-protein kinase MARK2 OS=Mus musculus OX=10090 GN=Mark2;tr|A0A0R4J227|A0A0R4J227_MOUSE Non-specific serine/threonine protein kinase OS=Mus musculus OX=10090 GN=Mark2 PE=1 SV=1;tr|F6ZS70|F6ZS70_MOUSE Non-	17	7	4	4	6	6	6	6	3	6	3	3	3	3	0	3	3	3	3	3	0	3	12.7	7.1	7.1	80.823	722	722;722;776;743;731;776;716;707;731;774;776;193;688;204;752;303;266	4.31		9			7	0	7.6645	By MS/MS	By MS/MS	By MS/MS	By MS/MS	By matching	By MS/MS
A0A0R4J0B3;Q6PB82;O70405	A0A0R4J0B3;Q6PB82;O70405	1;1;1	1;1;1	1;1;1	Serine/threonine-protein kinase ULK1	Ulk1	tr|A0A0R4J0B3|A0A0R4J0B3_MOUSE Serine/threonine-protein kinase OS=Mus musculus OX=10090 GN=Ulk1 PE=1 SV=1;tr|Q6PB82|Q6PB82_MOUSE Serine/threonine-protein kinase OS=Mus musculus OX=10090 GN=Ulk1 PE=1 SV=1;sp|O70405|ULK1_MOUSE Serine/threonine-protein kinase	3	1	1	1	0	1	1	1	1	0	0	1	1	1	1	0	0	1	1	1	1	0	1.1	1.1	1.1	112.45	1051	1051;1057;1051	4			4			0.00095749	3.3084		By MS/MS	By MS/MS	By matching	By MS/MS
A0A0R4J0B4;Q99KK2;Q99KK2-2	A0A0R4J0B4;Q99KK2;Q99KK2-2	7;7;6	7;7;6	7;7;6	N-acylneuraminate cytidylyltransferase	Cmas	tr|A0A0R4J0B4|A0A0R4J0B4_MOUSE Cytidine monophospho-N-acetylneuraminic acid synthetase OS=Mus musculus OX=10090 GN=Cmas PE=1 SV=1;sp|Q99KK2|NEUA_MOUSE N-acylneuraminate cytidylyltransferase OS=Mus musculus OX=10090 GN=Cmas PE=1 SV=2;sp|Q99KK2-2|NEUA_MOUSE	3	7	7	7	4	6	7	6	5	5	4	6	7	6	5	5	4	6	7	6	5	5	21.3	21.3	21.3	48.029	432	432;432;200	3.39	9	11	6	4	6	0	35.467	By MS/MS	By MS/MS	By MS/MS	By MS/MS	By MS/MS	By MS/MS
S4R2E1;A0A0R4J0B6;Q7TMS5;A0A0N4SWA2;D3Z150;D3YZX5;S4R2M4	S4R2E1;A0A0R4J0B6;Q7TMS5;A0A0N4SWA2;D3Z150	6;6;6;3;3;2;1	6;6;6;3;3;2;1	6;6;6;3;3;2;1	ATP-binding cassette sub-family G member 2	Abcg2	tr|S4R2E1|S4R2E1_MOUSE ATP-binding cassette sub-family G member 2 OS=Mus musculus OX=10090 GN=Abcg2 PE=1 SV=1;tr|A0A0R4J0B6|A0A0R4J0B6_MOUSE ATP-binding cassette sub-family G member 2 OS=Mus musculus OX=10090 GN=Abcg2 PE=1 SV=1;sp|Q7TMS5|ABCG2_MOUSE Broad	7	6	6	6	6	6	6	5	5	5	6	6	6	5	5	5	6	6	6	5	5	5	12.7	12.7	12.7	63.607	576	576;657;657;159;172;115;130	4.92	5	6			29	0	21.279	By MS/MS	By MS/MS	By MS/MS	By MS/MS	By MS/MS	By MS/MS
Q9D720;A0A0R4J0C0;F6VZ99	Q9D720;A0A0R4J0C0	3;3;1	3;3;1	3;3;1	Non-structural maintenance of chromosomes element 1 homolog	Nsmce1	sp|Q9D720|NSE1_MOUSE Non-structural maintenance of chromosomes element 1 homolog OS=Mus musculus OX=10090 GN=Nsmce1 PE=1 SV=1;tr|A0A0R4J0C0|A0A0R4J0C0_MOUSE Non-SMC element 1 homolog (S. cerevisiae), isoform CRA_b OS=Mus musculus OX=10090 GN=Nsmce1 PE=1 SV	3	3	3	3	2	1	2	2	1	2	2	1	2	2	1	2	2	1	2	2	1	2	12.4	12.4	12.4	30.708	266	266;280;200	5.91				1	10	0	7.4413	By MS/MS	By matching	By MS/MS	By MS/MS	By MS/MS	By MS/MS
A0A0R4J0C7;Q99PT3	A0A0R4J0C7;Q99PT3	2;2	2;2	2;2	INO80 complex subunit B	Ino80b	tr|A0A0R4J0C7|A0A0R4J0C7_MOUSE INO80 complex subunit B OS=Mus musculus OX=10090 GN=Ino80b PE=1 SV=1;sp|Q99PT3|IN80B_MOUSE INO80 complex subunit B OS=Mus musculus OX=10090 GN=Ino80b PE=1 SV=2	2	2	2	2	1	1	2	2	2	1	1	1	2	2	2	1	1	1	2	2	2	1	6.1	6.1	6.1	37.422	345	345;375	5				9		0.00096451	3.4073	By MS/MS	By MS/MS	By MS/MS	By MS/MS	By MS/MS	By MS/MS
A0A0R4J0C8;Q7TMF2	A0A0R4J0C8;Q7TMF2	5;5	5;5	5;5	3-5 exoribonuclease 1	Eri1	tr|A0A0R4J0C8|A0A0R4J0C8_MOUSE 3-5 exoribonuclease 1 OS=Mus musculus OX=10090 GN=Eri1 PE=1 SV=1;sp|Q7TMF2|ERI1_MOUSE 3-5 exoribonuclease 1 OS=Mus musculus OX=10090 GN=Eri1 PE=1 SV=2	2	5	5	5	5	4	4	4	4	4	5	4	4	4	4	4	5	4	4	4	4	4	15.9	15.9	15.9	39.551	345	345;345	3.57	9	2	12	10	2	0	26.251	By MS/MS	By MS/MS	By MS/MS	By MS/MS	By MS/MS	By MS/MS
A0A0R4J0D3;Q3TDQ1	A0A0R4J0D3;Q3TDQ1	1;1	1;1	1;1	Dolichyl-diphosphooligosaccharide--protein glycosyltransferase subunit STT3B	Stt3b	tr|A0A0R4J0D3|A0A0R4J0D3_MOUSE Dolichyl-diphosphooligosaccharide--protein glycosyltransferase subunit STT3B OS=Mus musculus OX=10090 GN=Stt3b PE=1 SV=1;sp|Q3TDQ1|STT3B_MOUSE Dolichyl-diphosphooligosaccharide--protein glycosyltransferase subunit STT3B OS=Mu	2	1	1	1	1	1	1	1	1	1	1	1	1	1	1	1	1	1	1	1	1	1	1.6	1.6	1.6	93.314	823	823;823	4.21	6			4	9	0	5.1617	By MS/MS	By MS/MS	By MS/MS	By MS/MS	By MS/MS	By MS/MS
A0A0R4J0E4;Q7TQK1;Q7TQK1-2	A0A0R4J0E4;Q7TQK1;Q7TQK1-2	7;6;4	7;6;4	7;6;4	Integrator complex subunit 7	Ints7	tr|A0A0R4J0E4|A0A0R4J0E4_MOUSE Integrator complex subunit 7 OS=Mus musculus OX=10090 GN=Ints7 PE=1 SV=1;sp|Q7TQK1|INT7_MOUSE Integrator complex subunit 7 OS=Mus musculus OX=10090 GN=Ints7 PE=1 SV=1;sp|Q7TQK1-2|INT7_MOUSE Isoform 2 of Integrator complex sub	3	7	7	7	7	4	4	6	5	4	7	4	4	6	5	4	7	4	4	6	5	4	10.7	10.7	10.7	106.87	966	966;966;498	3.77	6	3	24	9	1	0	59.769	By MS/MS	By MS/MS	By MS/MS	By MS/MS	By MS/MS	By MS/MS
A0A0R4J0F6;Q99KY4-2;Q99KY4;F6SLK1;D6RHK5;A0A0G2JFZ0;F7BG02	A0A0R4J0F6;Q99KY4-2;Q99KY4	16;16;16;6;1;1;1	16;16;16;6;1;1;1	15;15;15;5;1;1;1	Cyclin-G-associated kinase	Gak	tr|A0A0R4J0F6|A0A0R4J0F6_MOUSE Cyclin-G-associated kinase OS=Mus musculus OX=10090 GN=Gak PE=1 SV=1;sp|Q99KY4-2|GAK_MOUSE Isoform 2 of Cyclin-G-associated kinase OS=Mus musculus OX=10090 GN=Gak;sp|Q99KY4|GAK_MOUSE Cyclin-G-associated kinase OS=Mus musculus	7	16	16	15	12	10	12	12	12	10	12	10	12	12	12	10	11	10	12	11	12	10	15.4	15.4	14.6	143.67	1305	1305;1256;1305;608;128;129;187	4.33	14	9	19	12	34	0	49.753	By MS/MS	By MS/MS	By MS/MS	By MS/MS	By MS/MS	By MS/MS
A0A2I3BQL9;A0A0R4J0G0;Q8BH04;A0A2I3BS39;A0A2I3BRX1;A0A2I3BQC6	A0A2I3BQL9;A0A0R4J0G0;Q8BH04;A0A2I3BS39	9;9;9;6;4;2	9;9;9;6;4;2	9;9;9;6;4;2	Phosphoenolpyruvate carboxykinase [GTP], mitochondrial	Pck2	tr|A0A2I3BQL9|A0A2I3BQL9_MOUSE Phosphoenolpyruvate carboxykinase [GTP], mitochondrial (Fragment) OS=Mus musculus OX=10090 GN=Pck2 PE=1 SV=1;tr|A0A0R4J0G0|A0A0R4J0G0_MOUSE Phosphoenolpyruvate carboxykinase [GTP], mitochondrial OS=Mus musculus OX=10090 GN=Pc	6	9	9	9	6	8	6	5	7	5	6	8	6	5	7	5	6	8	6	5	7	5	18.9	18.9	18.9	65.936	599	599;667;640;609;489;160	3.66	22		17	8	18	0	36.334	By MS/MS	By MS/MS	By MS/MS	By MS/MS	By MS/MS	By MS/MS
A0A0R4J0G4;Q6VN19	A0A0R4J0G4;Q6VN19	3;3	2;2	2;2	Ran-binding protein 10	Ranbp10	tr|A0A0R4J0G4|A0A0R4J0G4_MOUSE Ran-binding protein 10 OS=Mus musculus OX=10090 GN=Ranbp10 PE=1 SV=1;sp|Q6VN19|RBP10_MOUSE Ran-binding protein 10 OS=Mus musculus OX=10090 GN=Ranbp10 PE=1 SV=2	2	3	2	2	3	3	3	3	1	3	2	2	2	2	1	2	2	2	2	2	1	2	6.9	4.3	4.3	70.087	648	648;620	4.07		9			5	0	6.187	By MS/MS	By MS/MS	By MS/MS	By MS/MS	By MS/MS	By matching
A0A2I3BPW9;A0A0R4J0G7;A0A2I3BQS1;E9QQ48	A0A2I3BPW9;A0A0R4J0G7;A0A2I3BQS1;E9QQ48	12;12;10;7	1;1;1;1	1;1;1;1		Dlgap5	tr|A0A2I3BPW9|A0A2I3BPW9_MOUSE Disks large-associated protein 5 OS=Mus musculus OX=10090 GN=Dlgap5 PE=1 SV=1;tr|A0A0R4J0G7|A0A0R4J0G7_MOUSE Disks large-associated protein 5 OS=Mus musculus OX=10090 GN=Dlgap5 PE=1 SV=1;tr|A0A2I3BQS1|A0A2I3BQS1_MOUSE Disks l	4	12	1	1	10	9	9	11	8	6	1	1	1	1	1	1	1	1	1	1	1	1	20.6	1.3	1.3	84.608	758	758;808;606;303	3		6				0.0025501	2.6757	By MS/MS	By MS/MS	By MS/MS	By MS/MS	By MS/MS	By matching
A0A0R4J0H7;Q8K2Z4;Q8K2Z4-2;A0A087WNQ1;A0A087WRK6	A0A0R4J0H7;Q8K2Z4;Q8K2Z4-2	28;27;27;4;3	28;27;27;4;3	28;27;27;4;3	Condensin complex subunit 1	Ncapd2	tr|A0A0R4J0H7|A0A0R4J0H7_MOUSE Condensin complex subunit 1 OS=Mus musculus OX=10090 GN=Ncapd2 PE=1 SV=1;sp|Q8K2Z4|CND1_MOUSE Condensin complex subunit 1 OS=Mus musculus OX=10090 GN=Ncapd2 PE=1 SV=2;sp|Q8K2Z4-2|CND1_MOUSE Isoform 2 of Condensin complex subu	5	28	28	28	26	24	25	23	21	22	26	24	25	23	21	22	26	24	25	23	21	22	24.9	24.9	24.9	155.59	1392	1392;1392;1404;162;94	3.66	78	36	60	33	71	0	220.18	By MS/MS	By MS/MS	By MS/MS	By MS/MS	By MS/MS	By MS/MS
A0A0R4J0H8;Q6NWW9	A0A0R4J0H8;Q6NWW9	4;4	4;4	4;4	Fibronectin type III domain-containing protein 3B	Fndc3b	tr|A0A0R4J0H8|A0A0R4J0H8_MOUSE Fibronectin type III domain-containing protein 3B OS=Mus musculus OX=10090 GN=Fndc3b PE=1 SV=1;sp|Q6NWW9|FND3B_MOUSE Fibronectin type III domain-containing protein 3B OS=Mus musculus OX=10090 GN=Fndc3b PE=1 SV=1	2	4	4	4	2	3	3	4	3	2	2	3	3	4	3	2	2	3	3	4	3	2	3.6	3.6	3.6	132.77	1207	1207;1207	4		6	6	4	1	0	11.548	By MS/MS	By MS/MS	By MS/MS	By MS/MS	By MS/MS	By MS/MS
A0A0R4J0I0;P70459	A0A0R4J0I0;P70459	1;1	1;1	1;1	ETS domain-containing transcription factor ERF	Erf	tr|A0A0R4J0I0|A0A0R4J0I0_MOUSE ETS domain-containing transcription factor ERF OS=Mus musculus OX=10090 GN=Erf PE=1 SV=1;sp|P70459|ERF_MOUSE ETS domain-containing transcription factor ERF OS=Mus musculus OX=10090 GN=Erf PE=1 SV=1	2	1	1	1	1	1	1	1	1	0	1	1	1	1	1	0	1	1	1	1	1	0	4.2	4.2	4.2	59.066	551	551;551	4			5			0	7.4831	By MS/MS	By MS/MS	By MS/MS	By MS/MS	By MS/MS
A0A0R4J0I4;E9PVJ3;Q8BIW9;F6YVH6	A0A0R4J0I4;E9PVJ3;Q8BIW9	4;4;4;1	4;4;4;1	4;4;4;1	Chromosome transmission fidelity protein 18 homolog	Chtf18	tr|A0A0R4J0I4|A0A0R4J0I4_MOUSE CTF18, chromosome transmission fidelity factor 18 homolog (S. cerevisiae), isoform CRA_a OS=Mus musculus OX=10090 GN=Chtf18 PE=1 SV=1;tr|E9PVJ3|E9PVJ3_MOUSE Chromosome transmission fidelity protein 18 homolog OS=Mus musculus	4	4	4	4	3	2	3	3	4	2	3	2	3	3	4	2	3	2	3	3	4	2	5.7	5.7	5.7	108.14	969	969;970;969;109	5.35		2		7	11	0	6.8305	By MS/MS	By MS/MS	By MS/MS	By MS/MS	By MS/MS	By MS/MS
Q91ZX7;A0A0R4J0I9;Q3U5J2	Q91ZX7;A0A0R4J0I9	5;5;2	5;5;2	5;5;2	Prolow-density lipoprotein receptor-related protein 1;Low-density lipoprotein receptor-related protein 1 85 kDa subunit;Low-density lipoprotein receptor-related protein 1 515 kDa subunit;Low-density lipoprotein receptor-related protein 1 intracellular domain	Lrp1	sp|Q91ZX7|LRP1_MOUSE Prolow-density lipoprotein receptor-related protein 1 OS=Mus musculus OX=10090 GN=Lrp1 PE=1 SV=1;tr|A0A0R4J0I9|A0A0R4J0I9_MOUSE Low density lipoprotein receptor-related protein 1 OS=Mus musculus OX=10090 GN=Lrp1 PE=1 SV=1	3	5	5	5	4	2	5	3	2	2	4	2	5	3	2	2	4	2	5	3	2	2	1.9	1.9	1.9	504.74	4545	4545;4545;743	4.48	5		5	3	12	0	11.434	By MS/MS	By MS/MS	By MS/MS	By MS/MS	By MS/MS	By MS/MS
A0A0R4J0J5;Q8K114;Q8K114-2	A0A0R4J0J5;Q8K114;Q8K114-2	8;8;7	8;8;7	8;8;7	Integrator complex subunit 9	Ints9	tr|A0A0R4J0J5|A0A0R4J0J5_MOUSE Integrator complex subunit 9 OS=Mus musculus OX=10090 GN=Ints9 PE=1 SV=1;sp|Q8K114|INT9_MOUSE Integrator complex subunit 9 OS=Mus musculus OX=10090 GN=Ints9 PE=1 SV=1;sp|Q8K114-2|INT9_MOUSE Isoform 2 of Integrator complex sub	3	8	8	8	7	6	6	6	6	5	7	6	6	6	6	5	7	6	6	6	6	5	13.4	13.4	13.4	77.426	687	687;658;576	4.45	12			8	24	0	18.95	By MS/MS	By MS/MS	By MS/MS	By MS/MS	By MS/MS	By MS/MS
A0A0R4J0J6;Q8BKT7;Q5SVF9;Q5SVF8	A0A0R4J0J6;Q8BKT7;Q5SVF9	8;7;5;1	8;7;5;1	8;7;5;1	THO complex subunit 5 homolog	Thoc5	tr|A0A0R4J0J6|A0A0R4J0J6_MOUSE THO complex subunit 5 homolog OS=Mus musculus OX=10090 GN=Thoc5 PE=1 SV=1;sp|Q8BKT7|THOC5_MOUSE THO complex subunit 5 homolog OS=Mus musculus OX=10090 GN=Thoc5 PE=1 SV=2;tr|Q5SVF9|Q5SVF9_MOUSE THO complex subunit 5 homolog OS	4	8	8	8	7	4	3	5	4	4	7	4	3	5	4	4	7	4	3	5	4	4	13.5	13.5	13.5	78.699	683	683;683;635;300	3.48	6	6	15		4	0	17.406	By MS/MS	By MS/MS	By MS/MS	By MS/MS	By MS/MS	By MS/MS
A0A0R4J0J8;Q2KN98	A0A0R4J0J8;Q2KN98	7;7	7;7	7;7	Cytospin-A	Specc1l	tr|A0A0R4J0J8|A0A0R4J0J8_MOUSE Cytospin-A OS=Mus musculus OX=10090 GN=Specc1l PE=1 SV=1;sp|Q2KN98|CYTSA_MOUSE Cytospin-A OS=Mus musculus OX=10090 GN=Specc1l PE=1 SV=1	2	7	7	7	6	5	5	5	4	4	6	5	5	5	4	4	6	5	5	5	4	4	9.2	9.2	9.2	126.55	1135	1135;1118	4.44		6	10	12	4	0	24.694	By MS/MS	By MS/MS	By MS/MS	By MS/MS	By MS/MS	By MS/MS
A0A0R4J0K1;Q9ERR7	A0A0R4J0K1;Q9ERR7	2;2	2;2	2;2	15 kDa selenoprotein	2020-09-15	tr|A0A0R4J0K1|A0A0R4J0K1_MOUSE Selenoprotein F OS=Mus musculus OX=10090 GN=Selenof PE=1 SV=1;sp|Q9ERR7|SEP15_MOUSE Selenoprotein F OS=Mus musculus OX=10090 GN=Selenof PE=1 SV=3	2	2	2	2	2	2	2	2	2	2	2	2	2	2	2	2	2	2	2	2	2	2	15.4	15.4	15.4	17.731	162	162;162	2.33	12			6		0	10.933	By MS/MS	By MS/MS	By MS/MS	By MS/MS	By MS/MS	By MS/MS
Z4YL78;A0A0R4J0K2;K3W4R5;A2AGT5-2;A2AGT5-3;A2AGT5	Z4YL78;A0A0R4J0K2;K3W4R5;A2AGT5-2;A2AGT5-3;A2AGT5	51;51;51;51;51;51	51;51;51;51;51;51	51;51;51;51;51;51	Cytoskeleton-associated protein 5	Ckap5	tr|Z4YL78|Z4YL78_MOUSE Cytoskeleton-associated protein 5 OS=Mus musculus OX=10090 GN=Ckap5 PE=1 SV=1;tr|A0A0R4J0K2|A0A0R4J0K2_MOUSE Cytoskeleton-associated protein 5 OS=Mus musculus OX=10090 GN=Ckap5 PE=1 SV=1;tr|K3W4R5|K3W4R5_MOUSE Cytoskeleton-associated	6	51	51	51	42	37	42	37	39	42	42	37	42	37	39	42	42	37	42	37	39	42	28.3	28.3	28.3	218.71	1972	1972;2011;2032;1972;2011;2032	3.68	125	54	91	59	115	0	264.2	By MS/MS	By MS/MS	By MS/MS	By MS/MS	By MS/MS	By MS/MS
Q8BRB0;A0A0R4J0L5;Q8R3I3;A0A0A6YWW6	Q8BRB0;A0A0R4J0L5;Q8R3I3	3;3;3;1	3;3;3;1	3;3;3;1	Conserved oligomeric Golgi complex subunit 6	Cog6	tr|Q8BRB0|Q8BRB0_MOUSE Conserved oligomeric Golgi complex subunit 6 OS=Mus musculus OX=10090 GN=Cog6 PE=1 SV=1;tr|A0A0R4J0L5|A0A0R4J0L5_MOUSE Conserved oligomeric Golgi complex subunit 6 OS=Mus musculus OX=10090 GN=Cog6 PE=1 SV=1;sp|Q8R3I3|COG6_MOUSE Conse	4	3	3	3	1	2	1	2	2	2	1	2	1	2	2	2	1	2	1	2	2	2	4.8	4.8	4.8	69.413	625	625;657;657;174	5.5				5	5	0.00021044	4.8506	By MS/MS	By MS/MS	By MS/MS	By MS/MS	By MS/MS	By MS/MS
Q8BJZ4;A0A0R4J0L6;A0A0N4SV23	Q8BJZ4;A0A0R4J0L6	8;8;3	8;8;3	8;8;3	28S ribosomal protein S35, mitochondrial	Mrps35	sp|Q8BJZ4|RT35_MOUSE 28S ribosomal protein S35, mitochondrial OS=Mus musculus OX=10090 GN=Mrps35 PE=1 SV=2;tr|A0A0R4J0L6|A0A0R4J0L6_MOUSE 28S ribosomal protein S35, mitochondrial OS=Mus musculus OX=10090 GN=Mrps35 PE=1 SV=1	3	8	8	8	6	6	6	5	5	5	6	6	6	5	5	5	6	6	6	5	5	5	37.5	37.5	37.5	35.975	320	320;320;85	3.41	27	12	10	21	12	0	54.003	By MS/MS	By MS/MS	By MS/MS	By MS/MS	By MS/MS	By MS/MS
A0A0R4J0M1;Q8VCN9	A0A0R4J0M1;Q8VCN9	7;6	7;6	7;6	Tubulin-specific chaperone C	Tbcc	tr|A0A0R4J0M1|A0A0R4J0M1_MOUSE Tubulin-specific Chaperone C OS=Mus musculus OX=10090 GN=Tbcc PE=1 SV=1;sp|Q8VCN9|TBCC_MOUSE Tubulin-specific chaperone C OS=Mus musculus OX=10090 GN=Tbcc PE=1 SV=1	2	7	7	7	6	7	7	7	5	5	6	7	7	7	5	5	6	7	7	7	5	5	32.8	32.8	32.8	38.094	341	341;341	3.04	11	24	1	4	5	0	91.328	By MS/MS	By MS/MS	By MS/MS	By MS/MS	By MS/MS	By MS/MS
Q9CPV1;A0A0R4J0M5;A0A494BA00	Q9CPV1;A0A0R4J0M5;A0A494BA00	3;3;2	3;3;2	3;3;2	Spindle and kinetochore-associated protein 1	Ska1	sp|Q9CPV1|SKA1_MOUSE Spindle and kinetochore-associated protein 1 OS=Mus musculus OX=10090 GN=Ska1 PE=2 SV=2;tr|A0A0R4J0M5|A0A0R4J0M5_MOUSE Spindle and kinetochore-associated protein 1 OS=Mus musculus OX=10090 GN=Ska1 PE=1 SV=1;tr|A0A494BA00|A0A494BA00_MOU	3	3	3	3	3	1	1	3	1	1	3	1	1	3	1	1	3	1	1	3	1	1	18.1	18.1	18.1	29.445	254	254;254;78	4.2	1	2		7		0	53.56	By MS/MS	By MS/MS	By MS/MS	By MS/MS	By MS/MS	By MS/MS
A0A0R4J0M9;Q8CDG3;Q8CDG3-2	A0A0R4J0M9;Q8CDG3;Q8CDG3-2	8;8;6	8;8;6	8;8;6	Deubiquitinating protein VCIP135	Vcpip1	tr|A0A0R4J0M9|A0A0R4J0M9_MOUSE Deubiquitinating protein VCIP135 OS=Mus musculus OX=10090 GN=Vcpip1 PE=1 SV=1;sp|Q8CDG3|VCIP1_MOUSE Deubiquitinating protein VCIP135 OS=Mus musculus OX=10090 GN=Vcpip1 PE=1 SV=1;sp|Q8CDG3-2|VCIP1_MOUSE Isoform 2 of Deubiquiti	3	8	8	8	5	6	7	6	6	5	5	6	7	6	6	5	5	6	7	6	6	5	8.2	8.2	8.2	134.44	1220	1220;1220;906	4.56	1	6	10	9	10	0	33.398	By MS/MS	By MS/MS	By MS/MS	By MS/MS	By MS/MS	By MS/MS
A0A0R4J0N5;P46718;A2T4N6	A0A0R4J0N5;P46718;A2T4N6	6;5;3	6;5;3	6;5;3	Programmed cell death protein 2	Pdcd2	tr|A0A0R4J0N5|A0A0R4J0N5_MOUSE Programmed cell death 2, isoform CRA_b OS=Mus musculus OX=10090 GN=Pdcd2 PE=1 SV=1;sp|P46718|PDCD2_MOUSE Programmed cell death protein 2 OS=Mus musculus OX=10090 GN=Pdcd2 PE=2 SV=2;tr|A2T4N6|A2T4N6_MOUSE Programmed cell death	3	6	6	6	5	3	3	4	3	3	5	3	3	4	3	3	5	3	3	4	3	3	24.8	24.8	24.8	38.325	343	343;343;258	3.63	14	3	5	13	8	0	16.408	By MS/MS	By MS/MS	By MS/MS	By MS/MS	By MS/MS	By MS/MS
Q9D7B6;A0A0R4J0P1;D3YTT4	Q9D7B6;A0A0R4J0P1;D3YTT4	9;9;8	9;9;8	9;9;8	Isobutyryl-CoA dehydrogenase, mitochondrial	Acad8	sp|Q9D7B6|ACAD8_MOUSE Isobutyryl-CoA dehydrogenase, mitochondrial OS=Mus musculus OX=10090 GN=Acad8 PE=1 SV=2;tr|A0A0R4J0P1|A0A0R4J0P1_MOUSE Acyl-Coenzyme A dehydrogenase family, member 8 OS=Mus musculus OX=10090 GN=Acad8 PE=1 SV=1;tr|D3YTT4|D3YTT4_MOUSE I	3	9	9	9	5	4	6	8	6	4	5	4	6	8	6	4	5	4	6	8	6	4	33.4	33.4	33.4	45.019	413	413;413;413	4.45	3		13	21	3	0	67.751	By MS/MS	By MS/MS	By MS/MS	By MS/MS	By MS/MS	By MS/MS
Q8VDG3;A0A0R4J0P6;A0A2R8VKA3	Q8VDG3;A0A0R4J0P6	13;13;4	13;13;4	13;13;4	Poly(A)-specific ribonuclease PARN	Parn	sp|Q8VDG3|PARN_MOUSE Poly(A)-specific ribonuclease PARN OS=Mus musculus OX=10090 GN=Parn PE=1 SV=1;tr|A0A0R4J0P6|A0A0R4J0P6_MOUSE Poly(A)-specific ribonuclease PARN OS=Mus musculus OX=10090 GN=Parn PE=1 SV=1	3	13	13	13	10	8	12	13	11	12	10	8	12	13	11	12	10	8	12	13	11	12	21.3	21.3	21.3	71.558	624	624;624;209	3.29	42	22	15	17	23	0	52.335	By MS/MS	By MS/MS	By MS/MS	By MS/MS	By MS/MS	By MS/MS
A0A0R4J0Q5;P21619;P21619-2	A0A0R4J0Q5;P21619;P21619-2	26;26;14	24;24;12	24;24;12	Lamin-B2	Lmnb2	tr|A0A0R4J0Q5|A0A0R4J0Q5_MOUSE Lamin-B2 OS=Mus musculus OX=10090 GN=Lmnb2 PE=1 SV=1;sp|P21619|LMNB2_MOUSE Lamin-B2 OS=Mus musculus OX=10090 GN=Lmnb2 PE=1 SV=2;sp|P21619-2|LMNB2_MOUSE Isoform B3 of Lamin-B2 OS=Mus musculus OX=10090 GN=Lmnb2	3	26	24	24	21	16	23	18	13	17	19	14	21	16	11	15	19	14	21	16	11	15	47	43.4	43.4	69.084	615	615;596;474	2.85	61	14	15	33	7	0	118.83	By MS/MS	By MS/MS	By MS/MS	By MS/MS	By MS/MS	By MS/MS
Q80VI1;A0A0R4J0Q6;D3YVX5	Q80VI1;A0A0R4J0Q6;D3YVX5	2;2;1	2;2;1	2;2;1	E3 ubiquitin-protein ligase TRIM56	Trim56	sp|Q80VI1|TRI56_MOUSE E3 ubiquitin-protein ligase TRIM56 OS=Mus musculus OX=10090 GN=Trim56 PE=1 SV=1;tr|A0A0R4J0Q6|A0A0R4J0Q6_MOUSE E3 ubiquitin-protein ligase TRIM56 OS=Mus musculus OX=10090 GN=Trim56 PE=1 SV=1;tr|D3YVX5|D3YVX5_MOUSE E3 ubiquitin-protein	3	2	2	2	1	0	2	2	1	1	1	0	2	2	1	1	1	0	2	2	1	1	4.5	4.5	4.5	79.512	734	734;734;212	6					10	0	5.3508	By MS/MS		By MS/MS	By MS/MS	By MS/MS	By matching
Q3UM29;A0A0R4J0Q9;Q3TR20	Q3UM29;A0A0R4J0Q9;Q3TR20	9;9;8	9;9;8	9;9;8	Conserved oligomeric Golgi complex subunit 7	Cog7	sp|Q3UM29|COG7_MOUSE Conserved oligomeric Golgi complex subunit 7 OS=Mus musculus OX=10090 GN=Cog7 PE=1 SV=1;tr|A0A0R4J0Q9|A0A0R4J0Q9_MOUSE Conserved oligomeric Golgi complex subunit 7 OS=Mus musculus OX=10090 GN=Cog7 PE=1 SV=1;tr|Q3TR20|Q3TR20_MOUSE Conse	3	9	9	9	7	6	8	6	6	6	7	6	8	6	6	6	7	6	8	6	6	6	13.4	13.4	13.4	86.072	770	770;770;721	4.38	7	6	8	4	20	0	60.765	By MS/MS	By MS/MS	By MS/MS	By MS/MS	By MS/MS	By MS/MS
O70404;A0A0R4J0R1;A0A0U1RPE8	O70404;A0A0R4J0R1	4;4;1	4;4;1	4;4;1	Vesicle-associated membrane protein 8	Vamp8	sp|O70404|VAMP8_MOUSE Vesicle-associated membrane protein 8 OS=Mus musculus OX=10090 GN=Vamp8 PE=1 SV=1;tr|A0A0R4J0R1|A0A0R4J0R1_MOUSE Vesicle-associated membrane protein 8 OS=Mus musculus OX=10090 GN=Vamp8 PE=1 SV=1	3	4	4	4	4	3	4	3	3	2	4	3	4	3	3	2	4	3	4	3	3	2	44.6	44.6	44.6	11.451	101	101;101;75	4.24			16	5		0	12.544	By MS/MS	By MS/MS	By MS/MS	By MS/MS	By MS/MS	By MS/MS
A0A0R4J0R3;Q3U1G5	A0A0R4J0R3;Q3U1G5	5;5	5;5	5;5	Interferon-stimulated 20 kDa exonuclease-like 2	Isg20l2	tr|A0A0R4J0R3|A0A0R4J0R3_MOUSE Interferon-stimulated 20 kDa exonuclease-like 2 OS=Mus musculus OX=10090 GN=Isg20l2 PE=1 SV=1;sp|Q3U1G5|I20L2_MOUSE Interferon-stimulated 20 kDa exonuclease-like 2 OS=Mus musculus OX=10090 GN=Isg20l2 PE=1 SV=2	2	5	5	5	5	4	4	5	4	3	5	4	4	5	4	3	5	4	4	5	4	3	17.9	17.9	17.9	40.991	368	368;368	3.06	16	2	6	5	6	0	36.483	By MS/MS	By MS/MS	By MS/MS	By MS/MS	By MS/MS	By MS/MS
A0A0R4J0S4;Q80Y17	A0A0R4J0S4;Q80Y17	3;3	3;3	3;3	Lethal(2) giant larvae protein homolog 1	Llgl1	tr|A0A0R4J0S4|A0A0R4J0S4_MOUSE Lethal(2) giant larvae protein homolog 1 OS=Mus musculus OX=10090 GN=Llgl1 PE=1 SV=1;sp|Q80Y17|L2GL1_MOUSE Lethal(2) giant larvae protein homolog 1 OS=Mus musculus OX=10090 GN=Llgl1 PE=1 SV=1	2	3	3	3	1	3	2	2	2	1	1	3	2	2	2	1	1	3	2	2	2	1	5.1	5.1	5.1	115.56	1062	1062;1036	3.62	2		10	1		0	26.643	By MS/MS	By MS/MS	By MS/MS	By MS/MS	By MS/MS	By matching
A0A1L1STY4;A0A1L1SVG0;A0A0R4J0S7;Q8CGB3;Q8CGB3-3;Q8CGB3-2	A0A1L1STY4;A0A1L1SVG0;A0A0R4J0S7;Q8CGB3;Q8CGB3-3;Q8CGB3-2	4;4;4;4;4;3	4;4;4;4;4;3	4;4;4;4;4;3	Uveal autoantigen with coiled-coil domains and ankyrin repeats	Uaca	tr|A0A1L1STY4|A0A1L1STY4_MOUSE Uveal autoantigen with coiled-coil domains and ankyrin repeats (Fragment) OS=Mus musculus OX=10090 GN=Uaca PE=1 SV=1;tr|A0A1L1SVG0|A0A1L1SVG0_MOUSE Uveal autoantigen with coiled-coil domains and ankyrin repeats OS=Mus musculu	6	4	4	4	2	3	2	3	1	2	2	3	2	3	1	2	2	3	2	3	1	2	4	4	4	140.51	1236	1236;1411;1413;1411;1413;1013	4.38		5	3		5	0	7.4786	By MS/MS	By MS/MS	By MS/MS	By MS/MS	By MS/MS	By matching
A0A0R4J0T0;Q8K3A0	A0A0R4J0T0;Q8K3A0	2;2	2;2	2;2	Iron-sulfur cluster co-chaperone protein HscB, mitochondrial	Hscb	tr|A0A0R4J0T0|A0A0R4J0T0_MOUSE Iron-sulfur cluster co-chaperone protein HscB OS=Mus musculus OX=10090 GN=Hscb PE=1 SV=1;sp|Q8K3A0|HSC20_MOUSE Iron-sulfur cluster co-chaperone protein HscB OS=Mus musculus OX=10090 GN=Hscb PE=1 SV=2	2	2	2	2	1	1	1	1	1	1	1	1	1	1	1	1	1	1	1	1	1	1	12.8	12.8	12.8	26.673	234	234;234	3		6				0	6.0181	By MS/MS	By MS/MS	By MS/MS	By MS/MS	By MS/MS	By matching
Q9D8S3;A0A0R4J0T8;A0A2I3BQY0	Q9D8S3;A0A0R4J0T8	3;3;1	3;3;1	3;3;1	ADP-ribosylation factor GTPase-activating protein 3	Arfgap3	sp|Q9D8S3|ARFG3_MOUSE ADP-ribosylation factor GTPase-activating protein 3 OS=Mus musculus OX=10090 GN=Arfgap3 PE=1 SV=2;tr|A0A0R4J0T8|A0A0R4J0T8_MOUSE ADP-ribosylation factor GTPase-activating protein 3 OS=Mus musculus OX=10090 GN=Arfgap3 PE=1 SV=1	3	3	3	3	3	3	3	1	2	3	3	3	3	1	2	3	3	3	3	1	2	3	7.1	7.1	7.1	57.455	523	523;524;105	4.6			6	9		0	9.6102	By MS/MS	By MS/MS	By MS/MS	By MS/MS	By MS/MS	By MS/MS
A0A0R4J0U2;Q0VGB7;A0A0N4SV05;A0A0N4SVH3	A0A0R4J0U2;Q0VGB7	11;11;5;4	11;11;5;4	11;11;5;4	Serine/threonine-protein phosphatase 4 regulatory subunit 2	Ppp4r2	tr|A0A0R4J0U2|A0A0R4J0U2_MOUSE Serine/threonine-protein phosphatase 4 regulatory subunit 2 OS=Mus musculus OX=10090 GN=Ppp4r2 PE=1 SV=1;sp|Q0VGB7|PP4R2_MOUSE Serine/threonine-protein phosphatase 4 regulatory subunit 2 OS=Mus musculus OX=10090 GN=Ppp4r2 PE=	4	11	11	11	11	8	9	10	9	9	11	8	9	10	9	9	11	8	9	10	9	9	48	48	48	46.448	417	417;417;229;300	3.16	37	26	28	13	13	0	188.61	By MS/MS	By MS/MS	By MS/MS	By MS/MS	By MS/MS	By MS/MS
A0A0R4J0U7;Q8R395	A0A0R4J0U7;Q8R395	2;2	2;2	2;2	COMM domain-containing protein 5	Commd5	tr|A0A0R4J0U7|A0A0R4J0U7_MOUSE COMM domain-containing protein 5 OS=Mus musculus OX=10090 GN=Commd5 PE=1 SV=1;sp|Q8R395|COMD5_MOUSE COMM domain-containing protein 5 OS=Mus musculus OX=10090 GN=Commd5 PE=1 SV=1	2	2	2	2	2	1	2	2	2	2	2	1	2	2	2	2	2	1	2	2	2	2	8.5	8.5	8.5	24.467	224	224;224	6					11	0.00020738	4.6074	By MS/MS	By MS/MS	By MS/MS	By MS/MS	By MS/MS	By MS/MS
A0A0R4J0U8;A2RSY6-2;A2RSY6;A2RSY6-3;A0A087WQ23;A2RSY6-4	A0A0R4J0U8;A2RSY6-2;A2RSY6	11;11;11;5;2;2	11;11;11;5;2;2	11;11;11;5;2;2	TRMT1-like protein	Trmt1l	tr|A0A0R4J0U8|A0A0R4J0U8_MOUSE RIKEN cDNA 1190005F20, isoform CRA_a OS=Mus musculus OX=10090 GN=Trmt1l PE=1 SV=1;sp|A2RSY6-2|TRM1L_MOUSE Isoform 2 of TRMT1-like protein OS=Mus musculus OX=10090 GN=Trmt1l;sp|A2RSY6|TRM1L_MOUSE TRMT1-like protein OS=Mus musc	6	11	11	11	8	7	9	8	8	8	8	7	9	8	8	8	8	7	9	8	8	8	26	26	26	80.919	728	728;671;728;285;158;151	3.18	14	23	17	10	1	0	105.23	By MS/MS	By MS/MS	By MS/MS	By MS/MS	By MS/MS	By MS/MS
E9Q361;A0A0R4J0V1;Q8K2A7;E9Q360	E9Q361;A0A0R4J0V1;Q8K2A7;E9Q360	4;4;4;3	4;4;4;3	4;4;4;3	Integrator complex subunit 10	Ints10	tr|E9Q361|E9Q361_MOUSE Integrator complex subunit 10 OS=Mus musculus OX=10090 GN=Ints10 PE=1 SV=1;tr|A0A0R4J0V1|A0A0R4J0V1_MOUSE Integrator complex subunit 10 OS=Mus musculus OX=10090 GN=Ints10 PE=1 SV=1;sp|Q8K2A7|INT10_MOUSE Integrator complex subunit 10	4	4	4	4	2	2	4	2	2	2	2	2	4	2	2	2	2	2	4	2	2	2	7	7	7	76.129	659	659;736;710;736	4.17	5	1	5	6	7	0	9.4176	By MS/MS	By MS/MS	By MS/MS	By MS/MS	By MS/MS	By MS/MS
A0A0R4J0V5;P08775	A0A0R4J0V5;P08775	34;34	34;34	34;34	DNA-directed RNA polymerase II subunit RPB1	Polr2a	tr|A0A0R4J0V5|A0A0R4J0V5_MOUSE DNA-directed RNA polymerase subunit OS=Mus musculus OX=10090 GN=Polr2a PE=1 SV=1;sp|P08775|RPB1_MOUSE DNA-directed RNA polymerase II subunit RPB1 OS=Mus musculus OX=10090 GN=Polr2a PE=1 SV=3	2	34	34	34	32	24	29	27	24	24	32	24	29	27	24	24	32	24	29	27	24	24	21.5	21.5	21.5	213.48	1932	1932;1970	3.57	44	63	72	21	36	0	149.3	By MS/MS	By MS/MS	By MS/MS	By MS/MS	By MS/MS	By MS/MS
A0A0R4J0W6;Q9CRC8;F6RDA7;D6RHB1;F6RGS7;D6RFC5;A0A0G2JGC9	A0A0R4J0W6;Q9CRC8	20;20;4;4;3;1;1	20;20;4;4;3;1;1	20;20;4;4;3;1;1	Leucine-rich repeat-containing protein 40	Lrrc40	tr|A0A0R4J0W6|A0A0R4J0W6_MOUSE Leucine rich repeat containing 40, isoform CRA_a OS=Mus musculus OX=10090 GN=Lrrc40 PE=1 SV=1;sp|Q9CRC8|LRC40_MOUSE Leucine-rich repeat-containing protein 40 OS=Mus musculus OX=10090 GN=Lrrc40 PE=1 SV=2	7	20	20	20	17	16	16	16	15	15	17	16	16	16	15	15	17	16	16	16	15	15	36.9	36.9	36.9	68.048	602	602;602;114;131;68;54;54	3.88	39	3	18	36	34	0	79.575	By MS/MS	By MS/MS	By MS/MS	By MS/MS	By MS/MS	By MS/MS
A0A0R4J0X2;Q8VC19;A0A1W2P873;D6RGR8	A0A0R4J0X2;Q8VC19;A0A1W2P873	3;3;2;1	3;3;2;1	3;3;2;1	5-aminolevulinate synthase, nonspecific, mitochondrial	Alas1	tr|A0A0R4J0X2|A0A0R4J0X2_MOUSE 5-aminolevulinate synthase OS=Mus musculus OX=10090 GN=Alas1 PE=1 SV=1;sp|Q8VC19|HEM1_MOUSE 5-aminolevulinate synthase, nonspecific, mitochondrial OS=Mus musculus OX=10090 GN=Alas1 PE=1 SV=2;tr|A0A1W2P873|A0A1W2P873_MOUSE 5-a	4	3	3	3	1	0	2	2	1	0	1	0	2	2	1	0	1	0	2	2	1	0	5.9	5.9	5.9	70.96	641	641;642;244;196	4.67			4		2	0.0023941	2.7872	By MS/MS		By MS/MS	By MS/MS	By matching
A0A0R4J0X8;Q9ES28-8;D3Z0V2;Q9ES28-4;Q9ES28-3;Q9ES28-2;Q9ES28-7;Q9ES28;Q9ES28-6;Q9ES28-5;A0A1B0GRS3;A2AFJ8	A0A0R4J0X8;Q9ES28-8;D3Z0V2;Q9ES28-4;Q9ES28-3;Q9ES28-2;Q9ES28-7;Q9ES28;Q9ES28-6;Q9ES28-5	7;7;6;6;6;6;6;6;4;4;3;2	7;7;6;6;6;6;6;6;4;4;3;2	5;5;4;4;4;4;4;4;3;3;3;0	Rho guanine nucleotide exchange factor 7	Arhgef7	tr|A0A0R4J0X8|A0A0R4J0X8_MOUSE Rho guanine nucleotide exchange factor (GEF7), isoform CRA_a OS=Mus musculus OX=10090 GN=Arhgef7 PE=1 SV=1;sp|Q9ES28-8|ARHG7_MOUSE Isoform H of Rho guanine nucleotide exchange factor 7 OS=Mus musculus OX=10090 GN=Arhgef7;tr|D	12	7	7	5	6	5	4	4	4	6	6	5	4	4	4	6	4	3	2	2	2	4	14.9	14.9	11.3	73.029	646	646;705;636;751;787;803;810;862;689;782;200;483	3.2	18	12		14	6	0	42.597	By MS/MS	By MS/MS	By MS/MS	By MS/MS	By MS/MS	By MS/MS
A0A0R4J0Z1;P08003	A0A0R4J0Z1;P08003	29;29	28;28	28;28	Protein disulfide-isomerase A4	Pdia4	tr|A0A0R4J0Z1|A0A0R4J0Z1_MOUSE Protein disulfide-isomerase A4 OS=Mus musculus OX=10090 GN=Pdia4 PE=1 SV=1;sp|P08003|PDIA4_MOUSE Protein disulfide-isomerase A4 OS=Mus musculus OX=10090 GN=Pdia4 PE=1 SV=3	2	29	28	28	27	24	27	26	24	22	26	24	26	25	24	21	26	24	26	25	24	21	49.5	47.1	47.1	72.369	641	641;638	3.37	138	62	75	70	72	0	323.31	By MS/MS	By MS/MS	By MS/MS	By MS/MS	By MS/MS	By MS/MS
E9PX84;Q3TRE6;E9QL31;A0A0R4J104;P98078-3;P98078-2;P98078;E0CZ53;Q9DCE6;E0CXT5;F6TQN9	E9PX84;Q3TRE6;E9QL31;A0A0R4J104;P98078-3;P98078-2;P98078;E0CZ53;Q9DCE6;E0CXT5;F6TQN9	2;2;2;2;2;2;2;1;1;1;1	2;2;2;2;2;2;2;1;1;1;1	2;2;2;2;2;2;2;1;1;1;1	Disabled homolog 2	Dab2	tr|E9PX84|E9PX84_MOUSE Disabled homolog 2 OS=Mus musculus OX=10090 GN=Dab2 PE=1 SV=1;tr|Q3TRE6|Q3TRE6_MOUSE Disabled homolog 2 OS=Mus musculus OX=10090 GN=Dab2 PE=1 SV=1;tr|E9QL31|E9QL31_MOUSE Disabled homolog 2 OS=Mus musculus OX=10090 GN=Dab2 PE=1 SV=1;t	11	2	2	2	1	1	1	1	1	2	1	1	1	1	1	2	1	1	1	1	1	2	5.7	5.7	5.7	56.503	527	527;548;745;766;548;745;766;110;235;236;634	3.57		3	4			0.00095111	3.2152	By MS/MS	By matching	By MS/MS	By MS/MS	By matching	By MS/MS
A0A0R4J107;Q8R146-2;Q8R146;A0A0A6YXV0	A0A0R4J107;Q8R146-2;Q8R146	8;8;8;2	8;8;8;2	8;8;8;2	Acylamino-acid-releasing enzyme	Apeh	tr|A0A0R4J107|A0A0R4J107_MOUSE Acylamino-acid-releasing enzyme (Fragment) OS=Mus musculus OX=10090 GN=Apeh PE=1 SV=1;sp|Q8R146-2|APEH_MOUSE Isoform 2 of Acylamino-acid-releasing enzyme OS=Mus musculus OX=10090 GN=Apeh;sp|Q8R146|APEH_MOUSE Acylamino-acid-re	4	8	8	8	7	6	7	7	7	6	7	6	7	7	7	6	7	6	7	7	7	6	15.4	15.4	15.4	79.704	716	716;717;732;204	3.81	25		16	12	24	0	37.55	By MS/MS	By MS/MS	By MS/MS	By MS/MS	By MS/MS	By MS/MS
A0A0R4J111;Q9JHC0	A0A0R4J111;Q9JHC0	1;1	1;1	1;1	Glutathione peroxidase 2	Gpx2	tr|A0A0R4J111|A0A0R4J111_MOUSE Glutathione peroxidase OS=Mus musculus OX=10090 GN=Gpx2 PE=1 SV=1;sp|Q9JHC0|GPX2_MOUSE Glutathione peroxidase 2 OS=Mus musculus OX=10090 GN=Gpx2 PE=2 SV=3	2	1	1	1	1	0	0	0	0	0	1	0	0	0	0	0	1	0	0	0	0	0	6.3	6.3	6.3	21.929	190	190;190	4			1			0.00058548	3.5685	By MS/MS
A0A0R4J114;Q8BTT6;A0A0A6YWS6;A0A0A6YXE1	A0A0R4J114;Q8BTT6;A0A0A6YWS6	8;8;7;1	8;8;7;1	8;8;7;1	Digestive organ expansion factor homolog	Diexf	tr|A0A0R4J114|A0A0R4J114_MOUSE Expressed sequence AA408296 OS=Mus musculus OX=10090 GN=Utp25 PE=1 SV=1;sp|Q8BTT6|DIEXF_MOUSE Digestive organ expansion factor homolog OS=Mus musculus OX=10090 GN=Diexf PE=2 SV=2;tr|A0A0A6YWS6|A0A0A6YWS6_MOUSE UTP25 small sub	4	8	8	8	7	2	8	5	3	4	7	2	8	5	3	4	7	2	8	5	3	4	12.1	12.1	12.1	88.3	768	768;772;640;52	4.33		10	5	10	5	0	16.785	By MS/MS	By MS/MS	By MS/MS	By MS/MS	By MS/MS	By MS/MS
A0A0R4J124;O54781;A0A0G2JDY2;Q6P5E1;A0A0G2JG74	A0A0R4J124;O54781	6;6;2;2;1	4;4;1;2;1	4;4;1;2;1	SRSF protein kinase 2;SRSF protein kinase 2 N-terminal;SRSF protein kinase 2 C-terminal	Srpk2	tr|A0A0R4J124|A0A0R4J124_MOUSE SRSF protein kinase 2 OS=Mus musculus OX=10090 GN=Srpk2 PE=1 SV=1;sp|O54781|SRPK2_MOUSE SRSF protein kinase 2 OS=Mus musculus OX=10090 GN=Srpk2 PE=1 SV=2	5	6	4	4	3	2	5	5	4	3	2	0	4	4	3	1	2	0	4	4	3	1	11.7	8.8	8.8	76.884	682	682;681;129;156;134	4		5	5	5		0	15.659	By MS/MS	By matching	By MS/MS	By MS/MS	By MS/MS	By matching
Z4YLI8;A0A0R4J140;Q5SW19-3;Q5SW19;Q5SW19-2	Z4YLI8;A0A0R4J140;Q5SW19-3;Q5SW19;Q5SW19-2	17;17;17;17;11	17;17;17;17;11	17;17;17;17;11	Clustered mitochondria protein homolog	Cluh	tr|Z4YLI8|Z4YLI8_MOUSE Clustered mitochondria protein homolog OS=Mus musculus OX=10090 GN=Cluh PE=1 SV=1;tr|A0A0R4J140|A0A0R4J140_MOUSE Clustered mitochondria protein homolog OS=Mus musculus OX=10090 GN=Cluh PE=1 SV=1;sp|Q5SW19-3|CLU_MOUSE Isoform 3 of Clu	5	17	17	17	15	10	11	12	9	13	15	10	11	12	9	13	15	10	11	12	9	13	20.1	20.1	20.1	146.02	1302	1302;1353;1264;1315;818	3.73	20	21	11	15	21	0	124.85	By MS/MS	By MS/MS	By MS/MS	By MS/MS	By MS/MS	By MS/MS
H3BK85;A0A0R4J141;Q8R023;H3BL61;H3BK63	H3BK85;A0A0R4J141;Q8R023;H3BL61;H3BK63	2;2;2;1;1	2;2;2;1;1	2;2;2;1;1	Polycomb group RING finger protein 1	Pcgf1	tr|H3BK85|H3BK85_MOUSE Polycomb group RING finger protein 1 OS=Mus musculus OX=10090 GN=Pcgf1 PE=1 SV=1;tr|A0A0R4J141|A0A0R4J141_MOUSE Polycomb group RING finger protein 1 OS=Mus musculus OX=10090 GN=Pcgf1 PE=1 SV=1;sp|Q8R023|PCGF1_MOUSE Polycomb group RIN	5	2	2	2	1	0	1	1	1	0	1	0	1	1	1	0	1	0	1	1	1	0	12.5	12.5	12.5	20.876	176	176;247;259;106;108	4.5		2			2	0.00095057	3.1971	By matching		By MS/MS	By MS/MS	By MS/MS
A0A0R4J1I5;D3Z726;A0A0R4J161;Q9DBY0-2;Q9DBY0-3;Q9DBY0	A0A0R4J1I5;D3Z726;A0A0R4J161;Q9DBY0-2;Q9DBY0-3;Q9DBY0	2;2;2;2;2;2	2;2;2;2;2;2	2;2;2;2;2;2	Forkhead box protein P4	Foxp4	tr|A0A0R4J1I5|A0A0R4J1I5_MOUSE Forkhead box protein P4 OS=Mus musculus OX=10090 GN=Foxp4 PE=1 SV=1;tr|D3Z726|D3Z726_MOUSE Forkhead box protein P4 OS=Mus musculus OX=10090 GN=Foxp4 PE=1 SV=1;tr|A0A0R4J161|A0A0R4J161_MOUSE Forkhead box protein P4 OS=Mus musc	6	2	2	2	1	1	1	0	1	1	1	1	1	0	1	1	1	1	1	0	1	1	5.1	5.1	5.1	72.829	673	673;683;685;672;684;795	6					5	0	5.6794	By MS/MS	By MS/MS	By MS/MS		By MS/MS	By MS/MS
A0A0R4J170;Q3TKT4;Q3TKT4-2;G3UX35;E9QAB8;F2Z4A9;H3BLH0;Q6DIC0;H3BJK2;H3BKN5;A0A140LJD7;A0A140LID0	A0A0R4J170;Q3TKT4;Q3TKT4-2;G3UX35	29;29;29;25;7;7;7;7;5;3;2;2	29;29;29;25;7;7;7;7;5;3;2;2	28;28;28;24;6;6;6;6;4;3;1;2	Transcription activator BRG1	Smarca4	tr|A0A0R4J170|A0A0R4J170_MOUSE Transcription activator BRG1 OS=Mus musculus OX=10090 GN=Smarca4 PE=1 SV=1;sp|Q3TKT4|SMCA4_MOUSE Transcription activator BRG1 OS=Mus musculus OX=10090 GN=Smarca4 PE=1 SV=1;sp|Q3TKT4-2|SMCA4_MOUSE Isoform 2 of Transcription ac	12	29	29	28	24	21	25	22	20	19	24	21	25	22	20	19	24	20	24	22	20	18	20.2	20.2	19.7	181.85	1617	1617;1613;1614;1267;1510;1583;1601;1577;1525;299;228;267	2.97	76	65	44	35	10	0	207.57	By MS/MS	By MS/MS	By MS/MS	By MS/MS	By MS/MS	By MS/MS
Q9QZH6;A0A0R4J174;J3KMM6	Q9QZH6;A0A0R4J174;J3KMM6	5;5;4	5;5;4	5;5;4	Evolutionarily conserved signaling intermediate in Toll pathway, mitochondrial	Ecsit	sp|Q9QZH6|ECSIT_MOUSE Evolutionarily conserved signaling intermediate in Toll pathway, mitochondrial OS=Mus musculus OX=10090 GN=Ecsit PE=1 SV=2;tr|A0A0R4J174|A0A0R4J174_MOUSE Evolutionarily conserved-signaling intermediate in Toll pathway, mitochondrial O	3	5	5	5	2	2	2	2	1	2	2	2	2	2	1	2	2	2	2	2	1	2	19.8	19.8	19.8	49.798	435	435;435;223	3	4	2	6	1		0	9.3979	By MS/MS	By MS/MS	By MS/MS	By MS/MS	By matching	By MS/MS
Q3UQU0;A0A0R4J175;A0A1Y7VJ63	Q3UQU0;A0A0R4J175;A0A1Y7VJ63	2;2;1	2;2;1	2;2;1	Bromodomain-containing protein 9	Brd9	sp|Q3UQU0|BRD9_MOUSE Bromodomain-containing protein 9 OS=Mus musculus OX=10090 GN=Brd9 PE=1 SV=1;tr|A0A0R4J175|A0A0R4J175_MOUSE Bromodomain-containing protein 9 OS=Mus musculus OX=10090 GN=Brd9 PE=1 SV=1;tr|A0A1Y7VJ63|A0A1Y7VJ63_MOUSE Bromodomain-containin	3	2	2	2	2	1	1	2	1	1	2	1	1	2	1	1	2	1	1	2	1	1	5.2	5.2	5.2	66.839	596	596;597;370	3.5		6		2		0	6.4484	By MS/MS	By MS/MS	By MS/MS	By MS/MS	By MS/MS	By MS/MS
A0A0R4J187;P23475;A0A2R8VHZ9;E9Q163	A0A0R4J187;P23475;A0A2R8VHZ9	10;10;6;2	10;10;6;2	10;10;6;2	X-ray repair cross-complementing protein 6	Xrcc6	tr|A0A0R4J187|A0A0R4J187_MOUSE X-ray repair cross-complementing protein 6 OS=Mus musculus OX=10090 GN=Xrcc6 PE=1 SV=1;sp|P23475|XRCC6_MOUSE X-ray repair cross-complementing protein 6 OS=Mus musculus OX=10090 GN=Xrcc6 PE=1 SV=5;tr|A0A2R8VHZ9|A0A2R8VHZ9_MOUS	4	10	10	10	10	6	10	7	7	9	10	6	10	7	7	9	10	6	10	7	7	9	19.9	19.9	19.9	69.484	608	608;608;263;106	2.8	36	22	9	11	8	0	57.063	By MS/MS	By MS/MS	By MS/MS	By MS/MS	By MS/MS	By MS/MS
A0A0R4J195;Q9CSU0-2;Q9CSU0;F6YB25;Q9CSU0-3;F7DAY5	A0A0R4J195;Q9CSU0-2;Q9CSU0;F6YB25;Q9CSU0-3;F7DAY5	8;8;8;7;6;5	8;8;8;7;6;5	8;8;8;7;6;5	Regulation of nuclear pre-mRNA domain-containing protein 1B	Rprd1b	tr|A0A0R4J195|A0A0R4J195_MOUSE Regulation of nuclear pre-mRNA domain-containing protein 1B OS=Mus musculus OX=10090 GN=Rprd1b PE=1 SV=1;sp|Q9CSU0-2|RPR1B_MOUSE Isoform 2 of Regulation of nuclear pre-mRNA domain-containing protein 1B OS=Mus musculus OX=1009	6	8	8	8	6	4	6	7	6	6	6	4	6	7	6	6	6	4	6	7	6	6	27.4	27.4	27.4	36.812	325	325;294;326;194;224;143	3.51	21	5	26	15	8	0	51.81	By MS/MS	By MS/MS	By MS/MS	By MS/MS	By MS/MS	By MS/MS
Q62431;A0A0R4J1A7;D3YVQ2	Q62431;A0A0R4J1A7	4;4;1	4;4;1	4;4;1	AT-rich interactive domain-containing protein 3A	Arid3a	sp|Q62431|ARI3A_MOUSE AT-rich interactive domain-containing protein 3A OS=Mus musculus OX=10090 GN=Arid3a PE=1 SV=1;tr|A0A0R4J1A7|A0A0R4J1A7_MOUSE AT-rich interactive domain-containing protein 3A OS=Mus musculus OX=10090 GN=Arid3a PE=1 SV=1	3	4	4	4	2	3	3	3	2	4	2	3	3	3	2	4	2	3	3	3	2	4	9.5	9.5	9.5	64.172	601	601;599;108	5.23	1		2	11	12	0	20.458	By MS/MS	By MS/MS	By MS/MS	By MS/MS	By MS/MS	By MS/MS
A0A0R4J1B9;G3X9M0;Q9ER88-2;Q9ER88;G3UWZ6;G3UWM7;G3UYM6;G3UWR5;G3UWJ4;G3UZC0	A0A0R4J1B9;G3X9M0;Q9ER88-2;Q9ER88;G3UWZ6	5;5;5;5;3;2;1;1;1;1	5;5;5;5;3;2;1;1;1;1	5;5;5;5;3;2;1;1;1;1	28S ribosomal protein S29, mitochondrial	Dap3	tr|A0A0R4J1B9|A0A0R4J1B9_MOUSE 28S ribosomal protein S29, mitochondrial OS=Mus musculus OX=10090 GN=Dap3 PE=1 SV=1;tr|G3X9M0|G3X9M0_MOUSE 28S ribosomal protein S29, mitochondrial OS=Mus musculus OX=10090 GN=Dap3 PE=1 SV=1;sp|Q9ER88-2|RT29_MOUSE Isoform 2 o	10	5	5	5	5	4	4	5	5	5	5	4	4	5	5	5	5	4	4	5	5	5	14.2	14.2	14.2	42.123	366	366;396;361;391;255;217;133;165;200;212	3.55	18	6	14	11	11	0	26.253	By MS/MS	By MS/MS	By MS/MS	By MS/MS	By MS/MS	By MS/MS
A0A0R4J1C5;Q91YY4	A0A0R4J1C5;Q91YY4	1;1	1;1	1;1	ATP synthase mitochondrial F1 complex assembly factor 2	Atpaf2	tr|A0A0R4J1C5|A0A0R4J1C5_MOUSE ATP synthase mitochondrial F1 complex assembly factor 2 OS=Mus musculus OX=10090 GN=Atpaf2 PE=1 SV=1;sp|Q91YY4|ATPF2_MOUSE ATP synthase mitochondrial F1 complex assembly factor 2 OS=Mus musculus OX=10090 GN=Atpaf2 PE=1 SV=1	2	1	1	1	0	0	1	0	0	1	0	0	1	0	0	1	0	0	1	0	0	1	7.4	7.4	7.4	34.287	298	298;289	5				2		0.0023844	2.7479			By MS/MS			By matching
A0A0R4J1E8;Q6P8M1-2;Q6P8M1;A0A2I3BQ56;A0A571BEN9;A0A2I3BPH0	A0A0R4J1E8;Q6P8M1-2;Q6P8M1	5;5;5;2;2;1	5;5;5;2;2;1	5;5;5;2;2;1	Putative deoxyribonuclease TATDN1	Tatdn1	tr|A0A0R4J1E8|A0A0R4J1E8_MOUSE Putative deoxyribonuclease TATDN1 OS=Mus musculus OX=10090 GN=Tatdn1 PE=1 SV=1;sp|Q6P8M1-2|TATD1_MOUSE Isoform 2 of Putative deoxyribonuclease TATDN1 OS=Mus musculus OX=10090 GN=Tatdn1;sp|Q6P8M1|TATD1_MOUSE Putative deoxyribo	6	5	5	5	5	3	4	4	3	1	5	3	4	4	3	1	5	3	4	4	3	1	24.2	24.2	24.2	29.802	264	264;294;295;78;122;71	4.25	5		3	11	5	0	13.115	By MS/MS	By MS/MS	By MS/MS	By MS/MS	By MS/MS	By MS/MS
A0A0R4J1F8;A0A2K6EDP7;P59328-3;P59328;P59328-2	A0A0R4J1F8;A0A2K6EDP7;P59328-3;P59328	21;21;20;20;9	21;21;20;20;9	21;21;20;20;9	WD repeat and HMG-box DNA-binding protein 1	Wdhd1	tr|A0A0R4J1F8|A0A0R4J1F8_MOUSE WD repeat and HMG-box DNA-binding protein 1 OS=Mus musculus OX=10090 GN=Wdhd1 PE=1 SV=1;tr|A0A2K6EDP7|A0A2K6EDP7_MOUSE WD repeat and HMG-box DNA-binding protein 1 OS=Mus musculus OX=10090 GN=Wdhd1 PE=1 SV=1;sp|P59328-3|WDHD1_	5	21	21	21	18	15	16	15	14	12	18	15	16	15	14	12	18	15	16	15	14	12	25.8	25.8	25.8	120.34	1081	1081;1118;1080;1117;641	3.23	42	14	38	16	14	0	323.31	By MS/MS	By MS/MS	By MS/MS	By MS/MS	By MS/MS	By MS/MS
D3YTP0;A0A0R4J1G9;E9QN92;Q8CI59;Q8CI59-2	D3YTP0;A0A0R4J1G9;E9QN92;Q8CI59;Q8CI59-2	2;2;2;2;2	2;2;2;2;2	2;2;2;2;2	Metalloreductase STEAP3	Steap3	tr|D3YTP0|D3YTP0_MOUSE Metalloreductase STEAP3 (Fragment) OS=Mus musculus OX=10090 GN=Steap3 PE=1 SV=8;tr|A0A0R4J1G9|A0A0R4J1G9_MOUSE Metalloreductase STEAP3 OS=Mus musculus OX=10090 GN=Steap3 PE=1 SV=1;tr|E9QN92|E9QN92_MOUSE Metalloreductase STEAP3 OS=Mus	5	2	2	2	2	1	1	1	1	1	2	1	1	1	1	1	2	1	1	1	1	1	6	6	6	46.878	418	418;488;526;488;526	5.86				1	6	0.002384	2.7456	By MS/MS	By MS/MS	By MS/MS	By MS/MS	By MS/MS	By MS/MS
A0A0R4J1H0;Q3KNM2	A0A0R4J1H0;Q3KNM2	2;2	2;2	2;2	E3 ubiquitin-protein ligase MARCH5	2020-03-05	tr|A0A0R4J1H0|A0A0R4J1H0_MOUSE E3 ubiquitin-protein ligase MARCH5 OS=Mus musculus OX=10090 GN=March5 PE=1 SV=1;sp|Q3KNM2|MARH5_MOUSE E3 ubiquitin-protein ligase MARCH5 OS=Mus musculus OX=10090 GN=March5 PE=1 SV=1	2	2	2	2	2	2	2	2	2	2	2	2	2	2	2	2	2	2	2	2	2	2	11.1	11.1	11.1	27.363	244	244;278	3.29	6		12	3		0	38.274	By MS/MS	By MS/MS	By MS/MS	By MS/MS	By MS/MS	By MS/MS
A0A0R4J1H6;E9QP99;P55937-1;P55937	A0A0R4J1H6;E9QP99;P55937-1;P55937	16;16;16;16	16;16;16;16	16;16;16;16	Golgin subfamily A member 3	Golga3	tr|A0A0R4J1H6|A0A0R4J1H6_MOUSE Golgin subfamily A member 3 OS=Mus musculus OX=10090 GN=Golga3 PE=1 SV=1;tr|E9QP99|E9QP99_MOUSE Golgin subfamily A member 3 OS=Mus musculus OX=10090 GN=Golga3 PE=1 SV=1;sp|P55937-1|GOGA3_MOUSE Isoform 1 of Golgin subfamily A	4	16	16	16	11	9	9	10	8	9	11	9	9	10	8	9	11	9	9	10	8	9	14.2	14.2	14.2	162.89	1447	1447;1487;1447;1487	4.2	1	16	13	29	1	0	136.2	By MS/MS	By MS/MS	By MS/MS	By MS/MS	By MS/MS	By MS/MS
A0A0R4J1H8;A0A286YDQ8;E9QMY5;Q9QXN0-4;Q9QXN0-2;Q9QXN0-3;Q9QXN0;E9Q6I3	A0A0R4J1H8;A0A286YDQ8;E9QMY5;Q9QXN0-4;Q9QXN0-2;Q9QXN0-3;Q9QXN0;E9Q6I3	5;5;5;5;5;5;5;3	4;4;4;4;4;4;4;2	4;4;4;4;4;4;4;2	Protein Shroom3	Shroom3	tr|A0A0R4J1H8|A0A0R4J1H8_MOUSE Protein Shroom3 OS=Mus musculus OX=10090 GN=Shroom3 PE=1 SV=1;tr|A0A286YDQ8|A0A286YDQ8_MOUSE Protein Shroom3 OS=Mus musculus OX=10090 GN=Shroom3 PE=1 SV=1;tr|E9QMY5|E9QMY5_MOUSE Protein Shroom3 OS=Mus musculus OX=10090 GN=Shr	8	5	4	4	3	1	1	2	2	2	2	0	0	1	1	2	2	0	0	1	1	2	3.5	3	3	195.43	1805	1805;1899;1980;1805;1811;1980;1986;1849	4			6			0	9.9547	By MS/MS	By matching	By matching	By MS/MS	By matching	By MS/MS
A0A0R4J1H9;H3BJ24;D3Z6Q3;P58462-4;P58462;D3Z6Q4;H3BJM1;H3BL33;A0A0R4J282;H3BJR8;P58462-5;H3BLF2;E2S038;P58462-2;P58462-3;D3Z0J5;D3Z2T4;D3Z454;H3BJ68;H3BKT4	A0A0R4J1H9;H3BJ24;D3Z6Q3;P58462-4;P58462;D3Z6Q4;H3BJM1;H3BL33;A0A0R4J282;H3BJR8;P58462-5;H3BLF2;E2S038;P58462-2;P58462-3;D3Z0J5	5;5;5;5;5;5;5;5;5;4;4;4;4;4;4;3;2;1;1;1	5;5;5;5;5;5;5;5;5;4;4;4;4;4;4;3;2;1;1;1	5;5;5;5;5;5;5;5;5;4;4;4;4;4;4;3;2;1;1;1	Forkhead box protein P1	Foxp1	tr|A0A0R4J1H9|A0A0R4J1H9_MOUSE Forkhead box protein P1 OS=Mus musculus OX=10090 GN=Foxp1 PE=1 SV=1;tr|H3BJ24|H3BJ24_MOUSE Forkhead box protein P1 OS=Mus musculus OX=10090 GN=Foxp1 PE=1 SV=1;tr|D3Z6Q3|D3Z6Q3_MOUSE Forkhead box protein P1 OS=Mus musculus OX=	20	5	5	5	4	3	5	3	3	4	4	3	5	3	3	4	4	3	5	3	3	4	13.8	13.8	13.8	74.907	673	673;577;706;575;705;706;675;674;576;564;721;706;705;641;455;348;188;124;107;111	3.61	6		19	6		0	27.02	By MS/MS	By MS/MS	By MS/MS	By MS/MS	By MS/MS	By MS/MS
D3YZC2;F8WHD9;A0A0R4J1I3;O88559-2;O88559;F7CJP6	D3YZC2;F8WHD9;A0A0R4J1I3;O88559-2;O88559;F7CJP6	3;3;3;3;3;2	3;3;3;3;3;2	3;3;3;3;3;2	Menin	Men1	tr|D3YZC2|D3YZC2_MOUSE Menin OS=Mus musculus OX=10090 GN=Men1 PE=1 SV=1;tr|F8WHD9|F8WHD9_MOUSE Menin OS=Mus musculus OX=10090 GN=Men1 PE=1 SV=1;tr|A0A0R4J1I3|A0A0R4J1I3_MOUSE Menin OS=Mus musculus OX=10090 GN=Men1 PE=1 SV=1;sp|O88559-2|MEN1_MOUSE Isoform 2	6	3	3	3	2	1	1	1	0	2	2	1	1	1	0	2	2	1	1	1	0	2	6.2	6.2	6.2	63.751	576	576;616;617;556;611;108	4.29			6		1	0.00040917	4.4048	By MS/MS	By MS/MS	By MS/MS	By MS/MS		By MS/MS
Q9QY81;A0A0R4J1I6;F6XGN0	Q9QY81;A0A0R4J1I6	9;9;4	9;9;4	9;9;4	Nuclear pore membrane glycoprotein 210	Nup210	sp|Q9QY81|PO210_MOUSE Nuclear pore membrane glycoprotein 210 OS=Mus musculus OX=10090 GN=Nup210 PE=1 SV=2;tr|A0A0R4J1I6|A0A0R4J1I6_MOUSE Nuclear pore membrane glycoprotein 210 OS=Mus musculus OX=10090 GN=Nup210 PE=1 SV=1	3	9	9	9	8	4	5	4	4	5	8	4	5	4	4	5	8	4	5	4	4	5	6.2	6.2	6.2	204.1	1886	1886;1842;1076	4.47		8	4	17	3	0	28.539	By MS/MS	By MS/MS	By MS/MS	By MS/MS	By MS/MS	By MS/MS
A0A0R4J1J1;Q69ZP3-2;Q69ZP3;Q69ZP3-3	A0A0R4J1J1;Q69ZP3-2;Q69ZP3;Q69ZP3-3	1;1;1;1	1;1;1;1	1;1;1;1	Probable hydrolase PNKD	Pnkd	tr|A0A0R4J1J1|A0A0R4J1J1_MOUSE MCG114807, isoform CRA_c OS=Mus musculus OX=10090 GN=Pnkd PE=1 SV=1;sp|Q69ZP3-2|PNKD_MOUSE Isoform 2 of Probable hydrolase PNKD OS=Mus musculus OX=10090 GN=Pnkd;sp|Q69ZP3|PNKD_MOUSE Probable hydrolase PNKD OS=Mus musculus OX=	4	1	1	1	1	1	1	1	1	1	1	1	1	1	1	1	1	1	1	1	1	1	11.3	11.3	11.3	15.57	142	142;142;385;424	4			6			0.00058754	3.5975	By MS/MS	By MS/MS	By MS/MS	By MS/MS	By MS/MS	By MS/MS
Q05BG1;E9QA19;A0A0R4J1K1;Q8BT14-2;Q8BT14;Q8BT14-3	Q05BG1;E9QA19;A0A0R4J1K1;Q8BT14-2;Q8BT14;Q8BT14-3	6;6;6;6;6;6	6;6;6;6;6;6	6;6;6;6;6;6	CCR4-NOT transcription complex subunit 4	Cnot4	tr|Q05BG1|Q05BG1_MOUSE CCR4-NOT transcription complex subunit 4 OS=Mus musculus OX=10090 GN=Cnot4 PE=1 SV=1;tr|E9QA19|E9QA19_MOUSE CCR4-NOT transcription complex subunit 4 OS=Mus musculus OX=10090 GN=Cnot4 PE=1 SV=1;tr|A0A0R4J1K1|A0A0R4J1K1_MOUSE CCR4-NOT	6	6	6	6	6	4	5	5	4	4	6	4	5	5	4	4	6	4	5	5	4	4	11.9	11.9	11.9	70.332	639	639;642;710;572;575;713	4.2	7		13	13	8	0	20.1	By MS/MS	By MS/MS	By MS/MS	By MS/MS	By MS/MS	By MS/MS
A0A0R4J1L2;Q91VK2;F6ZFU0;P57776-2;D3YY68;D3Z7N2	A0A0R4J1L2;Q91VK2;F6ZFU0;P57776-2;D3YY68	19;18;18;17;14;8	1;0;1;1;0;1	1;0;1;1;0;1	Elongation factor 1-delta	Eef1d	tr|A0A0R4J1L2|A0A0R4J1L2_MOUSE Elongation factor 1-delta OS=Mus musculus OX=10090 GN=Eef1d PE=1 SV=1;tr|Q91VK2|Q91VK2_MOUSE Eef1d protein OS=Mus musculus OX=10090 GN=Eef1d PE=1 SV=1;tr|F6ZFU0|F6ZFU0_MOUSE Elongation factor 1-delta (Fragment) OS=Mus musculu	6	19	1	1	18	16	17	17	18	16	1	1	1	1	1	1	1	1	1	1	1	1	76.3	8.2	8.2	28.728	257	257;276;552;257;190;129	3.14	6		2	6		0	5.4925	By MS/MS	By MS/MS	By MS/MS	By MS/MS	By MS/MS	By MS/MS
Q8CEE7;A0A0R4J1N8;D3YVJ8	Q8CEE7;A0A0R4J1N8;D3YVJ8	2;2;1	2;2;1	2;2;1	Retinol dehydrogenase 13	Rdh13	sp|Q8CEE7|RDH13_MOUSE Retinol dehydrogenase 13 OS=Mus musculus OX=10090 GN=Rdh13 PE=1 SV=1;tr|A0A0R4J1N8|A0A0R4J1N8_MOUSE Retinol dehydrogenase 13 OS=Mus musculus OX=10090 GN=Rdh13 PE=1 SV=1;tr|D3YVJ8|D3YVJ8_MOUSE Retinol dehydrogenase 13 (Fragment) OS=Mus	3	2	2	2	1	2	2	2	1	2	1	2	2	2	1	2	1	2	2	2	1	2	6.3	6.3	6.3	36.464	334	334;299;115	3.92	3		6		4	0.00060877	4.2368	By MS/MS	By MS/MS	By MS/MS	By MS/MS	By MS/MS	By MS/MS
A0A0R4J1N9;P40630-2;P40630;D3Z0F3	A0A0R4J1N9;P40630-2;P40630;D3Z0F3	7;7;7;5	7;7;7;5	7;7;7;5	Transcription factor A, mitochondrial	Tfam	tr|A0A0R4J1N9|A0A0R4J1N9_MOUSE Transcription factor A, mitochondrial OS=Mus musculus OX=10090 GN=Tfam PE=1 SV=1;sp|P40630-2|TFAM_MOUSE Isoform Nuclear of Transcription factor A, mitochondrial OS=Mus musculus OX=10090 GN=Tfam;sp|P40630|TFAM_MOUSE Transcript	4	7	7	7	5	7	7	6	5	7	5	7	7	6	5	7	5	7	7	6	5	7	37.2	37.2	37.2	23.384	199	199;215;243;143	3	21	10	20	11		0	20.348	By MS/MS	By MS/MS	By MS/MS	By MS/MS	By MS/MS	By MS/MS
A0A0R4J1Q0;G5E896;D6RE33;Q3UJB9-2;Q3UJB9;F6ZJ27;F6V5I7	A0A0R4J1Q0;G5E896;D6RE33;Q3UJB9-2;Q3UJB9	13;13;12;12;12;3;2	13;13;12;12;12;3;2	13;13;12;12;12;3;2	Enhancer of mRNA-decapping protein 4	Edc4	tr|A0A0R4J1Q0|A0A0R4J1Q0_MOUSE Enhancer of mRNA-decapping protein 4 OS=Mus musculus OX=10090 GN=Edc4 PE=1 SV=1;tr|G5E896|G5E896_MOUSE Enhancer of mRNA decapping 4, isoform CRA_b OS=Mus musculus OX=10090 GN=Edc4 PE=1 SV=1;tr|D6RE33|D6RE33_MOUSE Enhancer of	7	13	13	13	10	8	7	8	9	8	10	8	7	8	9	8	10	8	7	8	9	8	13.8	13.8	13.8	150.65	1390	1390;1406;1318;1390;1406;427;265	4.3	15	6	18	17	30	0	174.83	By MS/MS	By MS/MS	By MS/MS	By MS/MS	By MS/MS	By MS/MS
A0A0R4J1R7;Q9CZL5	A0A0R4J1R7;Q9CZL5	3;2	3;2	3;2	Pterin-4-alpha-carbinolamine dehydratase 2	Pcbd2	tr|A0A0R4J1R7|A0A0R4J1R7_MOUSE Pterin-4-alpha-carbinolamine dehydratase 2 OS=Mus musculus OX=10090 GN=Pcbd2 PE=1 SV=1;sp|Q9CZL5|PHS2_MOUSE Pterin-4-alpha-carbinolamine dehydratase 2 OS=Mus musculus OX=10090 GN=Pcbd2 PE=1 SV=2	2	3	3	3	1	1	1	2	1	2	1	1	1	2	1	2	1	1	1	2	1	2	40.8	40.8	40.8	11.74	103	103;136	5.38				8	5	0.00058423	3.5375	By MS/MS	By MS/MS	By MS/MS	By MS/MS	By MS/MS	By MS/MS
E9QMI6;D3Z4N6;E9QP07;A0A0R4J1S2;Q80W14;Q80W14-3;Q80W14-2	E9QMI6;D3Z4N6;E9QP07;A0A0R4J1S2;Q80W14;Q80W14-3;Q80W14-2	7;7;7;7;7;7;5	5;5;5;5;5;5;3	5;5;5;5;5;5;3	Pre-mRNA-processing factor 40 homolog B	Prpf40b	tr|E9QMI6|E9QMI6_MOUSE Pre-mRNA-processing factor 40 homolog B (Fragment) OS=Mus musculus OX=10090 GN=Prpf40b PE=1 SV=1;tr|D3Z4N6|D3Z4N6_MOUSE Pre-mRNA-processing factor 40 homolog B OS=Mus musculus OX=10090 GN=Prpf40b PE=1 SV=1;tr|E9QP07|E9QP07_MOUSE Pre-	7	7	5	5	5	3	5	5	4	3	5	2	3	5	3	2	5	2	3	5	3	2	8.1	5.9	5.9	97.037	852	852;857;870;873;870;873;557	4.5		5	4	7	4	0	10.152	By MS/MS	By MS/MS	By MS/MS	By MS/MS	By MS/MS	By MS/MS
A0A0R4J1T9;Q9WU79;A0A338P738;F6PYI8	A0A0R4J1T9;Q9WU79;A0A338P738;F6PYI8	2;2;1;1	2;2;1;1	2;2;1;1	Proline dehydrogenase 1, mitochondrial	Prodh	tr|A0A0R4J1T9|A0A0R4J1T9_MOUSE Proline dehydrogenase OS=Mus musculus OX=10090 GN=Prodh PE=1 SV=1;sp|Q9WU79|PROD_MOUSE Proline dehydrogenase 1, mitochondrial OS=Mus musculus OX=10090 GN=Prodh PE=1 SV=2;tr|A0A338P738|A0A338P738_MOUSE Proline dehydrogenase (F	4	2	2	2	1	0	2	1	0	1	1	0	2	1	0	1	1	0	2	1	0	1	7	7	7	56.734	497	497;599;157;244	2.88	3		5			0.00021133	4.9109	By MS/MS		By MS/MS	By MS/MS		By matching
G3X8W7;A0A0R4J1W7;Q8BGZ4;Q8BGZ4-2	G3X8W7;A0A0R4J1W7;Q8BGZ4;Q8BGZ4-2	10;10;10;8	10;10;10;8	10;10;10;8	Cell division cycle protein 23 homolog	Cdc23	tr|G3X8W7|G3X8W7_MOUSE CDC23 (Cell division cycle 23, yeast, homolog), isoform CRA_a OS=Mus musculus OX=10090 GN=Cdc23 PE=1 SV=1;tr|A0A0R4J1W7|A0A0R4J1W7_MOUSE CDC23 (Cell division cycle 23, yeast, homolog), isoform CRA_c OS=Mus musculus OX=10090 GN=Cdc23	4	10	10	10	7	7	9	7	8	8	7	7	9	7	8	8	7	7	9	7	8	8	20	20	20	65.877	571	571;597;597;479	4.34	12		13	12	22	0	43.984	By MS/MS	By MS/MS	By MS/MS	By MS/MS	By MS/MS	By MS/MS
A0A0R4J1X1;E9QLB8;Q566J8	A0A0R4J1X1;E9QLB8;Q566J8	2;2;2	2;2;2	2;2;2	AarF domain-containing protein kinase 4	Adck4	tr|A0A0R4J1X1|A0A0R4J1X1_MOUSE Atypical kinase COQ8B, mitochondrial OS=Mus musculus OX=10090 GN=Coq8b PE=1 SV=1;tr|E9QLB8|E9QLB8_MOUSE Atypical kinase COQ8B, mitochondrial OS=Mus musculus OX=10090 GN=Coq8b PE=1 SV=1;sp|Q566J8|COQ8B_MOUSE Atypical kinase CO	3	2	2	2	1	1	0	0	1	1	1	1	0	0	1	1	1	1	0	0	1	1	10.2	10.2	10.2	33.289	304	304;533;533	2.25	3				1	0	7.8252	By MS/MS	By matching			By matching	By MS/MS
A0A0R4J1Y3;Q8BWU5;E9QMF4;E0CYN9;E0CXW7;E0CYK9	A0A0R4J1Y3;Q8BWU5;E9QMF4;E0CYN9	9;9;6;5;4;4	9;9;6;5;4;4	9;9;6;5;4;4	Probable tRNA N6-adenosine threonylcarbamoyltransferase	Osgep	tr|A0A0R4J1Y3|A0A0R4J1Y3_MOUSE Probable tRNA N6-adenosine threonylcarbamoyltransferase OS=Mus musculus OX=10090 GN=Osgep PE=1 SV=1;sp|Q8BWU5|OSGEP_MOUSE Probable tRNA N6-adenosine threonylcarbamoyltransferase OS=Mus musculus OX=10090 GN=Osgep PE=1 SV=2;tr|	6	9	9	9	6	6	6	6	6	8	6	6	6	6	6	8	6	6	6	6	6	8	30.1	30.1	30.1	36.346	335	335;335;186;254;80;156	3.11	30	12	9	13	11	0	92.889	By MS/MS	By MS/MS	By MS/MS	By MS/MS	By MS/MS	By MS/MS
F6TWX0;F7DFJ2;A0A0R4J1Y8;E0CYF3;Q9DBV7;P23708-2;P23708	F6TWX0;F7DFJ2;A0A0R4J1Y8;E0CYF3;Q9DBV7;P23708-2;P23708	1;1;1;1;1;1;1	1;1;1;1;1;1;1	1;1;1;1;1;1;1	Nuclear transcription factor Y subunit alpha	Nfya	tr|F6TWX0|F6TWX0_MOUSE Nuclear transcription factor Y subunit alpha (Fragment) OS=Mus musculus OX=10090 GN=Nfya PE=1 SV=1;tr|F7DFJ2|F7DFJ2_MOUSE Nuclear transcription factor Y subunit alpha (Fragment) OS=Mus musculus OX=10090 GN=Nfya PE=1 SV=1;tr|A0A0R4J1Y	7	1	1	1	1	0	1	1	0	0	1	0	1	1	0	0	1	0	1	1	0	0	11.1	11.1	11.1	22.649	208	208;211;312;341;347;318;346	3		5				0.0028912	2.5699	By MS/MS		By MS/MS	By matching
Q9CR67;A0A0R4J1Z3;E0CXY5	Q9CR67;A0A0R4J1Z3;E0CXY5	2;2;1	2;2;1	2;2;1	Transmembrane protein 33	Tmem33	sp|Q9CR67|TMM33_MOUSE Transmembrane protein 33 OS=Mus musculus OX=10090 GN=Tmem33 PE=1 SV=1;tr|A0A0R4J1Z3|A0A0R4J1Z3_MOUSE Transmembrane protein 33 OS=Mus musculus OX=10090 GN=Tmem33 PE=1 SV=1;tr|E0CXY5|E0CXY5_MOUSE Transmembrane protein 33 (Fragment) OS=M	3	2	2	2	1	0	1	2	1	2	1	0	1	2	1	2	1	0	1	2	1	2	7.7	7.7	7.7	28.031	247	247;246;42	4.44	1		3	3	2	0.00058766	3.5989	By matching		By matching	By MS/MS	By MS/MS	By MS/MS
A0A0R4J205;Q8C1Z8	A0A0R4J205;Q8C1Z8	5;5	5;5	5;5	tRNA methyltransferase 10 homolog A	Trmt10a	tr|A0A0R4J205|A0A0R4J205_MOUSE tRNA methyltransferase 10 homolog A OS=Mus musculus OX=10090 GN=Trmt10a PE=1 SV=1;sp|Q8C1Z8|TM10A_MOUSE tRNA methyltransferase 10 homolog A OS=Mus musculus OX=10090 GN=Trmt10a PE=2 SV=2	2	5	5	5	4	3	4	3	3	2	4	3	4	3	3	2	4	3	4	3	3	2	17.3	17.3	17.3	38.226	330	330;328	3.76	5	5	7	2	6	0	28.257	By MS/MS	By MS/MS	By MS/MS	By MS/MS	By MS/MS	By MS/MS
Q3UFS4;A0A0R4J215;A0A3B2WAW3	Q3UFS4;A0A0R4J215;A0A3B2WAW3	2;2;1	2;2;1	2;2;1	G patch domain-containing protein 11	Gpatch11	sp|Q3UFS4|GPT11_MOUSE G patch domain-containing protein 11 OS=Mus musculus OX=10090 GN=Gpatch11 PE=1 SV=2;tr|A0A0R4J215|A0A0R4J215_MOUSE G patch domain-containing protein 11 OS=Mus musculus OX=10090 GN=Gpatch11 PE=1 SV=1;tr|A0A3B2WAW3|A0A3B2WAW3_MOUSE G pa	3	2	2	2	2	1	2	1	2	1	2	1	2	1	2	1	2	1	2	1	2	1	8	8	8	30.608	262	262;264;92	2.93	5	6			3	0	6.468	By MS/MS	By MS/MS	By MS/MS	By MS/MS	By MS/MS	By MS/MS
A0A0R4J233;A0A1W2P6J7;Q8C650-2;Q8C650;A0A1W2P866	A0A0R4J233;A0A1W2P6J7;Q8C650-2;Q8C650;A0A1W2P866	3;3;3;3;2	2;2;2;2;2	2;2;2;2;2	Septin-10	2020-09-10	tr|A0A0R4J233|A0A0R4J233_MOUSE Septin 10 OS=Mus musculus OX=10090 GN=Sept10 PE=1 SV=1;tr|A0A1W2P6J7|A0A1W2P6J7_MOUSE Septin 10 OS=Mus musculus OX=10090 GN=Sept10 PE=1 SV=1;sp|Q8C650-2|SEP10_MOUSE Isoform 2 of Septin-10 OS=Mus musculus OX=10090 GN=Septin10;	5	3	2	2	1	1	2	2	1	1	0	0	1	1	0	0	0	0	1	1	0	0	11.7	9.6	9.6	49.829	427	427;452;427;452;196	1	2					0.0022116	2.7963	By matching	By matching	By MS/MS	By MS/MS	By matching	By matching
A0A0R4J243;Q8BR65	A0A0R4J243;Q8BR65	3;3	3;3	3;3	Sin3 histone deacetylase corepressor complex component SDS3	Suds3	tr|A0A0R4J243|A0A0R4J243_MOUSE Sin3 histone deacetylase corepressor complex component SDS3 OS=Mus musculus OX=10090 GN=Suds3 PE=1 SV=1;sp|Q8BR65|SDS3_MOUSE Sin3 histone deacetylase corepressor complex component SDS3 OS=Mus musculus OX=10090 GN=Suds3 PE=1 S	2	3	3	3	1	3	3	2	1	2	1	3	3	2	1	2	1	3	3	2	1	2	10.2	10.2	10.2	38.801	332	332;328	4.17	2		6		4	0	7.1669	By MS/MS	By MS/MS	By MS/MS	By MS/MS	By MS/MS	By MS/MS
V9GXH2;A0A0R4J250;Q61070;V9GXU0	V9GXH2;A0A0R4J250;Q61070;V9GXU0	2;2;2;1	2;2;2;1	2;2;2;1	Etoposide-induced protein 2.4	Ei24	tr|V9GXH2|V9GXH2_MOUSE Etoposide-induced protein 2.4 (Fragment) OS=Mus musculus OX=10090 GN=Ei24 PE=1 SV=1;tr|A0A0R4J250|A0A0R4J250_MOUSE Etoposide induced 2.4 mRNA OS=Mus musculus OX=10090 GN=Ei24 PE=1 SV=1;sp|Q61070|EI24_MOUSE Etoposide-induced protein 2	4	2	2	2	1	2	2	1	1	2	1	2	2	1	1	2	1	2	2	1	1	2	10.5	10.5	10.5	20.799	181	181;358;340;171	4	4		3		6	0.0004085	4.3679	By MS/MS	By MS/MS	By MS/MS	By MS/MS	By MS/MS	By MS/MS
A0A0R4J254;Q9ESJ0	A0A0R4J254;Q9ESJ0	5;5	5;5	5;5	Exportin-4	Xpo4	tr|A0A0R4J254|A0A0R4J254_MOUSE Exportin-4 OS=Mus musculus OX=10090 GN=Xpo4 PE=1 SV=1;sp|Q9ESJ0|XPO4_MOUSE Exportin-4 OS=Mus musculus OX=10090 GN=Xpo4 PE=1 SV=2	2	5	5	5	4	4	4	4	3	4	4	4	4	4	3	4	4	4	4	4	3	4	4.9	4.9	4.9	129.96	1151	1151;1151	5.08			6	12	8	0	12.334	By MS/MS	By MS/MS	By MS/MS	By MS/MS	By MS/MS	By MS/MS
A0A0R4J260;B2RRE7	A0A0R4J260;B2RRE7	10;10	10;10	10;10	OTU domain-containing protein 4	Otud4	tr|A0A0R4J260|A0A0R4J260_MOUSE OTU domain-containing protein 4 OS=Mus musculus OX=10090 GN=Otud4 PE=1 SV=1;sp|B2RRE7|OTUD4_MOUSE OTU domain-containing protein 4 OS=Mus musculus OX=10090 GN=Otud4 PE=1 SV=1	2	10	10	10	8	6	9	8	8	8	8	6	9	8	8	8	8	6	9	8	8	8	13.5	13.5	13.5	122.93	1106	1106;1107	3.57	23	6	29	13	13	0	98.055	By MS/MS	By MS/MS	By MS/MS	By MS/MS	By MS/MS	By MS/MS
Q7TMF3;A0A0R4J275;F6RBR6	Q7TMF3;A0A0R4J275	6;6;2	6;6;2	6;6;2	NADH dehydrogenase [ubiquinone] 1 alpha subcomplex subunit 12	Ndufa12	sp|Q7TMF3|NDUAC_MOUSE NADH dehydrogenase [ubiquinone] 1 alpha subcomplex subunit 12 OS=Mus musculus OX=10090 GN=Ndufa12 PE=1 SV=2;tr|A0A0R4J275|A0A0R4J275_MOUSE NADH dehydrogenase [ubiquinone] 1 alpha subcomplex subunit 12 OS=Mus musculus OX=10090 GN=Ndufa	3	6	6	6	6	5	5	4	5	5	6	5	5	4	5	5	6	5	5	4	5	5	39.3	39.3	39.3	17.086	145	145;149;85	4.41	10		7	6	21	0	18.366	By MS/MS	By MS/MS	By MS/MS	By MS/MS	By MS/MS	By MS/MS
Q7TMV3;A0A0R4J291;F2Z402	Q7TMV3;A0A0R4J291;F2Z402	2;2;1	2;2;1	2;2;1	FAST kinase domain-containing protein 5	Fastkd5;Ubox5	sp|Q7TMV3|FAKD5_MOUSE FAST kinase domain-containing protein 5, mitochondrial OS=Mus musculus OX=10090 GN=Fastkd5 PE=2 SV=1;tr|A0A0R4J291|A0A0R4J291_MOUSE FAST kinase domain-containing protein 5, mitochondrial OS=Mus musculus OX=10090 GN=Fastkd5 PE=1 SV=1;t	3	2	2	2	2	2	1	2	2	2	2	2	1	2	2	2	2	2	1	2	2	2	2.6	2.6	2.6	86.599	762	762;807;598	5.79				3	11	0.00041034	4.4427	By MS/MS	By MS/MS	By MS/MS	By MS/MS	By MS/MS	By MS/MS
A0A0R4J293;Q9JLF6	A0A0R4J293;Q9JLF6	5;5	5;5	5;5	Protein-glutamine gamma-glutamyltransferase K	Tgm1	tr|A0A0R4J293|A0A0R4J293_MOUSE Protein-glutamine gamma-glutamyltransferase K OS=Mus musculus OX=10090 GN=Tgm1 PE=1 SV=1;sp|Q9JLF6|TGM1_MOUSE Protein-glutamine gamma-glutamyltransferase K OS=Mus musculus OX=10090 GN=Tgm1 PE=1 SV=2	2	5	5	5	4	5	4	4	3	5	4	5	4	4	3	5	4	5	4	4	3	5	8.1	8.1	8.1	89.795	815	815;815	3.92	3	10	13	6	5	0	24.414	By MS/MS	By MS/MS	By MS/MS	By MS/MS	By MS/MS	By MS/MS
E9PUG7;A0A0R4J298;Q61211;Q61211-2;Q8C8I3	E9PUG7;A0A0R4J298;Q61211;Q61211-2;Q8C8I3	11;11;11;11;7	11;11;11;11;7	11;11;11;11;7	Eukaryotic translation initiation factor 2D	Eif2d	tr|E9PUG7|E9PUG7_MOUSE Eukaryotic translation initiation factor 2D OS=Mus musculus OX=10090 GN=Eif2d PE=1 SV=1;tr|A0A0R4J298|A0A0R4J298_MOUSE Eukaryotic translation initiation factor 2D OS=Mus musculus OX=10090 GN=Eif2d PE=1 SV=1;sp|Q61211|EIF2D_MOUSE Euka	5	11	11	11	7	9	9	8	7	8	7	9	9	8	7	8	7	9	9	8	7	8	27.5	27.5	27.5	60.877	552	552;587;570;587;453	3.96	16	7	16	12	20	0	64.176	By MS/MS	By MS/MS	By MS/MS	By MS/MS	By MS/MS	By MS/MS
Q9Z0H4-9;S4R1S7;Q9Z0H4-6;Q9Z0H4-2;Q9Z0H4-8;Q9Z0H4;Q9Z0H4-4;Q9Z0H4-5;Q9Z0H4-7;Q9Z0H4-11;V9GX43;E9QA47;S4R2U7;A0A0R4J2B0;S4R2L5;S4R2J2;A3KGT0;S4R2S7;S4R2U1	Q9Z0H4-9;S4R1S7;Q9Z0H4-6;Q9Z0H4-2;Q9Z0H4-8;Q9Z0H4;Q9Z0H4-4;Q9Z0H4-5;Q9Z0H4-7;Q9Z0H4-11;V9GX43;E9QA47;S4R2U7;A0A0R4J2B0;S4R2L5;S4R2J2;A3KGT0	5;5;5;5;5;5;5;5;5;5;5;5;5;5;4;3;3;2;1	3;3;3;3;3;3;3;3;3;3;3;3;3;3;3;2;2;1;1	3;3;3;3;3;3;3;3;3;3;3;3;3;3;3;2;2;1;1	CUGBP Elav-like family member 2	Celf2	sp|Q9Z0H4-9|CELF2_MOUSE Isoform 9 of CUGBP Elav-like family member 2 OS=Mus musculus OX=10090 GN=Celf2;tr|S4R1S7|S4R1S7_MOUSE CUGBP Elav-like family member 2 OS=Mus musculus OX=10090 GN=Celf2 PE=1 SV=1;sp|Q9Z0H4-6|CELF2_MOUSE Isoform 6 of CUGBP Elav-like f	19	5	3	3	3	3	4	3	2	3	1	2	2	1	1	2	1	2	2	1	1	2	9.5	5.5	5.5	56.327	526	526;472;524;520;512;508;490;488;484;464;443;478;460;440;134;92;159;276;46	5.42				7	5	0	7.0215	By MS/MS	By MS/MS	By MS/MS	By MS/MS	By MS/MS	By MS/MS
A0A0R4J2B6;Q8BX09;A0A087WST2;A0A087WQU2;A0A087WRV7	A0A0R4J2B6;Q8BX09;A0A087WST2;A0A087WQU2;A0A087WRV7	4;4;3;2;2	1;1;0;1;1	1;1;0;1;1	Retinoblastoma-binding protein 5	Rbbp5	tr|A0A0R4J2B6|A0A0R4J2B6_MOUSE Retinoblastoma-binding protein 5 OS=Mus musculus OX=10090 GN=Rbbp5 PE=1 SV=1;sp|Q8BX09|RBBP5_MOUSE Retinoblastoma-binding protein 5 OS=Mus musculus OX=10090 GN=Rbbp5 PE=1 SV=2;tr|A0A087WST2|A0A087WST2_MOUSE Retinoblastoma-bin	5	4	1	1	2	2	4	3	3	4	0	0	1	1	1	1	0	0	1	1	1	1	12.5	4.3	4.3	59.026	537	537;538;410;107;149	4			4			0.0022222	2.8324	By matching	By matching	By MS/MS	By MS/MS	By MS/MS	By matching
A0A0R4J2D0;Q8C0R0-2;Q8C0R0	A0A0R4J2D0;Q8C0R0-2;Q8C0R0	3;3;3	3;3;3	3;3;3	Ubiquitin carboxyl-terminal hydrolase 37	Usp37	tr|A0A0R4J2D0|A0A0R4J2D0_MOUSE Ubiquitin carboxyl-terminal hydrolase OS=Mus musculus OX=10090 GN=Usp37 PE=1 SV=1;sp|Q8C0R0-2|UBP37_MOUSE Isoform 2 of Ubiquitin carboxyl-terminal hydrolase 37 OS=Mus musculus OX=10090 GN=Usp37;sp|Q8C0R0|UBP37_MOUSE Ubiquitin	3	3	3	3	3	0	2	1	0	1	3	0	2	1	0	1	3	0	2	1	0	1	3.4	3.4	3.4	110.03	979	979;957;979	5.14			3		4	0	9.6251	By MS/MS		By MS/MS	By matching		By matching
A2RTH5;A0A0U1RNF2	A2RTH5;A0A0U1RNF2	3;3	3;3	3;3		Lcmt1	tr|A2RTH5|A2RTH5_MOUSE Leucine carboxyl methyltransferase 1 OS=Mus musculus OX=10090 GN=Lcmt1 PE=1 SV=1;tr|A0A0U1RNF2|A0A0U1RNF2_MOUSE Leucine carboxyl methyltransferase 1 OS=Mus musculus OX=10090 GN=Lcmt1 PE=1 SV=1	2	3	3	3	2	1	2	1	2	1	2	1	2	1	2	1	2	1	2	1	2	1	10.2	10.2	10.2	38.192	332	332;332	3.22	3	2		4		0.0022243	2.843	By MS/MS	By matching	By MS/MS	By matching	By MS/MS	By MS/MS
A0A0U1RNK7;E9PX48;A2A9M5;A2A9M4;Q8R1A4-2;Q8R1A4;Q8C147;A2AW79;F6ZJ55;A0A0U1RNY4	A0A0U1RNK7;E9PX48;A2A9M5;A2A9M4;Q8R1A4-2;Q8R1A4	12;12;12;12;12;12;2;1;1;1	12;12;12;12;12;12;2;1;1;1	10;10;10;10;10;10;1;1;1;1	Dedicator of cytokinesis protein 7	Dock7	tr|A0A0U1RNK7|A0A0U1RNK7_MOUSE Dedicator of cytokinesis protein 7 OS=Mus musculus OX=10090 GN=Dock7 PE=1 SV=1;tr|E9PX48|E9PX48_MOUSE Dedicator of cytokinesis protein 7 OS=Mus musculus OX=10090 GN=Dock7 PE=1 SV=2;tr|A2A9M5|A2A9M5_MOUSE Dedicator of cytokine	10	12	12	10	9	9	8	9	7	7	9	9	8	9	7	7	7	8	7	7	5	6	7	7	6.5	238.09	2098	2098;2100;2128;2130;2128;2130;2100;247;255;811	4.1	11		26	9	15	0	40.636	By MS/MS	By MS/MS	By MS/MS	By MS/MS	By MS/MS	By MS/MS
D3Z7R0;A0A0U1RQ97;A0A0U1RNL7;A0A0U1RPT4;O55028	D3Z7R0;A0A0U1RQ97;A0A0U1RNL7;A0A0U1RPT4;O55028	3;3;3;3;3	3;3;3;3;3	3;3;3;3;3	[3-methyl-2-oxobutanoate dehydrogenase [lipoamide]] kinase, mitochondrial	Bckdk	tr|D3Z7R0|D3Z7R0_MOUSE Protein-serine/threonine kinase (Fragment) OS=Mus musculus OX=10090 GN=Bckdk PE=1 SV=1;tr|A0A0U1RQ97|A0A0U1RQ97_MOUSE Protein-serine/threonine kinase (Fragment) OS=Mus musculus OX=10090 GN=Bckdk PE=1 SV=2;tr|A0A0U1RNL7|A0A0U1RNL7_MOU	5	3	3	3	3	3	2	3	3	1	3	3	2	3	3	1	3	3	2	3	3	1	18.2	18.2	18.2	24.351	214	214;216;335;365;412	3.87		6	5	4		0	21.206	By MS/MS	By MS/MS	By MS/MS	By MS/MS	By MS/MS	By MS/MS
A0A0U1RNL9;A0A0U1RNL1;F8VPK3;P56671;A0A0U1RPH5	A0A0U1RNL9;A0A0U1RNL1;F8VPK3;P56671	4;3;3;3;1	4;3;3;3;1	4;3;3;3;1	Myc-associated zinc finger protein	Maz	tr|A0A0U1RNL9|A0A0U1RNL9_MOUSE Myc-associated zinc finger protein OS=Mus musculus OX=10090 GN=Maz PE=1 SV=1;tr|A0A0U1RNL1|A0A0U1RNL1_MOUSE Myc-associated zinc finger protein OS=Mus musculus OX=10090 GN=Maz PE=1 SV=1;tr|F8VPK3|F8VPK3_MOUSE Myc-associated zi	5	4	4	4	4	3	4	3	3	3	4	3	4	3	3	3	4	3	4	3	3	3	12.8	12.8	12.8	51.19	493	493;454;477;477;172	5.39	1		6		21	0	12.689	By MS/MS	By MS/MS	By MS/MS	By MS/MS	By MS/MS	By MS/MS
A0A0U1RNN0;P35456-2;P35456	A0A0U1RNN0;P35456-2;P35456	1;1;1	1;1;1	1;1;1	Urokinase plasminogen activator surface receptor	Plaur	tr|A0A0U1RNN0|A0A0U1RNN0_MOUSE Plasminogen activator, urokinase receptor, isoform CRA_a OS=Mus musculus OX=10090 GN=Plaur PE=1 SV=1;sp|P35456-2|UPAR_MOUSE Isoform 2 of Urokinase plasminogen activator surface receptor OS=Mus musculus OX=10090 GN=Plaur;sp|P3	3	1	1	1	1	0	0	1	0	0	1	0	0	1	0	0	1	0	0	1	0	0	7.2	7.2	7.2	24.673	222	222;222;327	3		2				0.0023849	2.7522	By MS/MS			By MS/MS
Q6NV66;A0A0U1RNR6;D3Z083	Q6NV66;A0A0U1RNR6;D3Z083	2;2;1	2;2;1	2;2;1		Zfp646	sp|Q6NV66|ZN646_MOUSE Zinc finger protein 646 OS=Mus musculus OX=10090 GN=Zfp646 PE=1 SV=1;tr|A0A0U1RNR6|A0A0U1RNR6_MOUSE Zinc finger protein 646 (Fragment) OS=Mus musculus OX=10090 GN=Zfp646 PE=1 SV=1;tr|D3Z083|D3Z083_MOUSE Zinc finger protein 646 (Fragme	3	2	2	2	2	1	1	2	1	1	2	1	1	2	1	1	2	1	1	2	1	1	1	1	1	196.8	1788	1788;1562;512	6					8	0.00077549	3.4698	By MS/MS	By matching	By MS/MS	By MS/MS	By MS/MS	By matching
A0A0U1RNS1;Q9DA08	A0A0U1RNS1;Q9DA08	2;2	2;2	2;2	SAGA-associated factor 29 homolog	Ccdc101	tr|A0A0U1RNS1|A0A0U1RNS1_MOUSE SAGA-associated factor 29 (Fragment) OS=Mus musculus OX=10090 GN=Sgf29 PE=1 SV=1;sp|Q9DA08|SGF29_MOUSE SAGA-associated factor 29 OS=Mus musculus OX=10090 GN=Sgf29 PE=2 SV=1	2	2	2	2	2	2	2	2	2	2	2	2	2	2	2	2	2	2	2	2	2	2	13.1	13.1	13.1	17.876	160	160;293	4.38		7			6	0.0011368	3.1446	By MS/MS	By MS/MS	By MS/MS	By MS/MS	By MS/MS	By MS/MS
A0A0U1RPD7;A0A0U1RNW0;A0A0U1RPM8;Q6P2B2;Q99K78;A0A494BAP2;A0A0U1RP94;Q8BVP5;Q8C4X2;Q8BTH8;A0A140LHR2;A0A0U1RPL1	A0A0U1RPD7;A0A0U1RNW0;A0A0U1RPM8;Q6P2B2;Q99K78;A0A494BAP2;A0A0U1RP94;Q8BVP5;Q8C4X2;Q8BTH8;A0A140LHR2;A0A0U1RPL1	2;2;2;2;2;2;2;2;2;2;1;1	2;2;2;2;2;2;2;2;2;2;1;1	2;2;2;2;2;2;2;2;2;2;1;1	Casein kinase I isoform gamma-2;Casein kinase I isoform gamma-3;Casein kinase I isoform gamma-1	Csnk1g1;Csnk1g2;Csnk1g3	tr|A0A0U1RPD7|A0A0U1RPD7_MOUSE Casein kinase I isoform gamma-1 OS=Mus musculus OX=10090 GN=Csnk1g1 PE=1 SV=1;tr|A0A0U1RNW0|A0A0U1RNW0_MOUSE Casein kinase I isoform gamma-1 OS=Mus musculus OX=10090 GN=Csnk1g1 PE=1 SV=1;tr|A0A0U1RPM8|A0A0U1RPM8_MOUSE Casein	12	2	2	2	2	2	1	2	1	2	2	2	1	2	1	2	2	2	1	2	1	2	5.1	5.1	5.1	45.076	390	390;422;424;430;442;448;461;415;424;459;114;164	4.38	3			6	4	0.00021106	4.8873	By MS/MS	By MS/MS	By MS/MS	By MS/MS	By MS/MS	By MS/MS
A0A0U1RPG9;A0A0U1RNX4;Q3TLD5-2;Q3TLD5	A0A0U1RPG9;A0A0U1RNX4;Q3TLD5-2;Q3TLD5	5;5;5;5	5;5;5;5	5;5;5;5	Unconventional prefoldin RPB5 interactor	Uri1	tr|A0A0U1RPG9|A0A0U1RPG9_MOUSE Unconventional prefoldin RPB5 interactor (Fragment) OS=Mus musculus OX=10090 GN=Uri1 PE=1 SV=1;tr|A0A0U1RNX4|A0A0U1RNX4_MOUSE Unconventional prefoldin RPB5 interactor (Fragment) OS=Mus musculus OX=10090 GN=Uri1 PE=1 SV=1;sp|Q	4	5	5	5	5	4	4	5	3	4	5	4	4	5	3	4	5	4	4	5	3	4	17.7	17.7	17.7	58.488	526	526;533;457;531	3.03	5	17	5	3		0	66.233	By MS/MS	By MS/MS	By MS/MS	By MS/MS	By MS/MS	By MS/MS
A0A0U1RPB1;Q505D7	A0A0U1RPB1;Q505D7	2;2	2;2	2;2	Optic atrophy 3 protein homolog	Opa3	tr|A0A0U1RPB1|A0A0U1RPB1_MOUSE Optic atrophy 3 (Human), isoform CRA_b OS=Mus musculus OX=10090 GN=Opa3 PE=1 SV=1;sp|Q505D7|OPA3_MOUSE Optic atrophy 3 protein homolog OS=Mus musculus OX=10090 GN=Opa3 PE=1 SV=1	2	2	2	2	2	2	2	2	1	1	2	2	2	2	1	1	2	2	2	2	1	1	7.7	7.7	7.7	23.887	208	208;179	5.5				5	5	0.0037574	2.4334	By MS/MS	By MS/MS	By MS/MS	By MS/MS	By MS/MS	By matching
A0A0U1RPD8;Q8K284-2;Q8K284;Q8K284-3;A0A0U1RNK8;A0A0U1RP70	A0A0U1RPD8;Q8K284-2;Q8K284	13;13;13;2;1;1	13;13;13;2;1;1	13;13;13;2;1;1	General transcription factor 3C polypeptide 1	Gtf3c1	tr|A0A0U1RPD8|A0A0U1RPD8_MOUSE General transcription factor 3C polypeptide 1 OS=Mus musculus OX=10090 GN=Gtf3c1 PE=1 SV=1;sp|Q8K284-2|TF3C1_MOUSE Isoform 2 of General transcription factor 3C polypeptide 1 OS=Mus musculus OX=10090 GN=Gtf3c1;sp|Q8K284|TF3C1_	6	13	13	13	9	8	9	7	9	4	9	8	9	7	9	4	9	8	9	7	9	4	7.2	7.2	7.2	226.76	2005	2005;2005;2101;219;193;294	4.27	9	5	11	25	12	0	48.827	By MS/MS	By MS/MS	By MS/MS	By MS/MS	By MS/MS	By MS/MS
A0A0U1RPL0;Q7TQH0-3;Q7TQH0-2;Q3TGG2;Q7TQH0;E9Q5Q0;J3QP59	A0A0U1RPL0;Q7TQH0-3;Q7TQH0-2;Q3TGG2;Q7TQH0;E9Q5Q0	27;27;27;26;26;25;8	27;27;27;26;26;25;8	27;27;27;26;26;25;8	Ataxin-2-like protein	Atxn2l	tr|A0A0U1RPL0|A0A0U1RPL0_MOUSE Ataxin-2-like protein OS=Mus musculus OX=10090 GN=Atxn2l PE=1 SV=1;sp|Q7TQH0-3|ATX2L_MOUSE Isoform 3 of Ataxin-2-like protein OS=Mus musculus OX=10090 GN=Atxn2l;sp|Q7TQH0-2|ATX2L_MOUSE Isoform 2 of Ataxin-2-like protein OS=Mu	7	27	27	27	26	21	26	25	22	24	26	21	26	25	22	24	26	21	26	25	22	24	30.3	30.3	30.3	115.26	1096	1096;1043;1074;994;1049;863;218	3.19	82	53	67	27	31	0	323.31	By MS/MS	By MS/MS	By MS/MS	By MS/MS	By MS/MS	By MS/MS
A0A0U1RPS0;P62743	A0A0U1RPS0;P62743	2;2	2;2	2;2	AP-2 complex subunit sigma	Ap2s1	tr|A0A0U1RPS0|A0A0U1RPS0_MOUSE AP-2 complex subunit sigma OS=Mus musculus OX=10090 GN=Ap2s1 PE=1 SV=1;sp|P62743|AP2S1_MOUSE AP-2 complex subunit sigma OS=Mus musculus OX=10090 GN=Ap2s1 PE=1 SV=1	2	2	2	2	2	1	2	1	1	1	2	1	2	1	1	1	2	1	2	1	1	1	36.7	36.7	36.7	7.1361	60	60;142	3.64	6		8	6	2	0	6.4921	By MS/MS	By MS/MS	By MS/MS	By MS/MS	By MS/MS	By MS/MS
A0A0U1RPY6;Q9JKW0	A0A0U1RPY6;Q9JKW0	1;1	1;1	1;1	ADP-ribosylation factor-like protein 6-interacting protein 1	Arl6ip1	tr|A0A0U1RPY6|A0A0U1RPY6_MOUSE ADP-ribosylation factor-like protein 6-interacting protein 1 (Fragment) OS=Mus musculus OX=10090 GN=Arl6ip1 PE=1 SV=1;sp|Q9JKW0|AR6P1_MOUSE ADP-ribosylation factor-like protein 6-interacting protein 1 OS=Mus musculus OX=10090	2	1	1	1	1	1	1	1	1	1	1	1	1	1	1	1	1	1	1	1	1	1	9	9	9	12.934	111	111;203	6					6	0.002053	2.9388	By MS/MS	By MS/MS	By MS/MS	By MS/MS	By MS/MS	By MS/MS
A0A0U1RQ37;Q921J4;A0A0U1RQ22;A0A0U1RQ75	A0A0U1RQ37;Q921J4;A0A0U1RQ22	5;5;3;1	5;5;3;1	5;5;3;1	Ubiquitin-conjugating enzyme E2 S	Ube2s	tr|A0A0U1RQ37|A0A0U1RQ37_MOUSE MCG20927, isoform CRA_b OS=Mus musculus OX=10090 GN=Ube2s PE=1 SV=1;sp|Q921J4|UBE2S_MOUSE Ubiquitin-conjugating enzyme E2 S OS=Mus musculus OX=10090 GN=Ube2s PE=1 SV=1;tr|A0A0U1RQ22|A0A0U1RQ22_MOUSE Ubiquitin-conjugating enzy	4	5	5	5	3	4	5	4	3	4	3	4	5	4	3	4	3	4	5	4	3	4	28.8	28.8	28.8	24.536	226	226;223;151;46	3.8	12	6		10	12	0	61.318	By MS/MS	By MS/MS	By MS/MS	By MS/MS	By MS/MS	By MS/MS
A0A0U1RQ85;P22682;A0A0X1KG61;A0A0U1RP47;A0A0U1RP95	A0A0U1RQ85;P22682;A0A0X1KG61;A0A0U1RP47	9;9;8;6;2	9;9;8;6;2	8;8;7;5;2	E3 ubiquitin-protein ligase CBL	Cbl	tr|A0A0U1RQ85|A0A0U1RQ85_MOUSE E3 ubiquitin-protein ligase CBL OS=Mus musculus OX=10090 GN=Cbl PE=1 SV=1;sp|P22682|CBL_MOUSE E3 ubiquitin-protein ligase CBL OS=Mus musculus OX=10090 GN=Cbl PE=1 SV=3;tr|A0A0X1KG61|A0A0X1KG61_MOUSE E3 ubiquitin-protein ligas	5	9	9	8	6	6	5	6	4	4	6	6	5	6	4	4	5	6	5	6	4	4	15.1	15.1	14.2	98.508	896	896;913;869;895;79	4.94		7	9	11	20	0	25.201	By MS/MS	By MS/MS	By MS/MS	By MS/MS	By MS/MS	By MS/MS
A0A0U1RQA1;D3Z3V3;P42209;D3YVG1;A0A0U1RPA8	A0A0U1RQA1;D3Z3V3;P42209;D3YVG1	4;4;4;2;1	4;4;4;2;1	4;4;4;2;1	Septin-1	2020-09-01	tr|A0A0U1RQA1|A0A0U1RQA1_MOUSE Septin 1 (Fragment) OS=Mus musculus OX=10090 GN=Sept1 PE=1 SV=2;tr|D3Z3V3|D3Z3V3_MOUSE Septin 1 OS=Mus musculus OX=10090 GN=Sept1 PE=1 SV=1;sp|P42209|SEPT1_MOUSE Septin-1 OS=Mus musculus OX=10090 GN=Septin1 PE=1 SV=2;tr|D3YVG	5	4	4	4	3	1	3	2	2	2	3	1	3	2	2	2	3	1	3	2	2	2	14	14	14	37.372	328	328;338;366;186;145	4	10	5		3	16	0	6.2041	By MS/MS	By MS/MS	By MS/MS	By MS/MS	By MS/MS	By MS/MS
A0A0U1RQB6;F8VPR5;P45481;A0A0U1RPL2	A0A0U1RQB6;F8VPR5;P45481	10;10;10;2	5;5;5;1	5;5;5;1	CREB-binding protein	Crebbp	tr|A0A0U1RQB6|A0A0U1RQB6_MOUSE CREB-binding protein OS=Mus musculus OX=10090 GN=Crebbp PE=1 SV=1;tr|F8VPR5|F8VPR5_MOUSE CREB-binding protein OS=Mus musculus OX=10090 GN=Crebbp PE=1 SV=1;sp|P45481|CBP_MOUSE CREB-binding protein OS=Mus musculus OX=10090 GN=C	4	10	5	5	7	6	6	8	7	6	4	4	2	3	4	3	4	4	2	3	4	3	5.6	3.1	3.1	261.21	2403	2403;2441;2441;1107	3.55		11	7	2		0	23.936	By MS/MS	By MS/MS	By MS/MS	By MS/MS	By MS/MS	By MS/MS
A0A140LHA2;Q9WVA3;A0A140LIM5;A0A140LJ21;A0A140LI47	A0A140LHA2;Q9WVA3;A0A140LIM5;A0A140LJ21	11;11;6;6;3	11;11;6;6;3	11;11;6;6;3	Mitotic checkpoint protein BUB3	Bub3	tr|A0A140LHA2|A0A140LHA2_MOUSE Mitotic checkpoint protein BUB3 OS=Mus musculus OX=10090 GN=Bub3 PE=1 SV=1;sp|Q9WVA3|BUB3_MOUSE Mitotic checkpoint protein BUB3 OS=Mus musculus OX=10090 GN=Bub3 PE=1 SV=2;tr|A0A140LIM5|A0A140LIM5_MOUSE Mitotic checkpoint prot	5	11	11	11	9	8	11	8	6	7	9	8	11	8	6	7	9	8	11	8	6	7	41	41	41	36.766	324	324;326;184;220;100	3.43	26	16	29	13	13	0	66.123	By MS/MS	By MS/MS	By MS/MS	By MS/MS	By MS/MS	By MS/MS
A0A140LIH0;A0A140LHQ0;A0A140LHG7;Q8VCB2-2;Q8VCB2;Q8VCB2-3;A0A140LIL1;A0A140LI51	A0A140LIH0;A0A140LHQ0;A0A140LHG7;Q8VCB2-2;Q8VCB2;Q8VCB2-3;A0A140LIL1;A0A140LI51	2;2;2;2;2;2;1;1	2;2;2;2;2;2;1;1	2;2;2;2;2;2;1;1	Mediator of RNA polymerase II transcription subunit 25	Med25	tr|A0A140LIH0|A0A140LIH0_MOUSE Mediator of RNA polymerase II transcription subunit 25 (Fragment) OS=Mus musculus OX=10090 GN=Med25 PE=1 SV=1;tr|A0A140LHQ0|A0A140LHQ0_MOUSE Mediator of RNA polymerase II transcription subunit 25 OS=Mus musculus OX=10090 GN=M	8	2	2	2	2	2	2	2	2	2	2	2	2	2	2	2	2	2	2	2	2	2	5.5	5.5	5.5	63.378	599	599;742;801;618;745;822;205;242	3.73	8		2	6	6	0	5.449	By MS/MS	By MS/MS	By MS/MS	By MS/MS	By MS/MS	By MS/MS
A0A140LHR3;A0A140LJ01;A0A140LHG8;Q9CYN2;A0A140LJG6;A0A140LIK0	A0A140LHR3;A0A140LJ01;A0A140LHG8;Q9CYN2;A0A140LJG6;A0A140LIK0	3;3;3;3;2;2	3;3;3;3;2;2	3;3;3;3;2;2	Signal peptidase complex subunit 2	Spcs2	tr|A0A140LHR3|A0A140LHR3_MOUSE Signal peptidase complex subunit 2 OS=Mus musculus OX=10090 GN=Spcs2 PE=1 SV=1;tr|A0A140LJ01|A0A140LJ01_MOUSE Signal peptidase complex subunit 2 (Fragment) OS=Mus musculus OX=10090 GN=Spcs2 PE=1 SV=1;tr|A0A140LHG8|A0A140LHG8_	6	3	3	3	1	1	2	1	2	2	1	1	2	1	2	2	1	1	2	1	2	2	18.9	18.9	18.9	21.997	190	190;252;260;226;123;177	3.89		6		1	2	0	6.0758	By MS/MS	By MS/MS	By MS/MS	By MS/MS	By MS/MS	By MS/MS
A0A140LHL5;Q8VDQ8-3;Q8VDQ8-2;Q8VDQ8;Q8VDQ8-4	A0A140LHL5;Q8VDQ8-3;Q8VDQ8-2;Q8VDQ8;Q8VDQ8-4	2;2;2;2;1	2;2;2;2;1	2;2;2;2;1	NAD-dependent protein deacetylase sirtuin-2	Sirt2	tr|A0A140LHL5|A0A140LHL5_MOUSE NAD-dependent protein deacetylase OS=Mus musculus OX=10090 GN=Sirt2 PE=1 SV=1;sp|Q8VDQ8-3|SIR2_MOUSE Isoform 3 of NAD-dependent protein deacetylase sirtuin-2 OS=Mus musculus OX=10090 GN=Sirt2;sp|Q8VDQ8-2|SIR2_MOUSE Isoform 2	5	2	2	2	1	0	0	0	1	0	1	0	0	0	1	0	1	0	0	0	1	0	6	6	6	39.425	351	351;235;352;389;319	3	1			1		0.008191	2.0764	By MS/MS				By MS/MS
A0A140LJC5;A0A140LHQ1;A0A140LHM2;Q9CQR7	A0A140LJC5;A0A140LHQ1;A0A140LHM2;Q9CQR7	1;1;1;1	1;1;1;1	1;1;1;1	Gamma-secretase subunit PEN-2	Psenen	tr|A0A140LJC5|A0A140LJC5_MOUSE Gamma-secretase subunit PEN-2 (Fragment) OS=Mus musculus OX=10090 GN=Psenen PE=1 SV=1;tr|A0A140LHQ1|A0A140LHQ1_MOUSE Gamma-secretase subunit PEN-2 OS=Mus musculus OX=10090 GN=Psenen PE=1 SV=1;tr|A0A140LHM2|A0A140LHM2_MOUSE Ga	4	1	1	1	0	0	1	0	0	0	0	0	1	0	0	0	0	0	1	0	0	0	26.8	26.8	26.8	5.0759	41	41;66;95;101	4			1			0	22.989			By MS/MS
Q91VM3;Q91VM3-2;A0A140LJJ0;A0A140LJ78;A2AEV2;A0A140LHM4;F6YHS5;A2AEV5;A0A140LHC1;A0A140LJC8;A0A140LIN0;A0A140LJ16;A0A140LJG8;A0A140LHQ5;F7CAT9;A0A140LJ74;A0A140LHZ1;A0A140LHK6;A0A0A0MQH0;F6QP00;A0A140LI37;S4R186;F6Q8K5	Q91VM3;Q91VM3-2;A0A140LJJ0;A0A140LJ78;A2AEV2;A0A140LHM4;F6YHS5;A2AEV5;A0A140LHC1;A0A140LJC8;A0A140LIN0;A0A140LJ16;A0A140LJG8;A0A140LHQ5;F7CAT9;A0A140LJ74;A0A140LHZ1;A0A140LHK6;A0A0A0MQH0;F6QP00;A0A140LI37;S4R186;F6Q8K5	2;2;2;2;2;2;1;1;1;1;1;1;1;1;1;1;1;1;1;1;1;1;1	2;2;2;2;2;2;1;1;1;1;1;1;1;1;1;1;1;1;1;1;1;1;1	2;2;2;2;2;2;1;1;1;1;1;1;1;1;1;1;1;1;1;1;1;1;1	WD repeat domain phosphoinositide-interacting protein 4	Wdr45	sp|Q91VM3|WIPI4_MOUSE WD repeat domain phosphoinositide-interacting protein 4 OS=Mus musculus OX=10090 GN=Wdr45 PE=1 SV=1;sp|Q91VM3-2|WIPI4_MOUSE Isoform 2 of WD repeat domain phosphoinositide-interacting protein 4 OS=Mus musculus OX=10090 GN=Wdr45;tr|A0A1	23	2	2	2	1	2	1	2	2	2	1	2	1	2	2	2	1	2	1	2	2	2	6.9	6.9	6.9	39.787	360	360;346;293;287;224;136;146;325;318;293;289;208;56;80;145;136;136;130;110;109;83;83;145	5			5		5	0	6.6895	By MS/MS	By MS/MS	By MS/MS	By MS/MS	By MS/MS	By matching
A0A140LHU9;A0A140LI54;Q3TRM4-2;Q3TRM4-3;Q3TRM4;Q3TRM4-4;A0A140LHT9;A0A140LJI6	A0A140LHU9;A0A140LI54;Q3TRM4-2;Q3TRM4-3;Q3TRM4;Q3TRM4-4	6;6;6;6;6;3;2;1	6;6;6;6;6;3;2;1	6;6;6;6;6;3;2;1	Neuropathy target esterase	Pnpla6	tr|A0A140LHU9|A0A140LHU9_MOUSE Neuropathy target esterase OS=Mus musculus OX=10090 GN=Pnpla6 PE=1 SV=1;tr|A0A140LI54|A0A140LI54_MOUSE Neuropathy target esterase OS=Mus musculus OX=10090 GN=Pnpla6 PE=1 SV=1;sp|Q3TRM4-2|PLPL6_MOUSE Isoform 2 of Neuropathy ta	8	6	6	6	4	2	3	5	2	4	4	2	3	5	2	4	4	2	3	5	2	4	6.5	6.5	6.5	145.23	1316	1316;1345;1323;1327;1355;1170;207;201	5.38			6	1	14	0	10.91	By MS/MS	By MS/MS	By MS/MS	By MS/MS	By MS/MS	By MS/MS
A0A140LHY2;Q7TMR0;Q7TMR0-2	A0A140LHY2;Q7TMR0	3;3;1	3;3;1	3;3;1	Lysosomal Pro-X carboxypeptidase	Prcp	tr|A0A140LHY2|A0A140LHY2_MOUSE Lysosomal Pro-X carboxypeptidase OS=Mus musculus OX=10090 GN=Prcp PE=1 SV=1;sp|Q7TMR0|PCP_MOUSE Lysosomal Pro-X carboxypeptidase OS=Mus musculus OX=10090 GN=Prcp PE=1 SV=2	3	3	3	3	2	0	1	2	2	2	2	0	1	2	2	2	2	0	1	2	2	2	6.1	6.1	6.1	51.064	456	456;491;105	4.9			4	3	3	0	6.5867	By MS/MS		By matching	By MS/MS	By MS/MS	By matching
A0A140LHY7;Q8BH76;Q9EQ28;A0A140LIW6	A0A140LHY7;Q8BH76;Q9EQ28;A0A140LIW6	9;9;9;7	9;9;9;7	9;9;9;7	DNA polymerase delta subunit 3	Pold3	tr|A0A140LHY7|A0A140LHY7_MOUSE DNA polymerase delta subunit 3 OS=Mus musculus OX=10090 GN=Pold3 PE=1 SV=1;tr|Q8BH76|Q8BH76_MOUSE DNA polymerase delta subunit 3 OS=Mus musculus OX=10090 GN=Pold3 PE=1 SV=1;sp|Q9EQ28|DPOD3_MOUSE DNA polymerase delta subunit 3	4	9	9	9	8	8	9	9	8	9	8	8	9	9	8	9	8	8	9	9	8	9	28.2	28.2	28.2	46.135	422	422;461;462;269	3.65	27	20	11	4	32	0	66.526	By MS/MS	By MS/MS	By MS/MS	By MS/MS	By MS/MS	By MS/MS
Q3TYT1;A0A140LIF0;P97478	Q3TYT1;A0A140LIF0;P97478	2;2;2	2;2;2	2;2;2	5-demethoxyubiquinone hydroxylase, mitochondrial	Coq7	tr|Q3TYT1|Q3TYT1_MOUSE 5-demethoxyubiquinone hydroxylase, mitochondrial OS=Mus musculus OX=10090 GN=Coq7 PE=1 SV=1;tr|A0A140LIF0|A0A140LIF0_MOUSE 5-demethoxyubiquinone hydroxylase, mitochondrial OS=Mus musculus OX=10090 GN=Coq7 PE=1 SV=1;sp|P97478|COQ7_MOU	3	2	2	2	0	1	1	0	1	1	0	1	1	0	1	1	0	1	1	0	1	1	5.9	5.9	5.9	37.68	337	337;222;217	4.75			2	1	1	0.00094805	3.153		By matching	By MS/MS		By MS/MS	By MS/MS
A0A140LJ81;A0A140LIJ1;Q8BGZ2-2;Q8BGZ2	A0A140LJ81;A0A140LIJ1;Q8BGZ2-2;Q8BGZ2	1;1;1;1	1;1;1;1	1;1;1;1	Protein FAM168A	Fam168a	tr|A0A140LJ81|A0A140LJ81_MOUSE Protein FAM168A OS=Mus musculus OX=10090 GN=Fam168a PE=1 SV=1;tr|A0A140LIJ1|A0A140LIJ1_MOUSE Protein FAM168A OS=Mus musculus OX=10090 GN=Fam168a PE=1 SV=1;sp|Q8BGZ2-2|F168A_MOUSE Isoform 2 of Protein FAM168A OS=Mus musculus O	4	1	1	1	1	0	0	0	0	0	1	0	0	0	0	0	1	0	0	0	0	0	14	14	14	13.785	129	129;260;235;244	3		1				0.0011359	3.139	By MS/MS
A0A140LIM7;O08969	A0A140LIM7;O08969	2;2	2;2	2;2	Pleckstrin homology-like domain family A member 2	Phlda2	tr|A0A140LIM7|A0A140LIM7_MOUSE Pleckstrin homology-like domain family A member 2 (Fragment) OS=Mus musculus OX=10090 GN=Phlda2 PE=1 SV=1;sp|O08969|PHLA2_MOUSE Pleckstrin homology-like domain family A member 2 OS=Mus musculus OX=10090 GN=Phlda2 PE=1 SV=1	2	2	2	2	1	2	2	2	1	1	1	2	2	2	1	1	1	2	2	2	1	1	21	21	21	12.173	105	105;144	3.45	2	6			3	0	21.462	By MS/MS	By MS/MS	By MS/MS	By MS/MS	By MS/MS	By MS/MS
A0A140LIQ6;E9QL08;E9Q9Z4;E9Q8T1;Q9JJG0-3;Q9JJG0-2;Q9JJG0;A0A140LIJ2;A0A140LJ29;Q9JJG0-4;A0A140LIQ1;A0A140LJA0;A0A140LI86	A0A140LIQ6;E9QL08;E9Q9Z4;E9Q8T1;Q9JJG0-3;Q9JJG0-2;Q9JJG0;A0A140LIJ2;A0A140LJ29;Q9JJG0-4;A0A140LIQ1	7;7;7;7;7;7;7;6;6;6;5;3;3	7;7;7;7;7;7;7;6;6;6;5;3;3	6;6;6;6;6;6;6;5;5;5;5;3;3	Transforming acidic coiled-coil-containing protein 2	Tacc2	tr|A0A140LIQ6|A0A140LIQ6_MOUSE Transforming acidic coiled-coil-containing protein 2 (Fragment) OS=Mus musculus OX=10090 GN=Tacc2 PE=1 SV=1;tr|E9QL08|E9QL08_MOUSE Transforming acidic coiled-coil-containing protein 2 OS=Mus musculus OX=10090 GN=Tacc2 PE=1 SV	13	7	7	6	3	4	4	4	4	3	3	4	4	4	4	3	3	4	3	4	3	2	10	10	9	91.052	829	829;1036;1146;2879;947;1035;1149;568;696;598;555;910;1020	4.41		7	5	4	6	0	8.5597	By MS/MS	By MS/MS	By MS/MS	By MS/MS	By MS/MS	By MS/MS
A0A140LIT2;O88455	A0A140LIT2;O88455	2;2	2;2	2;2	7-dehydrocholesterol reductase	Dhcr7	tr|A0A140LIT2|A0A140LIT2_MOUSE 7-dehydrocholesterol reductase OS=Mus musculus OX=10090 GN=Dhcr7 PE=1 SV=1;sp|O88455|DHCR7_MOUSE 7-dehydrocholesterol reductase OS=Mus musculus OX=10090 GN=Dhcr7 PE=1 SV=1	2	2	2	2	2	2	2	2	2	2	2	2	2	2	2	2	2	2	2	2	2	2	4.4	4.4	4.4	54.219	474	474;471	4		6		6		0.00020734	4.6069	By MS/MS	By MS/MS	By MS/MS	By MS/MS	By MS/MS	By MS/MS
A0A140LIU4;P56392	A0A140LIU4;P56392	1;1	1;1	1;1	Cytochrome c oxidase subunit 7A1, mitochondrial	Cox7a1	tr|A0A140LIU4|A0A140LIU4_MOUSE Cytochrome c oxidase subunit 7A1, mitochondrial OS=Mus musculus OX=10090 GN=Cox7a1 PE=1 SV=1;sp|P56392|CX7A1_MOUSE Cytochrome c oxidase subunit 7A1, mitochondrial OS=Mus musculus OX=10090 GN=Cox7a1 PE=1 SV=1	2	1	1	1	1	1	0	1	1	1	1	1	0	1	1	1	1	1	0	1	1	1	14.6	14.6	14.6	9.8272	89	89;80	6					6	0.0028876	2.5502	By MS/MS	By MS/MS		By MS/MS	By MS/MS	By MS/MS
E9Q5W5;A0A140LJ04;Q5SSH7-2;Q5SSH7	E9Q5W5;A0A140LJ04;Q5SSH7-2;Q5SSH7	3;3;3;3	3;3;3;3	3;3;3;3	Zinc finger ZZ-type and EF-hand domain-containing protein 1	Zzef1	tr|E9Q5W5|E9Q5W5_MOUSE Zinc finger ZZ-type and EF-hand domain-containing protein 1 OS=Mus musculus OX=10090 GN=Zzef1 PE=1 SV=1;tr|A0A140LJ04|A0A140LJ04_MOUSE Zinc finger ZZ-type and EF-hand domain-containing protein 1 OS=Mus musculus OX=10090 GN=Zzef1 PE=1	4	3	3	3	1	1	1	2	2	1	1	1	1	2	2	1	1	1	1	2	2	1	1.4	1.4	1.4	328.27	2924	2924;2953;2891;2924	5.38			1	3	4	0	8.5279	By MS/MS	By MS/MS	By MS/MS	By MS/MS	By MS/MS	By matching
A0A140LJF0;P70218;Q3UPT4	A0A140LJF0;P70218;Q3UPT4	2;2;1	2;2;1	2;2;1	Mitogen-activated protein kinase kinase kinase kinase 1;Mitogen-activated protein kinase kinase kinase kinase	Map4k1	tr|A0A140LJF0|A0A140LJF0_MOUSE Mitogen activated protein kinase kinase kinase kinase 1, isoform CRA_a OS=Mus musculus OX=10090 GN=Map4k1 PE=1 SV=1;sp|P70218|M4K1_MOUSE Mitogen-activated protein kinase kinase kinase kinase 1 OS=Mus musculus OX=10090 GN=Map4	3	2	2	2	2	2	1	1	2	2	2	2	1	1	2	2	2	2	1	1	2	2	4.7	4.7	4.7	71.168	641	641;827;750	4.09		6		3	2	0	5.8036	By MS/MS	By MS/MS	By MS/MS	By MS/MS	By MS/MS	By MS/MS
E9Q394-2;E9Q394;A0A140LJJ5;A0A140LIX0;A0A140LHQ3;A0A140LID7	E9Q394-2;E9Q394;A0A140LJJ5;A0A140LIX0	7;7;7;4;1;1	7;7;7;4;1;1	7;7;7;4;1;1		Akap13	sp|E9Q394-2|AKP13_MOUSE Isoform 2 of A-kinase anchor protein 13 OS=Mus musculus OX=10090 GN=Akap13;sp|E9Q394|AKP13_MOUSE A-kinase anchor protein 13 OS=Mus musculus OX=10090 GN=Akap13 PE=1 SV=1;tr|A0A140LJJ5|A0A140LJJ5_MOUSE A-kinase anchor protein 13 OS=Mu	6	7	7	7	7	1	4	4	2	2	7	1	4	4	2	2	7	1	4	4	2	2	3.9	3.9	3.9	301.5	2754	2754;2776;2794;870;423;569	3.4		12	8			0	14.027	By MS/MS	By MS/MS	By MS/MS	By MS/MS	By MS/MS	By MS/MS
A0A140T8I9;E9Q3L2	A0A140T8I9;E9Q3L2	8;8	8;8	8;8		Pi4ka	tr|A0A140T8I9|A0A140T8I9_MOUSE Phosphatidylinositol 4-kinase alpha OS=Mus musculus OX=10090 GN=Pi4ka PE=1 SV=1;sp|E9Q3L2|PI4KA_MOUSE Phosphatidylinositol 4-kinase alpha OS=Mus musculus OX=10090 GN=Pi4ka PE=1 SV=2	2	8	8	8	5	4	2	4	2	2	5	4	2	4	2	2	5	4	2	4	2	2	4	4	4	231.35	2044	2044;2105	4.21	1	4	6	5	3	0	10.695	By MS/MS	By MS/MS	By MS/MS	By MS/MS	By MS/MS	By MS/MS
A0A140T8J4;Q9R257	A0A140T8J4;Q9R257	4;4	4;4	4;4	Heme-binding protein 1	Hebp1	tr|A0A140T8J4|A0A140T8J4_MOUSE Heme-binding protein 1 OS=Mus musculus OX=10090 GN=Hebp1 PE=1 SV=1;sp|Q9R257|HEBP1_MOUSE Heme-binding protein 1 OS=Mus musculus OX=10090 GN=Hebp1 PE=1 SV=2	2	4	4	4	3	4	3	3	3	3	3	4	3	3	3	3	3	4	3	3	3	3	27.9	27.9	27.9	21.053	190	190;190	4.12	5		5	12	3	0	10.103	By MS/MS	By MS/MS	By MS/MS	By MS/MS	By MS/MS	By MS/MS
Q6IE82;A0A140T8R5;A0A286YCK1	Q6IE82;A0A140T8R5	10;10;1	10;10;1	9;9;1	Protein Jade-3	Jade3	sp|Q6IE82|JADE3_MOUSE Protein Jade-3 OS=Mus musculus OX=10090 GN=Jade3 PE=1 SV=1;tr|A0A140T8R5|A0A140T8R5_MOUSE Protein Jade-3 OS=Mus musculus OX=10090 GN=Jade3 PE=1 SV=1	3	10	10	9	9	4	4	7	3	6	9	4	4	7	3	6	8	4	4	7	3	6	17.4	17.4	15.7	93.454	823	823;824;122	4.58		7	7	12	7	0	22.259	By MS/MS	By MS/MS	By MS/MS	By MS/MS	By MS/MS	By MS/MS
A0A140T8R7;Q8CFE3	A0A140T8R7;Q8CFE3	7;7	6;6	4;4	REST corepressor 1	Rcor1	tr|A0A140T8R7|A0A140T8R7_MOUSE REST corepressor 1 OS=Mus musculus OX=10090 GN=Rcor1 PE=1 SV=1;sp|Q8CFE3|RCOR1_MOUSE REST corepressor 1 OS=Mus musculus OX=10090 GN=Rcor1 PE=1 SV=3	2	7	6	4	6	6	6	5	7	5	5	5	5	4	6	4	3	3	3	2	4	2	21.7	19.6	14.1	43.886	382	382;480	3.58	13	11	6	6	12	0	61.969	By MS/MS	By MS/MS	By MS/MS	By MS/MS	By MS/MS	By MS/MS
I7HIK9;Q80ZA1;A0A158SIS7;P02340	I7HIK9;Q80ZA1;A0A158SIS7;P02340	4;4;4;4	4;4;4;4	4;4;4;4	Cellular tumor antigen p53	Trp53;Tp53	tr|I7HIK9|I7HIK9_MOUSE Cellular tumor antigen p53 OS=Mus musculus OX=10090 GN=Trp53 PE=1 SV=1;tr|Q80ZA1|Q80ZA1_MOUSE Cellular tumor antigen p53 OS=Mus musculus OX=10090 GN=Trp53 PE=1 SV=1;tr|A0A158SIS7|A0A158SIS7_MOUSE Cellular tumor antigen p53 OS=Mus mus	4	4	4	4	4	3	4	4	4	1	4	3	4	4	4	1	4	3	4	4	4	1	13	13	13	42.15	378	378;381;387;390	4	6	4	4	2	10	0	8.9057	By MS/MS	By MS/MS	By MS/MS	By MS/MS	By MS/MS	By MS/MS
A0A171EBL2;E9Q555	A0A171EBL2;E9Q555	14;14	14;14	14;14	E3 ubiquitin-protein ligase RNF213	Rnf213	tr|A0A171EBL2|A0A171EBL2_MOUSE E3 ubiquitin-protein ligase RNF213 OS=Mus musculus OX=10090 GN=Rnf213 PE=1 SV=1;sp|E9Q555|RN213_MOUSE E3 ubiquitin-protein ligase RNF213 OS=Mus musculus OX=10090 GN=Rnf213 PE=1 SV=2	2	14	14	14	9	8	8	10	9	7	9	8	8	10	9	7	9	8	8	10	9	7	3.2	3.2	3.2	584.62	5151	5151;5152	4.57	2	11	11	11	18	0	28.606	By MS/MS	By MS/MS	By MS/MS	By MS/MS	By MS/MS	By MS/MS
A0A1B0GQZ1;A0A1B0GSZ9;O35972	A0A1B0GQZ1;A0A1B0GSZ9;O35972	3;3;3	3;3;3	3;3;3	39S ribosomal protein L23, mitochondrial	Mrpl23	tr|A0A1B0GQZ1|A0A1B0GQZ1_MOUSE 39S ribosomal protein L23, mitochondrial OS=Mus musculus OX=10090 GN=Mrpl23 PE=1 SV=1;tr|A0A1B0GSZ9|A0A1B0GSZ9_MOUSE 39S ribosomal protein L23, mitochondrial OS=Mus musculus OX=10090 GN=Mrpl23 PE=1 SV=1;sp|O35972|RM23_MOUSE 3	3	3	3	3	2	1	1	1	1	3	2	1	1	1	1	3	2	1	1	1	1	3	30.7	30.7	30.7	11.89	101	101;172;146	3.67		5	3		1	0	16.694	By MS/MS	By MS/MS	By MS/MS	By MS/MS	By MS/MS	By MS/MS
A0A1B0GR08;Q921G8;A0A1B0GRD4;A0A1B0GRD0	A0A1B0GR08;Q921G8	3;3;1;1	3;3;1;1	3;3;1;1	Gamma-tubulin complex component 2	Tubgcp2	tr|A0A1B0GR08|A0A1B0GR08_MOUSE Gamma-tubulin complex component (Fragment) OS=Mus musculus OX=10090 GN=Tubgcp2 PE=1 SV=1;sp|Q921G8|GCP2_MOUSE Gamma-tubulin complex component 2 OS=Mus musculus OX=10090 GN=Tubgcp2 PE=1 SV=2	4	3	3	3	3	3	3	3	3	2	3	3	3	3	3	2	3	3	3	3	3	2	4.1	4.1	4.1	102.74	900	900;905;149;205	4.55	4			12	6	0	9.5549	By MS/MS	By MS/MS	By MS/MS	By MS/MS	By MS/MS	By MS/MS
A0A1B0GR11;Q93092	A0A1B0GR11;Q93092	15;15	15;15	15;15	Transaldolase	Taldo1	tr|A0A1B0GR11|A0A1B0GR11_MOUSE Transaldolase OS=Mus musculus OX=10090 GN=Taldo1 PE=1 SV=1;sp|Q93092|TALDO_MOUSE Transaldolase OS=Mus musculus OX=10090 GN=Taldo1 PE=1 SV=2	2	15	15	15	14	13	13	14	13	12	14	13	13	14	13	12	14	13	13	14	13	12	33.2	33.2	33.2	42.151	382	382;337	3.5	72	21	45	37	45	0	67.958	By MS/MS	By MS/MS	By MS/MS	By MS/MS	By MS/MS	By MS/MS
A0A1B0GR18;Q8VI63-2;Q8VI63	A0A1B0GR18;Q8VI63-2;Q8VI63	1;1;1	1;1;1	1;1;1	MOB kinase activator 2	Mob2	tr|A0A1B0GR18|A0A1B0GR18_MOUSE MOB kinase activator 2 OS=Mus musculus OX=10090 GN=Mob2 PE=1 SV=1;sp|Q8VI63-2|MOB2_MOUSE Isoform 2 of MOB kinase activator 2 OS=Mus musculus OX=10090 GN=Mob2;sp|Q8VI63|MOB2_MOUSE MOB kinase activator 2 OS=Mus musculus OX=1009	3	1	1	1	1	0	1	1	1	1	1	0	1	1	1	1	1	0	1	1	1	1	4.1	4.1	4.1	30.232	266	266;150;235	3		5				0.0020496	2.9208	By matching		By MS/MS	By matching	By MS/MS	By MS/MS
A0A1B0GS22;A0A1B0GSK5;A0A1B0GR19;A0A1B0GR86;Q8BH97	A0A1B0GS22;A0A1B0GSK5;A0A1B0GR19;A0A1B0GR86;Q8BH97	1;1;1;1;1	1;1;1;1;1	1;1;1;1;1	Reticulocalbin-3	Rcn3	tr|A0A1B0GS22|A0A1B0GS22_MOUSE Reticulocalbin-3 (Fragment) OS=Mus musculus OX=10090 GN=Rcn3 PE=1 SV=1;tr|A0A1B0GSK5|A0A1B0GSK5_MOUSE Reticulocalbin-3 (Fragment) OS=Mus musculus OX=10090 GN=Rcn3 PE=1 SV=1;tr|A0A1B0GR19|A0A1B0GR19_MOUSE Reticulocalbin-3 (Fra	5	1	1	1	1	0	1	1	0	0	1	0	1	1	0	0	1	0	1	1	0	0	10.7	10.7	10.7	14.22	122	122;186;274;280;328	3		3				0.0080223	2.0935	By MS/MS		By MS/MS	By MS/MS
A0A1B0GR53;A0A1B0GSF3;A0A1B0GS34;A0A1B0GT05;A0A1B0GR52;O35153	A0A1B0GR53;A0A1B0GSF3;A0A1B0GS34;A0A1B0GT05;A0A1B0GR52;O35153	1;1;1;1;1;1	1;1;1;1;1;1	1;1;1;1;1;1	BET1-like protein	Bet1l	tr|A0A1B0GR53|A0A1B0GR53_MOUSE BET1-like protein (Fragment) OS=Mus musculus OX=10090 GN=Bet1l PE=4 SV=1;tr|A0A1B0GSF3|A0A1B0GSF3_MOUSE BET1-like protein OS=Mus musculus OX=10090 GN=Bet1l PE=4 SV=1;tr|A0A1B0GS34|A0A1B0GS34_MOUSE BET1-like protein OS=Mus mus	6	1	1	1	1	1	1	0	1	0	1	1	1	0	1	0	1	1	1	0	1	0	44.7	44.7	44.7	5.2798	47	47;49;92;94;115;111	5				4		0	19.863	By MS/MS	By MS/MS	By MS/MS		By matching
A0A1B0GR54;O09053	A0A1B0GR54;O09053	1;1	1;1	1;1	Werner syndrome ATP-dependent helicase homolog	Wrn	tr|A0A1B0GR54|A0A1B0GR54_MOUSE Werner syndrome ATP-dependent helicase homolog OS=Mus musculus OX=10090 GN=Wrn PE=1 SV=1;sp|O09053|WRN_MOUSE Werner syndrome ATP-dependent helicase homolog OS=Mus musculus OX=10090 GN=Wrn PE=1 SV=3	2	1	1	1	0	1	0	1	1	0	0	1	0	1	1	0	0	1	0	1	1	0	2.4	2.4	2.4	129.76	1158	1158;1401	5				3		0.0011336	3.1025		By MS/MS		By MS/MS	By MS/MS
A0A1B0GR85;A0A1D5RLN6;Q8BRV5	A0A1B0GR85;A0A1D5RLN6;Q8BRV5	2;1;1	2;1;1	2;1;1	Uncharacterized protein KIAA1671	Kiaa1671	tr|A0A1B0GR85|A0A1B0GR85_MOUSE RIKEN cDNA 2900026A02 gene OS=Mus musculus OX=10090 GN=2900026A02Rik PE=1 SV=1;tr|A0A1D5RLN6|A0A1D5RLN6_MOUSE RIKEN cDNA 2900026A02 gene OS=Mus musculus OX=10090 GN=2900026A02Rik PE=1 SV=1;sp|Q8BRV5|K1671_MOUSE Uncharacterize	3	2	2	2	1	1	1	2	2	1	1	1	1	2	2	1	1	1	1	2	2	1	1.2	1.2	1.2	192.73	1767	1767;385;308	3.3	18	17	18	9	7	0.0023919	2.7836	By MS/MS	By MS/MS	By MS/MS	By MS/MS	By MS/MS	By MS/MS
A0A1B0GRA5;P70302;A0A1B0GR78;A0A1B0GQZ3	A0A1B0GRA5;P70302;A0A1B0GR78	5;5;4;1	5;5;4;1	5;5;4;1	Stromal interaction molecule 1	Stim1	tr|A0A1B0GRA5|A0A1B0GRA5_MOUSE Stromal interaction molecule 1 OS=Mus musculus OX=10090 GN=Stim1 PE=1 SV=1;sp|P70302|STIM1_MOUSE Stromal interaction molecule 1 OS=Mus musculus OX=10090 GN=Stim1 PE=1 SV=2;tr|A0A1B0GR78|A0A1B0GR78_MOUSE Stromal interaction mo	4	5	5	5	4	3	4	3	4	2	4	3	4	3	4	2	4	3	4	3	4	2	8.6	8.6	8.6	88.93	793	793;685;540;207	5.17	1		3	9	11	0	9.8206	By MS/MS	By MS/MS	By MS/MS	By MS/MS	By MS/MS	By MS/MS
A0A1C7CYU6;A0A1B0GRH6;Q3URS2;Q80VJ6;A7KBS4;L7N266;A0A1C7CYV3	A0A1C7CYU6;A0A1B0GRH6;Q3URS2;Q80VJ6;A7KBS4	4;4;4;3;2;1;1	4;4;4;3;2;1;1	2;2;2;1;1;0;0	Zinc finger and SCAN domain containing protein 4F;Zinc finger and SCAN domain containing protein 4C;Zinc finger and SCAN domain containing protein 4D	Zscan4f;Zscan4c;Zscan4d	tr|A0A1C7CYU6|A0A1C7CYU6_MOUSE Zinc finger and SCAN domain containing 4, pseudogene 2 OS=Mus musculus OX=10090 GN=Zscan4-ps2 PE=4 SV=1;tr|A0A1B0GRH6|A0A1B0GRH6_MOUSE Zinc finger and SCAN domain containing 4, pseudogene 3 OS=Mus musculus OX=10090 GN=Zscan4-	7	4	4	2	3	3	3	3	3	2	3	3	3	3	3	2	1	1	1	1	1	0	10.9	10.9	6.1	57.72	506	506;506;506;506;506;77;506	3.79	12	5	7	4	14	0	70.657	By MS/MS	By MS/MS	By MS/MS	By MS/MS	By MS/MS	By MS/MS
A0A1B0GRJ0;E9Q8L9;Q9D620;G3UW57;G3XA57;G3XA57-2	A0A1B0GRJ0;E9Q8L9;Q9D620	11;11;9;1;1;1	11;11;9;1;1;1	11;11;9;1;1;1	Rab11 family-interacting protein 1	Rab11fip1	tr|A0A1B0GRJ0|A0A1B0GRJ0_MOUSE Rab11 family-interacting protein 1 OS=Mus musculus OX=10090 GN=Rab11fip1 PE=1 SV=1;tr|E9Q8L9|E9Q8L9_MOUSE Rab11 family-interacting protein 1 OS=Mus musculus OX=10090 GN=Rab11fip1 PE=1 SV=1;sp|Q9D620|RFIP1_MOUSE Rab11 family-i	6	11	11	11	9	9	8	9	9	7	9	9	8	9	9	7	9	9	8	9	9	7	15.4	15.4	15.4	120.11	1127	1127;1166;645;370;512;529	3.68	19	15	8	23	12	0	101.43	By MS/MS	By MS/MS	By MS/MS	By MS/MS	By MS/MS	By MS/MS
A0A1B0GRP7;Q9Z2Y8;Q6P8V7;A0A1B0GRR5;A0A1B0GSP5;A0A1B0GQY5;Q80ZV3;A0A1B0GSA1	A0A1B0GRP7;Q9Z2Y8;Q6P8V7;A0A1B0GRR5	7;7;5;4;3;3;3;1	7;7;5;4;3;3;3;1	7;7;5;4;3;3;3;1	Proline synthase co-transcribed bacterial homolog protein	Prosc	tr|A0A1B0GRP7|A0A1B0GRP7_MOUSE Pyridoxal phosphate homeostasis protein (Fragment) OS=Mus musculus OX=10090 GN=Plpbp PE=1 SV=1;sp|Q9Z2Y8|PLPHP_MOUSE Pyridoxal phosphate homeostasis protein OS=Mus musculus OX=10090 GN=Plpbp PE=1 SV=1;tr|Q6P8V7|Q6P8V7_MOUSE P	8	7	7	7	6	5	6	6	5	6	6	5	6	6	5	6	6	5	6	6	5	6	25.8	25.8	25.8	36.061	330	330;274;153;137;128;129;141;67	3.38	12	27	13	1	11	0	148.58	By MS/MS	By MS/MS	By MS/MS	By MS/MS	By MS/MS	By MS/MS
A0A1B0GRU8;Q9R1C7-2;Q9R1C7	A0A1B0GRU8;Q9R1C7-2;Q9R1C7	17;17;17	17;17;17	15;15;15	Pre-mRNA-processing factor 40 homolog A	Prpf40a	tr|A0A1B0GRU8|A0A1B0GRU8_MOUSE Pre-mRNA-processing factor 40 homolog A OS=Mus musculus OX=10090 GN=Prpf40a PE=1 SV=1;sp|Q9R1C7-2|PR40A_MOUSE Isoform 2 of Pre-mRNA-processing factor 40 homolog A OS=Mus musculus OX=10090 GN=Prpf40a;sp|Q9R1C7|PR40A_MOUSE Pre-	3	17	17	15	12	13	14	13	11	9	12	13	14	13	11	9	12	12	12	13	10	8	17.4	17.4	15.3	105.53	926	926;911;953	3.96	32	8	31	32	33	0	80.384	By MS/MS	By MS/MS	By MS/MS	By MS/MS	By MS/MS	By MS/MS
A0A1B0GRV0;D3Z5X0	A0A1B0GRV0	10;4	10;4	1;0			tr|A0A1B0GRV0|A0A1B0GRV0_MOUSE 3(2),5-bisphosphate nucleotidase 1 OS=Mus musculus OX=10090 GN=Bpnt1 PE=1 SV=1	2	10	10	1	9	9	10	10	8	8	9	9	10	10	8	8	1	1	1	1	1	1	40.6	40.6	5.6	34.973	323	323;83	4.23	27	1	9	47	31	0	166.23	By MS/MS	By MS/MS	By MS/MS	By MS/MS	By MS/MS	By MS/MS
A0A1B0GRV3;P48377	A0A1B0GRV3;P48377	4;4	4;4	4;4	MHC class II regulatory factor RFX1	Rfx1	tr|A0A1B0GRV3|A0A1B0GRV3_MOUSE MHC class II regulatory factor RFX1 OS=Mus musculus OX=10090 GN=Rfx1 PE=1 SV=1;sp|P48377|RFX1_MOUSE MHC class II regulatory factor RFX1 OS=Mus musculus OX=10090 GN=Rfx1 PE=1 SV=2	2	4	4	4	3	3	3	3	2	4	3	3	3	3	2	4	3	3	3	3	2	4	6.8	6.8	6.8	98.1	910	910;963	3.54	6		11	7		0	15.649	By MS/MS	By MS/MS	By MS/MS	By MS/MS	By MS/MS	By MS/MS
A0A1B0GRW9	A0A1B0GRW9	6	1	1			tr|A0A1B0GRW9|A0A1B0GRW9_MOUSE L-lactate dehydrogenase A chain (Fragment) OS=Mus musculus OX=10090 GN=Ldha PE=1 SV=1	1	6	1	1	4	4	4	4	4	6	0	0	0	0	0	1	0	0	0	0	0	1	72.1	14.4	14.4	11.074	104	104	6					1	0.0005909	3.7032	By matching	By matching	By matching	By matching	By matching	By MS/MS
A0A1B0GS09;Q61187	A0A1B0GS09;Q61187	4;4	4;4	4;4	Tumor susceptibility gene 101 protein	Tsg101	tr|A0A1B0GS09|A0A1B0GS09_MOUSE Tumor susceptibility gene 101 protein (Fragment) OS=Mus musculus OX=10090 GN=Tsg101 PE=1 SV=1;sp|Q61187|TS101_MOUSE Tumor susceptibility gene 101 protein OS=Mus musculus OX=10090 GN=Tsg101 PE=1 SV=2	2	4	4	4	4	2	2	2	2	2	4	2	2	2	2	2	4	2	2	2	2	2	24.1	24.1	24.1	28.857	253	253;391	2.84	4	12	1	2		0	10.294	By MS/MS	By MS/MS	By MS/MS	By MS/MS	By MS/MS	By MS/MS
A0A1B0GS41;Q9QYY0	A0A1B0GS41;Q9QYY0	8;8	8;8	8;8	GRB2-associated-binding protein 1	Gab1	tr|A0A1B0GS41|A0A1B0GS41_MOUSE GRB2-associated-binding protein 1 OS=Mus musculus OX=10090 GN=Gab1 PE=1 SV=1;sp|Q9QYY0|GAB1_MOUSE GRB2-associated-binding protein 1 OS=Mus musculus OX=10090 GN=Gab1 PE=1 SV=2	2	8	8	8	5	5	8	5	5	6	5	5	8	5	5	6	5	5	8	5	5	6	15.7	15.7	15.7	80.184	725	725;695	3.43	9	13	14	6	4	0	30.807	By MS/MS	By MS/MS	By MS/MS	By MS/MS	By MS/MS	By MS/MS
Q8K4L2;E9Q3Z5;A0A1B0GS91;Q8K4L3-3;Q8K4L3;F6R6A4	Q8K4L2;E9Q3Z5;A0A1B0GS91;Q8K4L3-3;Q8K4L3;F6R6A4	7;7;7;7;7;6	7;7;7;7;7;6	7;7;7;7;7;6	Supervillin	Svil	tr|Q8K4L2|Q8K4L2_MOUSE Archvillin OS=Mus musculus OX=10090 GN=Svil PE=1 SV=1;tr|E9Q3Z5|E9Q3Z5_MOUSE Supervillin OS=Mus musculus OX=10090 GN=Svil PE=1 SV=1;tr|A0A1B0GS91|A0A1B0GS91_MOUSE Supervillin OS=Mus musculus OX=10090 GN=Svil PE=1 SV=1;sp|Q8K4L3-3|SVI	6	7	7	7	3	3	4	6	6	3	3	3	4	6	6	3	3	3	4	6	6	3	4.4	4.4	4.4	226.81	2031	2031;2056;2257;1766;2170;749	4.77			12	8	6	0	17.557	By MS/MS	By MS/MS	By MS/MS	By MS/MS	By MS/MS	By MS/MS
A0A1B0GSA2;Q9D3N8-3;Q9D3N8-2;Q9D3N8;Q9D3N8-4	A0A1B0GSA2;Q9D3N8-3;Q9D3N8-2;Q9D3N8;Q9D3N8-4	2;2;2;2;1	2;2;2;2;1	2;2;2;2;1	Growth hormone-regulated TBC protein 1	Grtp1	tr|A0A1B0GSA2|A0A1B0GSA2_MOUSE Growth hormone-regulated TBC protein 1 OS=Mus musculus OX=10090 GN=Grtp1 PE=1 SV=1;sp|Q9D3N8-3|GRTP1_MOUSE Isoform 3 of Growth hormone-regulated TBC protein 1 OS=Mus musculus OX=10090 GN=Grtp1;sp|Q9D3N8-2|GRTP1_MOUSE Isoform	5	2	2	2	2	2	2	2	2	1	2	2	2	2	2	1	2	2	2	2	2	1	7.6	7.6	7.6	32.938	289	289;258;342;359;321	4.53	5				12	0	7.8019	By MS/MS	By MS/MS	By MS/MS	By MS/MS	By MS/MS	By MS/MS
A0A1B0GSA5;Q80Y98;Q80Y98-2;A0A1B0GS27;Q80Y98-3;A0A1B0GSV3	A0A1B0GSA5;Q80Y98;Q80Y98-2;A0A1B0GS27;Q80Y98-3	3;3;3;2;2;1	3;3;3;2;2;1	3;3;3;2;2;1	Phospholipase DDHD2	Ddhd2	tr|A0A1B0GSA5|A0A1B0GSA5_MOUSE Phospholipase DDHD2 OS=Mus musculus OX=10090 GN=Ddhd2 PE=1 SV=1;sp|Q80Y98|DDHD2_MOUSE Phospholipase DDHD2 OS=Mus musculus OX=10090 GN=Ddhd2 PE=1 SV=3;sp|Q80Y98-2|DDHD2_MOUSE Isoform 2 of Phospholipase DDHD2 OS=Mus musculus OX	6	3	3	3	3	3	2	2	3	2	3	3	2	2	3	2	3	3	2	2	3	2	5.9	5.9	5.9	82.112	730	730;699;730;358;566;113	4.89			7	7	5	0	8.1543	By MS/MS	By MS/MS	By MS/MS	By MS/MS	By MS/MS	By MS/MS
A0A1B0GSE5;Z4YJJ5;Q80TQ2-3;Q80TQ2;Q80TQ2-2	A0A1B0GSE5;Z4YJJ5;Q80TQ2-3;Q80TQ2;Q80TQ2-2	2;2;2;2;2	2;2;2;2;2	2;2;2;2;2	Ubiquitin carboxyl-terminal hydrolase CYLD	Cyld	tr|A0A1B0GSE5|A0A1B0GSE5_MOUSE Ubiquitin carboxyl-terminal hydrolase CYLD OS=Mus musculus OX=10090 GN=Cyld PE=1 SV=1;tr|Z4YJJ5|Z4YJJ5_MOUSE Ubiquitin carboxyl-terminal hydrolase CYLD OS=Mus musculus OX=10090 GN=Cyld PE=1 SV=1;sp|Q80TQ2-3|CYLD_MOUSE Isoform	5	2	2	2	0	0	2	0	0	0	0	0	2	0	0	0	0	0	2	0	0	0	3.2	3.2	3.2	87.097	770	770;955;318;952;955	4.5		1			1	0.0006	3.9692			By MS/MS
A0A1B0GSG3;D3Z197;D3Z357;Q6P2L6-4;Q6P2L6-2;Q6P2L6	A0A1B0GSG3;D3Z197;D3Z357;Q6P2L6-4;Q6P2L6-2;Q6P2L6	4;4;4;4;4;4	4;4;4;4;4;4	4;4;4;4;4;4	Histone-lysine N-methyltransferase;Histone-lysine N-methyltransferase NSD3	Whsc1l1	tr|A0A1B0GSG3|A0A1B0GSG3_MOUSE Histone-lysine N-methyltransferase NSD3 OS=Mus musculus OX=10090 GN=Nsd3 PE=1 SV=1;tr|D3Z197|D3Z197_MOUSE Histone-lysine N-methyltransferase OS=Mus musculus OX=10090 GN=Nsd3 PE=1 SV=1;tr|D3Z357|D3Z357_MOUSE Histone-lysine N-m	6	4	4	4	3	2	1	3	2	1	3	2	1	3	2	1	3	2	1	3	2	1	12.5	12.5	12.5	61.409	542	542;1397;1446;621;655;1439	4.67		4		4	4	0	8.6681	By MS/MS	By MS/MS	By MS/MS	By MS/MS	By MS/MS	By MS/MS
A0A1B0GSJ1;Q8BGV4	A0A1B0GSJ1;Q8BGV4	3;3	3;3	3;3	TELO2-interacting protein 2	Tti2	tr|A0A1B0GSJ1|A0A1B0GSJ1_MOUSE TELO2-interacting protein 2 OS=Mus musculus OX=10090 GN=Tti2 PE=1 SV=1;sp|Q8BGV4|TTI2_MOUSE TELO2-interacting protein 2 OS=Mus musculus OX=10090 GN=Tti2 PE=2 SV=1	2	3	3	3	2	3	1	0	2	1	2	3	1	0	2	1	2	3	1	0	2	1	8.9	8.9	8.9	59.694	537	537;512	4.3		3	1	6		0	7.7626	By MS/MS	By MS/MS	By MS/MS		By matching	By MS/MS
A0A1B0GSJ9;Q6P0X2;Q6P0X2-2	A0A1B0GSJ9;Q6P0X2;Q6P0X2-2	1;1;1	1;1;1	1;1;1	Zinc finger protein 511	Znf511	tr|A0A1B0GSJ9|A0A1B0GSJ9_MOUSE Zinc finger protein 511 OS=Mus musculus OX=10090 GN=Zfp511 PE=1 SV=1;sp|Q6P0X2|ZN511_MOUSE Zinc finger protein 511 OS=Mus musculus OX=10090 GN=Znf511 PE=1 SV=2;sp|Q6P0X2-2|ZN511_MOUSE Isoform 2 of Zinc finger protein 511 OS=M	3	1	1	1	1	0	0	0	0	0	1	0	0	0	0	0	1	0	0	0	0	0	25.5	25.5	25.5	11.002	98	98;227;250	5				1		0.0081739	2.0496	By MS/MS
D3Z0B9;A0A1B0GSU0;Q571I9	D3Z0B9;A0A1B0GSU0;Q571I9	3;3;3	3;3;3	3;3;3	Aldehyde dehydrogenase family 16 member A1	Aldh16a1	tr|D3Z0B9|D3Z0B9_MOUSE Aldehyde dehydrogenase family 16 member A1 OS=Mus musculus OX=10090 GN=Aldh16a1 PE=1 SV=3;tr|A0A1B0GSU0|A0A1B0GSU0_MOUSE Aldehyde dehydrogenase family 16 member A1 OS=Mus musculus OX=10090 GN=Aldh16a1 PE=1 SV=1;sp|Q571I9|A16A1_MOUSE	3	3	3	3	3	2	3	3	3	2	3	2	3	3	3	2	3	2	3	3	3	2	4.5	4.5	4.5	79.488	754	754;802;802	3.06	5		11			0.00021053	4.8545	By MS/MS	By MS/MS	By MS/MS	By MS/MS	By MS/MS	By MS/MS
A0A1B0GSV1;Q9D8P4	A0A1B0GSV1;Q9D8P4	2;2	2;2	2;2	39S ribosomal protein L17, mitochondrial	Mrpl17	tr|A0A1B0GSV1|A0A1B0GSV1_MOUSE 39S ribosomal protein L17, mitochondrial (Fragment) OS=Mus musculus OX=10090 GN=Mrpl17 PE=1 SV=1;sp|Q9D8P4|RM17_MOUSE 39S ribosomal protein L17, mitochondrial OS=Mus musculus OX=10090 GN=Mrpl17 PE=1 SV=1	2	2	2	2	1	2	2	1	2	1	1	2	2	1	2	1	1	2	2	1	2	1	13.1	13.1	13.1	13.856	122	122;176	4.62	3		3	1	9	0.000966	3.4282	By MS/MS	By MS/MS	By MS/MS	By MS/MS	By MS/MS	By matching
A0A1B0GSX0;P06151;A0A1B0GSR9;D3YZQ9;A0A1B0GQX5;A0A1B0GT41;A0A1B0GSL7;A0A1B0GS79;A0A1B0GRC1;A0A1B0GRS2;D3YVR7;D3YZE4;P00342;A0A1B0GSR2;A0A1B0GRE9	A0A1B0GSX0;P06151;A0A1B0GSR9;D3YZQ9;A0A1B0GQX5;A0A1B0GT41	26;26;24;19;16;15;12;5;3;3;2;2;2;1;1	26;26;24;19;16;15;12;5;3;3;2;2;2;1;1	19;19;19;12;9;8;6;0;0;0;1;1;1;1;1	L-lactate dehydrogenase A chain;L-lactate dehydrogenase	Ldha	tr|A0A1B0GSX0|A0A1B0GSX0_MOUSE L-lactate dehydrogenase OS=Mus musculus OX=10090 GN=Ldha PE=1 SV=1;sp|P06151|LDHA_MOUSE L-lactate dehydrogenase A chain OS=Mus musculus OX=10090 GN=Ldha PE=1 SV=3;tr|A0A1B0GSR9|A0A1B0GSR9_MOUSE L-lactate dehydrogenase OS=Mus	15	26	26	19	24	22	24	23	21	22	24	22	24	23	21	22	18	16	18	17	15	16	67.9	67.9	51.2	39.758	361	361;332;315;236;201;176;128;205;66;68;235;236;332;171;274	3.57	181	40	80	83	137	0	323.31	By MS/MS	By MS/MS	By MS/MS	By MS/MS	By MS/MS	By MS/MS
A0A1B0GSX7;Q6PFD9;B2RQL0;A0A140T8J8;A0A1B0GRB5;A0A1B0GRA7;A0A1B0GS62	A0A1B0GSX7;Q6PFD9;B2RQL0;A0A140T8J8	37;37;23;23;16;16;2	37;37;23;23;16;16;2	37;37;23;23;16;16;2	Nuclear pore complex protein Nup98-Nup96;Nuclear pore complex protein Nup98;Nuclear pore complex protein Nup96	Nup98	tr|A0A1B0GSX7|A0A1B0GSX7_MOUSE Nuclear pore complex protein Nup98-Nup96 OS=Mus musculus OX=10090 GN=Nup98 PE=1 SV=1;sp|Q6PFD9|NUP98_MOUSE Nuclear pore complex protein Nup98-Nup96 OS=Mus musculus OX=10090 GN=Nup98 PE=1 SV=2;tr|B2RQL0|B2RQL0_MOUSE Nuclear po	7	37	37	37	31	26	29	29	26	25	31	26	29	29	26	25	31	26	29	29	26	25	24.2	24.2	24.2	197.31	1816	1816;1816;1170;1187;967;984;230	3.35	109	44	58	43	61	0	323.31	By MS/MS	By MS/MS	By MS/MS	By MS/MS	By MS/MS	By MS/MS
A0A1B0GSY8;A0A1L1SQ33;Q6NZR2	A0A1B0GSY8;A0A1L1SQ33;Q6NZR2	2;2;2	2;2;2	2;2;2	Myb/SANT-like DNA-binding domain-containing protein 2	Msantd2	tr|A0A1B0GSY8|A0A1B0GSY8_MOUSE Myb/SANT-like DNA-binding domain-containing protein 2 (Fragment) OS=Mus musculus OX=10090 GN=Msantd2 PE=1 SV=1;tr|A0A1L1SQ33|A0A1L1SQ33_MOUSE Myb/SANT-like DNA-binding domain-containing protein 2 (Fragment) OS=Mus musculus OX	3	2	2	2	2	1	1	0	1	1	2	1	1	0	1	1	2	1	1	0	1	1	24.5	24.5	24.5	10.195	94	94;141;559	4.5			3	3		0.00077504	3.4663	By MS/MS	By MS/MS	By MS/MS		By matching	By MS/MS
Q7TMK6;A0A1B0GT78;A0A1B0GSU8	Q7TMK6;A0A1B0GT78;A0A1B0GSU8	3;3;2	3;3;2	3;3;2	Protein Hook homolog 2	Hook2	sp|Q7TMK6|HOOK2_MOUSE Protein Hook homolog 2 OS=Mus musculus OX=10090 GN=Hook2 PE=1 SV=3;tr|A0A1B0GT78|A0A1B0GT78_MOUSE Protein Hook homolog 2 OS=Mus musculus OX=10090 GN=Hook2 PE=1 SV=1;tr|A0A1B0GSU8|A0A1B0GSU8_MOUSE Protein Hook homolog 2 OS=Mus musculus	3	3	3	3	3	2	2	3	2	1	3	2	2	3	2	1	3	2	2	3	2	1	4.9	4.9	4.9	83.365	716	716;692;611	5.79				3	11	0	6.5485	By MS/MS	By MS/MS	By MS/MS	By MS/MS	By MS/MS	By MS/MS
A0A1B0GT81;Q07813;A0A1B0GS13;A0A1B0GTA4;A0A1B0GSH8;A0A1B0GT35	A0A1B0GT81;Q07813;A0A1B0GS13;A0A1B0GTA4;A0A1B0GSH8	5;5;4;4;3;1	5;5;4;4;3;1	5;5;4;4;3;1	Apoptosis regulator BAX	Bax	tr|A0A1B0GT81|A0A1B0GT81_MOUSE Apoptosis regulator BAX OS=Mus musculus OX=10090 GN=Bax PE=1 SV=1;sp|Q07813|BAX_MOUSE Apoptosis regulator BAX OS=Mus musculus OX=10090 GN=Bax PE=1 SV=1;tr|A0A1B0GS13|A0A1B0GS13_MOUSE Apoptosis regulator BAX (Fragment) OS=Mus	6	5	5	5	4	4	4	5	5	4	4	4	4	5	5	4	4	4	4	5	5	4	33.9	33.9	33.9	18.955	171	171;192;114;172;263;74	2.6	20	33	10	2		0	198.16	By MS/MS	By MS/MS	By MS/MS	By MS/MS	By MS/MS	By MS/MS
Q9Z2V5;A0A1B0GX25;B1AUA8	Q9Z2V5;A0A1B0GX25	5;5;1	5;5;1	5;5;1	Histone deacetylase 6	Hdac6	sp|Q9Z2V5|HDAC6_MOUSE Histone deacetylase 6 OS=Mus musculus OX=10090 GN=Hdac6 PE=1 SV=3;tr|A0A1B0GX25|A0A1B0GX25_MOUSE Histone deacetylase 6 (Fragment) OS=Mus musculus OX=10090 GN=Hdac6 PE=1 SV=1	3	5	5	5	4	2	4	3	1	4	4	2	4	3	1	4	4	2	4	3	1	4	5.1	5.1	5.1	125.79	1149	1149;1008;197	4.05		8	6	3	3	0	10.695	By MS/MS	By MS/MS	By MS/MS	By MS/MS	By MS/MS	By MS/MS
A0A1C7CYU3;Q02819;A0A1B0GR41;A0A1B0GR92;A0A1B0GS16;A0A1B0GT83	A0A1C7CYU3;Q02819;A0A1B0GR41;A0A1B0GR92	10;10;7;5;4;2	10;10;7;5;4;2	10;10;7;5;4;2	Nucleobindin-1	Nucb1	tr|A0A1C7CYU3|A0A1C7CYU3_MOUSE Nucleobindin 1, isoform CRA_b OS=Mus musculus OX=10090 GN=Nucb1 PE=1 SV=1;sp|Q02819|NUCB1_MOUSE Nucleobindin-1 OS=Mus musculus OX=10090 GN=Nucb1 PE=1 SV=2;tr|A0A1B0GR41|A0A1B0GR41_MOUSE Nucleobindin-1 (Fragment) OS=Mus muscul	6	10	10	10	6	8	4	6	5	6	6	8	4	6	5	6	6	8	4	6	5	6	29.5	29.5	29.5	52.997	455	455;459;271;220;170;121	3.6	17	12	4	15	12	0	38.069	By MS/MS	By MS/MS	By MS/MS	By MS/MS	By MS/MS	By MS/MS
A0A1C7CYU5;Q3U2I3-3;Q3U2I3;Q3U2I3-2;F8WHJ1	A0A1C7CYU5;Q3U2I3-3;Q3U2I3;Q3U2I3-2;F8WHJ1	4;4;4;3;2	4;4;4;3;2	4;4;4;3;2	FTS and Hook-interacting protein	Fam160a2	tr|A0A1C7CYU5|A0A1C7CYU5_MOUSE FTS and Hook-interacting protein OS=Mus musculus OX=10090 GN=Fam160a2 PE=1 SV=1;sp|Q3U2I3-3|F16A2_MOUSE Isoform 3 of FTS and Hook-interacting protein OS=Mus musculus OX=10090 GN=Fam160a2;sp|Q3U2I3|F16A2_MOUSE FTS and Hook-int	5	4	4	4	1	2	3	2	3	2	1	2	3	2	3	2	1	2	3	2	3	2	4.9	4.9	4.9	108.02	989	989;791;975;909;909	5.69			2		11	0	7.4229	By MS/MS	By MS/MS	By MS/MS	By MS/MS	By MS/MS	By MS/MS
A0A1C7CYV0;B1AX58;Q99K51	A0A1C7CYV0;B1AX58;Q99K51	19;19;19	19;19;19	14;14;14	Plastin-3	Pls3	tr|A0A1C7CYV0|A0A1C7CYV0_MOUSE Plastin-3 (Fragment) OS=Mus musculus OX=10090 GN=Pls3 PE=1 SV=1;tr|B1AX58|B1AX58_MOUSE Plastin-3 OS=Mus musculus OX=10090 GN=Pls3 PE=1 SV=1;sp|Q99K51|PLST_MOUSE Plastin-3 OS=Mus musculus OX=10090 GN=Pls3 PE=1 SV=3	3	19	19	14	18	15	15	19	18	17	18	15	15	19	18	17	13	10	11	14	13	12	38.8	38.8	31.8	70.642	629	629;639;630	3.45	58	44	46	42	28	0	196.99	By MS/MS	By MS/MS	By MS/MS	By MS/MS	By MS/MS	By MS/MS
G5E8I8;A0A1D5RL92;Q8CGZ0	G5E8I8;A0A1D5RL92;Q8CGZ0	13;13;13	13;13;13	13;13;13	Calcium homeostasis endoplasmic reticulum protein	Cherp	tr|G5E8I8|G5E8I8_MOUSE Calcium homeostasis endoplasmic reticulum protein OS=Mus musculus OX=10090 GN=Cherp PE=1 SV=2;tr|A0A1D5RL92|A0A1D5RL92_MOUSE Calcium homeostasis endoplasmic reticulum protein OS=Mus musculus OX=10090 GN=Cherp PE=1 SV=1;sp|Q8CGZ0|CHER	3	13	13	13	13	11	12	11	10	10	13	11	12	11	10	10	13	11	12	11	10	10	15.2	15.2	15.2	107.67	949	949;938;936	4.04	40	7	13	37	48	0	152.05	By MS/MS	By MS/MS	By MS/MS	By MS/MS	By MS/MS	By MS/MS
A0A1D5RLJ8;Q8C0M0-2;Q8C0M0;Q8C0M0-3	A0A1D5RLJ8;Q8C0M0-2;Q8C0M0;Q8C0M0-3	1;1;1;1	1;1;1;1	1;1;1;1	WD repeat-containing protein 59	Wdr59	tr|A0A1D5RLJ8|A0A1D5RLJ8_MOUSE GATOR complex protein WDR59 OS=Mus musculus OX=10090 GN=Wdr59 PE=1 SV=1;sp|Q8C0M0-2|WDR59_MOUSE Isoform 2 of GATOR complex protein WDR59 OS=Mus musculus OX=10090 GN=Wdr59;sp|Q8C0M0|WDR59_MOUSE GATOR complex protein WDR59 OS=M	4	1	1	1	0	1	1	1	1	0	0	1	1	1	1	0	0	1	1	1	1	0	1.1	1.1	1.1	111.65	991	991;974;992;993	4			4			0.0028996	2.6087		By MS/MS	By MS/MS	By MS/MS	By MS/MS
A0A1D5RLL3;Q8BG67;Q8BG67-2;A0A2I3BR57;Q8BWC5	A0A1D5RLL3;Q8BG67;Q8BG67-2	6;6;6;1;1	6;6;6;1;1	6;6;6;1;1	Protein EFR3 homolog A	Efr3a	tr|A0A1D5RLL3|A0A1D5RLL3_MOUSE Protein EFR3 homolog A OS=Mus musculus OX=10090 GN=Efr3a PE=1 SV=1;sp|Q8BG67|EFR3A_MOUSE Protein EFR3 homolog A OS=Mus musculus OX=10090 GN=Efr3a PE=1 SV=1;sp|Q8BG67-2|EFR3A_MOUSE Isoform 2 of Protein EFR3 homolog A OS=Mus mu	5	6	6	6	5	2	2	3	3	4	5	2	2	3	3	4	5	2	2	3	3	4	7.8	7.8	7.8	95.684	846	846;819;821;112;174	4.79			11	1	7	0	12.977	By MS/MS	By MS/MS	By MS/MS	By MS/MS	By MS/MS	By MS/MS
E9PZA7;E9QLK7;E9PWT1;A0A1D5RLL4;F7CGG2;Q80YV3;D3YY11	E9PZA7;E9QLK7;E9PWT1;A0A1D5RLL4;F7CGG2;Q80YV3	17;17;17;17;16;12;1	17;17;17;17;16;12;1	17;17;17;17;16;12;1	Transformation/transcription domain-associated protein	Trrap	tr|E9PZA7|E9PZA7_MOUSE Transformation/transcription domain-associated protein OS=Mus musculus OX=10090 GN=Trrap PE=1 SV=1;tr|E9QLK7|E9QLK7_MOUSE Transformation/transcription domain-associated protein OS=Mus musculus OX=10090 GN=Trrap PE=1 SV=1;tr|E9PWT1|E9	7	17	17	17	11	7	9	9	9	9	11	7	9	9	9	9	11	7	9	9	9	9	5.2	5.2	5.2	434.04	3829	3829;3847;3858;3859;3587;2565;58	4.96		7	13	9	25	0	55.408	By MS/MS	By MS/MS	By MS/MS	By MS/MS	By MS/MS	By MS/MS
A0A1D5RLM0;E9PWU7;O35231-2;O35231	A0A1D5RLM0;E9PWU7;O35231-2;O35231	2;2;2;2	1;1;1;1	1;1;1;1	Kinesin-like protein;Kinesin-like protein KIFC3	Kifc3	tr|A0A1D5RLM0|A0A1D5RLM0_MOUSE Kinesin-like protein OS=Mus musculus OX=10090 GN=Kifc3 PE=1 SV=1;tr|E9PWU7|E9PWU7_MOUSE Kinesin-like protein OS=Mus musculus OX=10090 GN=Kifc3 PE=1 SV=1;sp|O35231-2|KIFC3_MOUSE Isoform 2 of Kinesin-like protein KIFC3 OS=Mus m	4	2	1	1	2	1	1	1	2	2	1	0	0	0	1	1	1	0	0	0	1	1	3.3	1.7	1.7	77.44	687	687;778;709;824	6					3	0	8.7651	By matching	By matching	By matching	By matching	By MS/MS	By MS/MS
A0A1D5RLN1;A0A1D5RM75;Q3UMM4	A0A1D5RLN1;A0A1D5RM75;Q3UMM4	1;1;1	1;1;1	1;1;1	Cyclin-dependent kinase 10	Cdk10	tr|A0A1D5RLN1|A0A1D5RLN1_MOUSE Cyclin-dependent kinase 10 OS=Mus musculus OX=10090 GN=Cdk10 PE=1 SV=1;tr|A0A1D5RM75|A0A1D5RM75_MOUSE Cyclin-dependent kinase 10 OS=Mus musculus OX=10090 GN=Cdk10 PE=1 SV=1;sp|Q3UMM4|CDK10_MOUSE Cyclin-dependent kinase 10 OS=	3	1	1	1	1	1	1	1	1	1	1	1	1	1	1	1	1	1	1	1	1	1	10.1	10.1	10.1	14.885	129	129;140;360	3		6				0.0009573	3.3049	By MS/MS	By MS/MS	By MS/MS	By MS/MS	By MS/MS	By MS/MS
A0A1D5RLW0;A0A1D5RLU2;Q91WE2;A0A1D5RLF2;A0A1D5RLI3;A0A1D5RLY1;A0A1D5RLX7;A0A1D5RM30;A0A1D5RLD7;A0A1D5RLT4;A0A1D5RLJ3;A0A1D5RM67	A0A1D5RLW0;A0A1D5RLU2;Q91WE2;A0A1D5RLF2;A0A1D5RLI3;A0A1D5RLY1;A0A1D5RLX7	5;5;5;4;4;4;4;2;2;2;2;1	5;5;5;4;4;4;4;2;2;2;2;1	5;5;5;4;4;4;4;2;2;2;2;1	Protein FAM192A	Fam192a	tr|A0A1D5RLW0|A0A1D5RLW0_MOUSE PSME3-interacting protein (Fragment) OS=Mus musculus OX=10090 GN=Fam192a PE=1 SV=1;tr|A0A1D5RLU2|A0A1D5RLU2_MOUSE PSME3-interacting protein (Fragment) OS=Mus musculus OX=10090 GN=Fam192a PE=1 SV=1;sp|Q91WE2|PIP30_MOUSE PSME3-	12	5	5	5	5	4	5	4	5	4	5	4	5	4	5	4	5	4	5	4	5	4	26.6	26.6	26.6	20.66	173	173;194;254;110;113;129;143;36;83;86;90;62	3.23	12	18	4	8	5	0	20.995	By MS/MS	By MS/MS	By MS/MS	By MS/MS	By MS/MS	By MS/MS
A0A1D5RMB4;A0A1D5RLV0;Q8C1D8	A0A1D5RMB4;A0A1D5RLV0;Q8C1D8	6;6;6	6;6;6	6;6;6	Protein IWS1 homolog	Iws1	tr|A0A1D5RMB4|A0A1D5RMB4_MOUSE Protein IWS1 homolog (Fragment) OS=Mus musculus OX=10090 GN=Iws1 PE=1 SV=1;tr|A0A1D5RLV0|A0A1D5RLV0_MOUSE Protein IWS1 homolog OS=Mus musculus OX=10090 GN=Iws1 PE=1 SV=1;sp|Q8C1D8|IWS1_MOUSE Protein IWS1 homolog OS=Mus muscul	3	6	6	6	5	4	6	5	6	4	5	4	6	5	6	4	5	4	6	5	6	4	33.3	33.3	33.3	22.57	198	198;765;766	2.96	20	1	12	10	2	0	20.024	By MS/MS	By MS/MS	By MS/MS	By MS/MS	By MS/MS	By MS/MS
A0A1D5RLX9;Q8BWH0	A0A1D5RLX9;Q8BWH0	1;1	1;1	1;1	Putative sodium-coupled neutral amino acid transporter 7	Slc38a7	tr|A0A1D5RLX9|A0A1D5RLX9_MOUSE Putative sodium-coupled neutral amino acid transporter 7 (Fragment) OS=Mus musculus OX=10090 GN=Slc38a7 PE=1 SV=1;sp|Q8BWH0|S38A7_MOUSE Putative sodium-coupled neutral amino acid transporter 7 OS=Mus musculus OX=10090 GN=Slc3	2	1	1	1	1	1	1	1	1	1	1	1	1	1	1	1	1	1	1	1	1	1	2.9	2.9	2.9	44.086	409	409;463	4			6			0.00095932	3.3265	By MS/MS	By MS/MS	By MS/MS	By MS/MS	By MS/MS	By MS/MS
A0A1D5RLY9;Q80TE4-2;Q80TE4	A0A1D5RLY9;Q80TE4-2;Q80TE4	3;3;3	3;3;3	3;3;3	Signal-induced proliferation-associated 1-like protein 2	Sipa1l2	tr|A0A1D5RLY9|A0A1D5RLY9_MOUSE Signal-induced proliferation-associated 1-like protein 2 OS=Mus musculus OX=10090 GN=Sipa1l2 PE=1 SV=1;sp|Q80TE4-2|SI1L2_MOUSE Isoform 2 of Signal-induced proliferation-associated 1-like protein 2 OS=Mus musculus OX=10090 GN=	3	3	3	3	1	2	1	2	1	2	1	2	1	2	1	2	1	2	1	2	1	2	2.1	2.1	2.1	187.46	1704	1704;1703;1722	6					9	0.00060084	3.9866	By MS/MS	By MS/MS	By MS/MS	By MS/MS	By MS/MS	By MS/MS
A0A1D5RLZ6;Q9DCC8	A0A1D5RLZ6;Q9DCC8	2;2	2;2	2;2	Mitochondrial import receptor subunit TOM20 homolog	Tomm20	tr|A0A1D5RLZ6|A0A1D5RLZ6_MOUSE Mitochondrial import receptor subunit TOM20 homolog OS=Mus musculus OX=10090 GN=Tomm20 PE=1 SV=1;sp|Q9DCC8|TOM20_MOUSE Mitochondrial import receptor subunit TOM20 homolog OS=Mus musculus OX=10090 GN=Tomm20 PE=1 SV=1	2	2	2	2	2	1	2	2	2	2	2	1	2	2	2	2	2	1	2	2	2	2	19.6	19.6	19.6	11.434	102	102;145	2.42	10	6			3	0	19.417	By MS/MS	By MS/MS	By MS/MS	By MS/MS	By MS/MS	By MS/MS
A0A1D5RMA4;A0A1D5RMI7;A0A1D5RM43;Q8BGK6	A0A1D5RMA4;A0A1D5RMI7;A0A1D5RM43;Q8BGK6	1;1;1;1	1;1;1;1	1;1;1;1	Y+L amino acid transporter 2	Slc7a6	tr|A0A1D5RMA4|A0A1D5RMA4_MOUSE Y+L amino acid transporter 2 OS=Mus musculus OX=10090 GN=Slc7a6 PE=1 SV=1;tr|A0A1D5RMI7|A0A1D5RMI7_MOUSE Y+L amino acid transporter 2 (Fragment) OS=Mus musculus OX=10090 GN=Slc7a6 PE=1 SV=1;tr|A0A1D5RM43|A0A1D5RM43_MOUSE Y+L	4	1	1	1	1	1	1	1	1	1	1	1	1	1	1	1	1	1	1	1	1	1	27.3	27.3	27.3	6.9868	66	66;174;232;515	3.94	2		9	5		0	32.749	By MS/MS	By MS/MS	By MS/MS	By MS/MS	By MS/MS	By MS/MS
A0A1D5RM85;P62717;A0A1D5RLW5;A0A1D5RME4;A0A1D5RM79;A0A1D5RMC7	A0A1D5RM85;P62717;A0A1D5RLW5;A0A1D5RME4;A0A1D5RM79	15;15;13;10;9;5	15;15;13;10;9;5	15;15;13;10;9;5	60S ribosomal protein L18a	Rpl18a	tr|A0A1D5RM85|A0A1D5RM85_MOUSE 60S ribosomal protein L18a (Fragment) OS=Mus musculus OX=10090 GN=Rpl18a PE=1 SV=1;sp|P62717|RL18A_MOUSE 60S ribosomal protein L18a OS=Mus musculus OX=10090 GN=Rpl18a PE=1 SV=1;tr|A0A1D5RLW5|A0A1D5RLW5_MOUSE 60S ribosomal pro	6	15	15	15	14	12	15	14	12	13	14	12	15	14	12	13	14	12	15	14	12	13	47	47	47	24.638	219	219;176;147;123;109;70	3.14	106	21	27	27	55	0	109.02	By MS/MS	By MS/MS	By MS/MS	By MS/MS	By MS/MS	By MS/MS
A0A1D5RM90;B2ZAC8;Q8R3L2-4;Q8R3L2-3;Q8R3L2-2;Q8R3L2-5;Q8R3L2	A0A1D5RM90;B2ZAC8;Q8R3L2-4;Q8R3L2-3;Q8R3L2-2;Q8R3L2-5;Q8R3L2	3;3;3;3;3;3;3	3;3;3;3;3;3;3	3;3;3;3;3;3;3	Transcription factor 25	Tcf25	tr|A0A1D5RM90|A0A1D5RM90_MOUSE Transcription factor 25 OS=Mus musculus OX=10090 GN=Tcf25 PE=1 SV=1;tr|B2ZAC8|B2ZAC8_MOUSE Nuclear localized protein-1 isoform d (Fragment) OS=Mus musculus OX=10090 GN=Tcf25 PE=1 SV=1;sp|Q8R3L2-4|TCF25_MOUSE Isoform 4 of Tran	7	3	3	3	2	0	3	1	1	1	2	0	3	1	1	1	2	0	3	1	1	1	4	4	4	71.035	626	626;651;600;611;625;626;676	5.62				3	5	0.00096283	3.3749	By MS/MS		By MS/MS	By MS/MS	By MS/MS	By MS/MS
A0A1D5RMA5;Q9D385-2;Q9D385	A0A1D5RMA5;Q9D385-2;Q9D385	1;1;1	1;1;1	1;1;1	ADP-ribosylation factor-like protein 2-binding protein	Arl2bp	tr|A0A1D5RMA5|A0A1D5RMA5_MOUSE ADP-ribosylation factor-like protein 2-binding protein OS=Mus musculus OX=10090 GN=Arl2bp PE=1 SV=1;sp|Q9D385-2|AR2BP_MOUSE Isoform 2 of ADP-ribosylation factor-like protein 2-binding protein OS=Mus musculus OX=10090 GN=Arl2b	3	1	1	1	1	1	1	1	0	1	1	1	1	1	0	1	1	1	1	1	0	1	13.2	13.2	13.2	10.778	91	91;152;163	3		5				0.0028954	2.5943	By matching	By MS/MS	By MS/MS	By MS/MS		By matching
A0A1D5RMC1;Q6PDL0;A0A1D5RM94	A0A1D5RMC1;Q6PDL0;A0A1D5RM94	5;5;4	4;4;3	4;4;3	Cytoplasmic dynein 1 light intermediate chain 2	Dync1li2	tr|A0A1D5RMC1|A0A1D5RMC1_MOUSE Cytoplasmic dynein 1 light intermediate chain 2 (Fragment) OS=Mus musculus OX=10090 GN=Dync1li2 PE=1 SV=1;sp|Q6PDL0|DC1L2_MOUSE Cytoplasmic dynein 1 light intermediate chain 2 OS=Mus musculus OX=10090 GN=Dync1li2 PE=1 SV=2;tr	3	5	4	4	4	4	4	5	3	0	3	3	3	4	2	0	3	3	3	4	2	0	14.3	11.1	11.1	45.24	406	406;492;470	3.6	3	5	6	6		0	6.6859	By MS/MS	By MS/MS	By MS/MS	By MS/MS	By MS/MS
A0A1D5RMI8;Q8K4E0	A0A1D5RMI8;Q8K4E0	6;3	6;3	6;3	Alstrom syndrome protein 1 homolog	Alms1	tr|A0A1D5RMI8|A0A1D5RMI8_MOUSE Alstrom syndrome protein 1 homolog OS=Mus musculus OX=10090 GN=Alms1 PE=1 SV=1;sp|Q8K4E0|ALMS1_MOUSE Alstrom syndrome protein 1 homolog OS=Mus musculus OX=10090 GN=Alms1 PE=1 SV=2	2	6	6	6	4	2	1	5	2	1	4	2	1	5	2	1	4	2	1	5	2	1	2.3	2.3	2.3	412.58	3720	3720;3251	3.93		9		4	2	0	11.194	By MS/MS	By MS/MS	By MS/MS	By MS/MS	By MS/MS	By matching
F8VQ28;A0A1D5RMM8;Q8VI36-2;Q8VI36;A0A0J9YV30	F8VQ28;A0A1D5RMM8;Q8VI36-2;Q8VI36;A0A0J9YV30	3;3;3;3;2	3;3;3;3;2	3;3;3;3;2	Paxillin	Pxn	tr|F8VQ28|F8VQ28_MOUSE Paxillin OS=Mus musculus OX=10090 GN=Pxn PE=1 SV=1;tr|A0A1D5RMM8|A0A1D5RMM8_MOUSE Paxillin OS=Mus musculus OX=10090 GN=Pxn PE=1 SV=2;sp|Q8VI36-2|PAXI_MOUSE Isoform Alpha of Paxillin OS=Mus musculus OX=10090 GN=Pxn;sp|Q8VI36|PAXI_MOUS	5	3	3	3	3	2	2	3	2	1	3	2	2	3	2	1	3	2	2	3	2	1	7.6	7.6	7.6	64.506	591	591;1062;557;591;424	5			5	6	5	0	144.65	By MS/MS	By MS/MS	By MS/MS	By MS/MS	By MS/MS	By MS/MS
A0A1I7Q4A6;Q9CPQ5	A0A1I7Q4A6;Q9CPQ5	3;3	3;3	3;3	Centromere protein Q	Cenpq	tr|A0A1I7Q4A6|A0A1I7Q4A6_MOUSE Centromere protein Q OS=Mus musculus OX=10090 GN=Cenpq PE=1 SV=1;sp|Q9CPQ5|CENPQ_MOUSE Centromere protein Q OS=Mus musculus OX=10090 GN=Cenpq PE=2 SV=2	2	3	3	3	1	1	1	2	2	0	1	1	1	2	2	0	1	1	1	2	2	0	14.1	14.1	14.1	30.76	269	269;267	4.5			4	4		0	22.043	By MS/MS	By MS/MS	By MS/MS	By MS/MS	By MS/MS
A0A1L1SQ41;A0A140LJ98;J3QNU1;Q4FCQ7;Q9Z2A5-2;Q9Z2A5	A0A1L1SQ41;A0A140LJ98;J3QNU1;Q4FCQ7;Q9Z2A5-2;Q9Z2A5	5;4;4;4;4;4	5;4;4;4;4;4	5;4;4;4;4;4	Arginyl-tRNA--protein transferase 1	Ate1	tr|A0A1L1SQ41|A0A1L1SQ41_MOUSE Arginyl-tRNA--protein transferase 1 OS=Mus musculus OX=10090 GN=Ate1 PE=1 SV=1;tr|A0A140LJ98|A0A140LJ98_MOUSE Arginyl-tRNA--protein transferase 1 (Fragment) OS=Mus musculus OX=10090 GN=Ate1 PE=1 SV=1;tr|J3QNU1|J3QNU1_MOUSE Ar	6	5	5	5	5	4	5	5	4	3	5	4	5	5	4	3	5	4	5	5	4	3	12.2	12.2	12.2	64.094	559	559;242;509;509;516;516	4.56	1		11	12	3	0	11.812	By MS/MS	By MS/MS	By MS/MS	By MS/MS	By MS/MS	By MS/MS
E9PUM4;A0A1L1SQ51;Q71LX4;Q8CDM9;A0A1L1SRI1;A0A1L1SQP9	E9PUM4;A0A1L1SQ51;Q71LX4;Q8CDM9;A0A1L1SRI1;A0A1L1SQP9	31;31;31;23;23;16	23;23;23;16;16;11	23;23;23;16;16;11	Talin-2	Tln2	tr|E9PUM4|E9PUM4_MOUSE Talin-2 OS=Mus musculus OX=10090 GN=Tln2 PE=1 SV=1;tr|A0A1L1SQ51|A0A1L1SQ51_MOUSE Talin-2 OS=Mus musculus OX=10090 GN=Tln2 PE=1 SV=1;sp|Q71LX4|TLN2_MOUSE Talin-2 OS=Mus musculus OX=10090 GN=Tln2 PE=1 SV=3;tr|Q8CDM9|Q8CDM9_MOUSE Talin	6	31	23	23	21	20	16	17	18	19	15	14	9	11	12	12	15	14	9	11	12	12	17.5	13.8	13.8	271.66	2542	2542;2544;2375;1452;1471;923	4.56	3	12	21	21	22	0	83.395	By MS/MS	By MS/MS	By MS/MS	By MS/MS	By MS/MS	By MS/MS
A0A1L1SQA8;P62852	A0A1L1SQA8;P62852	4;4	4;4	4;4	40S ribosomal protein S25	Rps25	tr|A0A1L1SQA8|A0A1L1SQA8_MOUSE 40S ribosomal protein S25 OS=Mus musculus OX=10090 GN=Rps25 PE=1 SV=1;sp|P62852|RS25_MOUSE 40S ribosomal protein S25 OS=Mus musculus OX=10090 GN=Rps25 PE=1 SV=1	2	4	4	4	4	4	4	4	4	4	4	4	4	4	4	4	4	4	4	4	4	4	32.3	32.3	32.3	10.309	93	93;125	4.2	31	4	11	56	34	0	38.087	By MS/MS	By MS/MS	By MS/MS	By MS/MS	By MS/MS	By MS/MS
A0A1L1SQR4;Q8VDR9;A0A1L1ST98;A0A1L1STJ1;Q8VDR9-2	A0A1L1SQR4;Q8VDR9	5;5;2;1;1	3;3;1;1;1	3;3;1;1;1	Dedicator of cytokinesis protein 6	Dock6	tr|A0A1L1SQR4|A0A1L1SQR4_MOUSE Dedicator of cytokinesis protein 6 OS=Mus musculus OX=10090 GN=Dock6 PE=1 SV=1;sp|Q8VDR9|DOCK6_MOUSE Dedicator of cytokinesis protein 6 OS=Mus musculus OX=10090 GN=Dock6 PE=1 SV=4	5	5	3	3	4	3	3	4	4	3	2	2	2	2	2	2	2	2	2	2	2	2	2.6	1.5	1.5	236.56	2111	2111;2080;577;477;1027	4.18	4		4	3	6	0.00040967	4.4197	By MS/MS	By MS/MS	By MS/MS	By MS/MS	By MS/MS	By MS/MS
A0A1L1SQS5;Q80XP8-2;Q80XP8	A0A1L1SQS5;Q80XP8-2;Q80XP8	2;2;2	2;2;2	2;2;2	Protein FAM76B	Fam76b	tr|A0A1L1SQS5|A0A1L1SQS5_MOUSE Protein FAM76B (Fragment) OS=Mus musculus OX=10090 GN=Fam76b PE=1 SV=1;sp|Q80XP8-2|FA76B_MOUSE Isoform 2 of Protein FAM76B OS=Mus musculus OX=10090 GN=Fam76b;sp|Q80XP8|FA76B_MOUSE Protein FAM76B OS=Mus musculus OX=10090 GN=Fa	3	2	2	2	1	2	1	1	2	2	1	2	1	1	2	2	1	2	1	1	2	2	17.6	17.6	17.6	8.6919	74	74;111;339	4.56			4	5		0.00040816	4.3478	By MS/MS	By MS/MS	By MS/MS	By MS/MS	By MS/MS	By MS/MS
Q3V2G6;A0A1L1SR11;A0A1L1ST53;B2RUC1;O54818	Q3V2G6;A0A1L1SR11;A0A1L1ST53;B2RUC1;O54818	2;2;2;2;2	2;2;2;2;2	2;2;2;2;2	Tumor protein D53	Tpd52l1	tr|Q3V2G6|Q3V2G6_MOUSE Tumor protein D52-like 1, isoform CRA_a OS=Mus musculus OX=10090 GN=Tpd52l1 PE=1 SV=1;tr|A0A1L1SR11|A0A1L1SR11_MOUSE Tumor protein D53 OS=Mus musculus OX=10090 GN=Tpd52l1 PE=1 SV=1;tr|A0A1L1ST53|A0A1L1ST53_MOUSE Tumor protein D53 OS=	5	2	2	2	2	2	2	2	2	2	2	2	2	2	2	2	2	2	2	2	2	2	18.3	18.3	18.3	14.752	131	131;144;191;209;204	4.19	5		6	1	9	0	16.688	By MS/MS	By MS/MS	By MS/MS	By MS/MS	By MS/MS	By MS/MS
A0A1L1SR14;A0A1L1SS60;Q8BH79-2;Q8BH79-3;Q8BH79;Q8BH79-4	A0A1L1SR14;A0A1L1SS60;Q8BH79-2;Q8BH79-3;Q8BH79;Q8BH79-4	1;1;1;1;1;1	1;1;1;1;1;1	1;1;1;1;1;1	Anoctamin-10	Ano10	tr|A0A1L1SR14|A0A1L1SR14_MOUSE Anoctamin-10 OS=Mus musculus OX=10090 GN=Ano10 PE=1 SV=1;tr|A0A1L1SS60|A0A1L1SS60_MOUSE Anoctamin OS=Mus musculus OX=10090 GN=Ano10 PE=1 SV=1;sp|Q8BH79-2|ANO10_MOUSE Isoform 2 of Anoctamin-10 OS=Mus musculus OX=10090 GN=Ano10	6	1	1	1	0	1	0	0	0	0	0	1	0	0	0	0	0	1	0	0	0	0	9.7	9.7	9.7	19.808	176	176;498;601;612;659;670	4			1			0.0030565	2.5172		By MS/MS
A0A1L1SR69;A0A1L1ST61;A0A1L1SV00;Q8R472;Q9JLR9	A0A1L1SR69;A0A1L1ST61;A0A1L1SV00;Q8R472;Q9JLR9	1;1;1;1;1	1;1;1;1;1	1;1;1;1;1	HIG1 domain family member 1A, mitochondrial	Higd1a	tr|A0A1L1SR69|A0A1L1SR69_MOUSE HIG1 domain family member 1A, mitochondrial (Fragment) OS=Mus musculus OX=10090 GN=Higd1a PE=1 SV=1;tr|A0A1L1ST61|A0A1L1ST61_MOUSE HIG1 domain family member 1A, mitochondrial (Fragment) OS=Mus musculus OX=10090 GN=Higd1a PE=1	5	1	1	1	1	1	1	1	1	1	1	1	1	1	1	1	1	1	1	1	1	1	28.6	28.6	28.6	6.91	63	63;76;84;99;95	3		6				0	24.173	By MS/MS	By MS/MS	By MS/MS	By MS/MS	By MS/MS	By MS/MS
Q9CQT2;A0A1L1SRC3;A0A1L1SUJ3	Q9CQT2;A0A1L1SRC3	5;5;1	5;5;1	5;5;1	RNA-binding protein 7	Rbm7	sp|Q9CQT2|RBM7_MOUSE RNA-binding protein 7 OS=Mus musculus OX=10090 GN=Rbm7 PE=1 SV=1;tr|A0A1L1SRC3|A0A1L1SRC3_MOUSE RNA-binding protein 7 OS=Mus musculus OX=10090 GN=Rbm7 PE=1 SV=1	3	5	5	5	5	4	5	4	5	4	5	4	5	4	5	4	5	4	5	4	5	4	25.3	25.3	25.3	30.148	265	265;158;39	3.49	15		22	4	8	0	40.292	By MS/MS	By MS/MS	By MS/MS	By MS/MS	By MS/MS	By MS/MS
A0A1L1SRN0;Q9R1Z7	A0A1L1SRN0;Q9R1Z7	2;2	2;2	2;2	6-pyruvoyl tetrahydrobiopterin synthase	Pts	tr|A0A1L1SRN0|A0A1L1SRN0_MOUSE 6-pyruvoyl tetrahydrobiopterin synthase OS=Mus musculus OX=10090 GN=Pts PE=1 SV=1;sp|Q9R1Z7|PTPS_MOUSE 6-pyruvoyl tetrahydrobiopterin synthase OS=Mus musculus OX=10090 GN=Pts PE=1 SV=2	2	2	2	2	1	0	1	0	1	0	1	0	1	0	1	0	1	0	1	0	1	0	27.3	27.3	27.3	8.8551	77	77;144	5.33			1		2	0.0022161	2.8116	By MS/MS		By MS/MS		By MS/MS
F6TCF9;A0A1L1SRT0;Q60739-2;Q60739	F6TCF9;A0A1L1SRT0;Q60739-2;Q60739	7;7;7;7	7;7;7;7	7;7;7;7	BAG family molecular chaperone regulator 1	Bag1	tr|F6TCF9|F6TCF9_MOUSE BAG family molecular chaperone regulator 1 OS=Mus musculus OX=10090 GN=Bag1 PE=1 SV=1;tr|A0A1L1SRT0|A0A1L1SRT0_MOUSE BAG family molecular chaperone regulator 1 OS=Mus musculus OX=10090 GN=Bag1 PE=1 SV=1;sp|Q60739-2|BAG1_MOUSE Isoform	4	7	7	7	7	4	7	5	6	5	7	4	7	5	6	5	7	4	7	5	6	5	22	22	22	39.696	355	355;355;219;355	3.55	7	11	18	4	4	0	48.586	By MS/MS	By MS/MS	By MS/MS	By MS/MS	By MS/MS	By MS/MS
A0A1L1SRW2;A0A1L1STF2;A0A1L1SRT5;Q91W67;A0A1L1SRT4;A0A1L1SRB5;A0A1L1SU68	A0A1L1SRW2;A0A1L1STF2;A0A1L1SRT5;Q91W67;A0A1L1SRT4;A0A1L1SRB5;A0A1L1SU68	4;4;4;4;3;3;3	4;4;4;4;3;3;3	4;4;4;4;3;3;3	Ubiquitin-like protein 7	Ubl7	tr|A0A1L1SRW2|A0A1L1SRW2_MOUSE Ubiquitin-like protein 7 (Fragment) OS=Mus musculus OX=10090 GN=Ubl7 PE=1 SV=1;tr|A0A1L1STF2|A0A1L1STF2_MOUSE Ubiquitin-like protein 7 (Fragment) OS=Mus musculus OX=10090 GN=Ubl7 PE=1 SV=1;tr|A0A1L1SRT5|A0A1L1SRT5_MOUSE Ubiqu	7	4	4	4	4	2	3	4	4	3	4	2	3	4	4	3	4	2	3	4	4	3	40.3	40.3	40.3	14.458	129	129;157;238;380;70;110;202	3.61	10	5	8	10	5	0	69.6	By MS/MS	By MS/MS	By MS/MS	By MS/MS	By MS/MS	By MS/MS
A0A1L1SU24;A0A1L1STN5;A0A1L1SRY8;A0A1L1SSY9;Q9DCU6;A0A1L1SV70	A0A1L1SU24;A0A1L1STN5;A0A1L1SRY8;A0A1L1SSY9;Q9DCU6	3;3;3;3;3;1	3;3;3;3;3;1	3;3;3;3;3;1	39S ribosomal protein L4, mitochondrial	Mrpl4	tr|A0A1L1SU24|A0A1L1SU24_MOUSE 39S ribosomal protein L4, mitochondrial OS=Mus musculus OX=10090 GN=Mrpl4 PE=1 SV=1;tr|A0A1L1STN5|A0A1L1STN5_MOUSE 39S ribosomal protein L4, mitochondrial OS=Mus musculus OX=10090 GN=Mrpl4 PE=1 SV=1;tr|A0A1L1SRY8|A0A1L1SRY8_M	6	3	3	3	3	1	2	2	1	2	3	1	2	2	1	2	3	1	2	2	1	2	25	25	25	18.081	160	160;172;219;264;294;33	5.45				6	5	0	22.322	By MS/MS	By MS/MS	By MS/MS	By MS/MS	By MS/MS	By MS/MS
A0A1L1SS10;Q9Z2X8	A0A1L1SS10;Q9Z2X8	3;3	3;3	3;3	Kelch-like ECH-associated protein 1	Keap1	tr|A0A1L1SS10|A0A1L1SS10_MOUSE Kelch-like ECH-associated protein 1 OS=Mus musculus OX=10090 GN=Keap1 PE=1 SV=1;sp|Q9Z2X8|KEAP1_MOUSE Kelch-like ECH-associated protein 1 OS=Mus musculus OX=10090 GN=Keap1 PE=1 SV=1	2	3	3	3	1	1	2	2	1	1	1	1	2	2	1	1	1	1	2	2	1	1	7.4	7.4	7.4	69.126	620	620;624	5				8		0	6.4095	By MS/MS	By MS/MS	By MS/MS	By MS/MS	By MS/MS	By MS/MS
A0A1L1SS44;Q60709;Q06335-2;Q06335	A0A1L1SS44;Q60709;Q06335-2;Q06335	3;3;2;2	3;3;2;2	3;3;2;2	Amyloid-like protein 2	Aplp2	tr|A0A1L1SS44|A0A1L1SS44_MOUSE Amyloid-like protein 2 (Fragment) OS=Mus musculus OX=10090 GN=Aplp2 PE=1 SV=1;tr|Q60709|Q60709_MOUSE Amyloid-like protein 2 OS=Mus musculus OX=10090 GN=Aplp2 PE=1 SV=1;sp|Q06335-2|APLP2_MOUSE Isoform 2 of Amyloid-like protein	4	3	3	3	2	2	0	2	1	2	2	2	0	2	1	2	2	2	0	2	1	2	4	4	4	71.302	624	624;751;695;707	3.92	3	2	3		5	0.00020934	4.7385	By MS/MS	By MS/MS		By MS/MS	By MS/MS	By matching
A0A1L1SS93;Q8BGE7	A0A1L1SS93;Q8BGE7	2;2	2;2	2;2	Tripartite motif-containing protein 6	Trim6	tr|A0A1L1SS93|A0A1L1SS93_MOUSE Tripartite motif-containing protein 6 OS=Mus musculus OX=10090 GN=Trim6 PE=1 SV=1;sp|Q8BGE7|TRIM6_MOUSE Tripartite motif-containing protein 6 OS=Mus musculus OX=10090 GN=Trim6 PE=1 SV=1	2	2	2	2	2	2	2	2	2	1	2	2	2	2	2	1	2	2	2	2	2	1	4.3	4.3	4.3	53.281	462	462;488	4.5			9	6	1	0.00059043	3.6993	By MS/MS	By MS/MS	By MS/MS	By MS/MS	By MS/MS	By MS/MS
A0A338P6N2;D3YVV0;E9Q723;A0A1L1SSC7;Q3UMK4	A0A338P6N2;D3YVV0;E9Q723;A0A1L1SSC7;Q3UMK4	2;2;2;2;1	2;2;2;2;1	2;2;2;2;1		Ttc13	tr|A0A338P6N2|A0A338P6N2_MOUSE Tetratricopeptide repeat domain 13 OS=Mus musculus OX=10090 GN=Ttc13 PE=1 SV=1;tr|D3YVV0|D3YVV0_MOUSE Tetratricopeptide repeat domain 13 OS=Mus musculus OX=10090 GN=Ttc13 PE=1 SV=2;tr|E9Q723|E9Q723_MOUSE Tetratricopeptide rep	5	2	2	2	0	1	1	1	2	1	0	1	1	1	2	1	0	1	1	1	2	1	4.2	4.2	4.2	80.378	715	715;738;792;844;759	5			2	4	2	0.00040717	4.2896		By MS/MS	By MS/MS	By MS/MS	By MS/MS	By MS/MS
Q3UDS7;A0A1L1SSF2;Q8VDL4-3;Q8VDL4	Q3UDS7;A0A1L1SSF2;Q8VDL4-3;Q8VDL4	2;2;2;2	2;2;2;2	2;2;2;2	ADP-dependent glucokinase	Adpgk	tr|Q3UDS7|Q3UDS7_MOUSE ADP-dependent glucokinase OS=Mus musculus OX=10090 GN=Adpgk PE=1 SV=1;tr|A0A1L1SSF2|A0A1L1SSF2_MOUSE ADP-dependent glucokinase OS=Mus musculus OX=10090 GN=Adpgk PE=1 SV=1;sp|Q8VDL4-3|ADPGK_MOUSE Isoform 3 of ADP-dependent glucokinase	4	2	2	2	1	2	2	2	1	2	1	2	2	2	1	2	1	2	2	2	1	2	3.6	3.6	3.6	53.788	495	495;496;495;496	3.72	6		4	3	5	0.002885	2.541	By MS/MS	By MS/MS	By MS/MS	By MS/MS	By MS/MS	By MS/MS
A0A1L1SSF8;Q91V76	A0A1L1SSF8;Q91V76	5;5	5;5	5;5	Ester hydrolase C11orf54 homolog		tr|A0A1L1SSF8|A0A1L1SSF8_MOUSE RIKEN cDNA 4931406C07 gene OS=Mus musculus OX=10090 GN=4931406C07Rik PE=1 SV=1;sp|Q91V76|CK054_MOUSE Ester hydrolase C11orf54 homolog OS=Mus musculus OX=10090 PE=1 SV=1	2	5	5	5	3	3	4	3	4	2	3	3	4	3	4	2	3	3	4	3	4	2	24.8	24.8	24.8	31.334	282	282;315	3.43	8	11	2		9	0	29.006	By MS/MS	By MS/MS	By MS/MS	By MS/MS	By MS/MS	By MS/MS
Q5NCU4;A0A1L1SSH9;P07214;Q5NCU3	Q5NCU4;A0A1L1SSH9;P07214;Q5NCU3	6;6;6;4	6;6;6;4	6;6;6;4	SPARC	Sparc	tr|Q5NCU4|Q5NCU4_MOUSE SPARC OS=Mus musculus OX=10090 GN=Sparc PE=1 SV=1;tr|A0A1L1SSH9|A0A1L1SSH9_MOUSE SPARC OS=Mus musculus OX=10090 GN=Sparc PE=1 SV=1;sp|P07214|SPRC_MOUSE SPARC OS=Mus musculus OX=10090 GN=Sparc PE=1 SV=1;tr|Q5NCU3|Q5NCU3_MOUSE SPARC (F	4	6	6	6	5	3	5	5	4	4	5	3	5	5	4	4	5	3	5	5	4	4	32.2	32.2	32.2	34.322	301	301;332;302;172	4.21	12	2	5	1	23	0	32.644	By MS/MS	By MS/MS	By MS/MS	By MS/MS	By MS/MS	By MS/MS
A0A1L1SSL9;E9QPK4;Q9JKK8	A0A1L1SSL9;E9QPK4;Q9JKK8	6;6;6	6;6;6	6;6;6	Serine/threonine-protein kinase ATR	Atr	tr|A0A1L1SSL9|A0A1L1SSL9_MOUSE Serine/threonine-protein kinase ATR OS=Mus musculus OX=10090 GN=Atr PE=1 SV=1;tr|E9QPK4|E9QPK4_MOUSE Serine/threonine-protein kinase ATR OS=Mus musculus OX=10090 GN=Atr PE=1 SV=2;sp|Q9JKK8|ATR_MOUSE Serine/threonine-protein k	3	6	6	6	4	4	4	5	4	4	4	4	4	5	4	4	4	4	4	5	4	4	2.5	2.5	2.5	301.02	2641	2641;2635;2635	4.68		5	7	4	9	0	12.329	By MS/MS	By MS/MS	By MS/MS	By MS/MS	By MS/MS	By MS/MS
Q8BRT1-5;A0A1L1ST22;Q8BSE7	Q8BRT1-5;A0A1L1ST22	9;9;4	1;1;1	1;1;1	CLIP-associating protein 2	Clasp2	sp|Q8BRT1-5|CLAP2_MOUSE Isoform 2 of CLIP-associating protein 2 OS=Mus musculus OX=10090 GN=Clasp2;tr|A0A1L1ST22|A0A1L1ST22_MOUSE CLIP-associating protein 2 OS=Mus musculus OX=10090 GN=Clasp2 PE=1 SV=1	3	9	1	1	7	7	8	7	8	8	1	1	1	1	1	1	1	1	1	1	1	1	19.5	2	2	66.369	600	600;600;400	3	6		4	4		0	7.7148	By MS/MS	By MS/MS	By MS/MS	By matching	By MS/MS	By MS/MS
A0A1L1STC6;Q6ZWR6-4;Q6ZWR6;A0A1L1SRV6;Q6ZWR6-5	A0A1L1STC6;Q6ZWR6-4;Q6ZWR6	5;5;5;2;1	5;5;5;2;1	5;5;5;2;1	Nesprin-1	Syne1	tr|A0A1L1STC6|A0A1L1STC6_MOUSE Nesprin-1 OS=Mus musculus OX=10090 GN=Syne1 PE=1 SV=1;sp|Q6ZWR6-4|SYNE1_MOUSE Isoform 4 of Nesprin-1 OS=Mus musculus OX=10090 GN=Syne1;sp|Q6ZWR6|SYNE1_MOUSE Nesprin-1 OS=Mus musculus OX=10090 GN=Syne1 PE=1 SV=2	5	5	5	5	4	3	5	3	4	3	4	3	5	3	4	3	4	3	5	3	4	3	1.1	1.1	1.1	1009.9	8799	8799;8797;8799;1288;1431	3.56	12		6	16	2	0	6.6124	By MS/MS	By MS/MS	By MS/MS	By MS/MS	By MS/MS	By MS/MS
A0A1L1STE6;Q9D6R2;Q9D6R2-2	A0A1L1STE6;Q9D6R2;Q9D6R2-2	15;15;11	15;15;11	15;15;11	Isocitrate dehydrogenase [NAD] subunit alpha, mitochondrial	Idh3a	tr|A0A1L1STE6|A0A1L1STE6_MOUSE Isocitrate dehydrogenase [NAD] subunit, mitochondrial OS=Mus musculus OX=10090 GN=Idh3a PE=1 SV=1;sp|Q9D6R2|IDH3A_MOUSE Isocitrate dehydrogenase [NAD] subunit alpha, mitochondrial OS=Mus musculus OX=10090 GN=Idh3a PE=1 SV=1;s	3	15	15	15	12	13	13	13	14	12	12	13	13	13	14	12	12	13	13	13	14	12	34.1	34.1	34.1	41.52	384	384;366;288	3.35	59	5	23	33	27	0	233.61	By MS/MS	By MS/MS	By MS/MS	By MS/MS	By MS/MS	By MS/MS
A0A1L1SU70;Q9JKK7	A0A1L1SU70;Q9JKK7	2;2	1;1	1;1	Tropomodulin-2	Tmod2	tr|A0A1L1SU70|A0A1L1SU70_MOUSE Tropomodulin 2, isoform CRA_c OS=Mus musculus OX=10090 GN=Tmod2 PE=1 SV=1;sp|Q9JKK7|TMOD2_MOUSE Tropomodulin-2 OS=Mus musculus OX=10090 GN=Tmod2 PE=1 SV=2	2	2	1	1	2	1	2	1	1	1	1	0	1	0	0	0	1	0	1	0	0	0	12.1	8.9	8.9	27.808	248	248;351	5				2		0.00095621	3.2932	By MS/MS	By matching	By MS/MS	By matching	By matching	By matching
A0A1L1SUR6;Q3TEI4	A0A1L1SUR6;Q3TEI4	2;2	2;2	2;2	Uncharacterized protein C15orf39 homolog		tr|A0A1L1SUR6|A0A1L1SUR6_MOUSE RIKEN cDNA 1700017B05 gene OS=Mus musculus OX=10090 GN=1700017B05Rik PE=1 SV=1;sp|Q3TEI4|CO039_MOUSE Uncharacterized protein C15orf39 homolog OS=Mus musculus OX=10090 PE=1 SV=2	2	2	2	2	2	1	0	1	0	1	2	1	0	1	0	1	2	1	0	1	0	1	3	3	3	96.179	908	908;1023	5.6			1		4	0.00096265	3.3741	By MS/MS	By MS/MS		By MS/MS		By matching
A0A1L1SUS7;Q8K0D0-2;Q8K0D0	A0A1L1SUS7;Q8K0D0-2;Q8K0D0	7;7;7	6;6;6	4;4;4	Cyclin-dependent kinase 17	Cdk17	tr|A0A1L1SUS7|A0A1L1SUS7_MOUSE Cyclin-dependent kinase 17 (Fragment) OS=Mus musculus OX=10090 GN=Cdk17 PE=1 SV=1;sp|Q8K0D0-2|CDK17_MOUSE Isoform 2 of Cyclin-dependent kinase 17 OS=Mus musculus OX=10090 GN=Cdk17;sp|Q8K0D0|CDK17_MOUSE Cyclin-dependent kinase	3	7	6	4	5	6	5	6	4	5	4	5	4	5	3	4	2	3	2	3	1	2	15.4	13.7	9.6	54.513	481	481;430;523	3.63	12	2	11	9	7	0	15.037	By MS/MS	By MS/MS	By MS/MS	By MS/MS	By MS/MS	By MS/MS
A0A1L1SV73;Q8BY87-2;Q8BY87	A0A1L1SV73;Q8BY87-2;Q8BY87	22;22;21	22;22;21	22;22;21	Ubiquitin carboxyl-terminal hydrolase 47	Usp47	tr|A0A1L1SV73|A0A1L1SV73_MOUSE Ubiquitin carboxyl-terminal hydrolase 47 OS=Mus musculus OX=10090 GN=Usp47 PE=1 SV=1;sp|Q8BY87-2|UBP47_MOUSE Isoform 2 of Ubiquitin carboxyl-terminal hydrolase 47 OS=Mus musculus OX=10090 GN=Usp47;sp|Q8BY87|UBP47_MOUSE Ubiqui	3	22	22	22	15	14	17	17	15	16	15	14	17	17	15	16	15	14	17	17	15	16	18.2	18.2	18.2	157.15	1376	1376;1356;1376	3.87	21	32	18	21	29	0	90.759	By MS/MS	By MS/MS	By MS/MS	By MS/MS	By MS/MS	By MS/MS
A0A1L1SVD8;Q9JHS9	A0A1L1SVD8;Q9JHS9	2;2	2;2	2;2	Spliceosome-associated protein CWC15 homolog	Cwc15	tr|A0A1L1SVD8|A0A1L1SVD8_MOUSE Spliceosome-associated protein CWC15 homolog (Fragment) OS=Mus musculus OX=10090 GN=Cwc15 PE=1 SV=1;sp|Q9JHS9|CWC15_MOUSE Spliceosome-associated protein CWC15 homolog OS=Mus musculus OX=10090 GN=Cwc15 PE=1 SV=1	2	2	2	2	2	2	2	2	2	1	2	2	2	2	2	1	2	2	2	2	2	1	27.8	27.8	27.8	9.174	79	79;229	3.77		6	4	3		0.00041042	4.4431	By MS/MS	By MS/MS	By MS/MS	By MS/MS	By MS/MS	By MS/MS
A0A1L1SVG6;Q8BY89-2;Q8BY89	A0A1L1SVG6;Q8BY89-2;Q8BY89	1;1;1	1;1;1	1;1;1	Choline transporter-like protein 2	Slc44a2	tr|A0A1L1SVG6|A0A1L1SVG6_MOUSE Choline transporter-like protein 2 OS=Mus musculus OX=10090 GN=Slc44a2 PE=1 SV=1;sp|Q8BY89-2|CTL2_MOUSE Isoform 2 of Choline transporter-like protein 2 OS=Mus musculus OX=10090 GN=Slc44a2;sp|Q8BY89|CTL2_MOUSE Choline transpor	3	1	1	1	1	1	1	0	1	0	1	1	1	0	1	0	1	1	1	0	1	0	2	2	2	62.643	554	554;704;706	6					4	0.0023775	2.7163	By MS/MS	By MS/MS	By MS/MS		By MS/MS
A0A1S6GWJ4;Q91VN6	A0A1S6GWJ4;Q91VN6	14;14	14;14	14;14	Probable ATP-dependent RNA helicase DDX41	Ddx41	tr|A0A1S6GWJ4|A0A1S6GWJ4_MOUSE DEAD (Asp-Glu-Ala-Asp) box polypeptide 41 OS=Mus musculus OX=10090 GN=Ddx41 PE=1 SV=1;sp|Q91VN6|DDX41_MOUSE Probable ATP-dependent RNA helicase DDX41 OS=Mus musculus OX=10090 GN=Ddx41 PE=1 SV=2	2	14	14	14	10	9	10	9	9	11	10	9	10	9	9	11	10	9	10	9	9	11	22.7	22.7	22.7	71.1	633	633;622	3.77	18	14	21	27	10	0	43.618	By MS/MS	By MS/MS	By MS/MS	By MS/MS	By MS/MS	By MS/MS
A0A1W2P6E6;Q9D289	A0A1W2P6E6;Q9D289	4;4	4;4	4;4	Trafficking protein particle complex subunit 6B	Trappc6b	tr|A0A1W2P6E6|A0A1W2P6E6_MOUSE Trafficking protein particle complex subunit 6B OS=Mus musculus OX=10090 GN=Trappc6b PE=1 SV=1;sp|Q9D289|TPC6B_MOUSE Trafficking protein particle complex subunit 6B OS=Mus musculus OX=10090 GN=Trappc6b PE=1 SV=1	2	4	4	4	3	3	3	3	3	3	3	3	3	3	3	3	3	3	3	3	3	3	33.3	33.3	33.3	10.568	96	96;158	4.33	5		10		12	0	23.88	By MS/MS	By MS/MS	By MS/MS	By MS/MS	By MS/MS	By MS/MS
A0A1W2P6M6;Q8BMI4-2;Q8BMI4	A0A1W2P6M6;Q8BMI4-2;Q8BMI4	1;1;1	1;1;1	1;1;1	Flap endonuclease GEN homolog 1	Gen1	tr|A0A1W2P6M6|A0A1W2P6M6_MOUSE Flap endonuclease GEN homolog 1 (Fragment) OS=Mus musculus OX=10090 GN=Gen1 PE=1 SV=1;sp|Q8BMI4-2|GEN_MOUSE Isoform 2 of Flap endonuclease GEN homolog 1 OS=Mus musculus OX=10090 GN=Gen1;sp|Q8BMI4|GEN_MOUSE Flap endonuclease G	3	1	1	1	1	1	1	1	0	1	1	1	1	1	0	1	1	1	1	1	0	1	2.7	2.7	2.7	82.19	739	739;843;908	3		5				0	5.3411	By MS/MS	By MS/MS	By MS/MS	By MS/MS		By matching
A0A1W2P6P1;Q8BJU0-2;Q8BJU0;A0A1W2P7I5	A0A1W2P6P1;Q8BJU0-2;Q8BJU0;A0A1W2P7I5	7;7;7;4	7;7;7;4	7;7;7;4	Small glutamine-rich tetratricopeptide repeat-containing protein alpha	Sgta	tr|A0A1W2P6P1|A0A1W2P6P1_MOUSE Small glutamine-rich tetratricopeptide repeat-containing protein alpha (Fragment) OS=Mus musculus OX=10090 GN=Sgta PE=1 SV=1;sp|Q8BJU0-2|SGTA_MOUSE Isoform 2 of Small glutamine-rich tetratricopeptide repeat-containing protein	4	7	7	7	7	7	7	7	7	7	7	7	7	7	7	7	7	7	7	7	7	7	38.9	38.9	38.9	23.214	211	211;314;315;166	4.03	33	7	13	21	44	0	70.652	By MS/MS	By MS/MS	By MS/MS	By MS/MS	By MS/MS	By MS/MS
F8VPM0;E9Q374;A0A1W2P6X9;Q91YE5-2;Q91YE5;Q91YE5-3;A0A1W2P6L0	F8VPM0;E9Q374;A0A1W2P6X9;Q91YE5-2;Q91YE5;Q91YE5-3	12;12;12;12;12;12;2	12;12;12;12;12;12;2	12;12;12;12;12;12;2	Bromodomain adjacent to zinc finger domain protein 2A	Baz2a	tr|F8VPM0|F8VPM0_MOUSE Bromodomain adjacent to zinc finger domain protein 2A OS=Mus musculus OX=10090 GN=Baz2a PE=1 SV=1;tr|E9Q374|E9Q374_MOUSE Bromodomain adjacent to zinc finger domain protein 2A OS=Mus musculus OX=10090 GN=Baz2a PE=1 SV=1;tr|A0A1W2P6X9|	7	12	12	12	10	10	6	6	8	5	10	10	6	6	8	5	10	10	6	6	8	5	8.1	8.1	8.1	209.4	1887	1887;1888;1890;1888;1889;1890;763	4.4	3	6	9	29	3	0	20.272	By MS/MS	By MS/MS	By MS/MS	By MS/MS	By MS/MS	By MS/MS
A0A1W2P712;A0A2I3BRX9;Q6GYP7-6;Q6GYP7;Q6GYP7-2;A0A1W2P832;Q6GYP7-5;Q6GYP7-3;A0A1W2P7Y4;Q6GYP7-4	A0A1W2P712;A0A2I3BRX9;Q6GYP7-6;Q6GYP7;Q6GYP7-2;A0A1W2P832;Q6GYP7-5;Q6GYP7-3	3;3;3;3;3;2;2;2;1;1	3;3;3;3;3;2;2;2;1;1	3;3;3;3;3;2;2;2;1;1	Ral GTPase-activating protein subunit alpha-1	Ralgapa1	tr|A0A1W2P712|A0A1W2P712_MOUSE Ral GTPase-activating protein subunit alpha-1 OS=Mus musculus OX=10090 GN=Ralgapa1 PE=1 SV=1;tr|A0A2I3BRX9|A0A2I3BRX9_MOUSE Ral GTPase-activating protein subunit alpha-1 OS=Mus musculus OX=10090 GN=Ralgapa1 PE=1 SV=1;sp|Q6GYP	10	3	3	3	1	1	1	3	0	1	1	1	1	3	0	1	1	1	1	3	0	1	1.6	1.6	1.6	234.17	2082	2082;2538;1480;2035;2068;2082;567;737;172;1037	4.57		3		1	3	0.00060496	4.125	By matching	By MS/MS	By MS/MS	By MS/MS		By matching
A0A1W2P729;Q9QXT0	A0A1W2P729;Q9QXT0	4;4	4;4	4;4	Protein canopy homolog 2	Cnpy2	tr|A0A1W2P729|A0A1W2P729_MOUSE Protein canopy homolog 2 (Fragment) OS=Mus musculus OX=10090 GN=Cnpy2 PE=1 SV=1;sp|Q9QXT0|CNPY2_MOUSE Protein canopy homolog 2 OS=Mus musculus OX=10090 GN=Cnpy2 PE=1 SV=1	2	4	4	4	4	3	3	2	3	2	4	3	3	2	3	2	4	3	3	2	3	2	25	25	25	15.316	136	136;182	2.65	6	9	5			0	23.964	By MS/MS	By MS/MS	By MS/MS	By MS/MS	By MS/MS	By MS/MS
A0A1W2P737;F8VPV0;P48725-3;P48725	A0A1W2P737;F8VPV0;P48725-3;P48725	18;18;18;18	18;18;18;18	3;3;3;3	Pericentrin	Pcnt	tr|A0A1W2P737|A0A1W2P737_MOUSE Pericentrin OS=Mus musculus OX=10090 GN=Pcnt PE=1 SV=1;tr|F8VPV0|F8VPV0_MOUSE Pericentrin OS=Mus musculus OX=10090 GN=Pcnt PE=1 SV=1;sp|P48725-3|PCNT_MOUSE Isoform 3 of Pericentrin OS=Mus musculus OX=10090 GN=Pcnt;sp|P48725|P	4	18	18	3	10	9	12	8	7	9	10	9	12	8	7	9	3	3	1	1	1	1	9.2	9.2	1.8	329.46	2898	2898;2916;2500;2898	4.08	5	13	18	23	5	0	52.164	By MS/MS	By MS/MS	By MS/MS	By MS/MS	By MS/MS	By MS/MS
A0A1W2P768;P84228;P68433;F8WI35;E0CYR7;E0CYN1	A0A1W2P768;P84228;P68433;F8WI35	12;12;10;9;2;1	12;12;10;9;2;1	3;3;1;0;0;0	Histone H3.2;Histone H3.1;Histone H3	Hist1h3b;Hist1h3a;H3f3a	tr|A0A1W2P768|A0A1W2P768_MOUSE H3 clustered histone 14 OS=Mus musculus OX=10090 GN=H3c14 PE=1 SV=1;sp|P84228|H32_MOUSE Histone H3.2 OS=Mus musculus OX=10090 GN=Hist1h3b PE=1 SV=2;sp|P68433|H31_MOUSE Histone H3.1 OS=Mus musculus OX=10090 GN=H3c1 PE=1 SV=2;t	6	12	12	3	12	11	12	11	10	9	12	11	12	11	10	9	3	3	3	2	1	1	51.9	51.9	24.9	20.246	181	181;136;136;135;55;52	2.97	117	30	23	39	42	0	323.31	By MS/MS	By MS/MS	By MS/MS	By MS/MS	By MS/MS	By MS/MS
Q6ZWZ6;F7AEH4;A0A1W2P7A1;P63323	Q6ZWZ6;F7AEH4;A0A1W2P7A1;P63323	8;8;8;7	8;8;8;7	8;8;8;7	40S ribosomal protein S12	Rps12	tr|Q6ZWZ6|Q6ZWZ6_MOUSE 40S ribosomal protein S12 OS=Mus musculus OX=10090 GN=Rps12-ps3 PE=1 SV=1;tr|F7AEH4|F7AEH4_MOUSE 40S ribosomal protein S12 OS=Mus musculus OX=10090 GN=Rps12 PE=1 SV=1;tr|A0A1W2P7A1|A0A1W2P7A1_MOUSE 40S ribosomal protein S12 OS=Mus mu	4	8	8	8	8	7	7	8	7	8	8	7	7	8	7	8	8	7	7	8	7	8	54.5	54.5	54.5	14.515	132	132;137;148;132	3.87	92	17	19	19	120	0	184.02	By MS/MS	By MS/MS	By MS/MS	By MS/MS	By MS/MS	By MS/MS
A0A1W2P7F0;Q99LQ1	A0A1W2P7F0;Q99LQ1	1;1	1;1	1;1	MAP3K12-binding inhibitory protein 1	Mbip	tr|A0A1W2P7F0|A0A1W2P7F0_MOUSE MAP3K12-binding inhibitory protein 1 OS=Mus musculus OX=10090 GN=Mbip PE=1 SV=1;sp|Q99LQ1|MBIP1_MOUSE MAP3K12-binding inhibitory protein 1 OS=Mus musculus OX=10090 GN=Mbip PE=1 SV=1	2	1	1	1	1	0	0	0	0	0	1	0	0	0	0	0	1	0	0	0	0	0	28.6	28.6	28.6	5.3711	49	49;341	3		1				0	6.0499	By MS/MS
A0A1W2P7G3;P23950	A0A1W2P7G3;P23950	1;1	1;1	1;1	Zinc finger protein 36, C3H1 type-like 1	Zfp36l1	tr|A0A1W2P7G3|A0A1W2P7G3_MOUSE mRNA decay activator protein ZFP36L1 OS=Mus musculus OX=10090 GN=Zfp36l1 PE=1 SV=1;sp|P23950|TISB_MOUSE mRNA decay activator protein ZFP36L1 OS=Mus musculus OX=10090 GN=Zfp36l1 PE=1 SV=1	2	1	1	1	1	1	1	1	1	1	1	1	1	1	1	1	1	1	1	1	1	1	21.4	21.4	21.4	9.2648	84	84;338	3.5	5				5	0	53.749	By MS/MS	By MS/MS	By MS/MS	By MS/MS	By MS/MS	By MS/MS
Q61133;A0A1W2P7J9;A0A1W2P6L1	Q61133;A0A1W2P7J9;A0A1W2P6L1	4;4;2	4;4;2	3;3;1	Glutathione S-transferase theta-2	Gstt2	sp|Q61133|GSTT2_MOUSE Glutathione S-transferase theta-2 OS=Mus musculus OX=10090 GN=Gstt2 PE=1 SV=4;tr|A0A1W2P7J9|A0A1W2P7J9_MOUSE Glutathione S-transferase theta-2 (Fragment) OS=Mus musculus OX=10090 GN=Gstt2 PE=1 SV=1;tr|A0A1W2P6L1|A0A1W2P6L1_MOUSE Gluta	3	4	4	3	3	3	3	3	3	3	3	3	3	3	3	3	2	2	3	2	2	2	19.7	19.7	16.8	27.634	244	244;182;170	4.76	5			11	13	0	13.61	By MS/MS	By MS/MS	By MS/MS	By MS/MS	By MS/MS	By MS/MS
A0A1W2P7K2;Q9CQE6	A0A1W2P7K2;Q9CQE6	2;2	2;2	2;2	Histone chaperone ASF1A	Asf1a	tr|A0A1W2P7K2|A0A1W2P7K2_MOUSE ASF1 anti-silencing function 1 homolog A (S. cerevisiae), isoform CRA_a OS=Mus musculus OX=10090 GN=Asf1a PE=1 SV=1;sp|Q9CQE6|ASF1A_MOUSE Histone chaperone ASF1A OS=Mus musculus OX=10090 GN=Asf1a PE=1 SV=1	2	2	2	2	2	1	1	1	1	1	2	1	1	1	1	1	2	1	1	1	1	1	26.9	26.9	26.9	15.029	134	134;204	3.27		10			1	0	17.279	By MS/MS	By MS/MS	By MS/MS	By MS/MS	By MS/MS	By matching
A0A1W2P7K6;Q68EF0	A0A1W2P7K6;Q68EF0	2;2	2;2	2;2	Rab-3A-interacting protein	Rab3ip	tr|A0A1W2P7K6|A0A1W2P7K6_MOUSE RAB3A interacting protein, isoform CRA_b OS=Mus musculus OX=10090 GN=Rab3ip PE=1 SV=1;sp|Q68EF0|RAB3I_MOUSE Rab-3A-interacting protein OS=Mus musculus OX=10090 GN=Rab3ip PE=1 SV=1	2	2	2	2	2	2	2	2	2	1	2	2	2	2	2	1	2	2	2	2	2	1	7	7	7	50.894	460	460;428	3.65	2	4	7	4		0	8.406	By MS/MS	By MS/MS	By MS/MS	By MS/MS	By MS/MS	By MS/MS
A0A1W2P7P4;P28574-2;P28574	A0A1W2P7P4;P28574-2;P28574	2;2;2	2;2;2	2;2;2	Protein max	Max	tr|A0A1W2P7P4|A0A1W2P7P4_MOUSE Protein max OS=Mus musculus OX=10090 GN=Max PE=1 SV=1;sp|P28574-2|MAX_MOUSE Isoform 2 of Protein max OS=Mus musculus OX=10090 GN=Max;sp|P28574|MAX_MOUSE Protein max OS=Mus musculus OX=10090 GN=Max PE=1 SV=2	3	2	2	2	2	2	2	2	2	1	2	2	2	2	2	1	2	2	2	2	2	1	25.8	25.8	25.8	14.027	124	124;151;160	3.28	11		7	10	1	0	14.292	By MS/MS	By MS/MS	By MS/MS	By MS/MS	By MS/MS	By MS/MS
Q9CRT8;A0A1W2P7Q6;A0A1W2P7V1	Q9CRT8;A0A1W2P7Q6	11;11;1	11;11;1	11;11;1	Exportin-T	Xpot	sp|Q9CRT8|XPOT_MOUSE Exportin-T OS=Mus musculus OX=10090 GN=Xpot PE=1 SV=3;tr|A0A1W2P7Q6|A0A1W2P7Q6_MOUSE Exportin-T OS=Mus musculus OX=10090 GN=Xpot PE=1 SV=1	3	11	11	11	9	8	9	10	9	9	9	8	9	10	9	9	9	8	9	10	9	9	14.2	14.2	14.2	109.73	963	963;962;206	4.38	17		20	18	33	0	53.519	By MS/MS	By MS/MS	By MS/MS	By MS/MS	By MS/MS	By MS/MS
A0A1W2P7U1;Q8CFI2;A0A1W2P861;A0A1W2P7T2;A0A1W2P8B1;A0A1W2P7U9	A0A1W2P7U1;Q8CFI2	4;4;1;1;1;1	4;4;1;1;1;1	3;3;0;0;1;1	Ubiquitin-conjugating enzyme E2 R1	Cdc34	tr|A0A1W2P7U1|A0A1W2P7U1_MOUSE Ubiquitin-conjugating enzyme E2 R1 OS=Mus musculus OX=10090 GN=Cdc34 PE=1 SV=1;sp|Q8CFI2|UB2R1_MOUSE Ubiquitin-conjugating enzyme E2 R1 OS=Mus musculus OX=10090 GN=Cdc34 PE=1 SV=1	6	4	4	3	4	4	4	4	4	4	4	4	4	4	4	4	3	3	3	3	3	3	21.6	21.6	15.8	21.439	190	190;235;44;116;159;162	3.33	19		11	3	12	0	37.203	By MS/MS	By MS/MS	By MS/MS	By MS/MS	By MS/MS	By MS/MS
A0A1W2P7V0;K3W4Q9;Q8BH60-2;Q8BH60	A0A1W2P7V0;K3W4Q9;Q8BH60-2;Q8BH60	1;1;1;1	1;1;1;1	1;1;1;1	Golgi-associated PDZ and coiled-coil motif-containing protein	Gopc	tr|A0A1W2P7V0|A0A1W2P7V0_MOUSE Golgi-associated PDZ and coiled-coil motif-containing protein (Fragment) OS=Mus musculus OX=10090 GN=Gopc PE=1 SV=1;tr|K3W4Q9|K3W4Q9_MOUSE Golgi-associated PDZ and coiled-coil motif-containing protein OS=Mus musculus OX=10090	4	1	1	1	1	1	1	0	0	1	1	1	1	0	0	1	1	1	1	0	0	1	4.7	4.7	4.7	44.672	403	403;463;455;463	5				4		0.000584	3.5274	By MS/MS	By MS/MS	By MS/MS			By MS/MS
A0A1W2P7X0;E9QMV2;Q4KML4	A0A1W2P7X0;E9QMV2;Q4KML4	2;2;2	2;2;2	2;2;2	Costars family protein ABRACL	Abracl	tr|A0A1W2P7X0|A0A1W2P7X0_MOUSE Costars family protein ABRACL (Fragment) OS=Mus musculus OX=10090 GN=Abracl PE=1 SV=1;tr|E9QMV2|E9QMV2_MOUSE Costars family protein ABRACL OS=Mus musculus OX=10090 GN=Abracl PE=1 SV=1;sp|Q4KML4|ABRAL_MOUSE Costars family prot	3	2	2	2	2	2	2	2	1	2	2	2	2	2	1	2	2	2	2	2	1	2	43.9	43.9	43.9	6.4374	57	57;81;81	4.24	6				11	0	69.26	By MS/MS	By MS/MS	By MS/MS	By MS/MS	By MS/MS	By MS/MS
B2RRF0;A0A1W2P7Y1;P35822	B2RRF0;A0A1W2P7Y1;P35822	2;2;2	2;2;2	2;2;2	Protein-tyrosine-phosphatase;Receptor-type tyrosine-protein phosphatase kappa	Ptprk	tr|B2RRF0|B2RRF0_MOUSE Ptprk protein OS=Mus musculus OX=10090 GN=Ptprk PE=1 SV=1;tr|A0A1W2P7Y1|A0A1W2P7Y1_MOUSE Receptor-type tyrosine-protein phosphatase kappa OS=Mus musculus OX=10090 GN=Ptprk PE=1 SV=1;sp|P35822|PTPRK_MOUSE Receptor-type tyrosine-protei	3	2	2	2	2	1	1	1	0	1	2	1	1	1	0	1	2	1	1	1	0	1	2.6	2.6	2.6	163	1445	1445;1471;1457	3.5		5			1	0	6.8058	By MS/MS	By MS/MS	By MS/MS	By MS/MS		By MS/MS
Q8VHI3;A0A1W2P7Z1;A0A1W2P844	Q8VHI3;A0A1W2P7Z1;A0A1W2P844	2;2;1	2;2;1	2;2;1	GDP-fucose protein O-fucosyltransferase 2	Pofut2	sp|Q8VHI3|OFUT2_MOUSE GDP-fucose protein O-fucosyltransferase 2 OS=Mus musculus OX=10090 GN=Pofut2 PE=1 SV=1;tr|A0A1W2P7Z1|A0A1W2P7Z1_MOUSE GDP-fucose protein O-fucosyltransferase 2 (Fragment) OS=Mus musculus OX=10090 GN=Pofut2 PE=1 SV=1;tr|A0A1W2P844|A0A1	3	2	2	2	2	1	2	2	2	1	2	1	2	2	2	1	2	1	2	2	2	1	7.2	7.2	7.2	49.429	429	429;209;164	2.4	6		2	2		0.0011351	3.1303	By MS/MS	By matching	By MS/MS	By MS/MS	By MS/MS	By matching
A0A1W2P865;Q9D945;Q9D945-2	A0A1W2P865;Q9D945;Q9D945-2	3;3;2	3;3;2	3;3;2	Protein LLP homolog	Llph	tr|A0A1W2P865|A0A1W2P865_MOUSE Protein LLP homolog OS=Mus musculus OX=10090 GN=Llph PE=1 SV=1;sp|Q9D945|LLPH_MOUSE Protein LLP homolog OS=Mus musculus OX=10090 GN=Llph PE=1 SV=1;sp|Q9D945-2|LLPH_MOUSE Isoform 2 of Protein LLP homolog OS=Mus musculus OX=100	3	3	3	3	3	3	3	3	3	2	3	3	3	3	3	2	3	3	3	3	3	2	51.3	51.3	51.3	8.7721	76	76;130;129	2.58	15	7	8	1	2	0	9.743	By MS/MS	By MS/MS	By MS/MS	By MS/MS	By MS/MS	By MS/MS
A0A1W2P872;D3YVV7;Q9JKN6	A0A1W2P872;D3YVV7;Q9JKN6	3;3;2	3;3;2	3;3;2	RNA-binding protein Nova-1	Nova2;Nova1	tr|A0A1W2P872|A0A1W2P872_MOUSE NOVA alternative-splicing regulator 2 OS=Mus musculus OX=10090 GN=Nova2 PE=1 SV=1;tr|D3YVV7|D3YVV7_MOUSE NOVA alternative-splicing regulator 2 OS=Mus musculus OX=10090 GN=Nova2 PE=1 SV=3;sp|Q9JKN6|NOVA1_MOUSE RNA-binding prot	3	3	3	3	3	3	3	3	2	2	3	3	3	3	2	2	3	3	3	3	2	2	8.1	8.1	8.1	49.066	492	492;556;507	4.41	6			5	11	0	10.862	By MS/MS	By MS/MS	By MS/MS	By MS/MS	By MS/MS	By MS/MS
A0A1W2P8C2;Q8BHN7-2;Q8BHN7;A0A1W2P7E2	A0A1W2P8C2;Q8BHN7-2;Q8BHN7;A0A1W2P7E2	3;3;3;2	3;3;3;2	3;3;3;2	Uncharacterized protein C12orf29 homolog		tr|A0A1W2P8C2|A0A1W2P8C2_MOUSE RIKEN cDNA 4930430F08 gene (Fragment) OS=Mus musculus OX=10090 GN=4930430F08Rik PE=1 SV=1;sp|Q8BHN7-2|CL029_MOUSE Isoform 2 of Uncharacterized protein C12orf29 homolog OS=Mus musculus OX=10090;sp|Q8BHN7|CL029_MOUSE Uncharacte	4	3	3	3	2	1	1	2	2	1	2	1	1	2	2	1	2	1	1	2	2	1	21.8	21.8	21.8	16.978	147	147;273;327;225	4.5	4	1		4	9	0	10.059	By MS/MS	By MS/MS	By MS/MS	By MS/MS	By MS/MS	By MS/MS
A0A1W2P8C6;P41731	A0A1W2P8C6;P41731	2;2	2;2	2;2	CD63 antigen	Cd63	tr|A0A1W2P8C6|A0A1W2P8C6_MOUSE Tetraspanin (Fragment) OS=Mus musculus OX=10090 GN=Cd63 PE=1 SV=1;sp|P41731|CD63_MOUSE CD63 antigen OS=Mus musculus OX=10090 GN=Cd63 PE=1 SV=2	2	2	2	2	1	2	1	1	1	1	1	2	1	1	1	1	1	2	1	1	1	1	11	11	11	17.865	164	164;238	4.39	8		13	16	14	0	15.671	By MS/MS	By MS/MS	By MS/MS	By MS/MS	By MS/MS	By MS/MS
A0A1Y7VIR0	A0A1Y7VIR0	2	1	1			tr|A0A1Y7VIR0|A0A1Y7VIR0_MOUSE Serine/threonine-protein phosphatase 2A 56 kDa regulatory subunit gamma isoform (Fragment) OS=Mus musculus OX=10090 GN=Ppp2r5c PE=1 SV=1	1	2	1	1	2	2	1	1	2	2	1	1	1	1	1	1	1	1	1	1	1	1	8.8	4.2	4.2	32.844	283	283	4			6			0.0023753	2.7083	By MS/MS	By MS/MS	By MS/MS	By MS/MS	By MS/MS	By matching
A0A1Y7VJ32;Q9EQ20	A0A1Y7VJ32;Q9EQ20	1;1	1;1	1;1	Methylmalonate-semialdehyde dehydrogenase [acylating], mitochondrial	Aldh6a1	tr|A0A1Y7VJ32|A0A1Y7VJ32_MOUSE Methylmalonate-semialdehyde dehydrogenase [acylating], mitochondrial (Fragment) OS=Mus musculus OX=10090 GN=Aldh6a1 PE=1 SV=1;sp|Q9EQ20|MMSA_MOUSE Methylmalonate-semialdehyde dehydrogenase [acylating], mitochondrial OS=Mus mu	2	1	1	1	1	1	1	1	0	1	1	1	1	1	0	1	1	1	1	1	0	1	8.1	8.1	8.1	14.563	135	135;535	3		5				0.0081882	2.0699	By MS/MS	By MS/MS	By MS/MS	By MS/MS		By MS/MS
A0A1Y7VJ48;P48428	A0A1Y7VJ48;P48428	8;8	8;8	8;8	Tubulin-specific chaperone A	Tbca	tr|A0A1Y7VJ48|A0A1Y7VJ48_MOUSE Tubulin-specific chaperone A OS=Mus musculus OX=10090 GN=Tbca PE=1 SV=1;sp|P48428|TBCA_MOUSE Tubulin-specific chaperone A OS=Mus musculus OX=10090 GN=Tbca PE=1 SV=3	2	8	8	8	8	7	8	7	7	6	8	7	8	7	7	6	8	7	8	7	7	6	72.6	72.6	72.6	9.9271	84	84;108	2.93	35	15	36	6	5	0	279.44	By MS/MS	By MS/MS	By MS/MS	By MS/MS	By MS/MS	By MS/MS
A0A1Y7VJ59;A0A1Y7VMK7;A0A1Y7VLF5;A0A1Y7VJ98;A0A1Y7VN75;Q9D0V8-2;Q9D0V8-3;Q9D0V8	A0A1Y7VJ59;A0A1Y7VMK7;A0A1Y7VLF5;A0A1Y7VJ98;A0A1Y7VN75;Q9D0V8-2;Q9D0V8-3;Q9D0V8	2;2;2;2;2;2;2;2	2;2;2;2;2;2;2;2	2;2;2;2;2;2;2;2	Cyclin-dependent kinase 2-interacting protein	Cinp	tr|A0A1Y7VJ59|A0A1Y7VJ59_MOUSE Cyclin-dependent kinase 2-interacting protein OS=Mus musculus OX=10090 GN=Cinp PE=1 SV=1;tr|A0A1Y7VMK7|A0A1Y7VMK7_MOUSE Cyclin-dependent kinase 2-interacting protein (Fragment) OS=Mus musculus OX=10090 GN=Cinp PE=1 SV=1;tr|A0	8	2	2	2	0	0	2	1	0	1	0	0	2	1	0	1	0	0	2	1	0	1	33.8	33.8	33.8	7.6737	71	71;116;118;145;262;117;137;212	5.25				3	1	0	5.4542			By MS/MS	By MS/MS		By MS/MS
Q8BX20;Q3UTA4;Q3UT53;Q3TQZ4;J3QQ02;J3QPI8;J3QP87;J3QNT6;J3QMW5;A0A1Y7VNG9;A0A1Y7VLT7;A0A1Y7VK80;A0A1Y7VJE9;F6YNI8	Q8BX20;Q3UTA4;Q3UT53;Q3TQZ4;J3QQ02;J3QPI8;J3QP87;J3QNT6;J3QMW5;A0A1Y7VNG9;A0A1Y7VLT7;A0A1Y7VK80;A0A1Y7VJE9;F6YNI8	2;2;2;2;2;2;2;2;2;2;2;2;2;1	1;1;1;1;1;1;1;1;1;1;1;1;1;1	1;1;1;1;1;1;1;1;1;1;1;1;1;1		Gm5662;Gm8300;Gm4027;Gm2016;Gm2056;Gm6803;Gm2035;Gm5039;Gm2075;Gm21319	tr|Q8BX20|Q8BX20_MOUSE Predicted gene 5662 OS=Mus musculus OX=10090 GN=Gm5662 PE=2 SV=1;tr|Q3UTA4|Q3UTA4_MOUSE Predicted gene 8300 OS=Mus musculus OX=10090 GN=Gm8332 PE=2 SV=1;tr|Q3UT53|Q3UT53_MOUSE Expressed sequence BB287469 OS=Mus musculus OX=10090 GN=B	14	2	1	1	2	2	2	2	2	2	1	1	1	1	1	1	1	1	1	1	1	1	14.6	7.6	7.6	16.556	144	144;144;144;144;144;144;144;144;144;144;144;144;144;144	2	5	5				0.00096637	3.433	By MS/MS	By MS/MS	By MS/MS	By MS/MS	By MS/MS	By matching
A0A1Y7VJU1;Q9D3R3;A0A1Y7VNL4;Q9D3R3-2	A0A1Y7VJU1;Q9D3R3;A0A1Y7VNL4;Q9D3R3-2	3;3;2;2	3;3;2;2	3;3;2;2	Centrosomal protein of 72 kDa	Cep72	tr|A0A1Y7VJU1|A0A1Y7VJU1_MOUSE Centrosomal protein of 72 kDa (Fragment) OS=Mus musculus OX=10090 GN=Cep72 PE=1 SV=1;sp|Q9D3R3|CEP72_MOUSE Centrosomal protein of 72 kDa OS=Mus musculus OX=10090 GN=Cep72 PE=1 SV=3;tr|A0A1Y7VNL4|A0A1Y7VNL4_MOUSE Centrosomal p	4	3	3	3	3	3	3	3	3	3	3	3	3	3	3	3	3	3	3	3	3	3	8.5	8.5	8.5	52.464	470	470;646;295;280	4		6	6	6		0	8.5107	By MS/MS	By MS/MS	By MS/MS	By MS/MS	By MS/MS	By MS/MS
Q9WVL0;A0A1Y7VJZ2;A0A1Y7VNC1	Q9WVL0;A0A1Y7VJZ2;A0A1Y7VNC1	5;5;4	5;5;4	5;5;4	Maleylacetoacetate isomerase	Gstz1	sp|Q9WVL0|MAAI_MOUSE Maleylacetoacetate isomerase OS=Mus musculus OX=10090 GN=Gstz1 PE=1 SV=1;tr|A0A1Y7VJZ2|A0A1Y7VJZ2_MOUSE Glutathione transferase zeta 1 (Maleylacetoacetate isomerase), isoform CRA_c OS=Mus musculus OX=10090 GN=Gstz1 PE=1 SV=1;tr|A0A1Y7V	3	5	5	5	5	1	3	5	2	2	5	1	3	5	2	2	5	1	3	5	2	2	37	37	37	24.275	216	216;215;161	4.18	3	2	5	9	3	0	10.515	By MS/MS	By MS/MS	By MS/MS	By MS/MS	By MS/MS	By MS/MS
A0A1Y7VK42;K3W4R3;Q91WZ8-2;Q91WZ8	A0A1Y7VK42;K3W4R3;Q91WZ8-2;Q91WZ8	1;1;1;1	1;1;1;1	1;1;1;1	Dysbindin	Dtnbp1	tr|A0A1Y7VK42|A0A1Y7VK42_MOUSE Dysbindin OS=Mus musculus OX=10090 GN=Dtnbp1 PE=1 SV=1;tr|K3W4R3|K3W4R3_MOUSE Dysbindin OS=Mus musculus OX=10090 GN=Dtnbp1 PE=1 SV=1;sp|Q91WZ8-2|DTBP1_MOUSE Isoform 2 of Dysbindin OS=Mus musculus OX=10090 GN=Dtnbp1;sp|Q91WZ8|	4	1	1	1	0	1	1	0	0	1	0	1	1	0	0	1	0	1	1	0	0	1	7.3	7.3	7.3	20.406	178	178;352;300;352	5				3		0.0096602	1.9646		By MS/MS	By MS/MS			By MS/MS
E0CY91;E0CYW1;E0CY38;A0A1Y7VKT9;E0CZB3;Q9EPV8	E0CY91;E0CYW1;E0CY38;A0A1Y7VKT9;E0CZB3;Q9EPV8	4;4;4;4;4;4	4;4;4;4;4;4	4;4;4;4;4;4	Ubiquitin-like protein 5	Ubl5	tr|E0CY91|E0CY91_MOUSE Ubiquitin-like protein 5 OS=Mus musculus OX=10090 GN=Ubl5 PE=4 SV=1;tr|E0CYW1|E0CYW1_MOUSE Ubiquitin-like protein 5 (Fragment) OS=Mus musculus OX=10090 GN=Ubl5 PE=1 SV=1;tr|E0CY38|E0CY38_MOUSE Ubiquitin-like 5, isoform CRA_a OS=Mus m	6	4	4	4	4	2	3	3	1	3	4	2	3	3	1	3	4	2	3	3	1	3	74.5	74.5	74.5	5.4004	47	47;56;72;73;113;73	3.27	14	2	1	4	9	0	9.8031	By MS/MS	By MS/MS	By MS/MS	By MS/MS	By matching	By MS/MS
A0A1Y7VKW0;Q62158;F6U3T5;A0A1Y7VJ13	A0A1Y7VKW0;Q62158;F6U3T5;A0A1Y7VJ13	2;2;1;1	2;2;1;1	2;2;1;1	Zinc finger protein RFP	Trim27	tr|A0A1Y7VKW0|A0A1Y7VKW0_MOUSE Zinc finger protein RFP OS=Mus musculus OX=10090 GN=Trim27 PE=1 SV=1;sp|Q62158|TRI27_MOUSE Zinc finger protein RFP OS=Mus musculus OX=10090 GN=Trim27 PE=1 SV=2;tr|F6U3T5|F6U3T5_MOUSE Zinc finger protein RFP (Fragment) OS=Mus	4	2	2	2	1	0	0	0	1	1	1	0	0	0	1	1	1	0	0	0	1	1	7.6	7.6	7.6	36.247	314	314;513;61;337	6					3	0.0022104	2.7934	By MS/MS				By MS/MS	By MS/MS
A0A1Y7VLN4;E9QKQ5;Q91ZP3-2;Q91ZP3	A0A1Y7VLN4;E9QKQ5;Q91ZP3-2;Q91ZP3	2;2;2;2	2;2;2;2	2;2;2;2	Phosphatidate phosphatase LPIN1	Lpin1	tr|A0A1Y7VLN4|A0A1Y7VLN4_MOUSE Phosphatidate phosphatase LPIN1 OS=Mus musculus OX=10090 GN=Lpin1 PE=1 SV=1;tr|E9QKQ5|E9QKQ5_MOUSE Phosphatidate phosphatase LPIN1 OS=Mus musculus OX=10090 GN=Lpin1 PE=1 SV=2;sp|Q91ZP3-2|LPIN1_MOUSE Isoform 2 of Phosphatidate	4	2	2	2	2	0	0	0	0	0	2	0	0	0	0	0	2	0	0	0	0	0	2.4	2.4	2.4	98.535	891	891;924;891;924	5			1		1	0.00060926	4.2561	By MS/MS
A0A1Y7VLP0;P56379	A0A1Y7VLP0;P56379	1;1	1;1	1;1	6.8 kDa mitochondrial proteolipid	Mp68	tr|A0A1Y7VLP0|A0A1Y7VLP0_MOUSE ATP synthase subunit ATP5MPL, mitochondrial (Fragment) OS=Mus musculus OX=10090 GN=Atp5mpl PE=1 SV=1;sp|P56379|ATP68_MOUSE ATP synthase subunit ATP5MPL, mitochondrial OS=Mus musculus OX=10090 GN=Atp5mpl PE=1 SV=1	2	1	1	1	1	1	1	1	1	1	1	1	1	1	1	1	1	1	1	1	1	1	14	14	14	6.5608	57	57;58	4.83	6			12	18	0.00040692	4.2753	By MS/MS	By MS/MS	By MS/MS	By MS/MS	By MS/MS	By MS/MS
P52503;A0A1Y7VM38;A0A1Y7VKP8	P52503;A0A1Y7VM38;A0A1Y7VKP8	3;3;2	3;3;2	3;3;2	NADH dehydrogenase [ubiquinone] iron-sulfur protein 6, mitochondrial	Ndufs6	sp|P52503|NDUS6_MOUSE NADH dehydrogenase [ubiquinone] iron-sulfur protein 6, mitochondrial OS=Mus musculus OX=10090 GN=Ndufs6 PE=1 SV=2;tr|A0A1Y7VM38|A0A1Y7VM38_MOUSE NADH dehydrogenase [ubiquinone] iron-sulfur protein 6, mitochondrial OS=Mus musculus OX=1	3	3	3	3	3	2	3	3	3	3	3	2	3	3	3	3	3	2	3	3	3	3	42.2	42.2	42.2	13.02	116	116;124;98	3	17		8	10	2	0	89.38	By MS/MS	By MS/MS	By MS/MS	By MS/MS	By MS/MS	By MS/MS
A0A1Y7VM65;Q9QUH0	A0A1Y7VM65;Q9QUH0	2;2	2;2	2;2	Glutaredoxin-1	Glrx	tr|A0A1Y7VM65|A0A1Y7VM65_MOUSE Glutaredoxin-1 OS=Mus musculus OX=10090 GN=Glrx PE=1 SV=1;sp|Q9QUH0|GLRX1_MOUSE Glutaredoxin-1 OS=Mus musculus OX=10090 GN=Glrx PE=1 SV=3	2	2	2	2	2	1	1	2	2	2	2	1	1	2	2	2	2	1	1	2	2	2	22.6	22.6	22.6	9.3868	84	84;107	3.48	6	4	5	6	2	0	6.2245	By MS/MS	By MS/MS	By MS/MS	By MS/MS	By MS/MS	By MS/MS
A0A1Y7VM69;Q9D4H4-2;Q9D4H4	A0A1Y7VM69;Q9D4H4-2;Q9D4H4	1;1;1	1;1;1	1;1;1	Angiomotin-like protein 1	Amotl1	tr|A0A1Y7VM69|A0A1Y7VM69_MOUSE Angiomotin-like protein 1 OS=Mus musculus OX=10090 GN=Amotl1 PE=1 SV=1;sp|Q9D4H4-2|AMOL1_MOUSE Isoform 2 of Angiomotin-like protein 1 OS=Mus musculus OX=10090 GN=Amotl1;sp|Q9D4H4|AMOL1_MOUSE Angiomotin-like protein 1 OS=Mus m	3	1	1	1	1	0	0	1	1	0	1	0	0	1	1	0	1	0	0	1	1	0	1.4	1.4	1.4	111.75	1005	1005;882;968	4			3			0.0098022	1.9257	By MS/MS			By MS/MS	By MS/MS
A0A1Y7VM77;E9QLN8;O70338	A0A1Y7VM77;E9QLN8;O70338	2;2;2	2;2;2	2;2;2	Ribonuclease H1	Rnaseh1	tr|A0A1Y7VM77|A0A1Y7VM77_MOUSE Ribonuclease H1 OS=Mus musculus OX=10090 GN=Rnaseh1 PE=1 SV=1;tr|E9QLN8|E9QLN8_MOUSE Ribonuclease H1 OS=Mus musculus OX=10090 GN=Rnaseh1 PE=1 SV=1;sp|O70338|RNH1_MOUSE Ribonuclease H1 OS=Mus musculus OX=10090 GN=Rnaseh1 PE=2	3	2	2	2	2	1	2	0	2	2	2	1	2	0	2	2	2	1	2	0	2	2	11.6	11.6	11.6	22.069	198	198;285;285	5.44				5	4	0.00021231	5.0038	By MS/MS	By MS/MS	By MS/MS		By MS/MS	By MS/MS
A0A1Y7VMH7;A0A1Y7VME9;E9Q9B7;A0A1Y7VNF8	A0A1Y7VMH7;A0A1Y7VME9;E9Q9B7;A0A1Y7VNF8	4;4;4;2	4;4;4;2	4;4;4;2		Kidins220	tr|A0A1Y7VMH7|A0A1Y7VMH7_MOUSE Kinase D-interacting substrate 220 OS=Mus musculus OX=10090 GN=Kidins220 PE=1 SV=1;tr|A0A1Y7VME9|A0A1Y7VME9_MOUSE Kinase D-interacting substrate 220 OS=Mus musculus OX=10090 GN=Kidins220 PE=1 SV=1;tr|E9Q9B7|E9Q9B7_MOUSE Kinas	4	4	4	4	2	0	1	1	0	1	2	0	1	1	0	1	2	0	1	1	0	1	2.4	2.4	2.4	185.53	1672	1672;1763;1793;1182	5.33			1	2	3	0	5.4839	By MS/MS		By MS/MS	By MS/MS		By MS/MS
A0A1Y7VMH3;Q80X41-2;Q80X41-5;Q80X41-3;Q80X41;A0A1Y7VLL5	A0A1Y7VMH3;Q80X41-2;Q80X41-5;Q80X41-3;Q80X41	9;9;9;9;9;1	9;9;9;9;9;1	9;9;9;9;9;1	Serine/threonine-protein kinase VRK1	Vrk1	tr|A0A1Y7VMH3|A0A1Y7VMH3_MOUSE Serine/threonine-protein kinase VRK1 OS=Mus musculus OX=10090 GN=Vrk1 PE=1 SV=1;sp|Q80X41-2|VRK1_MOUSE Isoform 2 of Serine/threonine-protein kinase VRK1 OS=Mus musculus OX=10090 GN=Vrk1;sp|Q80X41-5|VRK1_MOUSE Isoform 5 of Ser	6	9	9	9	8	6	7	7	4	7	8	6	7	7	4	7	8	6	7	7	4	7	27.6	27.6	27.6	46.845	413	413;396;414;416;440;63	3.2	25	12	17	1	15	0	65.439	By MS/MS	By MS/MS	By MS/MS	By MS/MS	By MS/MS	By MS/MS
F8VPK5;A0A1Y7VMN0;P70336;P70336-2;A0A1Y7VLD1	F8VPK5;A0A1Y7VMN0;P70336;P70336-2	26;26;26;26;7	26;26;26;26;7	22;22;22;22;7	Rho-associated protein kinase;Rho-associated protein kinase 2	Rock2	tr|F8VPK5|F8VPK5_MOUSE Rho-associated protein kinase OS=Mus musculus OX=10090 GN=Rock2 PE=1 SV=1;tr|A0A1Y7VMN0|A0A1Y7VMN0_MOUSE Rho-associated protein kinase 2 (Fragment) OS=Mus musculus OX=10090 GN=Rock2 PE=1 SV=1;sp|P70336|ROCK2_MOUSE Rho-associated prot	5	26	26	22	24	15	17	19	16	18	24	15	17	19	16	18	20	12	14	15	13	15	24.1	24.1	20.5	160.61	1388	1388;1444;1388;1444;262	3.27	49	18	45	15	21	0	206.29	By MS/MS	By MS/MS	By MS/MS	By MS/MS	By MS/MS	By MS/MS
A0A1Y7VN19;Q9CXR1	A0A1Y7VN19;Q9CXR1	4;4	4;4	4;4	Dehydrogenase/reductase SDR family member 7	Dhrs7	tr|A0A1Y7VN19|A0A1Y7VN19_MOUSE Dehydrogenase/reductase SDR family member 7 (Fragment) OS=Mus musculus OX=10090 GN=Dhrs7 PE=1 SV=1;sp|Q9CXR1|DHRS7_MOUSE Dehydrogenase/reductase SDR family member 7 OS=Mus musculus OX=10090 GN=Dhrs7 PE=1 SV=2	2	4	4	4	1	1	0	2	3	2	1	1	0	2	3	2	1	1	0	2	3	2	10.5	10.5	10.5	40.589	362	362;338	4.33			7	1	1	0	6.1781	By MS/MS	By MS/MS		By MS/MS	By MS/MS	By MS/MS
A0A217FL60;A0A1Y7VN36;Q8K0G5	A0A217FL60;A0A1Y7VN36;Q8K0G5	2;2;2	2;2;2	2;2;2	Protein TSSC1	Tssc1	tr|A0A217FL60|A0A217FL60_MOUSE EARP and GARP complex-interacting protein 1 OS=Mus musculus OX=10090 GN=Eipr1 PE=1 SV=1;tr|A0A1Y7VN36|A0A1Y7VN36_MOUSE EARP and GARP complex-interacting protein 1 (Fragment) OS=Mus musculus OX=10090 GN=Eipr1 PE=1 SV=1;sp|Q8K0	3	2	2	2	2	0	0	2	0	1	2	0	0	2	0	1	2	0	0	2	0	1	13.3	13.3	13.3	15.234	135	135;172;386	6					5	0.0096518	1.9541	By MS/MS			By matching		By matching
A0A1Y7VN66;O54956	A0A1Y7VN66;O54956	2;2	2;2	2;2	DNA polymerase epsilon subunit 2	Pole2	tr|A0A1Y7VN66|A0A1Y7VN66_MOUSE DNA polymerase epsilon subunit OS=Mus musculus OX=10090 GN=Pole2 PE=1 SV=1;sp|O54956|DPOE2_MOUSE DNA polymerase epsilon subunit 2 OS=Mus musculus OX=10090 GN=Pole2 PE=2 SV=2	2	2	2	2	1	0	1	0	0	2	1	0	1	0	0	2	1	0	1	0	0	2	5.8	5.8	5.8	56.705	502	502;527	5			2		2	0.000593	3.7523	By matching		By MS/MS			By MS/MS
A0A1Y7VNZ6;Q03141-2;Q03141-3;Q03141;Q8VHJ5;A0A0A6YY78;A0A1Y7VK86;A0A1Y7VJB1	A0A1Y7VNZ6;Q03141-2;Q03141-3;Q03141;Q8VHJ5	9;9;9;9;5;4;1;1	9;9;9;9;5;4;1;1	6;6;6;6;2;1;1;1	MAP/microtubule affinity-regulating kinase 3;Serine/threonine-protein kinase MARK1	Mark3;Mark1	tr|A0A1Y7VNZ6|A0A1Y7VNZ6_MOUSE Non-specific serine/threonine protein kinase OS=Mus musculus OX=10090 GN=Mark3 PE=1 SV=1;sp|Q03141-2|MARK3_MOUSE Isoform 2 of MAP/microtubule affinity-regulating kinase 3 OS=Mus musculus OX=10090 GN=Mark3;sp|Q03141-3|MARK3_MO	8	9	9	6	7	8	8	6	8	7	7	8	8	6	8	7	4	5	5	3	5	4	17.2	17.2	12	88.828	797	797;729;744;753;795;153;54;111	4.14		12	20	15	2	0	79.092	By MS/MS	By MS/MS	By MS/MS	By MS/MS	By MS/MS	By MS/MS
A0A1Y7VP67;E9Q2I4	A0A1Y7VP67;E9Q2I4	3;3	3;3	3;3		Elmsan1	tr|A0A1Y7VP67|A0A1Y7VP67_MOUSE ELM2 and Myb/SANT-like domain-containing 1 (Fragment) OS=Mus musculus OX=10090 GN=Elmsan1 PE=1 SV=1;tr|E9Q2I4|E9Q2I4_MOUSE ELM2 and Myb/SANT-like domain-containing 1 OS=Mus musculus OX=10090 GN=Elmsan1 PE=1 SV=1	2	3	3	3	1	1	1	2	1	1	1	1	1	2	1	1	1	1	1	2	1	1	3.7	3.7	3.7	117.87	1071	1071;1089	3.71		4	2		1	0	6.3007	By matching	By MS/MS	By MS/MS	By MS/MS	By MS/MS	By MS/MS
A0A286YCQ0;A0A286YDN0;E9Q6A3;E9PYX6;E9QNA7;D3Z5J3;A0A286YCI8;Q62417-5;Q62417-6;Q62417-4;Q62417-3;Q62417-2;Q62417-7;Q62417;A0A286YD34	A0A286YCQ0;A0A286YDN0;E9Q6A3;E9PYX6;E9QNA7;D3Z5J3;A0A286YCI8;Q62417-5;Q62417-6;Q62417-4;Q62417-3;Q62417-2;Q62417-7;Q62417	6;6;6;6;6;6;6;6;6;6;6;6;6;6;1	6;6;6;6;6;6;6;6;6;6;6;6;6;6;1	6;6;6;6;6;6;6;6;6;6;6;6;6;6;1	Sorbin and SH3 domain-containing protein 1	Sorbs1	tr|A0A286YCQ0|A0A286YCQ0_MOUSE Sorbin and SH3 domain-containing protein 1 OS=Mus musculus OX=10090 GN=Sorbs1 PE=1 SV=1;tr|A0A286YDN0|A0A286YDN0_MOUSE Sorbin and SH3 domain-containing protein 1 OS=Mus musculus OX=10090 GN=Sorbs1 PE=1 SV=1;tr|E9Q6A3|E9Q6A3_M	15	6	6	6	3	2	5	2	3	2	3	2	5	2	3	2	3	2	5	2	3	2	11.1	11.1	11.1	76.383	684	684;695;714;724;740;938;1290;684;695;714;724;740;836;1290;126	3.95		4	14	3		0	29.664	By MS/MS	By MS/MS	By MS/MS	By MS/MS	By MS/MS	By MS/MS
Q8BTY2;D3Y272;A0A286YCS4;A0A286YCX2;I1VGT4;F8VQC9;I1VGT5;J9RV59;E3UVT8;H6WZ45;I1VGT6;H6WZF5;D3Y273;J9RDH0;A0A286YD46;Q8BTY2-2;A0A286YDJ7;E3UVT9;A0A286YDK8	Q8BTY2;D3Y272;A0A286YCS4;A0A286YCX2;I1VGT4;F8VQC9;I1VGT5;J9RV59;E3UVT8;H6WZ45;I1VGT6;H6WZF5;D3Y273;J9RDH0;A0A286YD46;Q8BTY2-2;A0A286YDJ7;E3UVT9;A0A286YDK8	5;5;5;5;5;5;5;5;4;4;4;4;4;4;4;4;4;3;3	5;5;5;5;5;5;5;5;4;4;4;4;4;4;4;4;4;3;3	2;2;2;2;2;2;2;2;1;1;1;1;1;1;1;1;1;0;0	Sodium bicarbonate cotransporter 3;Anion exchange protein	Slc4a7	sp|Q8BTY2|S4A7_MOUSE Sodium bicarbonate cotransporter 3 OS=Mus musculus OX=10090 GN=Slc4a7 PE=1 SV=2;tr|D3Y272|D3Y272_MOUSE Anion exchange protein OS=Mus musculus OX=10090 GN=Slc4a7 PE=1 SV=1;tr|A0A286YCS4|A0A286YCS4_MOUSE Anion exchange protein OS=Mus mus	19	5	5	2	3	3	2	5	2	4	3	3	2	5	2	4	1	1	1	2	2	1	7.9	7.9	4.3	116.51	1034	1034;1118;1248;1243;1151;1131;1138;1254;1126;1113;1133;1146;1095;1205;1220;936;932;1200;1215	4.31	3	10	2		14	0	28.079	By MS/MS	By MS/MS	By MS/MS	By MS/MS	By MS/MS	By MS/MS
A0A286YCV9;E9Q4K7;A0A286YD28	A0A286YCV9;E9Q4K7	16;16;3	16;16;3	15;15;2	Kinesin-like protein	Kif13b	tr|A0A286YCV9|A0A286YCV9_MOUSE Kinesin family member 13B OS=Mus musculus OX=10090 GN=Kif13b PE=1 SV=1;tr|E9Q4K7|E9Q4K7_MOUSE Kinesin family member 13B OS=Mus musculus OX=10090 GN=Kif13b PE=1 SV=1	3	16	16	15	13	11	13	11	9	8	13	11	13	11	9	8	13	10	13	11	9	8	11.7	11.7	11.1	204.94	1847	1847;1843;151	4.27	11	14	14	39	17	0	76.17	By MS/MS	By MS/MS	By MS/MS	By MS/MS	By MS/MS	By MS/MS
A0A286YCX6;E9PY51;A0A286YCE0	A0A286YCX6;E9PY51	10;8;1	10;8;1	10;8;1		Trappc8	tr|A0A286YCX6|A0A286YCX6_MOUSE Trafficking protein particle complex 8 OS=Mus musculus OX=10090 GN=Trappc8 PE=1 SV=2;tr|E9PY51|E9PY51_MOUSE Trafficking protein particle complex 8 OS=Mus musculus OX=10090 GN=Trappc8 PE=1 SV=1	3	10	10	10	8	3	5	6	7	5	8	3	5	6	7	5	8	3	5	6	7	5	8.4	8.4	8.4	160.91	1437	1437;822;112	4.28	1	10	11	12	6	0	32.564	By MS/MS	By MS/MS	By MS/MS	By MS/MS	By MS/MS	By MS/MS
A0A286YCZ5;Q99M01;A0A286YCZ4;G3X9Q4	A0A286YCZ5;Q99M01;A0A286YCZ4;G3X9Q4	2;2;1;1	2;2;1;1	2;2;1;1	Phenylalanine--tRNA ligase, mitochondrial	Fars2	tr|A0A286YCZ5|A0A286YCZ5_MOUSE Phenylalanine--tRNA ligase, mitochondrial OS=Mus musculus OX=10090 GN=Fars2 PE=1 SV=1;sp|Q99M01|SYFM_MOUSE Phenylalanine--tRNA ligase, mitochondrial OS=Mus musculus OX=10090 GN=Fars2 PE=1 SV=1;tr|A0A286YCZ4|A0A286YCZ4_MOUSE P	4	2	2	2	2	1	2	2	1	1	2	1	2	2	1	1	2	1	2	2	1	1	7	7	7	53.529	470	470;451;202;219	5				9		0	7.1312	By MS/MS	By MS/MS	By MS/MS	By MS/MS	By MS/MS	By matching
Q91YP2;A0A286YD12;A0A286YD77	Q91YP2;A0A286YD12	9;9;2	9;9;2	9;9;2	Neurolysin, mitochondrial	Nln	sp|Q91YP2|NEUL_MOUSE Neurolysin, mitochondrial OS=Mus musculus OX=10090 GN=Nln PE=1 SV=1;tr|A0A286YD12|A0A286YD12_MOUSE Neurolysin, mitochondrial OS=Mus musculus OX=10090 GN=Nln PE=1 SV=1	3	9	9	9	7	5	7	8	7	5	7	5	7	8	7	5	7	5	7	8	7	5	17.3	17.3	17.3	80.428	704	704;683;151	4.15	11	8	7	9	20	0	29.626	By MS/MS	By MS/MS	By MS/MS	By MS/MS	By MS/MS	By MS/MS
A0A286YD76	A0A286YD76	12	2	2			tr|A0A286YD76|A0A286YD76_MOUSE Microtubule-actin cross-linking factor 1 (Fragment) OS=Mus musculus OX=10090 GN=Macf1 PE=1 SV=1	1	12	2	2	12	11	10	12	9	8	2	2	1	2	1	1	2	2	1	2	1	1	12.4	1.8	1.8	147.16	1358	1358	5.89				1	8	0.00059253	3.739	By MS/MS	By MS/MS	By MS/MS	By MS/MS	By MS/MS	By MS/MS
A0A286YDA2;A0A286YDT3;E9Q5C9;A0A286YDV7;E9Q5C9-2;A0A286YCD1;A0A286YDZ1	A0A286YDA2;A0A286YDT3;E9Q5C9;A0A286YDV7;E9Q5C9-2	18;18;18;18;17;6;3	18;18;18;18;17;6;3	18;18;18;18;17;6;3		Nolc1	tr|A0A286YDA2|A0A286YDA2_MOUSE Nucleolar and coiled-body phosphoprotein 1 OS=Mus musculus OX=10090 GN=Nolc1 PE=1 SV=1;tr|A0A286YDT3|A0A286YDT3_MOUSE Nucleolar and coiled-body phosphoprotein 1 OS=Mus musculus OX=10090 GN=Nolc1 PE=1 SV=1;sp|E9Q5C9|NOLC1_MOUS	7	18	18	18	17	14	15	16	13	15	17	14	15	16	13	15	17	14	15	16	13	15	21.7	21.7	21.7	73.427	700	700;701;702;702;664;197;36	3.16	75	33	23	42	25	0	65.81	By MS/MS	By MS/MS	By MS/MS	By MS/MS	By MS/MS	By MS/MS
A0A286YDB3;Q80XQ2	A0A286YDB3;Q80XQ2	2;2	2;2	2;2	TBC1 domain family member 5	Tbc1d5	tr|A0A286YDB3|A0A286YDB3_MOUSE TBC1 domain family member 5 OS=Mus musculus OX=10090 GN=Tbc1d5 PE=1 SV=1;sp|Q80XQ2|TBCD5_MOUSE TBC1 domain family member 5 OS=Mus musculus OX=10090 GN=Tbc1d5 PE=1 SV=2	2	2	2	2	1	0	1	1	0	0	1	0	1	1	0	0	1	0	1	1	0	0	2.6	2.6	2.6	94.017	837	837;815	2	2		1			0.0028855	2.5416	By MS/MS		By MS/MS	By MS/MS
A6H611;A0A286YDC5;A0A286YCX4	A6H611;A0A286YDC5;A0A286YCX4	2;2;1	2;2;1	2;2;1	Mitochondrial intermediate peptidase	Mipep	sp|A6H611|MIPEP_MOUSE Mitochondrial intermediate peptidase OS=Mus musculus OX=10090 GN=Mipep PE=1 SV=1;tr|A0A286YDC5|A0A286YDC5_MOUSE Mitochondrial intermediate peptidase OS=Mus musculus OX=10090 GN=Mipep PE=1 SV=1;tr|A0A286YCX4|A0A286YCX4_MOUSE Mitochondr	3	2	2	2	2	2	2	2	2	2	2	2	2	2	2	2	2	2	2	2	2	2	2.8	2.8	2.8	80.851	711	711;568;210	4	2		6	6		0	5.7204	By MS/MS	By MS/MS	By MS/MS	By MS/MS	By MS/MS	By MS/MS
A0A286YDF5;Q69ZN7;E9Q390;Q69ZN7-4;A0A286YCZ3;Q69ZN7-2;Q69ZN7-3	A0A286YDF5;Q69ZN7;E9Q390;Q69ZN7-4;A0A286YCZ3;Q69ZN7-2	29;29;28;24;15;15;5	29;29;28;24;15;15;5	29;29;28;24;15;15;5	Myoferlin	Myof	tr|A0A286YDF5|A0A286YDF5_MOUSE Myoferlin OS=Mus musculus OX=10090 GN=Myof PE=1 SV=1;sp|Q69ZN7|MYOF_MOUSE Myoferlin OS=Mus musculus OX=10090 GN=Myof PE=1 SV=2;tr|E9Q390|E9Q390_MOUSE Myoferlin OS=Mus musculus OX=10090 GN=Myof PE=1 SV=2;sp|Q69ZN7-4|MYOF_MOUSE	7	29	29	29	25	19	22	20	22	18	25	19	22	20	22	18	25	19	22	20	22	18	17.8	17.8	17.8	234.52	2061	2061;2048;2048;1823;1307;921;292	3.58	39	38	40	37	22	0	73.169	By MS/MS	By MS/MS	By MS/MS	By MS/MS	By MS/MS	By MS/MS
G3X972;A0A286YDI8;A0A286YD08	G3X972;A0A286YDI8	15;15;3	15;15;3	15;15;3		Sec24c	tr|G3X972|G3X972_MOUSE SEC24 related gene family, member C (S. cerevisiae), isoform CRA_a OS=Mus musculus OX=10090 GN=Sec24c PE=1 SV=1;tr|A0A286YDI8|A0A286YDI8_MOUSE Sec24-related gene family, member C (S. cerevisiae) OS=Mus musculus OX=10090 GN=Sec24c PE=	3	15	15	15	12	8	12	13	13	13	12	8	12	13	13	13	12	8	12	13	13	13	16	16	16	118.58	1096	1096;1020;174	3.89	20	15	26	12	26	0	130.9	By MS/MS	By MS/MS	By MS/MS	By MS/MS	By MS/MS	By MS/MS
A0A286YDK2;Q91VC9	A0A286YDK2;Q91VC9	1;1	1;1	1;1	Growth hormone-inducible transmembrane protein	Ghitm	tr|A0A286YDK2|A0A286YDK2_MOUSE Growth hormone-inducible transmembrane protein (Fragment) OS=Mus musculus OX=10090 GN=Ghitm PE=1 SV=1;sp|Q91VC9|GHITM_MOUSE Growth hormone-inducible transmembrane protein OS=Mus musculus OX=10090 GN=Ghitm PE=1 SV=1	2	1	1	1	1	0	1	1	1	1	1	0	1	1	1	1	1	0	1	1	1	1	4.5	4.5	4.5	21.695	198	198;346	6					5	0.0081825	2.0626	By MS/MS		By MS/MS	By MS/MS	By MS/MS	By MS/MS
A0A286YDP0;O35648	A0A286YDP0;O35648	2;2	2;2	2;2	Centrin-3	Cetn3	tr|A0A286YDP0|A0A286YDP0_MOUSE Centrin-3 (Fragment) OS=Mus musculus OX=10090 GN=Cetn3 PE=1 SV=1;sp|O35648|CETN3_MOUSE Centrin-3 OS=Mus musculus OX=10090 GN=Cetn3 PE=1 SV=1	2	2	2	2	2	2	2	2	2	2	2	2	2	2	2	2	2	2	2	2	2	2	14.6	14.6	14.6	15.839	137	137;167	3.12	5	6	13			0	5.4811	By MS/MS	By MS/MS	By MS/MS	By MS/MS	By MS/MS	By MS/MS
A0A286YDQ6;B7ZP24;Q3UK78-2;Q3UK78	A0A286YDQ6;B7ZP24;Q3UK78-2;Q3UK78	1;1;1;1	1;1;1;1	1;1;1;1	Polycomb group RING finger protein 5	Pcgf5	tr|A0A286YDQ6|A0A286YDQ6_MOUSE Polycomb group RING finger protein 5 (Fragment) OS=Mus musculus OX=10090 GN=Pcgf5 PE=1 SV=1;tr|B7ZP24|B7ZP24_MOUSE Pcgf5 protein OS=Mus musculus OX=10090 GN=Pcgf5 PE=1 SV=1;sp|Q3UK78-2|PCGF5_MOUSE Isoform 2 of Polycomb group	4	1	1	1	0	0	1	1	1	0	0	0	1	1	1	0	0	0	1	1	1	0	9.6	9.6	9.6	14.633	125	125;255;236;256	4			3			0.00096544	3.4164			By MS/MS	By MS/MS	By MS/MS
A0A286YE10;A0A286YDZ5;Q9EP84;O70293;O70293-2;A0A286YDA5;Q8VEB1;O70291	A0A286YE10;A0A286YDZ5;Q9EP84;O70293;O70293-2;A0A286YDA5	5;5;5;5;5;4;2;1	5;5;5;5;5;4;2;1	5;5;5;5;5;4;2;1	G protein-coupled receptor kinase 6	Grk6	tr|A0A286YE10|A0A286YE10_MOUSE G protein-coupled receptor kinase OS=Mus musculus OX=10090 GN=Grk6 PE=1 SV=1;tr|A0A286YDZ5|A0A286YDZ5_MOUSE G protein-coupled receptor kinase OS=Mus musculus OX=10090 GN=Grk6 PE=1 SV=1;tr|Q9EP84|Q9EP84_MOUSE G protein-coupled	8	5	5	5	3	3	3	4	3	2	3	3	3	4	3	2	3	3	3	4	3	2	11.4	11.4	11.4	62.18	542	542;557;560;576;589;584;590;574	4.48		6	5	7	5	0	11.634	By MS/MS	By MS/MS	By MS/MS	By MS/MS	By MS/MS	By MS/MS
A0A286YE25;Q9QYY8-2;Q9QYY8;A0A3B2WC92;A0A286YCJ4;A0A3B2WBA7	A0A286YE25;Q9QYY8-2;Q9QYY8;A0A3B2WC92	5;5;5;4;2;1	5;5;5;4;2;1	5;5;5;4;2;1	Spastin	Spast	tr|A0A286YE25|A0A286YE25_MOUSE Spastin OS=Mus musculus OX=10090 GN=Spast PE=1 SV=1;sp|Q9QYY8-2|SPAST_MOUSE Isoform 2 of Spastin OS=Mus musculus OX=10090 GN=Spast;sp|Q9QYY8|SPAST_MOUSE Spastin OS=Mus musculus OX=10090 GN=Spast PE=1 SV=3;tr|A0A3B2WC92|A0A3B2	6	5	5	5	5	4	4	5	4	5	5	4	4	5	4	5	5	4	4	5	4	5	10.1	10.1	10.1	66.384	613	613;530;614;581;300;191	4.61		9		12	7	0	10.85	By MS/MS	By MS/MS	By MS/MS	By MS/MS	By MS/MS	By MS/MS
A0A286YE27;Q3U2K0-3;Q3U2K0-2;Q3U2K0;A0A286YDY1	A0A286YE27;Q3U2K0-3;Q3U2K0-2;Q3U2K0	3;3;3;3;1	3;3;3;3;1	3;3;3;3;1	Protein FAM193B	Fam193b	tr|A0A286YE27|A0A286YE27_MOUSE Protein FAM193B OS=Mus musculus OX=10090 GN=Fam193b PE=1 SV=2;sp|Q3U2K0-3|F193B_MOUSE Isoform 3 of Protein FAM193B OS=Mus musculus OX=10090 GN=Fam193b;sp|Q3U2K0-2|F193B_MOUSE Isoform 2 of Protein FAM193B OS=Mus musculus OX=10	5	3	3	3	2	3	2	3	2	2	2	3	2	3	2	2	2	3	2	3	2	2	5.2	5.2	5.2	86.073	812	812;443;778;892;242	4.93		1	5	3	6	0	16.012	By MS/MS	By MS/MS	By MS/MS	By MS/MS	By MS/MS	By MS/MS
A0A286YE31;P52482;H3BL23;H3BL69	A0A286YE31;P52482;H3BL23;H3BL69	2;2;1;1	2;2;1;1	1;1;0;0	Ubiquitin-conjugating enzyme E2 E1	Ube2e1;Ube2e2	tr|A0A286YE31|A0A286YE31_MOUSE Ubiquitin-conjugating enzyme E2 E1 (Fragment) OS=Mus musculus OX=10090 GN=Ube2e1 PE=1 SV=1;sp|P52482|UB2E1_MOUSE Ubiquitin-conjugating enzyme E2 E1 OS=Mus musculus OX=10090 GN=Ube2e1 PE=1 SV=1;tr|H3BL23|H3BL23_MOUSE Ubiquitin	4	2	2	1	2	2	2	2	2	2	2	2	2	2	2	2	1	1	1	1	1	1	19.6	19.6	12.2	16.42	148	148;193;146;167	3.06	2	10	5			0	19.708	By MS/MS	By MS/MS	By MS/MS	By MS/MS	By MS/MS	By MS/MS
Q07076;A0A2C9F2D2;A0A286YCW4	Q07076;A0A2C9F2D2	12;12;2	12;12;2	12;12;2	Annexin A7	Anxa7	sp|Q07076|ANXA7_MOUSE Annexin A7 OS=Mus musculus OX=10090 GN=Anxa7 PE=1 SV=2;tr|A0A2C9F2D2|A0A2C9F2D2_MOUSE Annexin OS=Mus musculus OX=10090 GN=Anxa7 PE=1 SV=1	3	12	12	12	12	12	10	11	11	11	12	12	10	11	11	11	12	12	10	11	11	11	29.4	29.4	29.4	49.925	463	463;485;72	3.58	56	7	19	45	32	0	134.85	By MS/MS	By MS/MS	By MS/MS	By MS/MS	By MS/MS	By MS/MS
P83882;A0A2I3BPG9;A0A0A6YW33	P83882;A0A2I3BPG9	5;5;1	5;5;1	5;5;1	60S ribosomal protein L36a	Rpl36a	sp|P83882|RL36A_MOUSE 60S ribosomal protein L36a OS=Mus musculus OX=10090 GN=Rpl36a PE=3 SV=2;tr|A0A2I3BPG9|A0A2I3BPG9_MOUSE MCG113838 OS=Mus musculus OX=10090 GN=Rpl36a-ps1 PE=3 SV=1	3	5	5	5	5	4	4	4	3	4	5	4	4	4	3	4	5	4	4	4	3	4	21.7	21.7	21.7	12.441	106	106;106;106	2.26	20	9	6	3		0	12.167	By MS/MS	By MS/MS	By MS/MS	By MS/MS	By MS/MS	By MS/MS
A0A2I3BPI4;Q80U38	A0A2I3BPI4;Q80U38	2;2	2;2	2;2	Protein KHNYN	Khnyn	tr|A0A2I3BPI4|A0A2I3BPI4_MOUSE Protein KHNYN OS=Mus musculus OX=10090 GN=Khnyn PE=1 SV=1;sp|Q80U38|KHNYN_MOUSE Protein KHNYN OS=Mus musculus OX=10090 GN=Khnyn PE=2 SV=2	2	2	2	2	2	0	0	0	1	0	2	0	0	0	1	0	2	0	0	0	1	0	4.7	4.7	4.7	61.265	555	555;671	4		2			1	0.0015032	3.0557	By MS/MS				By MS/MS
A0A2I3BPN6;E9QAP7	A0A2I3BPN6;E9QAP7	6;6	6;6	6;6		Taf4a	tr|A0A2I3BPN6|A0A2I3BPN6_MOUSE TATA-box-binding protein-associated factor 4 OS=Mus musculus OX=10090 GN=Taf4 PE=1 SV=1;tr|E9QAP7|E9QAP7_MOUSE TATA-box-binding protein-associated factor 4 OS=Mus musculus OX=10090 GN=Taf4 PE=1 SV=1	2	6	6	6	5	5	5	4	4	4	5	5	5	4	4	4	5	5	5	4	4	4	6.7	6.7	6.7	104.16	1030	1030;1042	4.44		7	15	5	9	0	17.916	By MS/MS	By MS/MS	By MS/MS	By MS/MS	By MS/MS	By MS/MS
A0A2I3BRT5;Q7TT21;A0A2I3BPP1;Q3UHB2;Q61037-4;Q61037-3;Q61037-2;Q61037-6;Q61037-5;Q61037;A0A2I3BPR7;Q3TQ10;A0A2I3BPE9;Q61037-7	A0A2I3BRT5;Q7TT21;A0A2I3BPP1;Q3UHB2;Q61037-4;Q61037-3;Q61037-2;Q61037-6;Q61037-5;Q61037;A0A2I3BPR7;Q3TQ10;A0A2I3BPE9;Q61037-7	2;2;2;2;2;2;2;2;2;2;1;1;1;1	2;2;2;2;2;2;2;2;2;2;1;1;1;1	2;2;2;2;2;2;2;2;2;2;1;1;1;1	Tuberin	Tsc2	tr|A0A2I3BRT5|A0A2I3BRT5_MOUSE Tuberin OS=Mus musculus OX=10090 GN=Tsc2 PE=1 SV=1;tr|Q7TT21|Q7TT21_MOUSE Tuberin OS=Mus musculus OX=10090 GN=Tsc2 PE=1 SV=1;tr|A0A2I3BPP1|A0A2I3BPP1_MOUSE Tuberin OS=Mus musculus OX=10090 GN=Tsc2 PE=1 SV=1;tr|Q3UHB2|Q3UHB2_M	14	2	2	2	1	1	1	1	0	0	1	1	1	1	0	0	1	1	1	1	0	0	1.5	1.5	1.5	194.01	1741	1741;1742;1785;1808;1770;1775;1777;1786;1791;1814;97;237;1359;1704	4			4			0.0028928	2.5856	By MS/MS	By MS/MS	By MS/MS	By MS/MS
E9Q784;A0A2I3BPQ5	E9Q784;A0A2I3BPQ5	8;8	8;8	8;8		Zc3h13	sp|E9Q784|ZC3HD_MOUSE Zinc finger CCCH domain-containing protein 13 OS=Mus musculus OX=10090 GN=Zc3h13 PE=1 SV=1;tr|A0A2I3BPQ5|A0A2I3BPQ5_MOUSE Zinc finger CCCH domain-containing protein 13 OS=Mus musculus OX=10090 GN=Zc3h13 PE=1 SV=1	2	8	8	8	3	5	6	4	4	2	3	5	6	4	4	2	3	5	6	4	4	2	4.7	4.7	4.7	203.75	1729	1729;1730	4.27	2	1	9	14		0	13.844	By MS/MS	By MS/MS	By MS/MS	By MS/MS	By MS/MS	By MS/MS
A0A2I3BPW0;Q9QYG0-2;Q9QYG0;A0A2I3BS20;A0A2I3BQM5;A0A2I3BPL1;A0A2I3BQR5	A0A2I3BPW0;Q9QYG0-2;Q9QYG0;A0A2I3BS20;A0A2I3BQM5;A0A2I3BPL1;A0A2I3BQR5	2;2;2;1;1;1;1	2;2;2;1;1;1;1	2;2;2;1;1;1;1	Protein NDRG2	Ndrg2	tr|A0A2I3BPW0|A0A2I3BPW0_MOUSE Protein NDRG2 (Fragment) OS=Mus musculus OX=10090 GN=Ndrg2 PE=1 SV=1;sp|Q9QYG0-2|NDRG2_MOUSE Isoform 2 of Protein NDRG2 OS=Mus musculus OX=10090 GN=Ndrg2;sp|Q9QYG0|NDRG2_MOUSE Protein NDRG2 OS=Mus musculus OX=10090 GN=Ndrg2 P	7	2	2	2	1	1	2	1	1	1	1	1	2	1	1	1	1	1	2	1	1	1	8.1	8.1	8.1	30.489	273	273;357;371;114;114;176;238	4			7			0.00060314	4.034	By MS/MS	By MS/MS	By MS/MS	By MS/MS	By MS/MS	By MS/MS
A0A2I3BPY7;Q9EP71	A0A2I3BPY7;Q9EP71	16;16	16;16	16;16	Ankycorbin	Rai14	tr|A0A2I3BPY7|A0A2I3BPY7_MOUSE Ankycorbin OS=Mus musculus OX=10090 GN=Rai14 PE=1 SV=1;sp|Q9EP71|RAI14_MOUSE Ankycorbin OS=Mus musculus OX=10090 GN=Rai14 PE=1 SV=1	2	16	16	16	14	10	15	13	14	12	14	10	15	13	14	12	14	10	15	13	14	12	19.4	19.4	19.4	105.71	950	950;979	3.3	35	37	24	36	5	0	85.104	By MS/MS	By MS/MS	By MS/MS	By MS/MS	By MS/MS	By MS/MS
A0A2I3BQ07;Q505D1;A0A2I3BQJ1;A0A2I3BRN1	A0A2I3BQ07;Q505D1;A0A2I3BQJ1	13;13;11;2	13;13;11;2	13;13;11;2	Serine/threonine-protein phosphatase 6 regulatory ankyrin repeat subunit A	Ankrd28	tr|A0A2I3BQ07|A0A2I3BQ07_MOUSE Serine/threonine-protein phosphatase 6 regulatory ankyrin repeat subunit A OS=Mus musculus OX=10090 GN=Ankrd28 PE=1 SV=1;sp|Q505D1|ANR28_MOUSE Serine/threonine-protein phosphatase 6 regulatory ankyrin repeat subunit A OS=Mus	4	13	13	13	10	8	9	9	7	10	10	8	9	9	7	10	10	8	9	9	7	10	18.6	18.6	18.6	116.03	1083	1083;1053;899;185	4.32	15	13	6	2	40	0	160.84	By MS/MS	By MS/MS	By MS/MS	By MS/MS	By MS/MS	By MS/MS
A0A2I3BQ16;P62046	A0A2I3BQ16;P62046	3;3	2;2	2;2	Leucine-rich repeat and calponin homology domain-containing protein 1	Lrch1	tr|A0A2I3BQ16|A0A2I3BQ16_MOUSE Leucine-rich repeat and calponin homology domain-containing protein 1 OS=Mus musculus OX=10090 GN=Lrch1 PE=1 SV=1;sp|P62046|LRCH1_MOUSE Leucine-rich repeat and calponin homology domain-containing protein 1 OS=Mus musculus OX=	2	3	2	2	2	1	1	1	1	1	1	1	1	1	1	1	1	1	1	1	1	1	5.6	3.5	3.5	76.058	682	682;709	4.57			3	4		0.0096585	1.9623	By MS/MS	By MS/MS	By MS/MS	By matching	By matching	By matching
A0A2I3BQ54;A0A2I3BRX7;Q8BVH9-2;Q8BVH9-3;Q8BVH9;A0A2I3BQH6	A0A2I3BQ54;A0A2I3BRX7;Q8BVH9-2;Q8BVH9-3;Q8BVH9;A0A2I3BQH6	2;2;2;2;2;1	2;2;2;2;2;1	2;2;2;2;2;1	Methyltransferase-like protein 6	Mettl6	tr|A0A2I3BQ54|A0A2I3BQ54_MOUSE tRNA N(3)-methylcytidine methyltransferase METTL6 (Fragment) OS=Mus musculus OX=10090 GN=Mettl6 PE=1 SV=1;tr|A0A2I3BRX7|A0A2I3BRX7_MOUSE Methyltransferase-like protein OS=Mus musculus OX=10090 GN=Mettl6 PE=1 SV=1;sp|Q8BVH9-2|	6	2	2	2	2	2	2	2	2	1	2	2	2	2	2	1	2	2	2	2	2	1	8.1	8.1	8.1	21.905	186	186;255;232;237;282;78	6					11	0.0020416	2.8765	By MS/MS	By MS/MS	By MS/MS	By MS/MS	By MS/MS	By matching
A0A2I3BQE0;Q9JI10;Q9JI10-2	A0A2I3BQE0;Q9JI10;Q9JI10-2	7;7;6	5;5;4	5;5;4	Serine/threonine-protein kinase 3;Serine/threonine-protein kinase 3 36kDa subunit;Serine/threonine-protein kinase 3 20kDa subunit	Stk3	tr|A0A2I3BQE0|A0A2I3BQE0_MOUSE Serine/threonine-protein kinase 3 OS=Mus musculus OX=10090 GN=Stk3 PE=1 SV=1;sp|Q9JI10|STK3_MOUSE Serine/threonine-protein kinase 3 OS=Mus musculus OX=10090 GN=Stk3 PE=1 SV=1;sp|Q9JI10-2|STK3_MOUSE Isoform 2 of Serine/threoni	3	7	5	5	7	4	3	5	6	3	5	2	2	3	4	1	5	2	2	3	4	1	16	11.3	11.3	56.673	495	495;497;427	4.53			9	7	1	0	8.7222	By MS/MS	By MS/MS	By MS/MS	By MS/MS	By MS/MS	By MS/MS
A0A2I3BQJ3;Q8K072	A0A2I3BQJ3;Q8K072	3;3	3;3	3;3	Receptor expression-enhancing protein 4	Reep4	tr|A0A2I3BQJ3|A0A2I3BQJ3_MOUSE Receptor expression-enhancing protein OS=Mus musculus OX=10090 GN=Reep4 PE=1 SV=1;sp|Q8K072|REEP4_MOUSE Receptor expression-enhancing protein 4 OS=Mus musculus OX=10090 GN=Reep4 PE=1 SV=1	2	3	3	3	3	1	2	2	2	1	3	1	2	2	2	1	3	1	2	2	2	1	13.7	13.7	13.7	33.793	293	293;257	2.71	4	12			1	0	6.4486	By MS/MS	By matching	By MS/MS	By MS/MS	By MS/MS	By MS/MS
A0A2I3BQL6;Q8BUR9	A0A2I3BQL6;Q8BUR9	1;1	1;1	1;1	Mitotic-spindle organizing protein 1	Mzt1	tr|A0A2I3BQL6|A0A2I3BQL6_MOUSE Mitotic-spindle organizing protein 1 OS=Mus musculus OX=10090 GN=Mzt1 PE=1 SV=1;sp|Q8BUR9|MZT1_MOUSE Mitotic-spindle organizing protein 1 OS=Mus musculus OX=10090 GN=Mzt1 PE=1 SV=1	2	1	1	1	1	1	1	1	1	1	1	1	1	1	1	1	1	1	1	1	1	1	39	39	39	4.4341	41	41;78	4			6			0	7.366	By MS/MS	By MS/MS	By MS/MS	By MS/MS	By MS/MS	By MS/MS
Q923T9-3;A0A2I3BQP6;Q923T9;Q923T9-2;A0A286YDL6;A0A286YCW8;A0A286YCB8;Q5SVI9;P28652;Q5SVJ1;Q5SVI0;Q5SVI3;Q5SVI2;A0A286YCH4;P11798;F8WIS9;A0A286YDK9;A0A286YCI7	Q923T9-3;A0A2I3BQP6;Q923T9;Q923T9-2;A0A286YDL6;A0A286YCW8	6;6;6;6;3;3;2;2;2;2;2;2;2;1;1;1;1;1	6;6;6;6;3;3;2;2;2;2;2;2;2;1;1;1;1;1	4;4;4;4;1;2;0;0;0;0;0;0;0;1;0;0;0;1	Calcium/calmodulin-dependent protein kinase type II subunit gamma	Camk2g	sp|Q923T9-3|KCC2G_MOUSE Isoform 3 of Calcium/calmodulin-dependent protein kinase type II subunit gamma OS=Mus musculus OX=10090 GN=Camk2g;tr|A0A2I3BQP6|A0A2I3BQP6_MOUSE Calcium/calmodulin-dependent protein kinase type II subunit gamma OS=Mus musculus OX=10	18	6	6	4	6	6	6	5	5	6	6	6	6	5	5	6	4	4	4	3	3	4	18.2	18.2	11.7	55.96	495	495;565;529;518;241;274;224;479;542;503;518;518;529;190;478;489;168;71	3.78	16	6	13	5	18	0	29.046	By MS/MS	By MS/MS	By MS/MS	By MS/MS	By MS/MS	By MS/MS
A0A2I3BQS6;E9Q2H1;Q80TP3	A0A2I3BQS6;E9Q2H1;Q80TP3	28;28;27	28;28;27	28;28;27	E3 ubiquitin-protein ligase UBR5	Ubr5	tr|A0A2I3BQS6|A0A2I3BQS6_MOUSE E3 ubiquitin-protein ligase UBR5 OS=Mus musculus OX=10090 GN=Ubr5 PE=1 SV=1;tr|E9Q2H1|E9Q2H1_MOUSE E3 ubiquitin-protein ligase UBR5 OS=Mus musculus OX=10090 GN=Ubr5 PE=1 SV=2;sp|Q80TP3|UBR5_MOUSE E3 ubiquitin-protein ligase U	3	28	28	28	20	20	20	20	18	17	20	20	20	20	18	17	20	20	20	20	18	17	11.7	11.7	11.7	308.96	2798	2798;2792;2792	4.04	42	19	8	49	51	0	89.84	By MS/MS	By MS/MS	By MS/MS	By MS/MS	By MS/MS	By MS/MS
E9PZM7;A0A2I3BQU5;A0A2I3BRQ7	E9PZM7;A0A2I3BQU5;A0A2I3BRQ7	7;7;5	7;7;5	7;7;5		Scaf11	tr|E9PZM7|E9PZM7_MOUSE SR-related CTD-associated factor 11 OS=Mus musculus OX=10090 GN=Scaf11 PE=1 SV=1;tr|A0A2I3BQU5|A0A2I3BQU5_MOUSE SR-related CTD-associated factor 11 OS=Mus musculus OX=10090 GN=Scaf11 PE=1 SV=1;tr|A0A2I3BRQ7|A0A2I3BRQ7_MOUSE SR-relate	3	7	7	7	7	5	5	6	4	4	7	5	5	6	4	4	7	5	5	6	4	4	6.7	6.7	6.7	162.1	1456	1456;1389;476	3.26	11	14	15	10		0	23.516	By MS/MS	By MS/MS	By MS/MS	By MS/MS	By MS/MS	By MS/MS
A0A2I3BQV4;Q9QX96	A0A2I3BQV4;Q9QX96	2;2	1;1	1;1	Sal-like protein 2	Sall2	tr|A0A2I3BQV4|A0A2I3BQV4_MOUSE Sal-like protein 2 OS=Mus musculus OX=10090 GN=Sall2 PE=1 SV=1;sp|Q9QX96|SALL2_MOUSE Sal-like protein 2 OS=Mus musculus OX=10090 GN=Sall2 PE=1 SV=2	2	2	1	1	2	1	1	1	1	0	1	1	1	1	1	0	1	1	1	1	1	0	3.3	2	2	104.34	1002	1002;1004	4			5			0	6.7938	By MS/MS	By MS/MS	By MS/MS	By MS/MS	By MS/MS
A0A2I3BQW0;P59598	A0A2I3BQW0;P59598	1;1	1;1	1;1	Putative Polycomb group protein ASXL1	Asxl1	tr|A0A2I3BQW0|A0A2I3BQW0_MOUSE Polycomb group protein ASXL1 OS=Mus musculus OX=10090 GN=Asxl1 PE=1 SV=1;sp|P59598|ASXL1_MOUSE Polycomb group protein ASXL1 OS=Mus musculus OX=10090 GN=Asxl1 PE=1 SV=1	2	1	1	1	1	0	0	0	0	0	1	0	0	0	0	0	1	0	0	0	0	0	0.9	0.9	0.9	162.52	1513	1513;1514	4			1			0.00095456	3.2677	By MS/MS
A0A2I3BQW1;Q8BFT2	A0A2I3BQW1;Q8BFT2	2;2	2;2	2;2	HAUS augmin-like complex subunit 4	Haus4	tr|A0A2I3BQW1|A0A2I3BQW1_MOUSE HAUS augmin-like complex subunit 4 (Fragment) OS=Mus musculus OX=10090 GN=Haus4 PE=1 SV=1;sp|Q8BFT2|HAUS4_MOUSE HAUS augmin-like complex subunit 4 OS=Mus musculus OX=10090 GN=Haus4 PE=1 SV=1	2	2	2	2	0	2	0	1	1	2	0	2	0	1	1	2	0	2	0	1	1	2	10.3	10.3	10.3	24.49	214	214;363	5.33			2		4	0.00041246	4.5259		By matching		By matching	By MS/MS	By MS/MS
A0A2I3BR81;Q91X76;A0A2I3BQR1;A0A2I3BRL0	A0A2I3BR81;Q91X76;A0A2I3BQR1;A0A2I3BRL0	2;1;1;1	2;1;1;1	2;1;1;1		Nt5dc2	tr|A0A2I3BR81|A0A2I3BR81_MOUSE 5-nucleotidase domain-containing 2 OS=Mus musculus OX=10090 GN=Nt5dc2 PE=1 SV=1;tr|Q91X76|Q91X76_MOUSE 5-nucleotidase domain-containing 2 OS=Mus musculus OX=10090 GN=Nt5dc2 PE=1 SV=1;tr|A0A2I3BQR1|A0A2I3BQR1_MOUSE 5-nucleo	4	2	2	2	1	1	1	1	1	2	1	1	1	1	1	2	1	1	1	1	1	2	4.9	4.9	4.9	63.858	553	553;390;464;493	4.57	8				20	0	7.8982	By MS/MS	By MS/MS	By MS/MS	By MS/MS	By MS/MS	By MS/MS
A0A2I3BR95;Q61097;A0A140LHS5;Q5SXE4;Q61097-2	A0A2I3BR95;Q61097;A0A140LHS5;Q5SXE4;Q61097-2	2;2;1;1;1	2;2;1;1;1	2;2;1;1;1	Kinase suppressor of Ras 1	Ksr1	tr|A0A2I3BR95|A0A2I3BR95_MOUSE Kinase suppressor of Ras 1 OS=Mus musculus OX=10090 GN=Ksr1 PE=1 SV=1;sp|Q61097|KSR1_MOUSE Kinase suppressor of Ras 1 OS=Mus musculus OX=10090 GN=Ksr1 PE=1 SV=1;tr|A0A140LHS5|A0A140LHS5_MOUSE Kinase suppressor of Ras 1 (Fragm	5	2	2	2	1	1	1	1	2	1	1	1	1	1	2	1	1	1	1	1	2	1	2.4	2.4	2.4	91.337	818	818;873;432;637;863	6					7	0.0063403	2.2174	By MS/MS	By matching	By MS/MS	By MS/MS	By MS/MS	By matching
A0A2I3BRD1;Q8K0F1-2;Q8K0F1;A0A2I3BPS3	A0A2I3BRD1;Q8K0F1-2;Q8K0F1;A0A2I3BPS3	4;4;4;2	4;4;4;2	4;4;4;2	TBC1 domain family member 23	Tbc1d23	tr|A0A2I3BRD1|A0A2I3BRD1_MOUSE TBC1 domain family member 23 OS=Mus musculus OX=10090 GN=Tbc1d23 PE=1 SV=1;sp|Q8K0F1-2|TBC23_MOUSE Isoform 2 of TBC1 domain family member 23 OS=Mus musculus OX=10090 GN=Tbc1d23;sp|Q8K0F1|TBC23_MOUSE TBC1 domain family member	4	4	4	4	1	2	2	3	2	1	1	2	2	3	2	1	1	2	2	3	2	1	7.6	7.6	7.6	78.246	699	699;203;684;97	5.09		3		1	7	0	10.065	By MS/MS	By MS/MS	By MS/MS	By MS/MS	By MS/MS	By MS/MS
A0A2I3BRJ4;Q8BGC1-2;Q8BGC1	A0A2I3BRJ4;Q8BGC1-2;Q8BGC1	3;3;3	3;3;3	3;3;3	UPF0489 protein C5orf22 homolog		tr|A0A2I3BRJ4|A0A2I3BRJ4_MOUSE RIKEN cDNA 6030458C11 gene OS=Mus musculus OX=10090 GN=6030458C11Rik PE=1 SV=1;sp|Q8BGC1-2|CE022_MOUSE Isoform 2 of UPF0489 protein C5orf22 homolog OS=Mus musculus OX=10090;sp|Q8BGC1|CE022_MOUSE UPF0489 protein C5orf22 homolo	3	3	3	3	3	2	2	2	1	1	3	2	2	2	1	1	3	2	2	2	1	1	13.1	13.1	13.1	39.802	358	358;341;442	4.75	1		5		6	0	6.9226	By MS/MS	By MS/MS	By MS/MS	By MS/MS	By MS/MS	By MS/MS
A0A2I3BRK6;Q9JIX0;A0A2I3BRR5;A0A2I3BQK0	A0A2I3BRK6;Q9JIX0	4;4;1;1	4;4;1;1	4;4;1;1	Transcription and mRNA export factor ENY2	Eny2	tr|A0A2I3BRK6|A0A2I3BRK6_MOUSE Transcription and mRNA export factor ENY2 OS=Mus musculus OX=10090 GN=Eny2 PE=1 SV=1;sp|Q9JIX0|ENY2_MOUSE Transcription and mRNA export factor ENY2 OS=Mus musculus OX=10090 GN=Eny2 PE=1 SV=1	4	4	4	4	3	3	4	3	3	3	3	3	4	3	3	3	3	3	4	3	3	3	36.5	36.5	36.5	10.984	96	96;101;53;56	3.94	11		1	11	10	0	63.717	By MS/MS	By MS/MS	By MS/MS	By MS/MS	By MS/MS	By MS/MS
A0A2I3BRL8;Q91VM5;A0A2I3BQC0;S4R1F6	A0A2I3BRL8;Q91VM5	10;10;4;1	10;10;4;1	2;2;0;0	RNA binding motif protein, X-linked-like-1	Rbmxl1	tr|A0A2I3BRL8|A0A2I3BRL8_MOUSE Predicted gene 7324 OS=Mus musculus OX=10090 GN=Gm7324 PE=4 SV=1;sp|Q91VM5|RMXL1_MOUSE RNA binding motif protein, X-linked-like-1 OS=Mus musculus OX=10090 GN=Rbmxl1 PE=2 SV=1	4	10	10	2	9	8	9	9	8	8	9	8	9	9	8	8	2	2	2	2	1	1	27.3	27.3	8.5	42.178	388	388;388;30;263	3.5	58	5	25	38	31	0	104.63	By MS/MS	By MS/MS	By MS/MS	By MS/MS	By MS/MS	By MS/MS
A0A2I3BRS9;Q8BH93	A0A2I3BRS9;Q8BH93	1;1	1;1	1;1	MAPK-interacting and spindle-stabilizing protein-like	Mapk1ip1l	tr|A0A2I3BRS9|A0A2I3BRS9_MOUSE MAPK-interacting and spindle-stabilizing protein-like (Fragment) OS=Mus musculus OX=10090 GN=Mapk1ip1l PE=1 SV=1;sp|Q8BH93|MISSL_MOUSE MAPK-interacting and spindle-stabilizing protein-like OS=Mus musculus OX=10090 GN=Mapk1ip1	2	1	1	1	1	1	1	1	1	1	1	1	1	1	1	1	1	1	1	1	1	1	18	18	18	13.698	139	139;242	2.33	6	12				0	44.963	By MS/MS	By MS/MS	By MS/MS	By MS/MS	By MS/MS	By MS/MS
A0A2I3BRT4;Q8R0W0	A0A2I3BRT4;Q8R0W0	18;18	17;17	17;17	Epiplakin	Eppk1	tr|A0A2I3BRT4|A0A2I3BRT4_MOUSE Epiplakin OS=Mus musculus OX=10090 GN=Eppk1 PE=1 SV=1;sp|Q8R0W0|EPIPL_MOUSE Epiplakin OS=Mus musculus OX=10090 GN=Eppk1 PE=1 SV=2	2	18	17	17	9	10	11	16	10	9	9	10	11	15	10	9	9	10	11	15	10	9	10.7	9.6	9.6	381.72	3458	3458;6548	4.4	18	9	14	39	35	0	210.69	By MS/MS	By MS/MS	By MS/MS	By MS/MS	By MS/MS	By MS/MS
A0A2I3BRW0;Q9D958;A0A2I3BQG3	A0A2I3BRW0;Q9D958	3;2;1	3;2;1	3;2;1	Signal peptidase complex subunit 1	Spcs1	tr|A0A2I3BRW0|A0A2I3BRW0_MOUSE Signal peptidase complex subunit 1 OS=Mus musculus OX=10090 GN=Spcs1 PE=1 SV=1;sp|Q9D958|SPCS1_MOUSE Signal peptidase complex subunit 1 OS=Mus musculus OX=10090 GN=Spcs1 PE=2 SV=3	3	3	3	3	3	3	3	3	3	3	3	3	3	3	3	3	3	3	3	3	3	3	27.5	27.5	27.5	11.777	102	102;161;134	4.17	12		6	12	16	0	12.599	By MS/MS	By MS/MS	By MS/MS	By MS/MS	By MS/MS	By MS/MS
A0A2I3BS18;Q91VT1;Q91VT1-2	A0A2I3BS18;Q91VT1	5;5;2	5;5;2	5;5;2	E3 SUMO-protein ligase NSE2	Nsmce2	tr|A0A2I3BS18|A0A2I3BS18_MOUSE E3 SUMO-protein ligase NSE2 OS=Mus musculus OX=10090 GN=Nsmce2 PE=1 SV=1;sp|Q91VT1|NSE2_MOUSE E3 SUMO-protein ligase NSE2 OS=Mus musculus OX=10090 GN=Nsmce2 PE=2 SV=1	3	5	5	5	4	2	3	2	1	2	4	2	3	2	1	2	4	2	3	2	1	2	14.3	14.3	14.3	31.133	273	273;247;139	4.87			3	11	1	0	10.154	By MS/MS	By MS/MS	By MS/MS	By MS/MS	By MS/MS	By MS/MS
A0A2I3BS49;Q9CXU4;Q9WTQ8	A0A2I3BS49;Q9CXU4;Q9WTQ8	2;2;2	2;2;2	2;2;2	Mitochondrial import inner membrane translocase subunit Tim23	Timm23	tr|A0A2I3BS49|A0A2I3BS49_MOUSE Mitochondrial import inner membrane translocase subunit Tim23 OS=Mus musculus OX=10090 GN=Timm23 PE=1 SV=1;tr|Q9CXU4|Q9CXU4_MOUSE Mitochondrial import inner membrane translocase subunit TIM23 OS=Mus musculus OX=10090 GN=Timm2	3	2	2	2	1	1	2	1	1	1	1	1	2	1	1	1	1	1	2	1	1	1	19.8	19.8	19.8	20.749	197	197;209;209	2.71	6	1	6	1		0	23.479	By MS/MS	By MS/MS	By MS/MS	By MS/MS	By MS/MS	By MS/MS
Q6PIP5;A0A2K6EDK3;A0A2I3BQP7	Q6PIP5;A0A2K6EDK3	11;11;1	11;11;1	11;11;1	NudC domain-containing protein 1	Nudcd1	sp|Q6PIP5|NUDC1_MOUSE NudC domain-containing protein 1 OS=Mus musculus OX=10090 GN=Nudcd1 PE=1 SV=2;tr|A0A2K6EDK3|A0A2K6EDK3_MOUSE NudC domain-containing protein 1 OS=Mus musculus OX=10090 GN=Nudcd1 PE=1 SV=1	3	11	11	11	9	9	10	10	9	7	9	9	10	10	9	7	9	9	10	10	9	7	29.4	29.4	29.4	66.704	582	582;581;43	3.28	41	10	15	10	25	0	66.367	By MS/MS	By MS/MS	By MS/MS	By MS/MS	By MS/MS	By MS/MS
A0A2K6EDM5;Q8C181;Q8C181-4;Q8C181-3;Q8C181-2;A0A0A6YXP3;A0A0A6YXE3;A0A0A6YWB0;G3X9Q0;A0A0A6YVV8;Q9JKP5;S4R267;Q8R003	A0A2K6EDM5;Q8C181;Q8C181-4;Q8C181-3;Q8C181-2;A0A0A6YXP3;A0A0A6YXE3;A0A0A6YWB0;G3X9Q0;A0A0A6YVV8;Q9JKP5	4;4;4;3;3;2;2;2;2;2;2;1;1	4;4;4;3;3;2;2;2;2;2;2;1;1	4;4;4;3;3;2;2;2;2;2;2;1;1	Muscleblind-like protein 2;Muscleblind-like protein 1	Mbnl2;Mbnl1	tr|A0A2K6EDM5|A0A2K6EDM5_MOUSE Muscleblind-like protein 2 OS=Mus musculus OX=10090 GN=Mbnl2 PE=1 SV=1;sp|Q8C181|MBNL2_MOUSE Muscleblind-like protein 2 OS=Mus musculus OX=10090 GN=Mbnl2 PE=2 SV=2;sp|Q8C181-4|MBNL2_MOUSE Isoform 4 of Muscleblind-like protein	13	4	4	4	3	3	2	3	2	2	3	3	2	3	2	2	3	3	2	3	2	2	14.8	14.8	14.8	41.317	385	385;373;379;333;355;182;302;347;381;387;341;332;342	3.39	8	2	6	2	5	0	19.44	By MS/MS	By MS/MS	By MS/MS	By MS/MS	By MS/MS	By MS/MS
A0A2R8VHF9;E9QPE7;A0A338P6K2;O08638-2;O08638;A2AQP0	A0A2R8VHF9;E9QPE7;A0A338P6K2;O08638-2;O08638	16;16;16;15;15;1	2;2;2;2;2;0	2;2;2;2;2;0	Myosin-11	Myh11	tr|A0A2R8VHF9|A0A2R8VHF9_MOUSE Myosin-11 OS=Mus musculus OX=10090 GN=Myh11 PE=1 SV=1;tr|E9QPE7|E9QPE7_MOUSE Myosin-11 OS=Mus musculus OX=10090 GN=Myh11 PE=1 SV=2;tr|A0A338P6K2|A0A338P6K2_MOUSE Myosin-11 OS=Mus musculus OX=10090 GN=Myh11 PE=1 SV=1;sp|O08638	6	16	2	2	15	14	12	16	11	14	2	2	1	2	1	1	2	2	1	2	1	1	7.1	0.8	0.8	223.35	1938	1938;1972;1979;1938;1972;1941	3.56	5		6	2	3	0.0025538	2.6863	By MS/MS	By MS/MS	By MS/MS	By MS/MS	By MS/MS	By MS/MS
A0A2R8VHH1;Q99P88	A0A2R8VHH1;Q99P88	20;20	20;20	20;20	Nuclear pore complex protein Nup155	Nup155	tr|A0A2R8VHH1|A0A2R8VHH1_MOUSE Nuclear pore complex protein Nup155 OS=Mus musculus OX=10090 GN=Nup155 PE=1 SV=1;sp|Q99P88|NU155_MOUSE Nuclear pore complex protein Nup155 OS=Mus musculus OX=10090 GN=Nup155 PE=1 SV=1	2	20	20	20	14	14	15	17	9	16	14	14	15	17	9	16	14	14	15	17	9	16	19.3	19.3	19.3	150.14	1346	1346;1391	4.17	26	6	23	27	39	0	163.96	By MS/MS	By MS/MS	By MS/MS	By MS/MS	By MS/MS	By MS/MS
Q9D0P8;A0A2R8VHI2;A0A2R8VI57	Q9D0P8;A0A2R8VHI2;A0A2R8VI57	2;2;1	2;2;1	2;2;1	Intraflagellar transport protein 27 homolog	Ift27	sp|Q9D0P8|IFT27_MOUSE Intraflagellar transport protein 27 homolog OS=Mus musculus OX=10090 GN=Ift27 PE=1 SV=1;tr|A0A2R8VHI2|A0A2R8VHI2_MOUSE Intraflagellar transport protein 27 homolog OS=Mus musculus OX=10090 GN=Ift27 PE=1 SV=1;tr|A0A2R8VI57|A0A2R8VI57_MO	3	2	2	2	1	1	2	2	2	2	1	1	2	2	2	2	1	1	2	2	2	2	9.1	9.1	9.1	20.814	186	186;163;99	5.13			4	5	6	0.00059441	3.7922	By MS/MS	By MS/MS	By MS/MS	By MS/MS	By MS/MS	By MS/MS
A0A2R8VHP9;Q3TT81;A0A2R8VKF0;A0A2R8VHL8;A0A2R8VHN3;A0A2R8VHI3	A0A2R8VHP9;Q3TT81;A0A2R8VKF0;A0A2R8VHL8;A0A2R8VHN3	17;16;13;12;11;5	12;11;9;9;6;2	0;0;0;0;0;0		Pcbp2	tr|A0A2R8VHP9|A0A2R8VHP9_MOUSE Poly(rC)-binding protein 2 OS=Mus musculus OX=10090 GN=Pcbp2 PE=1 SV=1;tr|Q3TT81|Q3TT81_MOUSE Poly(rC)-binding protein 2 OS=Mus musculus OX=10090 GN=Pcbp2 PE=1 SV=1;tr|A0A2R8VKF0|A0A2R8VKF0_MOUSE Poly(rC)-binding protein 2 (F	6	17	12	0	17	16	17	17	16	15	12	11	12	12	11	10	0	0	0	0	0	0	67.2	55.5	0	35.346	335	335;322;190;225;168;96	3.27	90	10	26	36	46	0	323.31	By MS/MS	By MS/MS	By MS/MS	By MS/MS	By MS/MS	By MS/MS
A0A2R8VHR7;A0A2R8W6V9;A0A571BE69;Q9Z1S5-2;Q9Z1S5	A0A2R8VHR7;A0A2R8W6V9;A0A571BE69;Q9Z1S5-2;Q9Z1S5	2;2;2;2;2	2;2;2;2;2	2;2;2;2;2	Neuronal-specific septin-3	2020-09-03	tr|A0A2R8VHR7|A0A2R8VHR7_MOUSE Septin 3 (Fragment) OS=Mus musculus OX=10090 GN=Sept3 PE=1 SV=1;tr|A0A2R8W6V9|A0A2R8W6V9_MOUSE Septin 3 OS=Mus musculus OX=10090 GN=Sept3 PE=1 SV=1;tr|A0A571BE69|A0A571BE69_MOUSE Septin 3 OS=Mus musculus OX=10090 GN=Sept3 PE=	5	2	2	2	1	2	1	2	1	1	1	2	1	2	1	1	1	2	1	2	1	1	9	9	9	23.06	201	201;341;822;337;350	3.53	6			7	2	0.00059536	3.8248	By MS/MS	By MS/MS	By MS/MS	By MS/MS	By MS/MS	By MS/MS
A0A2R8VHX5;Q8VD12-2;Q8VD12	A0A2R8VHX5;Q8VD12-2;Q8VD12	4;4;4	4;4;4	4;4;4	Zinc finger protein 385A	Znf385a	tr|A0A2R8VHX5|A0A2R8VHX5_MOUSE Zinc finger protein 385A OS=Mus musculus OX=10090 GN=Zfp385a PE=1 SV=1;sp|Q8VD12-2|Z385A_MOUSE Isoform 2 of Zinc finger protein 385A OS=Mus musculus OX=10090 GN=Znf385a;sp|Q8VD12|Z385A_MOUSE Zinc finger protein 385A OS=Mus mu	3	4	4	4	4	4	2	4	3	3	4	4	2	4	3	3	4	4	2	4	3	3	17	17	17	36.28	347	347;366;386	5.24		5		1	15	0	7.8005	By MS/MS	By MS/MS	By MS/MS	By MS/MS	By MS/MS	By MS/MS
H3BJI7;A0A2R8VI07;Q9D7S5;Q8C6B0;Q76I24;Q5I0W6;G3X9G9;Q76I26	H3BJI7;A0A2R8VI07;Q9D7S5;Q8C6B0;Q76I24;Q5I0W6;G3X9G9;Q76I26	1;1;1;1;1;1;1;1	1;1;1;1;1;1;1;1	1;1;1;1;1;1;1;1		Methig1;mCG_20149;Mettl7a1;UbiE2;Mettl7a2;Mettl7a3	tr|H3BJI7|H3BJI7_MOUSE Methyltransferase hypoxia-inducible domain-containing 1 OS=Mus musculus OX=10090 GN=Methig1 PE=4 SV=1;tr|A0A2R8VI07|A0A2R8VI07_MOUSE Methyltransferase-like 7A1 (Fragment) OS=Mus musculus OX=10090 GN=Mettl7a1 PE=1 SV=1;tr|Q9D7S5|Q9D7S	8	1	1	1	1	1	1	1	1	1	1	1	1	1	1	1	1	1	1	1	1	1	8.3	8.3	8.3	20.613	181	181;191;200;244;244;244;244;264	6					6	0	16.988	By MS/MS	By MS/MS	By MS/MS	By MS/MS	By MS/MS	By MS/MS
A0A2R8VI25	A0A2R8VI25	17	1	0			tr|A0A2R8VI25|A0A2R8VI25_MOUSE Poly(RC) binding protein 2, isoform CRA_d OS=Mus musculus OX=10090 GN=Pcbp2 PE=1 SV=1	1	17	1	0	17	16	17	17	16	15	1	1	1	1	1	1	0	0	0	0	0	0	65.5	4.7	0	33.299	316	316	5				6		0	12.835	By MS/MS	By MS/MS	By MS/MS	By MS/MS	By MS/MS	By MS/MS
A0A2R8VJU9;A0A2R8VI30;D3Z187;A0A2R8VI94;A0A2R8VK70;A0A2R8W6P0;Q61735;Q61735-2	A0A2R8VJU9;A0A2R8VI30;D3Z187;A0A2R8VI94;A0A2R8VK70;A0A2R8W6P0;Q61735;Q61735-2	1;1;1;1;1;1;1;1	1;1;1;1;1;1;1;1	1;1;1;1;1;1;1;1	Leukocyte surface antigen CD47	Cd47	tr|A0A2R8VJU9|A0A2R8VJU9_MOUSE Leukocyte surface antigen CD47 OS=Mus musculus OX=10090 GN=Cd47 PE=1 SV=1;tr|A0A2R8VI30|A0A2R8VI30_MOUSE Leukocyte surface antigen CD47 OS=Mus musculus OX=10090 GN=Cd47 PE=1 SV=1;tr|D3Z187|D3Z187_MOUSE Leukocyte surface antig	8	1	1	1	1	0	1	1	0	1	1	0	1	1	0	1	1	0	1	1	0	1	3.9	3.9	3.9	28.251	258	258;267;271;278;321;342;303;324	5				4		0.002545	2.6439	By matching		By MS/MS	By MS/MS		By MS/MS
A0A2R8W6P6;A0A2R8VI39;P23591;A0A2R8VHD0;A0A2R8VKL9;A0A2R8W6N0	A0A2R8W6P6;A0A2R8VI39;P23591;A0A2R8VHD0;A0A2R8VKL9	5;5;5;4;3;2	5;5;5;4;3;2	5;5;5;4;3;2	GDP-L-fucose synthase	Tsta3	tr|A0A2R8W6P6|A0A2R8W6P6_MOUSE GDP-L-fucose synthase OS=Mus musculus OX=10090 GN=Tsta3 PE=1 SV=1;tr|A0A2R8VI39|A0A2R8VI39_MOUSE GDP-L-fucose synthase OS=Mus musculus OX=10090 GN=Tsta3 PE=1 SV=1;sp|P23591|FCL_MOUSE GDP-L-fucose synthase OS=Mus musculus OX=1	6	5	5	5	4	4	4	4	4	5	4	4	4	4	4	5	4	4	4	4	4	5	22.9	22.9	22.9	36.071	327	327;351;321;292;128;62	3.35	15	6	5	11	6	0	48.679	By MS/MS	By MS/MS	By MS/MS	By MS/MS	By MS/MS	By MS/MS
A0A2R8VI72;Q8R0H9	A0A2R8VI72;Q8R0H9	2;2	2;2	2;2	ADP-ribosylation factor-binding protein GGA1	Gga1	tr|A0A2R8VI72|A0A2R8VI72_MOUSE ADP-ribosylation factor-binding protein GGA1 OS=Mus musculus OX=10090 GN=Gga1 PE=1 SV=1;sp|Q8R0H9|GGA1_MOUSE ADP-ribosylation factor-binding protein GGA1 OS=Mus musculus OX=10090 GN=Gga1 PE=1 SV=1	2	2	2	2	0	0	1	1	0	0	0	0	1	1	0	0	0	0	1	1	0	0	8.8	8.8	8.8	41.046	363	363;635	5			1		1	0	5.3664			By MS/MS	By MS/MS
A0A2R8VJW3;O55229	A0A2R8VJW3;O55229	1;1	1;1	1;1	Choline/ethanolamine kinase	Chkb	tr|A0A2R8VJW3|A0A2R8VJW3_MOUSE Predicted readthrough transcript (NMD candidate), 44502 OS=Mus musculus OX=10090 GN=Gm44502 PE=4 SV=1;sp|O55229|CHKB_MOUSE Choline/ethanolamine kinase OS=Mus musculus OX=10090 GN=Chkb PE=1 SV=3	2	1	1	1	1	0	1	1	1	1	1	0	1	1	1	1	1	0	1	1	1	1	10.6	10.6	10.6	19.619	180	180;394	3		5				0	5.2423	By MS/MS		By MS/MS	By MS/MS	By MS/MS	By matching
A0A2R8VK29;Q9D2C6	A0A2R8VK29;Q9D2C6	1;1	1;1	1;1	DNA-directed RNA polymerase III subunit RPC8	Polr3h	tr|A0A2R8VK29|A0A2R8VK29_MOUSE DNA-directed RNA polymerase III subunit RPC8 OS=Mus musculus OX=10090 GN=Polr3h PE=1 SV=1;sp|Q9D2C6|RPC8_MOUSE DNA-directed RNA polymerase III subunit RPC8 OS=Mus musculus OX=10090 GN=Polr3h PE=1 SV=2	2	1	1	1	1	1	1	1	1	1	1	1	1	1	1	1	1	1	1	1	1	1	6.3	6.3	6.3	19.628	175	175;204	4			6			0.00020781	4.6238	By MS/MS	By MS/MS	By MS/MS	By MS/MS	By MS/MS	By MS/MS
A0A2R8VK76;Q9EPU4	A0A2R8VK76;Q9EPU4	11;11	11;11	11;11	Cleavage and polyadenylation specificity factor subunit 1	Cpsf1	tr|A0A2R8VK76|A0A2R8VK76_MOUSE Cleavage and polyadenylation-specificity factor subunit 1 OS=Mus musculus OX=10090 GN=Cpsf1 PE=1 SV=1;sp|Q9EPU4|CPSF1_MOUSE Cleavage and polyadenylation specificity factor subunit 1 OS=Mus musculus OX=10090 GN=Cpsf1 PE=1 SV=1	2	11	11	11	9	7	7	6	5	8	9	7	7	6	5	8	9	7	7	6	5	8	9.7	9.7	9.7	161.77	1450	1450;1441	4.62	6	5	4	12	20	0	19.717	By MS/MS	By MS/MS	By MS/MS	By MS/MS	By MS/MS	By MS/MS
A0A2R8VKI7;Q9ERA0;Q9ERA0-2;Q9ERA0-3;A0A2R8VHZ4	A0A2R8VKI7;Q9ERA0;Q9ERA0-2;Q9ERA0-3	4;4;4;3;1	3;3;3;2;1	3;3;3;2;1	Alpha-globin transcription factor CP2	Tfcp2	tr|A0A2R8VKI7|A0A2R8VKI7_MOUSE Alpha-globin transcription factor CP2 OS=Mus musculus OX=10090 GN=Tfcp2 PE=1 SV=1;sp|Q9ERA0|TFCP2_MOUSE Alpha-globin transcription factor CP2 OS=Mus musculus OX=10090 GN=Tfcp2 PE=1 SV=1;sp|Q9ERA0-2|TFCP2_MOUSE Isoform 2 of Al	5	4	3	3	1	2	2	3	1	2	0	1	1	2	0	2	0	1	1	2	0	2	12.7	9.1	9.1	57.021	505	505;502;504;500;153	5.83				1	5	0.00060302	4.0332	By matching	By MS/MS	By MS/MS	By MS/MS	By matching	By MS/MS
A2A5V3;A2A5V2;S4R2D3;A0A2R8W6I7;P55194;A2A5V1;S4R2T6	A2A5V3;A2A5V2;S4R2D3;A0A2R8W6I7;P55194	5;5;5;5;5;1;1	5;5;5;5;5;1;1	5;5;5;5;5;1;1	SH3 domain-binding protein 1	Sh3bp1	tr|A2A5V3|A2A5V3_MOUSE SH3 domain-binding protein 1 OS=Mus musculus OX=10090 GN=Sh3bp1 PE=1 SV=1;tr|A2A5V2|A2A5V2_MOUSE SH3 domain-binding protein 1 OS=Mus musculus OX=10090 GN=Sh3bp1 PE=1 SV=1;tr|S4R2D3|S4R2D3_MOUSE SH3 domain-binding protein 1 OS=Mus mus	7	5	5	5	4	5	4	2	4	4	4	5	4	2	4	4	4	5	4	2	4	4	10.3	10.3	10.3	64.462	582	582;584;587;596;680;55;209	5			6	12	6	0	20.892	By MS/MS	By MS/MS	By MS/MS	By MS/MS	By MS/MS	By MS/MS
A0A2R8W6R3;P62878	A0A2R8W6R3;P62878	2;2	2;2	2;2	E3 ubiquitin-protein ligase RBX1;E3 ubiquitin-protein ligase RBX1, N-terminally processed	Rbx1	tr|A0A2R8W6R3|A0A2R8W6R3_MOUSE E3 ubiquitin-protein ligase RBX1 OS=Mus musculus OX=10090 GN=Rbx1 PE=1 SV=1;sp|P62878|RBX1_MOUSE E3 ubiquitin-protein ligase RBX1 OS=Mus musculus OX=10090 GN=Rbx1 PE=1 SV=1	2	2	2	2	2	2	2	2	2	2	2	2	2	2	2	2	2	2	2	2	2	2	22.9	22.9	22.9	9.1173	83	83;108	2.35	11	23				0	20.404	By MS/MS	By MS/MS	By MS/MS	By MS/MS	By MS/MS	By MS/MS
G5E846;A0A2R8W6R6;G3X981;P15331-3;P15331;P15331-2	G5E846;A0A2R8W6R6;G3X981;P15331-3;P15331;P15331-2	7;7;7;7;7;7	3;3;3;3;3;3	3;3;3;3;3;3	Peripherin	Prph	tr|G5E846|G5E846_MOUSE Peripherin OS=Mus musculus OX=10090 GN=Prph PE=1 SV=1;tr|A0A2R8W6R6|A0A2R8W6R6_MOUSE Peripherin OS=Mus musculus OX=10090 GN=Prph PE=1 SV=1;tr|G3X981|G3X981_MOUSE Peripherin OS=Mus musculus OX=10090 GN=Prph PE=1 SV=1;sp|P15331-3|PERI_	6	7	3	3	6	4	6	5	6	5	3	2	2	2	3	2	3	2	2	2	3	2	15.6	9.3	9.3	54.297	475	475;506;507;461;475;507	4.22	4		4	4	6	0	5.681	By MS/MS	By MS/MS	By MS/MS	By MS/MS	By MS/MS	By MS/MS
A0A2R8W6Y5;A0A2R8VKL5;E9Q066	A0A2R8W6Y5;A0A2R8VKL5;E9Q066	12;11;11	12;11;11	1;0;0		Larp4	tr|A0A2R8W6Y5|A0A2R8W6Y5_MOUSE La-related protein 4 OS=Mus musculus OX=10090 GN=Larp4 PE=1 SV=1;tr|A0A2R8VKL5|A0A2R8VKL5_MOUSE La-related protein 4 OS=Mus musculus OX=10090 GN=Larp4 PE=1 SV=1;tr|E9Q066|E9Q066_MOUSE La-related protein 4 OS=Mus musculus OX=1	3	12	12	1	11	7	11	7	8	5	11	7	11	7	8	5	1	1	1	1	0	0	32.5	32.5	1.8	67.487	610	610;660;718	3.05	27	18	10	6	12	0	113.66	By MS/MS	By MS/MS	By MS/MS	By MS/MS	By MS/MS	By MS/MS
A0A2Y9CZM3;Q6AXC6;A0A286YDY6;A0A286YCB9	A0A2Y9CZM3;Q6AXC6	5;5;2;1	5;5;2;1	5;5;2;1	Probable ATP-dependent RNA helicase DDX11	Ddx11	tr|A0A2Y9CZM3|A0A2Y9CZM3_MOUSE ATP-dependent DNA helicase DDX11 OS=Mus musculus OX=10090 GN=Ddx11 PE=1 SV=1;sp|Q6AXC6|DDX11_MOUSE ATP-dependent DNA helicase DDX11 OS=Mus musculus OX=10090 GN=Ddx11 PE=1 SV=2	4	5	5	5	2	0	2	2	3	3	2	0	2	2	3	3	2	0	2	2	3	3	5.5	5.5	5.5	98.727	880	880;906;393;168	5.5			3		9	0	7.9938	By MS/MS		By MS/MS	By MS/MS	By MS/MS	By MS/MS
A0A338P6S3;A0A338P695;Q6ZPR5-3;Q6ZPR5-2;Q6ZPR5-4;Q6ZPR5;A0A338P7L1;Q6ZPR5-5;A0A338P735;A0A338P715;A0A338P6P4;A0A338P7A7;A0A338P6I0;A0A338P6B0;A0A338P6W7;A0A338P6U9	A0A338P6S3;A0A338P695;Q6ZPR5-3;Q6ZPR5-2;Q6ZPR5-4;Q6ZPR5;A0A338P7L1;Q6ZPR5-5;A0A338P735	8;8;8;8;8;8;6;6;5;1;1;1;1;1;1;1	8;8;8;8;8;8;6;6;5;1;1;1;1;1;1;1	8;8;8;8;8;8;6;6;5;1;1;1;1;1;1;1	Sphingomyelin phosphodiesterase 4	Smpd4	tr|A0A338P6S3|A0A338P6S3_MOUSE Sphingomyelin phosphodiesterase 4 OS=Mus musculus OX=10090 GN=Smpd4 PE=1 SV=1;tr|A0A338P695|A0A338P695_MOUSE Sphingomyelin phosphodiesterase 4 OS=Mus musculus OX=10090 GN=Smpd4 PE=1 SV=1;sp|Q6ZPR5-3|NSMA3_MOUSE Isoform 3 of S	16	8	8	8	7	7	8	7	7	6	7	7	8	7	7	6	7	7	8	7	7	6	13.7	13.7	13.7	81.799	721	721;751;793;794;807;823;573;637;499;50;55;82;92;110;125;128	4.36	15	8	12	20	32	0	23.739	By MS/MS	By MS/MS	By MS/MS	By MS/MS	By MS/MS	By MS/MS
A0A338P697;Q3TUF7-2;Q3TUF7-3;Q3TUF7;A0A338P7J1;A0A338P689	A0A338P697;Q3TUF7-2;Q3TUF7-3;Q3TUF7	6;6;6;6;1;1	6;6;6;6;1;1	6;6;6;6;1;1	YEATS domain-containing protein 2	Yeats2	tr|A0A338P697|A0A338P697_MOUSE YEATS domain-containing protein 2 (Fragment) OS=Mus musculus OX=10090 GN=Yeats2 PE=1 SV=1;sp|Q3TUF7-2|YETS2_MOUSE Isoform 2 of YEATS domain-containing protein 2 OS=Mus musculus OX=10090 GN=Yeats2;sp|Q3TUF7-3|YETS2_MOUSE Isofo	6	6	6	6	3	5	4	5	6	2	3	5	4	5	6	2	3	5	4	5	6	2	6.7	6.7	6.7	144.77	1369	1369;1305;1354;1407;142;844	4.75		6	5	12	9	0	73.668	By MS/MS	By MS/MS	By MS/MS	By MS/MS	By MS/MS	By MS/MS
G5E8A0;A0A338P6F2;Q8CI95	G5E8A0;A0A338P6F2;Q8CI95	2;2;2	2;2;2	2;2;2	Oxysterol-binding protein;Oxysterol-binding protein-related protein 11	Osbpl11	tr|G5E8A0|G5E8A0_MOUSE Oxysterol-binding protein OS=Mus musculus OX=10090 GN=Osbpl11 PE=1 SV=1;tr|A0A338P6F2|A0A338P6F2_MOUSE Oxysterol-binding protein OS=Mus musculus OX=10090 GN=Osbpl11 PE=1 SV=1;sp|Q8CI95|OSB11_MOUSE Oxysterol-binding protein-related pr	3	2	2	2	1	1	1	2	1	1	1	1	1	2	1	1	1	1	1	2	1	1	3.7	3.7	3.7	84.332	757	757;751;751	3.73	3		2	6		0	5.4836	By MS/MS	By MS/MS	By MS/MS	By MS/MS	By MS/MS	By matching
A0A338P6G6;A0A384DV79;P17095-1;A0A338P6E8;A0A338P6D0	A0A338P6G6;A0A384DV79;P17095-1;A0A338P6E8	4;4;4;3;1	1;1;1;0;0	1;1;1;0;0	High mobility group protein HMG-I/HMG-Y	Hmga1	tr|A0A338P6G6|A0A338P6G6_MOUSE High mobility group protein HMG-I/HMG-Y OS=Mus musculus OX=10090 GN=Hmga1 PE=1 SV=1;tr|A0A384DV79|A0A384DV79_MOUSE High mobility group protein HMG-I/HMG-Y OS=Mus musculus OX=10090 GN=Hmga1 PE=1 SV=1;sp|P17095-1|HMGA1_MOUSE Is	5	4	1	1	3	3	4	3	2	2	1	0	1	0	0	0	1	0	1	0	0	0	36.8	16.1	16.1	9.4226	87	87;95;96;111;118	5				2		0.003581	2.4453	By MS/MS	By matching	By MS/MS	By matching	By matching	By matching
A0A338P6I9	A0A338P6I9	1	1	1			tr|A0A338P6I9|A0A338P6I9_MOUSE Uncharacterized protein OS=Mus musculus OX=10090 PE=4 SV=1	1	1	1	1	1	1	1	0	1	0	1	1	1	0	1	0	1	1	1	0	1	0	27.1	27.1	27.1	6.7709	59	59	3		4				0	6.3235	By MS/MS	By MS/MS	By MS/MS		By MS/MS
A0A338P6K9;A2BIE1	A0A338P6K9;A2BIE1	16;15	16;15	16;15		Qser1	tr|A0A338P6K9|A0A338P6K9_MOUSE Glutamine and serine-rich 1 OS=Mus musculus OX=10090 GN=Qser1 PE=1 SV=1;tr|A2BIE1|A2BIE1_MOUSE Glutamine and serine-rich 1 OS=Mus musculus OX=10090 GN=Qser1 PE=1 SV=2	2	16	16	16	11	6	13	10	8	8	11	6	13	10	8	8	11	6	13	10	8	8	13.8	13.8	13.8	194.47	1788	1788;1698	3.82	9	21	18	17	9	0	56.055	By MS/MS	By MS/MS	By MS/MS	By MS/MS	By MS/MS	By MS/MS
A0A338P6P0;Q9CQ33;Q9CQ33-2;A0A338P686;A0A338P6Y5	A0A338P6P0;Q9CQ33;Q9CQ33-2;A0A338P686;A0A338P6Y5	2;2;2;1;1	2;2;2;1;1	2;2;2;1;1	Leucine-zipper-like transcriptional regulator 1	Lztr1	tr|A0A338P6P0|A0A338P6P0_MOUSE Leucine-zipper-like transcriptional regulator 1 OS=Mus musculus OX=10090 GN=Lztr1 PE=1 SV=1;sp|Q9CQ33|LZTR1_MOUSE Leucine-zipper-like transcriptional regulator 1 OS=Mus musculus OX=10090 GN=Lztr1 PE=1 SV=2;sp|Q9CQ33-2|LZTR1_M	5	2	2	2	0	0	1	1	2	1	0	0	1	1	2	1	0	0	1	1	2	1	2.7	2.7	2.7	92.149	818	818;837;866;280;529	5.2				4	1	0	5.2091			By MS/MS	By MS/MS	By MS/MS	By MS/MS
D4AFX6;A0A338P6P6;Q6ZQK5-2;Q6ZQK5;A0A2R8W6H4;A2ADA6;Q6NXL5	D4AFX6;A0A338P6P6;Q6ZQK5-2;Q6ZQK5	5;5;5;5;1;1;1	5;5;5;5;1;1;1	5;5;5;5;1;1;1	Arf-GAP with coiled-coil, ANK repeat and PH domain-containing protein 2	Acap2	tr|D4AFX6|D4AFX6_MOUSE Arf-GAP with coiled-coil, ANK repeat and PH domain-containing protein 2 OS=Mus musculus OX=10090 GN=Acap2 PE=1 SV=1;tr|A0A338P6P6|A0A338P6P6_MOUSE Arf-GAP with coiled-coil, ANK repeat and PH domain-containing protein 2 OS=Mus musculu	7	5	5	5	4	0	3	4	1	1	4	0	3	4	1	1	4	0	3	4	1	1	7.3	7.3	7.3	88.085	777	777;805;752;770;142;829;833	4.92			4	6	3	0	11.152	By MS/MS		By MS/MS	By MS/MS	By MS/MS	By MS/MS
A0A338P729;A0A338P6R8;A0A338P769;B7ZNM7;Q9Z2Q6	A0A338P729;A0A338P6R8;A0A338P769;B7ZNM7;Q9Z2Q6	1;1;1;1;1	1;1;1;1;1	1;1;1;1;1	Septin-5	2020-09-05	tr|A0A338P729|A0A338P729_MOUSE Septin 5 OS=Mus musculus OX=10090 GN=Sept5 PE=1 SV=1;tr|A0A338P6R8|A0A338P6R8_MOUSE Predicted gene, 49601 OS=Mus musculus OX=10090 GN=Gm49601 PE=3 SV=1;tr|A0A338P769|A0A338P769_MOUSE Septin 5 OS=Mus musculus OX=10090 GN=Sept5	5	1	1	1	0	1	0	1	1	1	0	1	0	1	1	1	0	1	0	1	1	1	3.6	3.6	3.6	28.668	248	248;365;378;381;369	6					4	0.0084966	2.0216		By matching		By matching	By MS/MS	By MS/MS
E9Q6R4;E9Q4N7;A0A338P6U8;E9Q4N6	E9Q6R4;E9Q4N7;A0A338P6U8;E9Q4N6	8;8;8;7	8;8;8;7	8;8;8;7		Arid1b	tr|E9Q6R4|E9Q6R4_MOUSE AT-rich interactive domain-containing protein 1B OS=Mus musculus OX=10090 GN=Arid1b PE=1 SV=1;sp|E9Q4N7|ARI1B_MOUSE AT-rich interactive domain-containing protein 1B OS=Mus musculus OX=10090 GN=Arid1b PE=1 SV=1;tr|A0A338P6U8|A0A338P6U	4	8	8	8	1	1	4	4	2	1	1	1	4	4	2	1	1	1	4	4	2	1	4.6	4.6	4.6	237.02	2243	2243;2244;2296;1762	4.23		3	7		3	0	19.576	By MS/MS	By MS/MS	By MS/MS	By MS/MS	By MS/MS	By matching
A0A338P6V9;Q8K2J4	A0A338P6V9;Q8K2J4	1;1	1;1	1;1	Coiled-coil domain-containing protein 14	Ccdc14	tr|A0A338P6V9|A0A338P6V9_MOUSE Coiled-coil domain-containing protein 14 OS=Mus musculus OX=10090 GN=Ccdc14 PE=1 SV=1;sp|Q8K2J4|CCD14_MOUSE Coiled-coil domain-containing protein 14 OS=Mus musculus OX=10090 GN=Ccdc14 PE=2 SV=3	2	1	1	1	0	0	0	1	1	0	0	0	0	1	1	0	0	0	0	1	1	0	1.2	1.2	1.2	97.18	886	886;934	4			2			0.0083362	2.0329				By matching	By MS/MS
A0A338P6W3;G5E8T2;O88196-5;O88196-4;O88196-3;O88196-6;O88196-2;O88196;D3Z485;A0A0R4J1T2;D6RHT6;D6RDD2;D6RD03;D6RFU5;A0A338P6J6	A0A338P6W3;G5E8T2;O88196-5;O88196-4;O88196-3;O88196-6;O88196-2;O88196;D3Z485;A0A0R4J1T2;D6RHT6;D6RDD2;D6RD03;D6RFU5	4;4;4;4;4;4;4;4;2;2;2;2;2;2;1	4;4;4;4;4;4;4;4;2;2;2;2;2;2;1	4;4;4;4;4;4;4;4;2;2;2;2;2;2;1	E3 ubiquitin-protein ligase TTC3	Ttc3	tr|A0A338P6W3|A0A338P6W3_MOUSE E3 ubiquitin-protein ligase TTC3 OS=Mus musculus OX=10090 GN=Ttc3 PE=1 SV=1;tr|G5E8T2|G5E8T2_MOUSE E3 ubiquitin-protein ligase TTC3 OS=Mus musculus OX=10090 GN=Ttc3 PE=1 SV=1;sp|O88196-5|TTC3_MOUSE Isoform 5 of E3 ubiquitin-p	15	4	4	4	3	0	2	2	2	1	3	0	2	2	2	1	3	0	2	2	2	1	3.3	3.3	3.3	182.54	1624	1624;1979;1578;1938;1961;1978;1978;1979;622;776;1135;1162;1179;1197;250	3.9		4	3	3		0	11.211	By MS/MS		By MS/MS	By MS/MS	By MS/MS	By MS/MS
A0A338P702;A0A338P7E5;A0A338P786;P68037	A0A338P702;A0A338P7E5;A0A338P786;P68037	5;5;5;5	5;5;5;5	5;5;5;5	Ubiquitin-conjugating enzyme E2 L3	Ube2l3	tr|A0A338P702|A0A338P702_MOUSE Ubiquitin-conjugating enzyme E2 L3 OS=Mus musculus OX=10090 GN=Ube2l3 PE=1 SV=1;tr|A0A338P7E5|A0A338P7E5_MOUSE Ubiquitin-conjugating enzyme E2 L3 OS=Mus musculus OX=10090 GN=Ube2l3 PE=1 SV=1;tr|A0A338P786|A0A338P786_MOUSE Ubi	4	5	5	5	5	5	5	5	5	5	5	5	5	5	5	5	5	5	5	5	5	5	40.4	40.4	40.4	13.173	114	114;122;146;154	3.03	40		1	6	23	0	45.243	By MS/MS	By MS/MS	By MS/MS	By MS/MS	By MS/MS	By MS/MS
A0A338P7E3;A0A338P711;C0HKG6;C0HKG5	A0A338P7E3;A0A338P711;C0HKG6;C0HKG5	4;4;4;4	4;4;4;4	4;4;4;4			tr|A0A338P7E3|A0A338P7E3_MOUSE Ribonuclease T2-B OS=Mus musculus OX=10090 GN=Rnaset2b PE=1 SV=1;tr|A0A338P711|A0A338P711_MOUSE Ribonuclease T2-B (Fragment) OS=Mus musculus OX=10090 GN=Rnaset2b PE=1 SV=1;sp|C0HKG6|RNT2B_MOUSE Ribonuclease T2-B OS=Mus muscul	4	4	4	4	3	2	3	3	2	2	3	2	3	3	2	2	3	2	3	3	2	2	23.3	23.3	23.3	18.783	163	163;163;259;259	5.11			5	6	7	0	15.903	By MS/MS	By MS/MS	By MS/MS	By MS/MS	By MS/MS	By MS/MS
A0A338P730;E9Q7C1;Q3TE00;Q924H2;A0A338P6U0;A0A338P7G2;A0A338P6A9;A0A338P6V8	A0A338P730;E9Q7C1;Q3TE00;Q924H2;A0A338P6U0;A0A338P7G2;A0A338P6A9;A0A338P6V8	2;2;2;2;1;1;1;1	2;2;2;2;1;1;1;1	2;2;2;2;1;1;1;1	Mediator of RNA polymerase II transcription subunit 15	Med15	tr|A0A338P730|A0A338P730_MOUSE Mediator of RNA polymerase II transcription subunit 15 OS=Mus musculus OX=10090 GN=Med15 PE=1 SV=1;tr|E9Q7C1|E9Q7C1_MOUSE Mediator of RNA polymerase II transcription subunit 15 OS=Mus musculus OX=10090 GN=Med15 PE=1 SV=1;tr|Q	8	2	2	2	2	1	1	2	1	1	2	1	1	2	1	1	2	1	1	2	1	1	4.1	4.1	4.1	71.918	639	639;749;766;789;77;87;218;354	4.12		5			3	0.00059102	3.7037	By MS/MS	By MS/MS	By MS/MS	By MS/MS	By MS/MS	By MS/MS
D3Z1M9;A0A338P787;P50615	D3Z1M9;A0A338P787;P50615	3;3;3	3;3;3	3;3;3	Protein BTG3	Btg3	tr|D3Z1M9|D3Z1M9_MOUSE Protein BTG3 (Fragment) OS=Mus musculus OX=10090 GN=Btg3 PE=1 SV=1;tr|A0A338P787|A0A338P787_MOUSE Protein BTG3 (Fragment) OS=Mus musculus OX=10090 GN=Btg3 PE=1 SV=1;sp|P50615|BTG3_MOUSE Protein BTG3 OS=Mus musculus OX=10090 GN=Btg3 P	3	3	3	3	3	1	2	2	2	2	3	1	2	2	2	2	3	1	2	2	2	2	22.6	22.6	22.6	16.107	137	137;152;252	2.69	5	2	6			0.00041178	4.5122	By MS/MS	By MS/MS	By MS/MS	By MS/MS	By MS/MS	By MS/MS
A0A338P7B7;P51807	A0A338P7B7;P51807	2;2	2;2	2;2	Dynein light chain Tctex-type 1	Dynlt1	tr|A0A338P7B7|A0A338P7B7_MOUSE Dynein light chain Tctex-type 1A OS=Mus musculus OX=10090 GN=Dynlt1a PE=1 SV=1;sp|P51807|DYLT1_MOUSE Dynein light chain Tctex-type 1 OS=Mus musculus OX=10090 GN=Dynlt1 PE=1 SV=1	2	2	2	2	2	2	2	2	2	2	2	2	2	2	2	2	2	2	2	2	2	2	23.2	23.2	23.2	12.242	112	112;113	3.77	20		11	21	12	0	24.596	By MS/MS	By MS/MS	By MS/MS	By MS/MS	By MS/MS	By MS/MS
A0A338P7C2;Q8BFX3;A0A0A6YX69	A0A338P7C2;Q8BFX3;A0A0A6YX69	2;2;1	2;2;1	2;2;1	BTB/POZ domain-containing protein KCTD3	Kctd3	tr|A0A338P7C2|A0A338P7C2_MOUSE BTB/POZ domain-containing protein KCTD3 (Fragment) OS=Mus musculus OX=10090 GN=Kctd3 PE=1 SV=1;sp|Q8BFX3|KCTD3_MOUSE BTB/POZ domain-containing protein KCTD3 OS=Mus musculus OX=10090 GN=Kctd3 PE=1 SV=1;tr|A0A0A6YX69|A0A0A6YX69	3	2	2	2	2	0	1	2	1	1	2	0	1	2	1	1	2	0	1	2	1	1	18.1	18.1	18.1	14.077	127	127;815;242	3.43		4	3			0	7.8324	By MS/MS		By MS/MS	By MS/MS	By MS/MS	By matching
A0A338P7E9;Q9CQS5	A0A338P7E9;Q9CQS5	5;5	5;5	5;5	Serine/threonine-protein kinase RIO2	Riok2	tr|A0A338P7E9|A0A338P7E9_MOUSE Serine/threonine-protein kinase RIO2 OS=Mus musculus OX=10090 GN=Riok2 PE=1 SV=1;sp|Q9CQS5|RIOK2_MOUSE Serine/threonine-protein kinase RIO2 OS=Mus musculus OX=10090 GN=Riok2 PE=1 SV=1	2	5	5	5	4	3	4	5	4	4	4	3	4	5	4	4	4	3	4	5	4	4	14.9	14.9	14.9	54.73	477	477;547	3.47	7	10	18	8		0	23.197	By MS/MS	By MS/MS	By MS/MS	By MS/MS	By MS/MS	By MS/MS
A0A338P7L8;Q8BJF9;B1AVH5;Q8C0P5	A0A338P7L8;Q8BJF9	3;3;1;1	3;3;1;1	3;3;1;1	Charged multivesicular body protein 2b	Chmp2b	tr|A0A338P7L8|A0A338P7L8_MOUSE Charged multivesicular body protein 2b OS=Mus musculus OX=10090 GN=Chmp2b PE=1 SV=1;sp|Q8BJF9|CHM2B_MOUSE Charged multivesicular body protein 2b OS=Mus musculus OX=10090 GN=Chmp2b PE=1 SV=1	4	3	3	3	3	1	1	3	1	2	3	1	1	3	1	2	3	1	1	3	1	2	12.9	12.9	12.9	23.528	209	209;213;543;524	3.62	4	3	11	6		0.00020947	4.7462	By MS/MS	By MS/MS	By MS/MS	By MS/MS	By MS/MS	By MS/MS
A0A338P7L9;Q9CQ49	A0A338P7L9;Q9CQ49	3;3	3;3	3;3	Nuclear cap-binding protein subunit 2	Ncbp2	tr|A0A338P7L9|A0A338P7L9_MOUSE Nuclear cap-binding protein subunit 2 OS=Mus musculus OX=10090 GN=Ncbp2 PE=1 SV=1;sp|Q9CQ49|NCBP2_MOUSE Nuclear cap-binding protein subunit 2 OS=Mus musculus OX=10090 GN=Ncbp2 PE=1 SV=1	2	3	3	3	3	2	3	3	3	2	3	2	3	3	3	2	3	2	3	3	3	2	17	17	17	19.109	165	165;156	3.18	10		4	4	4	0	6.1691	By MS/MS	By MS/MS	By MS/MS	By MS/MS	By MS/MS	By MS/MS
A0A3B2W3M0;A0A3B2WBB9;D6RG58;A0A3B2WAS4;A0A3F2YNL4;Q9Z1B7	A0A3B2W3M0;A0A3B2WBB9;D6RG58;A0A3B2WAS4;A0A3F2YNL4;Q9Z1B7	1;1;1;1;1;1	1;1;1;1;1;1	1;1;1;1;1;1	Mitogen-activated protein kinase 13	Mapk13	tr|A0A3B2W3M0|A0A3B2W3M0_MOUSE Mitogen-activated protein kinase 13 (Fragment) OS=Mus musculus OX=10090 GN=Mapk13 PE=1 SV=1;tr|A0A3B2WBB9|A0A3B2WBB9_MOUSE Mitogen-activated protein kinase OS=Mus musculus OX=10090 GN=Mapk13 PE=1 SV=1;tr|D6RG58|D6RG58_MOUSE M	6	1	1	1	0	0	1	1	0	0	0	0	1	1	0	0	0	0	1	1	0	0	11.8	11.8	11.8	21.563	186	186;227;257;266;308;366	6					2	0.00040866	4.3849			By MS/MS	By matching
A0A3B2W3M7;P18608	A0A3B2W3M7;P18608	2;2	2;2	2;2	Non-histone chromosomal protein HMG-14	Hmgn1	tr|A0A3B2W3M7|A0A3B2W3M7_MOUSE Non-histone chromosomal protein HMG-14 OS=Mus musculus OX=10090 GN=Hmgn1 PE=1 SV=1;sp|P18608|HMGN1_MOUSE Non-histone chromosomal protein HMG-14 OS=Mus musculus OX=10090 GN=Hmgn1 PE=1 SV=2	2	2	2	2	2	2	2	2	1	2	2	2	2	2	1	2	2	2	2	2	1	2	44.2	44.2	44.2	9.029	86	86;96	2.33	6	12				0	25.985	By MS/MS	By MS/MS	By MS/MS	By MS/MS	By MS/MS	By MS/MS
D3Z7M3;A0A3B2WBI3;A0A3B2W7D2;A0A3B2W3S2;A0A3B2WAR2;A0A3B2WCZ5;A0A3B2WB08;A0A3B2WD86;A0A3B2W3M4;K7N702;G5E8Z7;K7N6T2;A0A3B2WCT2;L7N2B3;A0A3B2WCR5;A0A3B2WDB7;A0A3B2WDB2;L7N2D8	D3Z7M3;A0A3B2WBI3;A0A3B2W7D2;A0A3B2W3S2;A0A3B2WAR2;A0A3B2WCZ5;A0A3B2WB08;A0A3B2WD86	3;3;3;3;2;2;2;2;1;1;1;1;1;1;1;1;1;1	3;3;3;3;2;2;2;2;1;1;1;1;1;1;1;1;1;1	3;3;3;3;2;2;2;2;1;1;1;1;1;1;1;1;1;1		Vmn2r73	tr|D3Z7M3|D3Z7M3_MOUSE MCG3424 OS=Mus musculus OX=10090 GN=Vmn2r73 PE=3 SV=2;tr|A0A3B2WBI3|A0A3B2WBI3_MOUSE Vomeronasal 2, receptor 73 OS=Mus musculus OX=10090 GN=Vmn2r73 PE=4 SV=1;tr|A0A3B2W7D2|A0A3B2W7D2_MOUSE Vomeronasal 2, receptor 73 OS=Mus musculus O	18	3	3	3	2	1	2	1	1	1	2	1	2	1	1	1	2	1	2	1	1	1	4	4	4	97.272	851	851;551;572;830;475;496;754;775;104;854;853;851;821;851;830;234;255;855	4.62			3	5		0.0064969	2.1724	By MS/MS	By matching	By MS/MS	By matching	By MS/MS	By matching
A0A3B2W864;A0A338P7K4;A0A338P731;Q3UW83;A0A338P6L9;B2KF67;A0A338P6T6;I1E4X7;Q9JI46	A0A3B2W864;A0A338P7K4;A0A338P731;Q3UW83	7;6;5;5;1;1;1;1;1	1;0;0;0;1;1;1;1;1	1;0;0;0;1;1;1;1;1		Rps10	tr|A0A3B2W864|A0A3B2W864_MOUSE Predicted gene, 49804 OS=Mus musculus OX=10090 GN=Gm49804 PE=4 SV=1;tr|A0A338P7K4|A0A338P7K4_MOUSE 40S ribosomal protein S10 OS=Mus musculus OX=10090 GN=Rps10 PE=1 SV=1;tr|A0A338P731|A0A338P731_MOUSE 40S ribosomal protein S10	9	7	1	1	6	4	6	7	5	6	1	1	1	1	1	1	1	1	1	1	1	1	18.8	3.8	3.8	32.717	287	287;169;107;154;116;139;139;159;168	6					6	0.00060447	4.1177	By MS/MS	By MS/MS	By MS/MS	By MS/MS	By MS/MS	By MS/MS
A0A3B2WB12;Q64327;A0A3B2WCH7;A0A3B2WD56	A0A3B2WB12;Q64327	3;3;1;1	3;3;1;1	3;3;1;1	Male-enhanced antigen 1	Mea1	tr|A0A3B2WB12|A0A3B2WB12_MOUSE Male-enhanced antigen 1 (Fragment) OS=Mus musculus OX=10090 GN=Mea1 PE=1 SV=1;sp|Q64327|MEA1_MOUSE Male-enhanced antigen 1 OS=Mus musculus OX=10090 GN=Mea1 PE=1 SV=1	4	3	3	3	1	1	2	2	0	2	1	1	2	2	0	2	1	1	2	2	0	2	26	26	26	18.456	173	173;174;75;131	2.75	1	7				0	48.1	By MS/MS	By matching	By MS/MS	By MS/MS		By MS/MS
A0A3B2WB82;Q9JK23	A0A3B2WB82;Q9JK23	8;8	8;8	8;8	Proteasome assembly chaperone 1	Psmg1	tr|A0A3B2WB82|A0A3B2WB82_MOUSE Proteasome assembly chaperone 1 OS=Mus musculus OX=10090 GN=Psmg1 PE=1 SV=1;sp|Q9JK23|PSMG1_MOUSE Proteasome assembly chaperone 1 OS=Mus musculus OX=10090 GN=Psmg1 PE=1 SV=1	2	8	8	8	6	7	7	6	4	8	6	7	7	6	4	8	6	7	7	6	4	8	29.9	29.9	29.9	30.54	268	268;289	3.65	15	14	13	24	5	0	232.04	By MS/MS	By MS/MS	By MS/MS	By MS/MS	By MS/MS	By MS/MS
A0A3B2WBC6	A0A3B2WBC6	1	1	1			tr|A0A3B2WBC6|A0A3B2WBC6_MOUSE DNA-directed RNA polymerase II subunit GRINL1A OS=Mus musculus OX=10090 GN=Polr2m PE=4 SV=1	1	1	1	1	1	1	1	1	1	1	1	1	1	1	1	1	1	1	1	1	1	1	29.8	29.8	29.8	8.5937	84	84	4	6			6	6	0	56.279	By MS/MS	By MS/MS	By MS/MS	By MS/MS	By MS/MS	By MS/MS
Q9WV92-8;A7YY80;Q9WV92-2;Q9WV92;Q9WV92-3;Q9WV92-5;Q9WV92-4;Q9WV92-6;Q9WV92-7;D0VYV6;A0A3B2WD96;A0A3B2WBE1;A0A286YD84;A0A286YDY4;A0A286YCY8;A0A286YCY1;A0A286YDD0;A0A286YCT6;A0A286YD94	Q9WV92-8;A7YY80;Q9WV92-2;Q9WV92;Q9WV92-3;Q9WV92-5;Q9WV92-4;Q9WV92-6;Q9WV92-7;D0VYV6;A0A3B2WD96;A0A3B2WBE1;A0A286YD84;A0A286YDY4	7;7;7;7;7;7;7;7;7;7;7;7;4;4;3;2;2;1;1	3;3;3;3;3;3;3;3;3;3;3;3;2;2;1;2;1;1;1	3;3;3;3;3;3;3;3;3;3;3;3;2;2;1;2;1;1;1	Band 4.1-like protein 3;Band 4.1-like protein 3, N-terminally processed	Epb41l3;Epb4.1l3	sp|Q9WV92-8|E41L3_MOUSE Isoform 8 of Band 4.1-like protein 3 OS=Mus musculus OX=10090 GN=Epb41l3;tr|A7YY80|A7YY80_MOUSE 130kDa Protein 4.1B MEF cell isoform OS=Mus musculus OX=10090 GN=Epb41l3 PE=1 SV=1;sp|Q9WV92-2|E41L3_MOUSE Isoform 2 of Band 4.1-like pr	19	7	3	3	5	3	4	5	3	5	1	1	1	3	2	3	1	1	1	3	2	3	8.1	4.8	4.8	116.78	1052	1052;876;939;929;917;904;894;882;823;911;812;819;605;852;287;262;53;223;29	3.36		7	4			0	12.282	By matching	By MS/MS	By MS/MS	By MS/MS	By MS/MS	By MS/MS
A0A3B2WBH9;A0A3B2WCN9;Q9Z0U1;A0A494B9E6;Q921G9;Q9QXY1	A0A3B2WBH9;A0A3B2WCN9;Q9Z0U1	34;34;34;1;1;1	34;34;34;1;1;1	34;34;34;1;1;1	Tight junction protein ZO-2	Tjp2	tr|A0A3B2WBH9|A0A3B2WBH9_MOUSE Tight junction protein ZO-2 OS=Mus musculus OX=10090 GN=Tjp2 PE=1 SV=1;tr|A0A3B2WCN9|A0A3B2WCN9_MOUSE Tight junction protein 2, isoform CRA_c OS=Mus musculus OX=10090 GN=Tjp2 PE=1 SV=1;sp|Q9Z0U1|ZO2_MOUSE Tight junction prote	6	34	34	34	30	27	31	27	27	25	30	27	31	27	27	25	30	27	31	27	27	25	33.7	33.7	33.7	131.1	1165	1165;1190;1167;171;904;905	3.28	110	21	57	69	36	0	229.73	By MS/MS	By MS/MS	By MS/MS	By MS/MS	By MS/MS	By MS/MS
A0A3B2WBL1;Q5XJF6;P53026;A0A3B2WDD2;A0A3B2W824;A0A3B2W820;A0A3B2WCA5;D6RE43	A0A3B2WBL1;Q5XJF6;P53026;A0A3B2WDD2;A0A3B2W824;A0A3B2W820	13;13;12;11;10;7;3;3	13;13;12;11;10;7;3;3	13;13;12;11;10;7;3;3	Ribosomal protein;60S ribosomal protein L10a	Rpl10a	tr|A0A3B2WBL1|A0A3B2WBL1_MOUSE Ribosomal protein OS=Mus musculus OX=10090 GN=Rpl10a PE=1 SV=1;tr|Q5XJF6|Q5XJF6_MOUSE Ribosomal protein OS=Mus musculus OX=10090 GN=Rpl10a PE=1 SV=1;sp|P53026|RL10A_MOUSE 60S ribosomal protein L10a OS=Mus musculus OX=10090 GN	8	13	13	13	12	11	13	13	11	13	12	11	13	13	11	13	12	11	13	13	11	13	51.9	51.9	51.9	24.744	216	216;217;217;190;164;118;54;58	3.8	120	6	39	69	113	0	323.31	By MS/MS	By MS/MS	By MS/MS	By MS/MS	By MS/MS	By MS/MS
A0A3B2WBM3;P62869;A6PWE0	A0A3B2WBM3;P62869	6;6;1	6;6;1	6;6;1	Transcription elongation factor B polypeptide 2	Tceb2	tr|A0A3B2WBM3|A0A3B2WBM3_MOUSE Elongin-B OS=Mus musculus OX=10090 GN=Elob PE=1 SV=1;sp|P62869|ELOB_MOUSE Elongin-B OS=Mus musculus OX=10090 GN=Elob PE=1 SV=1	3	6	6	6	6	5	5	5	4	5	6	5	5	5	4	5	6	5	5	5	4	5	65.6	65.6	65.6	10.109	90	90;118;161	2.57	20	15	6	1	4	0	20.65	By MS/MS	By MS/MS	By MS/MS	By MS/MS	By MS/MS	By MS/MS
A0A3B2WCD8;Q3U0V1;A0A3B2W465;A0A0G2JE55;A0A0G2JGT1	A0A3B2WCD8;Q3U0V1	25;25;7;1;1	22;22;6;0;0	22;22;6;0;0	Far upstream element-binding protein 2	Khsrp	tr|A0A3B2WCD8|A0A3B2WCD8_MOUSE Far upstream element-binding protein 2 OS=Mus musculus OX=10090 GN=Khsrp PE=1 SV=1;sp|Q3U0V1|FUBP2_MOUSE Far upstream element-binding protein 2 OS=Mus musculus OX=10090 GN=Khsrp PE=1 SV=2	5	25	22	22	22	17	22	23	19	18	20	16	19	20	17	16	20	16	19	20	17	16	34.4	30.2	30.2	74.252	721	721;748;238;142;157	3.06	100	36	69	48	17	0	323.31	By MS/MS	By MS/MS	By MS/MS	By MS/MS	By MS/MS	By MS/MS
A0A3B2WCL5;Q9CT10	A0A3B2WCL5;Q9CT10	14;14	14;14	14;14	Ran-binding protein 3	Ranbp3	tr|A0A3B2WCL5|A0A3B2WCL5_MOUSE RAN binding protein 3, isoform CRA_i OS=Mus musculus OX=10090 GN=Ranbp3 PE=1 SV=1;sp|Q9CT10|RANB3_MOUSE Ran-binding protein 3 OS=Mus musculus OX=10090 GN=Ranbp3 PE=1 SV=2	2	14	14	14	11	10	13	12	11	13	11	10	13	12	11	13	11	10	13	12	11	13	31.2	31.2	31.2	59.33	558	558;491	3.23	52	23	12	12	33	0	80.911	By MS/MS	By MS/MS	By MS/MS	By MS/MS	By MS/MS	By MS/MS
Q62172;A0A3B2WCS4;A0A3B2W7X3	Q62172;A0A3B2WCS4;A0A3B2W7X3	2;2;1	2;2;1	2;2;1	RalA-binding protein 1	Ralbp1	sp|Q62172|RBP1_MOUSE RalA-binding protein 1 OS=Mus musculus OX=10090 GN=Ralbp1 PE=1 SV=4;tr|A0A3B2WCS4|A0A3B2WCS4_MOUSE RalA-binding protein 1 OS=Mus musculus OX=10090 GN=Ralbp1 PE=1 SV=1;tr|A0A3B2W7X3|A0A3B2W7X3_MOUSE RalA-binding protein 1 (Fragment) OS=	3	2	2	2	1	1	2	1	2	1	1	1	2	1	2	1	1	1	2	1	2	1	5.2	5.2	5.2	75.042	648	648;594;224	4.08		3	5	4		0	9.4903	By MS/MS	By MS/MS	By MS/MS	By MS/MS	By MS/MS	By matching
A0A3B2WD93;Q9CWG8-2;Q9CWG8	A0A3B2WD93;Q9CWG8-2;Q9CWG8	2;2;2	2;2;2	2;2;2	NADH dehydrogenase [ubiquinone] complex I, assembly factor 7	Ndufaf7	tr|A0A3B2WD93|A0A3B2WD93_MOUSE Protein arginine methyltransferase NDUFAF7 (Fragment) OS=Mus musculus OX=10090 GN=Ndufaf7 PE=1 SV=1;sp|Q9CWG8-2|NDUF7_MOUSE Isoform 2 of Protein arginine methyltransferase NDUFAF7, mitochondrial OS=Mus musculus OX=10090 GN=Nd	3	2	2	2	1	1	1	1	1	1	1	1	1	1	1	1	1	1	1	1	1	1	8.7	8.7	8.7	32.058	288	288;383;436	4.3			7	3		0.0020553	2.9561	By MS/MS	By MS/MS	By MS/MS	By MS/MS	By MS/MS	By MS/MS
A0A3F2YNL8;Q91VH6;A0A3B2W4I2;A0A3B2W7C9	A0A3F2YNL8;Q91VH6;A0A3B2W4I2	3;3;2;1	3;3;2;1	3;3;2;1	Protein MEMO1	Memo1	tr|A0A3F2YNL8|A0A3F2YNL8_MOUSE Protein MEMO1 OS=Mus musculus OX=10090 GN=Memo1 PE=1 SV=1;sp|Q91VH6|MEMO1_MOUSE Protein MEMO1 OS=Mus musculus OX=10090 GN=Memo1 PE=1 SV=1;tr|A0A3B2W4I2|A0A3B2W4I2_MOUSE Protein MEMO1 OS=Mus musculus OX=10090 GN=Memo1 PE=1 SV=	4	3	3	3	1	1	0	1	2	1	1	1	0	1	2	1	1	1	0	1	2	1	15.6	15.6	15.6	32.542	289	289;297;206;222	5.5			1	1	4	0	32.778	By MS/MS	By MS/MS		By MS/MS	By MS/MS	By MS/MS
A0A3Q4EBK4;Q6P1B9;O08539-2;O08539;A0A3Q4EBR8	A0A3Q4EBK4;Q6P1B9;O08539-2;O08539	8;8;8;8;2	8;8;8;8;2	8;8;8;8;2	Myc box-dependent-interacting protein 1	Bin1	tr|A0A3Q4EBK4|A0A3Q4EBK4_MOUSE Myc box-dependent-interacting protein 1 OS=Mus musculus OX=10090 GN=Bin1 PE=1 SV=1;tr|Q6P1B9|Q6P1B9_MOUSE Bin1 protein OS=Mus musculus OX=10090 GN=Bin1 PE=1 SV=1;sp|O08539-2|BIN1_MOUSE Isoform 2 of Myc box-dependent-interacti	5	8	8	8	8	5	6	7	6	6	8	5	6	7	6	6	8	5	6	7	6	6	28.8	28.8	28.8	45.786	410	410;477;434;588;120	3.37	16	7	20	14	2	0	70.049	By MS/MS	By MS/MS	By MS/MS	By MS/MS	By MS/MS	By MS/MS
A0A3Q4EG99;A0A3Q4EBT8;D3YXC2;A0A3Q4EC24;A0A3Q4EGL4;Q791T5-2;Q791T5	A0A3Q4EG99;A0A3Q4EBT8;D3YXC2;A0A3Q4EC24;A0A3Q4EGL4;Q791T5-2;Q791T5	2;2;2;2;2;2;2	2;2;2;2;2;2;2	2;2;2;2;2;2;2	Mitochondrial carrier homolog 1	Mtch1	tr|A0A3Q4EG99|A0A3Q4EG99_MOUSE Mitochondrial carrier homolog 1 OS=Mus musculus OX=10090 GN=Mtch1 PE=1 SV=1;tr|A0A3Q4EBT8|A0A3Q4EBT8_MOUSE Mitochondrial carrier homolog 1 OS=Mus musculus OX=10090 GN=Mtch1 PE=1 SV=1;tr|D3YXC2|D3YXC2_MOUSE Mitochondrial carri	7	2	2	2	2	1	1	2	1	2	2	1	1	2	1	2	2	1	1	2	1	2	7.3	7.3	7.3	29.073	260	260;277;294;299;311;372;389	3.14	6		5		3	0.0023866	2.7691	By MS/MS	By MS/MS	By MS/MS	By MS/MS	By matching	By MS/MS
A0A3Q4EBV4;Q3TJZ6	A0A3Q4EBV4;Q3TJZ6	5;5	4;4	4;4	Protein FAM98A	Fam98a	tr|A0A3Q4EBV4|A0A3Q4EBV4_MOUSE Protein FAM98A OS=Mus musculus OX=10090 GN=Fam98a PE=1 SV=1;sp|Q3TJZ6|FA98A_MOUSE Protein FAM98A OS=Mus musculus OX=10090 GN=Fam98a PE=1 SV=1	2	5	4	4	4	3	5	3	4	4	3	3	4	3	4	4	3	3	4	3	4	4	20.1	15.6	15.6	33.951	308	308;515	2.93	19	6	11	3	6	0	42.197	By MS/MS	By MS/MS	By MS/MS	By MS/MS	By MS/MS	By MS/MS
A0A3Q4EC26;A0A3Q4L2V5;Q9DCJ1;A0A3Q4L2Y8	A0A3Q4EC26;A0A3Q4L2V5;Q9DCJ1;A0A3Q4L2Y8	2;2;2;1	2;2;2;1	2;2;2;1	Target of rapamycin complex subunit LST8	Mlst8	tr|A0A3Q4EC26|A0A3Q4EC26_MOUSE Target of rapamycin complex subunit LST8 OS=Mus musculus OX=10090 GN=Mlst8 PE=1 SV=1;tr|A0A3Q4L2V5|A0A3Q4L2V5_MOUSE Target of rapamycin complex subunit LST8 OS=Mus musculus OX=10090 GN=Mlst8 PE=1 SV=1;sp|Q9DCJ1|LST8_MOUSE Tar	4	2	2	2	0	1	1	1	2	1	0	1	1	1	2	1	0	1	1	1	2	1	10.8	10.8	10.8	28.675	260	260;271;326;238	4.67		1		5		0.00041059	4.4604		By MS/MS	By MS/MS	By MS/MS	By MS/MS	By MS/MS
A0A3Q4EGB5;P06803;P06803-2	A0A3Q4EGB5;P06803;P06803-2	1;1;1	1;1;1	1;1;1	Serine/threonine-protein kinase pim-1	Pim1	tr|A0A3Q4EGB5|A0A3Q4EGB5_MOUSE Serine/threonine-protein kinase pim-1 (Fragment) OS=Mus musculus OX=10090 GN=Pim1 PE=1 SV=1;sp|P06803|PIM1_MOUSE Serine/threonine-protein kinase pim-1 OS=Mus musculus OX=10090 GN=Pim1 PE=1 SV=3;sp|P06803-2|PIM1_MOUSE Isoform	3	1	1	1	1	1	1	1	1	1	1	1	1	1	1	1	1	1	1	1	1	1	5.6	5.6	5.6	21.93	195	195;313;397	5.86				1	6	0.001316	3.0573	By MS/MS	By MS/MS	By MS/MS	By MS/MS	By MS/MS	By matching
P56213;A0A3Q4EGL6;A0A3Q4EII8	P56213;A0A3Q4EGL6;A0A3Q4EII8	4;4;2	4;4;2	4;4;2	FAD-linked sulfhydryl oxidase ALR	Gfer	sp|P56213|ALR_MOUSE FAD-linked sulfhydryl oxidase ALR OS=Mus musculus OX=10090 GN=Gfer PE=1 SV=2;tr|A0A3Q4EGL6|A0A3Q4EGL6_MOUSE Sulfhydryl oxidase OS=Mus musculus OX=10090 GN=Gfer PE=1 SV=1;tr|A0A3Q4EII8|A0A3Q4EII8_MOUSE Sulfhydryl oxidase OS=Mus musculus	3	4	4	4	4	1	4	4	2	1	4	1	4	4	2	1	4	1	4	4	2	1	22.7	22.7	22.7	22.876	198	198;187;77	2.94	5	7	1	4		0	6.8646	By MS/MS	By MS/MS	By MS/MS	By MS/MS	By MS/MS	By matching
A0A3Q4EGQ6;Q8VHA8;Q8BKL1;Q8BJJ6;Q62280;A0A3Q4EI07	A0A3Q4EGQ6;Q8VHA8;Q8BKL1;Q8BJJ6;Q62280;A0A3Q4EI07	3;3;3;3;3;2	3;3;3;3;3;2	3;3;3;3;3;2	Protein SSXT	Ss18	tr|A0A3Q4EGQ6|A0A3Q4EGQ6_MOUSE Protein SSXT OS=Mus musculus OX=10090 GN=Ss18 PE=1 SV=1;tr|Q8VHA8|Q8VHA8_MOUSE Protein SSXT OS=Mus musculus OX=10090 GN=Ss18 PE=1 SV=1;tr|Q8BKL1|Q8BKL1_MOUSE Protein SSXT OS=Mus musculus OX=10090 GN=Ss18 PE=1 SV=1;tr|Q8BJJ6|Q	6	3	3	3	3	2	3	3	2	3	3	2	3	3	2	3	3	2	3	3	2	3	59	59	59	6.9079	61	61;313;344;387;418;41	3.81	12	10	2		19	0	21.033	By MS/MS	By MS/MS	By MS/MS	By MS/MS	By MS/MS	By MS/MS
A0A3Q4EGQ9;E9QNE9;Q99JP0	A0A3Q4EGQ9;E9QNE9;Q99JP0	4;4;4	4;4;4	4;4;4	Mitogen-activated protein kinase kinase kinase kinase;Mitogen-activated protein kinase kinase kinase kinase 3	Map4k3	tr|A0A3Q4EGQ9|A0A3Q4EGQ9_MOUSE Mitogen-activated protein kinase kinase kinase kinase OS=Mus musculus OX=10090 GN=Map4k3 PE=1 SV=1;tr|E9QNE9|E9QNE9_MOUSE Mitogen-activated protein kinase kinase kinase kinase OS=Mus musculus OX=10090 GN=Map4k3 PE=1 SV=1;sp|Q	3	4	4	4	3	0	2	4	2	2	3	0	2	4	2	2	3	0	2	4	2	2	4.2	4.2	4.2	98.722	873	873;896;894	5.46			1	5	7	0.00020708	4.5953	By MS/MS		By MS/MS	By MS/MS	By MS/MS	By MS/MS
A0A3Q4EGS4	A0A3Q4EGS4	1	1	1			tr|A0A3Q4EGS4|A0A3Q4EGS4_MOUSE Transcription initiation factor TFIID subunit 4B OS=Mus musculus OX=10090 GN=Taf4b PE=1 SV=1	1	1	1	1	0	0	0	0	1	0	0	0	0	0	1	0	0	0	0	0	1	0	1.6	1.6	1.6	89.541	850	850	4			1			0.0025395	2.622					By MS/MS
A0A3Q4EGS7;Q3TN06;A0A3Q4EH67;D3Z6D5;Q6TYB5	A0A3Q4EGS7;Q3TN06;A0A3Q4EH67;D3Z6D5;Q6TYB5	2;2;2;2;2	2;2;2;2;2	2;2;2;2;2	Fasciculation and elongation protein zeta-2	Fez2	tr|A0A3Q4EGS7|A0A3Q4EGS7_MOUSE Fasciculation and elongation protein zeta-2 OS=Mus musculus OX=10090 GN=Fez2 PE=1 SV=1;tr|Q3TN06|Q3TN06_MOUSE Fasciculation and elongation protein zeta-2 OS=Mus musculus OX=10090 GN=Fez2 PE=1 SV=1;tr|A0A3Q4EH67|A0A3Q4EH67_MOU	5	2	2	2	1	2	1	1	1	1	1	2	1	1	1	1	1	2	1	1	1	1	4.5	4.5	4.5	37.192	331	331;345;373;375;348	4.14			6	1		0.0022124	2.7986	By MS/MS	By MS/MS	By MS/MS	By MS/MS	By MS/MS	By MS/MS
A0A3Q4EH04;A0A3Q4L335;A0A3Q4L393;Q8BL97-3;Q8BL97-4;Q8BL97-2;Q8BL97	A0A3Q4EH04;A0A3Q4L335;A0A3Q4L393;Q8BL97-3;Q8BL97-4;Q8BL97-2;Q8BL97	8;8;8;8;8;8;8	7;7;7;7;7;7;7	7;7;7;7;7;7;7	Serine/arginine-rich splicing factor 7	Srsf7	tr|A0A3Q4EH04|A0A3Q4EH04_MOUSE MCG17902, isoform CRA_d OS=Mus musculus OX=10090 GN=Srsf7 PE=1 SV=1;tr|A0A3Q4L335|A0A3Q4L335_MOUSE MCG17902, isoform CRA_e OS=Mus musculus OX=10090 GN=Srsf7 PE=1 SV=1;tr|A0A3Q4L393|A0A3Q4L393_MOUSE Serine/arginine-rich-splici	7	8	7	7	8	8	8	8	7	7	7	7	7	7	6	6	7	7	7	7	6	6	46	46	46	15.763	137	137;215;235;157;226;238;267	3.4	42		11	10	30	0	34.484	By MS/MS	By MS/MS	By MS/MS	By MS/MS	By MS/MS	By MS/MS
A0A3Q4L374;A0A3Q4EH84;A0A3Q4L347;P60334	A0A3Q4L374;A0A3Q4EH84;A0A3Q4L347;P60334	1;1;1;1	1;1;1;1	1;1;1;1	Cysteine dioxygenase type 1	Cdo1	tr|A0A3Q4L374|A0A3Q4L374_MOUSE Cysteine dioxygenase OS=Mus musculus OX=10090 GN=Cdo1 PE=3 SV=1;tr|A0A3Q4EH84|A0A3Q4EH84_MOUSE Cysteine dioxygenase OS=Mus musculus OX=10090 GN=Cdo1 PE=3 SV=1;tr|A0A3Q4L347|A0A3Q4L347_MOUSE Cysteine dioxygenase OS=Mus musculu	4	1	1	1	1	1	1	1	1	1	1	1	1	1	1	1	1	1	1	1	1	1	7.3	7.3	7.3	11.136	96	96;149;174;200	4	6			6	6	0.0030554	2.513	By MS/MS	By MS/MS	By MS/MS	By MS/MS	By MS/MS	By MS/MS
A0A3Q4EI12;P35293;A0A452J8C1;A0A3Q4EIF7	A0A3Q4EI12;P35293;A0A452J8C1	9;9;6;2	9;9;6;2	9;9;6;2	Ras-related protein Rab-18	Rab18	tr|A0A3Q4EI12|A0A3Q4EI12_MOUSE Ras-related protein Rab-18 OS=Mus musculus OX=10090 GN=Rab18 PE=1 SV=1;sp|P35293|RAB18_MOUSE Ras-related protein Rab-18 OS=Mus musculus OX=10090 GN=Rab18 PE=1 SV=2;tr|A0A452J8C1|A0A452J8C1_MOUSE Ras-related protein Rab-18 OS=	4	9	9	9	9	9	7	8	9	8	9	9	7	8	9	8	9	9	7	8	9	8	49.5	49.5	49.5	23.787	212	212;206;194;41	3.96	30	12	9	29	34	0	180.47	By MS/MS	By MS/MS	By MS/MS	By MS/MS	By MS/MS	By MS/MS
A0A3Q4L2S1;Q9R061;A0A3Q4EGA7;A0A3Q4EC31;A0A3Q4EIH1;A0A3Q4EH93;A0A3Q4EGU9;A0A3Q4L320	A0A3Q4L2S1;Q9R061;A0A3Q4EGA7;A0A3Q4EC31;A0A3Q4EIH1;A0A3Q4EH93;A0A3Q4EGU9	4;4;2;2;2;2;2;1	4;4;2;2;2;2;2;1	4;4;2;2;2;2;2;1	Cytosolic Fe-S cluster assembly factor NUBP2	Nubp2	tr|A0A3Q4L2S1|A0A3Q4L2S1_MOUSE Cytosolic Fe-S cluster assembly factor NUBP2 OS=Mus musculus OX=10090 GN=Nubp2 PE=1 SV=1;sp|Q9R061|NUBP2_MOUSE Cytosolic Fe-S cluster assembly factor NUBP2 OS=Mus musculus OX=10090 GN=Nubp2 PE=1 SV=1;tr|A0A3Q4EGA7|A0A3Q4EGA7_	8	4	4	4	3	3	4	3	3	3	3	3	4	3	3	3	3	3	4	3	3	3	21.5	21.5	21.5	26.861	251	251;275;50;58;133;211;245;46	3.88	12		6	17	7	0	17.055	By MS/MS	By MS/MS	By MS/MS	By MS/MS	By MS/MS	By MS/MS
A0A452J8C7;Q8K4Q8	A0A452J8C7;Q8K4Q8	4;4	4;4	4;4	Collectin-12	Colec12	tr|A0A452J8C7|A0A452J8C7_MOUSE Collectin-12 OS=Mus musculus OX=10090 GN=Colec12 PE=1 SV=1;sp|Q8K4Q8|COL12_MOUSE Collectin-12 OS=Mus musculus OX=10090 GN=Colec12 PE=1 SV=1	2	4	4	4	2	0	2	4	2	1	2	0	2	4	2	1	2	0	2	4	2	1	11.1	11.1	11.1	52.333	461	461;742	4.27		4		7		0	10.42	By MS/MS		By MS/MS	By MS/MS	By MS/MS	By MS/MS
A0A494B8X2;Q9JI90;A0A494BAP8;A0A494BBK5;A0A494B9N7;A0A494B9F3;A0A494BBA9;Q9JI90-2	A0A494B8X2;Q9JI90;A0A494BAP8;A0A494BBK5;A0A494B9N7;A0A494B9F3;A0A494BBA9;Q9JI90-2	2;2;1;1;1;1;1;1	2;2;1;1;1;1;1;1	2;2;1;1;1;1;1;1	E3 ubiquitin-protein ligase RNF14	Rnf14	tr|A0A494B8X2|A0A494B8X2_MOUSE E3 ubiquitin-protein ligase RNF14 (Fragment) OS=Mus musculus OX=10090 GN=Rnf14 PE=1 SV=1;sp|Q9JI90|RNF14_MOUSE E3 ubiquitin-protein ligase RNF14 OS=Mus musculus OX=10090 GN=Rnf14 PE=1 SV=2;tr|A0A494BAP8|A0A494BAP8_MOUSE E3 ub	8	2	2	2	2	2	2	2	2	2	2	2	2	2	2	2	2	2	2	2	2	2	12	12	12	20.374	183	183;485;49;65;87;94;102;79	4.76	3			6	8	0	7.4528	By MS/MS	By MS/MS	By MS/MS	By MS/MS	By MS/MS	By MS/MS
A0A494B932;A0A494BAT1;A0A494BB76;Q91YU6	A0A494B932;A0A494BAT1;A0A494BB76;Q91YU6	1;1;1;1	1;1;1;1	1;1;1;1	Leucine zipper putative tumor suppressor 2	Lzts2	tr|A0A494B932|A0A494B932_MOUSE Leucine zipper putative tumor suppressor 2 (Fragment) OS=Mus musculus OX=10090 GN=Lzts2 PE=1 SV=1;tr|A0A494BAT1|A0A494BAT1_MOUSE Leucine zipper putative tumor suppressor 2 (Fragment) OS=Mus musculus OX=10090 GN=Lzts2 PE=1 SV=	4	1	1	1	1	1	1	1	0	1	1	1	1	1	0	1	1	1	1	1	0	1	51.2	51.2	51.2	4.0988	41	41;42;283;671	6					5	0	5.5984	By MS/MS	By MS/MS	By MS/MS	By MS/MS		By MS/MS
A0A494BA39;A0A494B9F0;A0A494B953;A0A494BAG2;A0A494BAX0;Q8CFI0-3;Q8CFI0;A0A286YCR1	A0A494BA39;A0A494B9F0;A0A494B953;A0A494BAG2;A0A494BAX0;Q8CFI0-3;Q8CFI0;A0A286YCR1	3;3;3;3;3;3;3;2	2;2;2;2;2;2;2;2	2;2;2;2;2;2;2;2	E3 ubiquitin-protein ligase NEDD4-like	Nedd4l	tr|A0A494BA39|A0A494BA39_MOUSE E3 ubiquitin-protein ligase OS=Mus musculus OX=10090 GN=Nedd4l PE=1 SV=1;tr|A0A494B9F0|A0A494B9F0_MOUSE E3 ubiquitin-protein ligase OS=Mus musculus OX=10090 GN=Nedd4l PE=1 SV=1;tr|A0A494B953|A0A494B953_MOUSE E3 ubiquitin-prot	8	3	2	2	2	1	1	1	2	1	1	1	1	1	2	1	1	1	1	1	2	1	3.4	2.4	2.4	100.9	872	872;912;956;976;1004;984;1004;224	4.2	3	1			6	0.0016854	3.0135	By matching	By MS/MS	By MS/MS	By MS/MS	By MS/MS	By MS/MS
A0A494B9D7;Q8VE10-2;Q8VE10;Q8VE10-3	A0A494B9D7;Q8VE10-2;Q8VE10;Q8VE10-3	2;2;2;1	2;2;2;1	2;2;2;1	N-alpha-acetyltransferase 40	Naa40	tr|A0A494B9D7|A0A494B9D7_MOUSE N-alpha-acetyltransferase 40 OS=Mus musculus OX=10090 GN=Naa40 PE=1 SV=1;sp|Q8VE10-2|NAA40_MOUSE Isoform 2 of N-alpha-acetyltransferase 40 OS=Mus musculus OX=10090 GN=Naa40;sp|Q8VE10|NAA40_MOUSE N-alpha-acetyltransferase 40 O	4	2	2	2	2	0	1	1	1	1	2	0	1	1	1	1	2	0	1	1	1	1	11.5	11.5	11.5	22.321	191	191;210;237;120	5.86				1	6	0	6.9291	By MS/MS		By MS/MS	By matching	By MS/MS	By MS/MS
A0A494B9L8;A0A494B9H1;Q9EPK6	A0A494B9L8;A0A494B9H1;Q9EPK6	1;1;1	1;1;1	1;1;1	Nucleotide exchange factor SIL1	Sil1	tr|A0A494B9L8|A0A494B9L8_MOUSE Nucleotide exchange factor SIL1 (Fragment) OS=Mus musculus OX=10090 GN=Sil1 PE=1 SV=1;tr|A0A494B9H1|A0A494B9H1_MOUSE Nucleotide exchange factor SIL1 OS=Mus musculus OX=10090 GN=Sil1 PE=1 SV=1;sp|Q9EPK6|SIL1_MOUSE Nucleotide e	3	1	1	1	0	1	1	0	0	1	0	1	1	0	0	1	0	1	1	0	0	1	39.3	39.3	39.3	3.2647	28	28;417;465	4			3			0.0011299	3.0761		By MS/MS	By MS/MS			By matching
A0A494B9I7;A0A494BBK6;Q9CXX9;A0A494BBL6;A0A494BB93;A0A494BAT2	A0A494B9I7;A0A494BBK6;Q9CXX9;A0A494BBL6;A0A494BB93;A0A494BAT2	2;2;2;1;1;1	2;2;2;1;1;1	2;2;2;1;1;1	CUE domain-containing protein 2	Cuedc2	tr|A0A494B9I7|A0A494B9I7_MOUSE CUE domain-containing protein 2 (Fragment) OS=Mus musculus OX=10090 GN=Cuedc2 PE=1 SV=1;tr|A0A494BBK6|A0A494BBK6_MOUSE CUE domain-containing protein 2 (Fragment) OS=Mus musculus OX=10090 GN=Cuedc2 PE=1 SV=1;sp|Q9CXX9|CUED2_MO	6	2	2	2	1	1	2	2	1	0	1	1	2	2	1	0	1	1	2	2	1	0	18.2	18.2	18.2	18.509	170	170;195;284;106;266;273	4.29			5	2		0.00095383	3.2623	By MS/MS	By MS/MS	By MS/MS	By MS/MS	By MS/MS
A0A494B9K4;Q9QYB5-2;Q9QYB5	A0A494B9K4;Q9QYB5-2;Q9QYB5	3;3;3	3;3;3	3;3;3	Gamma-adducin	Add3	tr|A0A494B9K4|A0A494B9K4_MOUSE Gamma-adducin OS=Mus musculus OX=10090 GN=Add3 PE=1 SV=1;sp|Q9QYB5-2|ADDG_MOUSE Isoform 1 of Gamma-adducin OS=Mus musculus OX=10090 GN=Add3;sp|Q9QYB5|ADDG_MOUSE Gamma-adducin OS=Mus musculus OX=10090 GN=Add3 PE=1 SV=2	3	3	3	3	3	3	3	3	3	3	3	3	3	3	3	3	3	3	3	3	3	3	6.7	6.7	6.7	78.317	700	700;674;706	3.33	5	7	6	6		0	8.6761	By MS/MS	By MS/MS	By MS/MS	By MS/MS	By MS/MS	By MS/MS
A0A494B9L0;Q5RL57;Q9R0L7;A0A494BAS2;A0A494BBL1	A0A494B9L0;Q5RL57;Q9R0L7;A0A494BAS2;A0A494BBL1	2;2;2;1;1	2;2;2;1;1	2;2;2;1;1	A-kinase anchor protein 8-like	Akap8l	tr|A0A494B9L0|A0A494B9L0_MOUSE A-kinase anchor protein 8-like OS=Mus musculus OX=10090 GN=Akap8l PE=1 SV=1;tr|Q5RL57|Q5RL57_MOUSE A kinase (PRKA) anchor protein 8-like OS=Mus musculus OX=10090 GN=Akap8l PE=1 SV=1;sp|Q9R0L7|AKP8L_MOUSE A-kinase anchor prote	5	2	2	2	0	1	1	0	1	0	0	1	1	0	1	0	0	1	1	0	1	0	3.8	3.8	3.8	67.884	607	607;641;642;181;262	5.25		1			3	0.003752	2.4162		By MS/MS	By MS/MS		By MS/MS
A0A494B9R5;E9Q156;Q9EP82;F6YNC4;F6VLT8;A0A494BBN7	A0A494B9R5;E9Q156;Q9EP82;F6YNC4;F6VLT8;A0A494BBN7	2;2;2;1;1;1	2;2;2;1;1;1	2;2;2;1;1;1	tRNA (guanine-N(7)-)-methyltransferase non-catalytic subunit Wdr4;tRNA (guanine-N(7)-)-methyltransferase non-catalytic subunit WDR4	Wdr4	tr|A0A494B9R5|A0A494B9R5_MOUSE tRNA (guanine-N(7)-)-methyltransferase non-catalytic subunit WDR4 (Fragment) OS=Mus musculus OX=10090 GN=Wdr4 PE=1 SV=1;tr|E9Q156|E9Q156_MOUSE tRNA (guanine-N(7)-)-methyltransferase non-catalytic subunit WDR4 OS=Mus musculus	6	2	2	2	2	2	2	2	1	2	2	2	2	2	1	2	2	2	2	2	1	2	7.5	7.5	7.5	46.879	426	426;456;413;102;107;120	3.14	5	5	9	2		0	6.9578	By MS/MS	By MS/MS	By MS/MS	By MS/MS	By MS/MS	By MS/MS
A0A494B9T4;A0A494B9V4;A0A494BAH9;A0A494BAD9;Q91WA4	A0A494B9T4;A0A494B9V4;A0A494BAH9;A0A494BAD9;Q91WA4	2;2;2;2;2	2;2;2;2;2	2;2;2;2;2	CXXC-type zinc finger protein 5	Cxxc5	tr|A0A494B9T4|A0A494B9T4_MOUSE CXXC-type zinc finger protein 5 (Fragment) OS=Mus musculus OX=10090 GN=Cxxc5 PE=1 SV=1;tr|A0A494B9V4|A0A494B9V4_MOUSE CXXC-type zinc finger protein 5 (Fragment) OS=Mus musculus OX=10090 GN=Cxxc5 PE=1 SV=1;tr|A0A494BAH9|A0A494	5	2	2	2	1	2	1	2	1	1	1	2	1	2	1	1	1	2	1	2	1	1	21.9	21.9	21.9	14.664	151	151;205;211;222;317	5			4		4	0	6.1729	By MS/MS	By MS/MS	By MS/MS	By MS/MS	By MS/MS	By matching
A0A494B9U1;Q7TSH3	A0A494B9U1;Q7TSH3	1;1	1;1	1;1	Zinc finger protein 516	Znf516	tr|A0A494B9U1|A0A494B9U1_MOUSE Zinc finger protein 516 (Fragment) OS=Mus musculus OX=10090 GN=Zfp516 PE=1 SV=1;sp|Q7TSH3|ZN516_MOUSE Zinc finger protein 516 OS=Mus musculus OX=10090 GN=Znf516 PE=1 SV=1	2	1	1	1	1	1	0	1	1	0	1	1	0	1	1	0	1	1	0	1	1	0	7.7	7.7	7.7	20.602	194	194;1157	5				4		0.0016867	3.0297	By MS/MS	By matching		By MS/MS	By MS/MS
A0A494B9V8;A0A494BBC8;E9QAB6	A0A494B9V8	5;2;1	5;2;1	5;2;1			tr|A0A494B9V8|A0A494B9V8_MOUSE Protein prenyltransferase alpha subunit repeat-containing 1 OS=Mus musculus OX=10090 GN=Ptar1 PE=1 SV=1	3	5	5	5	4	4	2	3	1	3	4	4	2	3	1	3	4	4	2	3	1	3	13.7	13.7	13.7	48.29	424	424;200;66	5.43			2	8	11	0	13.194	By MS/MS	By MS/MS	By MS/MS	By MS/MS	By MS/MS	By MS/MS
E0CX79;E0CXR3;E0CZD9;E0CXM9;A0A494B9Y9;Q9DB43	E0CX79;E0CXR3;E0CZD9;E0CXM9;A0A494B9Y9;Q9DB43	1;1;1;1;1;1	1;1;1;1;1;1	1;1;1;1;1;1	Zinc finger protein-like 1	Zfpl1	tr|E0CX79|E0CX79_MOUSE Zinc finger protein-like 1 (Fragment) OS=Mus musculus OX=10090 GN=Zfpl1 PE=1 SV=1;tr|E0CXR3|E0CXR3_MOUSE Zinc finger protein-like 1 (Fragment) OS=Mus musculus OX=10090 GN=Zfpl1 PE=1 SV=8;tr|E0CZD9|E0CZD9_MOUSE Zinc finger protein-lik	6	1	1	1	1	1	1	1	1	1	1	1	1	1	1	1	1	1	1	1	1	1	6.2	6.2	6.2	14.509	129	129;182;242;264;306;310	3.73	5				6	0.0080279	2.1008	By MS/MS	By MS/MS	By MS/MS	By MS/MS	By MS/MS	By MS/MS
A0A494B9Z0;A0A494BBA8;Q642K5;P62862	A0A494B9Z0;A0A494BBA8;Q642K5;P62862	3;3;3;3	3;3;3;3	3;3;3;3	40S ribosomal protein S30	Fau	tr|A0A494B9Z0|A0A494B9Z0_MOUSE 40S ribosomal protein S30 OS=Mus musculus OX=10090 GN=Fau PE=1 SV=1;tr|A0A494BBA8|A0A494BBA8_MOUSE 40S ribosomal protein S30 OS=Mus musculus OX=10090 GN=Fau PE=1 SV=1;tr|Q642K5|Q642K5_MOUSE 40S ribosomal protein S30 OS=Mus mu	4	3	3	3	3	3	3	3	3	3	3	3	3	3	3	3	3	3	3	3	3	3	19	19	19	7.0062	63	63;98;133;59	3.04	29			6	16	0	10.755	By MS/MS	By MS/MS	By MS/MS	By MS/MS	By MS/MS	By MS/MS
A0A494BAX1;A0A494BA07;Q8BUY9	A0A494BAX1;A0A494BA07;Q8BUY9	1;1;1	1;1;1	1;1;1	Geranylgeranyl transferase type-1 subunit beta	Pggt1b	tr|A0A494BAX1|A0A494BAX1_MOUSE Geranylgeranyl transferase type-1 subunit beta (Fragment) OS=Mus musculus OX=10090 GN=Pggt1b PE=1 SV=1;tr|A0A494BA07|A0A494BA07_MOUSE Geranylgeranyl transferase type-1 subunit beta OS=Mus musculus OX=10090 GN=Pggt1b PE=1 SV=1	3	1	1	1	1	1	1	1	1	1	1	1	1	1	1	1	1	1	1	1	1	1	8.4	8.4	8.4	11.984	107	107;300;377	6					6	0.0042819	2.3958	By MS/MS	By MS/MS	By MS/MS	By MS/MS	By MS/MS	By MS/MS
A0A494BA33;Q3TH01;P14428;P04223-2;P03991;P04223;P01901;A0A0B4J1G3;A0A494B9G8;G3UXW2;A0A494BAT0;P14426	A0A494BA33;Q3TH01;P14428;P04223-2;P03991;P04223;P01901;A0A0B4J1G3;A0A494B9G8;G3UXW2;A0A494BAT0;P14426	2;2;2;2;2;2;2;1;1;1;1;1	2;2;2;2;2;2;2;1;1;1;1;1	2;2;2;2;2;2;2;1;1;1;1;1	H-2 class I histocompatibility antigen, K-Q alpha chain;H-2 class I histocompatibility antigen, K-K alpha chain;H-2 class I histocompatibility antigen, K-W28 alpha chain;H-2 class I histocompatibility antigen, K-B alpha chain;Beta-2-microglobulin;H-2 class I histocompatibility antigen, D-K alpha chain	H2-K1;H2-D1	tr|A0A494BA33|A0A494BA33_MOUSE H-2 class I histocompatibility antigen, K-K alpha chain (Fragment) OS=Mus musculus OX=10090 GN=H2-K1 PE=1 SV=1;tr|Q3TH01|Q3TH01_MOUSE H-2 class I histocompatibility antigen, K-K alpha chain OS=Mus musculus OX=10090 GN=H2-K1 P	12	2	2	2	1	1	0	2	2	1	1	1	0	2	2	1	1	1	0	2	2	1	9.6	9.6	9.6	39.859	355	355;360;328;360;368;369;369;187;190;289;356;362	4.67		4			5	0.00021322	5.0648	By MS/MS	By MS/MS		By MS/MS	By MS/MS	By MS/MS
Q62422;A0A494BA97;A0A494B943	Q62422;A0A494BA97	5;5;1	5;5;1	5;5;1	Osteoclast-stimulating factor 1	Ostf1	sp|Q62422|OSTF1_MOUSE Osteoclast-stimulating factor 1 OS=Mus musculus OX=10090 GN=Ostf1 PE=1 SV=2;tr|A0A494BA97|A0A494BA97_MOUSE Osteoclast-stimulating factor 1 OS=Mus musculus OX=10090 GN=Ostf1 PE=1 SV=1	3	5	5	5	5	4	4	4	3	4	5	4	4	4	3	4	5	4	4	4	3	4	29.3	29.3	29.3	23.782	215	215;212;38	3.52	19		2	10	13	0	118.9	By MS/MS	By MS/MS	By MS/MS	By MS/MS	By MS/MS	By MS/MS
A0A494BAB5;Q9D5T0;A0A494B9Y0;A0A494B9L7	A0A494BAB5;Q9D5T0;A0A494B9Y0;A0A494B9L7	8;8;6;5	8;8;6;5	8;8;6;5	ATPase family AAA domain-containing protein 1	Atad1	tr|A0A494BAB5|A0A494BAB5_MOUSE ATPase family AAA domain-containing protein 1 OS=Mus musculus OX=10090 GN=Atad1 PE=1 SV=1;sp|Q9D5T0|ATAD1_MOUSE ATPase family AAA domain-containing protein 1 OS=Mus musculus OX=10090 GN=Atad1 PE=1 SV=1;tr|A0A494B9Y0|A0A494B9Y	4	8	8	8	6	6	6	6	4	5	6	6	6	6	4	5	6	6	6	6	4	5	43.1	43.1	43.1	31.071	276	276;361;322;303	3.68	24		12	14	18	0	70.488	By MS/MS	By MS/MS	By MS/MS	By MS/MS	By MS/MS	By MS/MS
F6T2S0;Q91W09;A0A494BAI5;Q544X6;P22315;A0A494BBL4;A0A494B9Y8;A0A494BAR8	F6T2S0;Q91W09;A0A494BAI5;Q544X6;P22315;A0A494BBL4;A0A494B9Y8	3;3;3;3;3;2;2;1	3;3;3;3;3;2;2;1	3;3;3;3;3;2;2;1	Ferrochelatase;Ferrochelatase, mitochondrial	Fech	tr|F6T2S0|F6T2S0_MOUSE Ferrochelatase OS=Mus musculus OX=10090 GN=Fech PE=1 SV=1;tr|Q91W09|Q91W09_MOUSE Ferrochelatase OS=Mus musculus OX=10090 GN=Fech PE=1 SV=1;tr|A0A494BAI5|A0A494BAI5_MOUSE Ferrochelatase OS=Mus musculus OX=10090 GN=Fech PE=1 SV=1;tr|Q5	8	3	3	3	3	3	3	3	3	2	3	3	3	3	3	2	3	3	3	3	3	2	10.3	10.3	10.3	39.594	348	348;395;417;422;420;215;366;149	4.68	3		2	14	6	0	5.5231	By MS/MS	By MS/MS	By MS/MS	By MS/MS	By MS/MS	By MS/MS
A0A494BB58;A0A494BAJ5;A0A494BBF1;Q9WU84	A0A494BB58;A0A494BAJ5;A0A494BBF1;Q9WU84	4;4;4;4	4;4;4;4	4;4;4;4	Copper chaperone for superoxide dismutase	Ccs	tr|A0A494BB58|A0A494BB58_MOUSE Copper chaperone for superoxide dismutase OS=Mus musculus OX=10090 GN=Ccs PE=1 SV=1;tr|A0A494BAJ5|A0A494BAJ5_MOUSE Superoxide dismutase [Cu-Zn] OS=Mus musculus OX=10090 GN=Ccs PE=1 SV=1;tr|A0A494BBF1|A0A494BBF1_MOUSE Copper c	4	4	4	4	2	3	2	2	2	3	2	3	2	2	2	3	2	3	2	2	2	3	21.9	21.9	21.9	24.23	228	228;228;267;274	4.58	4			7	8	0	14.622	By MS/MS	By MS/MS	By MS/MS	By MS/MS	By MS/MS	By MS/MS
A0A494BAJ6;Q9WUL7	A0A494BAJ6;Q9WUL7	4;4	4;4	4;4	ADP-ribosylation factor-like protein 3	Arl3	tr|A0A494BAJ6|A0A494BAJ6_MOUSE ADP-ribosylation factor-like protein 3 OS=Mus musculus OX=10090 GN=Arl3 PE=1 SV=1;sp|Q9WUL7|ARL3_MOUSE ADP-ribosylation factor-like protein 3 OS=Mus musculus OX=10090 GN=Arl3 PE=1 SV=1	2	4	4	4	4	4	4	4	3	4	4	4	4	4	3	4	4	4	4	4	3	4	32.8	32.8	32.8	20.227	180	180;182	3.77	18			15	14	0	20.508	By MS/MS	By MS/MS	By MS/MS	By MS/MS	By MS/MS	By MS/MS
F6SLP4;A0A494BAW5;A0A494BAK4;Q9DC16;A0A494BAX4;A0A494B9M5;F6Z6A5	F6SLP4;A0A494BAW5;A0A494BAK4;Q9DC16;A0A494BAX4	4;4;4;4;2;1;1	4;4;4;4;2;1;1	4;4;4;4;2;1;1	Endoplasmic reticulum-Golgi intermediate compartment protein 1	Ergic1	tr|F6SLP4|F6SLP4_MOUSE Endoplasmic reticulum-Golgi intermediate compartment protein 1 OS=Mus musculus OX=10090 GN=Ergic1 PE=1 SV=2;tr|A0A494BAW5|A0A494BAW5_MOUSE Endoplasmic reticulum-Golgi intermediate compartment protein 1 OS=Mus musculus OX=10090 GN=Erg	7	4	4	4	4	4	4	3	3	4	4	4	4	3	3	4	4	4	4	3	3	4	26.7	26.7	26.7	21.445	191	191;198;247;290;100;46;138	2.74	16	3	11		4	0	9.1084	By MS/MS	By MS/MS	By MS/MS	By MS/MS	By MS/MS	By MS/MS
A0A494BAL0;A0A494BAY5;Q9Z0F6	A0A494BAL0;A0A494BAY5;Q9Z0F6	1;1;1	1;1;1	1;1;1	Cell cycle checkpoint control protein RAD9A	Rad9a	tr|A0A494BAL0|A0A494BAL0_MOUSE Cell cycle checkpoint control protein RAD9A OS=Mus musculus OX=10090 GN=Rad9a PE=1 SV=1;tr|A0A494BAY5|A0A494BAY5_MOUSE Cell cycle checkpoint control protein RAD9A (Fragment) OS=Mus musculus OX=10090 GN=Rad9a PE=1 SV=1;sp|Q9Z0	3	1	1	1	0	1	0	1	1	1	0	1	0	1	1	1	0	1	0	1	1	1	15.1	15.1	15.1	8.0122	73	73;144;389	4			5			0	8.7034		By MS/MS		By MS/MS	By MS/MS	By matching
A0A494BAZ4;P99029-2;P99029;G3UZJ4;H3BJQ7	A0A494BAZ4;P99029-2;P99029;G3UZJ4;H3BJQ7	6;6;6;5;4	6;6;6;5;4	6;6;6;5;4	Peroxiredoxin-5, mitochondrial	Prdx5	tr|A0A494BAZ4|A0A494BAZ4_MOUSE Peroxiredoxin (Fragment) OS=Mus musculus OX=10090 GN=Prdx5 PE=1 SV=1;sp|P99029-2|PRDX5_MOUSE Isoform Cytoplasmic+peroxisomal of Peroxiredoxin-5, mitochondrial OS=Mus musculus OX=10090 GN=Prdx5;sp|P99029|PRDX5_MOUSE Peroxiredo	5	6	6	6	6	6	6	6	4	6	6	6	6	6	4	6	6	6	6	6	4	6	47.2	47.2	47.2	14.929	142	142;162;210;166;213	3.25	33	6	14	1	23	0	30.953	By MS/MS	By MS/MS	By MS/MS	By MS/MS	By MS/MS	By MS/MS
A0A494BB10	A0A494BB10	3	3	3			tr|A0A494BB10|A0A494BB10_MOUSE Uncharacterized protein OS=Mus musculus OX=10090 GN=Gm50478 PE=4 SV=1	1	3	3	3	3	2	2	2	2	1	3	2	2	2	2	1	3	2	2	2	2	1	23.2	23.2	23.2	11.148	99	99	3.81	1	5	6	3	1	0	7.5904	By MS/MS	By MS/MS	By MS/MS	By MS/MS	By MS/MS	By MS/MS
A0A494BB15;Q91ZJ0;F6VIY4;F8WIN9	A0A494BB15;Q91ZJ0;F6VIY4;F8WIN9	2;2;1;1	2;2;1;1	2;2;1;1	Crossover junction endonuclease MUS81	Mus81	tr|A0A494BB15|A0A494BB15_MOUSE Crossover junction endonuclease MUS81 (Fragment) OS=Mus musculus OX=10090 GN=Mus81 PE=1 SV=1;sp|Q91ZJ0|MUS81_MOUSE Crossover junction endonuclease MUS81 OS=Mus musculus OX=10090 GN=Mus81 PE=1 SV=2;tr|F6VIY4|F6VIY4_MOUSE Cross	4	2	2	2	1	2	1	0	2	1	1	2	1	0	2	1	1	2	1	0	2	1	18.5	18.5	18.5	14.316	130	130;551;389;502	5.43				4	3	0.00040858	4.3739	By MS/MS	By MS/MS	By MS/MS		By MS/MS	By matching
A0A494BB30;Q62084;A0A494B933;A0A494B9R1	A0A494BB30;Q62084;A0A494B933;A0A494B9R1	3;3;2;2	3;3;2;2	3;3;2;2	Protein phosphatase 1 regulatory subunit 14B	Ppp1r14b	tr|A0A494BB30|A0A494BB30_MOUSE Protein phosphatase 1 regulatory subunit 14B OS=Mus musculus OX=10090 GN=Ppp1r14b PE=1 SV=1;sp|Q62084|PP14B_MOUSE Protein phosphatase 1 regulatory subunit 14B OS=Mus musculus OX=10090 GN=Ppp1r14b PE=1 SV=2;tr|A0A494B933|A0A49	4	3	3	3	3	3	3	2	2	2	3	3	3	2	2	2	3	3	3	2	2	2	26.7	26.7	26.7	21.162	202	202;147;94;181	3.28	7	9		6	3	0	43.853	By MS/MS	By MS/MS	By MS/MS	By MS/MS	By MS/MS	By MS/MS
E0CYH4;A0A494BB75;Q8C6G8	E0CYH4;A0A494BB75;Q8C6G8	3;3;3	3;3;3	3;3;3	WD repeat-containing protein 26	Wdr26	tr|E0CYH4|E0CYH4_MOUSE WD repeat-containing protein 26 (Fragment) OS=Mus musculus OX=10090 GN=Wdr26 PE=1 SV=1;tr|A0A494BB75|A0A494BB75_MOUSE WD repeat-containing protein 26 OS=Mus musculus OX=10090 GN=Wdr26 PE=1 SV=1;sp|Q8C6G8|WDR26_MOUSE WD repeat-contain	3	3	3	3	3	1	3	2	2	3	3	1	3	2	2	3	3	1	3	2	2	3	5.4	5.4	5.4	68.879	625	625;729;641	5.57			3		11	0	11.247	By MS/MS	By MS/MS	By MS/MS	By MS/MS	By MS/MS	By MS/MS
A0A494BB84;Q3U4F0;Q91V61-2;Q91V61	A0A494BB84;Q3U4F0;Q91V61-2;Q91V61	3;3;3;3	3;3;3;3	3;3;3;3	Sideroflexin-3	Sfxn3	tr|A0A494BB84|A0A494BB84_MOUSE Sideroflexin-3 (Fragment) OS=Mus musculus OX=10090 GN=Sfxn3 PE=1 SV=1;tr|Q3U4F0|Q3U4F0_MOUSE Sideroflexin-3 OS=Mus musculus OX=10090 GN=Sfxn3 PE=1 SV=1;sp|Q91V61-2|SFXN3_MOUSE Isoform 2 of Sideroflexin-3 OS=Mus musculus OX=10	4	3	3	3	1	3	3	2	3	3	1	3	3	2	3	3	1	3	3	2	3	3	31.8	31.8	31.8	12.494	110	110;281;288;321	4.04	6	4		11	6	0	8.5134	By MS/MS	By MS/MS	By MS/MS	By MS/MS	By MS/MS	By MS/MS
A0A494BB95;Q60872	A0A494BB95;Q60872	3;3	1;1	1;1	Eukaryotic translation initiation factor 1A	Eif1a	tr|A0A494BB95|A0A494BB95_MOUSE Eukaryotic translation initiation factor 1A OS=Mus musculus OX=10090 GN=Eif1a PE=1 SV=1;sp|Q60872|IF1A_MOUSE Eukaryotic translation initiation factor 1A OS=Mus musculus OX=10090 GN=Eif1a PE=2 SV=3	2	3	1	1	3	3	3	3	3	2	1	1	1	1	1	0	1	1	1	1	1	0	14.6	6.3	6.3	28.612	254	254;144	1	5					0.0023915	2.7825	By MS/MS	By MS/MS	By MS/MS	By matching	By MS/MS	By matching
A0A494BBB0;O35350;A0A494BAC4;A0A494BAS0	A0A494BBB0;O35350	10;10;1;1	10;10;1;1	10;10;1;1	Calpain-1 catalytic subunit	Capn1	tr|A0A494BBB0|A0A494BBB0_MOUSE Calpain-1 catalytic subunit (Fragment) OS=Mus musculus OX=10090 GN=Capn1 PE=1 SV=1;sp|O35350|CAN1_MOUSE Calpain-1 catalytic subunit OS=Mus musculus OX=10090 GN=Capn1 PE=1 SV=1	4	10	10	10	9	8	9	9	8	7	9	8	9	9	8	7	9	8	9	9	8	7	15.5	15.5	15.5	80.362	699	699;713;79;196	3.77	17	18	8	19	16	0	49.584	By MS/MS	By MS/MS	By MS/MS	By MS/MS	By MS/MS	By MS/MS
R4H4V1;A0A494BBD3;R4H4Y7;Q9EQC5;A0A494BBM6;A0A494B997;A0A494B9K7;A0A494BAG4	R4H4V1;A0A494BBD3;R4H4Y7;Q9EQC5	14;14;14;14;3;2;1;1	14;14;14;14;3;2;1;1	14;14;14;14;3;2;1;1	N-terminal kinase-like protein	Scyl1	tr|R4H4V1|R4H4V1_MOUSE N-terminal kinase-like protein OS=Mus musculus OX=10090 GN=Scyl1 PE=1 SV=1;tr|A0A494BBD3|A0A494BBD3_MOUSE N-terminal kinase-like protein (Fragment) OS=Mus musculus OX=10090 GN=Scyl1 PE=1 SV=1;tr|R4H4Y7|R4H4Y7_MOUSE N-terminal kinase-	8	14	14	14	12	10	8	8	9	8	12	10	8	8	9	8	12	10	8	8	9	8	27.4	27.4	27.4	82.463	749	749;775;789;806;226;195;39;48	3.88	9	11	16	17	7	0	54.46	By MS/MS	By MS/MS	By MS/MS	By MS/MS	By MS/MS	By MS/MS
A0A498WGD8;Q8CDN6;A0A494B955;A0A494BBI1;A0A494BB31	A0A498WGD8;Q8CDN6;A0A494B955;A0A494BBI1	15;15;10;9;4	15;15;10;9;4	15;15;10;9;4	Thioredoxin-like protein 1	Txnl1	tr|A0A498WGD8|A0A498WGD8_MOUSE Thioredoxin-like protein 1 OS=Mus musculus OX=10090 GN=Txnl1 PE=1 SV=1;sp|Q8CDN6|TXNL1_MOUSE Thioredoxin-like protein 1 OS=Mus musculus OX=10090 GN=Txnl1 PE=1 SV=3;tr|A0A494B955|A0A494B955_MOUSE Thioredoxin-like 1, isoform CR	5	15	15	15	15	12	14	14	12	13	15	12	14	14	12	13	15	12	14	14	12	13	63.7	63.7	63.7	32.715	292	292;289;259;243;91	3.66	70	19	40	83	32	0	155.51	By MS/MS	By MS/MS	By MS/MS	By MS/MS	By MS/MS	By MS/MS
Q6ZPK0;Q6ZPK0-6;E9QKW9;Q6ZPK0-3;A2AHG4;E9PV92;Q6ZPK0-8;A0A498WGG5;F6U6L3;F6URE6;Q6ZPK0-2;A2AHG3;D3Z764;F6TL54;Q6ZPK0-4;Q6ZPK0-7;Q6ZPK0-5;Q6ZPK0-9	Q6ZPK0;Q6ZPK0-6;E9QKW9;Q6ZPK0-3;A2AHG4;E9PV92;Q6ZPK0-8;A0A498WGG5;F6U6L3	3;3;3;3;3;3;3;3;2;1;1;1;1;1;1;1;1;1	3;3;3;3;3;3;3;3;2;1;1;1;1;1;1;1;1;1	3;3;3;3;3;3;3;3;2;1;1;1;1;1;1;1;1;1	PHD finger protein 21A	Phf21a	sp|Q6ZPK0|PF21A_MOUSE PHD finger protein 21A OS=Mus musculus OX=10090 GN=Phf21a PE=1 SV=3;sp|Q6ZPK0-6|PF21A_MOUSE Isoform 6 of PHD finger protein 21A OS=Mus musculus OX=10090 GN=Phf21a;tr|E9QKW9|E9QKW9_MOUSE PHD finger protein 21A OS=Mus musculus OX=10090	18	3	3	3	3	1	1	2	2	1	3	1	1	2	2	1	3	1	1	2	2	1	6.5	6.5	6.5	75.596	688	688;599;659;646;641;611;610;688;185;575;604;556;604;189;556;526;515;562	4.18		1	7	3		0	9.1982	By MS/MS	By MS/MS	By MS/MS	By MS/MS	By MS/MS	By MS/MS
A0A498WGK2;Q8BP47;A0A494BB89;A0A494BAX5;A0A494BAW6;A0A494B996;A0A494B927;A0A494B9G0;A0A494B949	A0A498WGK2;Q8BP47;A0A494BB89;A0A494BAX5	19;19;14;13;6;5;5;3;3	19;19;14;13;6;5;5;3;3	19;19;14;13;6;5;5;3;3	Asparagine--tRNA ligase, cytoplasmic	Nars	tr|A0A498WGK2|A0A498WGK2_MOUSE Asparagine--tRNA ligase, cytoplasmic OS=Mus musculus OX=10090 GN=Nars PE=1 SV=1;sp|Q8BP47|SYNC_MOUSE Asparagine--tRNA ligase, cytoplasmic OS=Mus musculus OX=10090 GN=Nars PE=1 SV=2;tr|A0A494BB89|A0A494BB89_MOUSE Asparagine--t	9	19	19	19	17	17	16	18	16	16	17	17	16	18	16	16	17	17	16	18	16	16	32.3	32.3	32.3	64.208	558	558;559;517;497;164;127;210;69;70	3.62	78	19	24	69	47	0	178.07	By MS/MS	By MS/MS	By MS/MS	By MS/MS	By MS/MS	By MS/MS
A0A498WGK6;Q9ET30	A0A498WGK6;Q9ET30	3;3	3;3	3;3	Transmembrane 9 superfamily member 3	Tm9sf3	tr|A0A498WGK6|A0A498WGK6_MOUSE Transmembrane 9 superfamily member OS=Mus musculus OX=10090 GN=Tm9sf3 PE=1 SV=1;sp|Q9ET30|TM9S3_MOUSE Transmembrane 9 superfamily member 3 OS=Mus musculus OX=10090 GN=Tm9sf3 PE=1 SV=1	2	3	3	3	1	1	2	1	0	3	1	1	2	1	0	3	1	1	2	1	0	3	5.7	5.7	5.7	67.507	584	584;587	3.67	2		4	3		0.00021164	4.9393	By MS/MS	By MS/MS	By matching	By MS/MS		By MS/MS
A0A4W7N3B2;Q6SKR2;Q6SKR2-2;Q6SKR2-3	A0A4W7N3B2;Q6SKR2;Q6SKR2-2;Q6SKR2-3	2;2;1;1	2;2;1;1	2;2;1;1		N6amt1	tr|A0A4W7N3B2|A0A4W7N3B2_MOUSE Methyltransferase N6AMT1 OS=Mus musculus OX=10090 GN=N6amt1 PE=1 SV=1;sp|Q6SKR2|N6MT1_MOUSE Methyltransferase N6AMT1 OS=Mus musculus OX=10090 GN=N6amt1 PE=1 SV=1;sp|Q6SKR2-2|N6MT1_MOUSE Isoform 2 of Methyltransferase N6AMT1 O	4	2	2	2	2	1	1	1	1	2	2	1	1	1	1	2	2	1	1	1	1	2	13.3	13.3	13.3	19.286	181	181;214;138;150	5.5				4	4	0.005305	2.2824	By matching	By MS/MS	By MS/MS	By MS/MS	By matching	By MS/MS
A0A571BD95;Q9ES00;G3UZD6;G3UZM6;H7BXC2	A0A571BD95;Q9ES00;G3UZD6	16;16;12;5;2	16;16;12;5;2	16;16;12;5;2	Ubiquitin conjugation factor E4 B	Ube4b	tr|A0A571BD95|A0A571BD95_MOUSE Ubiquitin conjugation factor E4 B OS=Mus musculus OX=10090 GN=Ube4b PE=4 SV=1;sp|Q9ES00|UBE4B_MOUSE Ubiquitin conjugation factor E4 B OS=Mus musculus OX=10090 GN=Ube4b PE=1 SV=3;tr|G3UZD6|G3UZD6_MOUSE Ubiquitin conjugation fa	5	16	16	16	13	11	12	13	13	9	13	11	12	13	13	9	13	11	12	13	13	9	14.5	14.5	14.5	147.07	1307	1307;1173;998;409;128	4.23	21	11	25	21	40	0	71.005	By MS/MS	By MS/MS	By MS/MS	By MS/MS	By MS/MS	By MS/MS
J3KMS0;A0A571BDT7;L7MUC9;B1AVN5;Q32P14;F6VKC7;H3BLB0;A2A7A1	J3KMS0;A0A571BDT7;L7MUC9;B1AVN5;Q32P14;F6VKC7;H3BLB0;A2A7A1	1;1;1;1;1;1;1;1	1;1;1;1;1;1;1;1	1;1;1;1;1;1;1;1		Gm21411;Gm13235;Gm13225;Gm13051;Gm13151;Gm13150;Zfp534	tr|J3KMS0|J3KMS0_MOUSE Predicted gene, 21411 OS=Mus musculus OX=10090 GN=Gm21411 PE=4 SV=1;tr|A0A571BDT7|A0A571BDT7_MOUSE Predicted gene, 21411 (Fragment) OS=Mus musculus OX=10090 GN=Gm21411 PE=4 SV=1;tr|L7MUC9|L7MUC9_MOUSE Zinc finger protein 986 (Fragmen	8	1	1	1	1	1	1	0	0	0	1	1	1	0	0	0	1	1	1	0	0	0	11	11	11	15.934	136	136;373;401;605;633;633;661;661	6					3	0	6.9396	By MS/MS	By MS/MS	By MS/MS
A0A571BET4;A0A571BGG1;A0A571BEF4;Q91X43;Q91X43-2	A0A571BET4;A0A571BGG1;A0A571BEF4;Q91X43;Q91X43-2	3;3;3;3;2	3;3;3;3;2	3;3;3;3;2	SH3 domain-containing protein 19	Sh3d19	tr|A0A571BET4|A0A571BET4_MOUSE SH3 domain-containing protein 19 OS=Mus musculus OX=10090 GN=Sh3d19 PE=4 SV=1;tr|A0A571BGG1|A0A571BGG1_MOUSE SH3 domain-containing protein 19 OS=Mus musculus OX=10090 GN=Sh3d19 PE=4 SV=1;tr|A0A571BEF4|A0A571BEF4_MOUSE SH3 dom	5	3	3	3	1	1	2	0	2	0	1	1	2	0	2	0	1	1	2	0	2	0	5.9	5.9	5.9	79.617	730	730;1006;1065;789;420	4.17		1	4		1	0	6.5884	By MS/MS	By MS/MS	By MS/MS		By MS/MS
Q63ZW7;A0A571BEG7;A2ADS6;Q63ZW7-6;A2ADS8;Q63ZW7-5;Q63ZW7-2;Q63ZW7-4;Q63ZW7-3;Q8VBX6-2;A3KG84;B2RQR2;F6RSZ8;Q8VBX6;Q8VBX6-4;D3YUX2;A3KG83	Q63ZW7;A0A571BEG7;A2ADS6;Q63ZW7-6;A2ADS8;Q63ZW7-5	7;7;7;5;4;4;3;2;2;1;1;1;1;1;1;1;1	7;7;7;5;4;4;3;2;2;1;1;1;1;1;1;1;1	7;7;7;5;4;4;3;2;2;1;1;1;1;1;1;1;1	InaD-like protein	Inadl	sp|Q63ZW7|INADL_MOUSE InaD-like protein OS=Mus musculus OX=10090 GN=Patj PE=1 SV=2;tr|A0A571BEG7|A0A571BEG7_MOUSE InaD-like protein OS=Mus musculus OX=10090 GN=Patj PE=4 SV=1;tr|A2ADS6|A2ADS6_MOUSE InaD-like protein OS=Mus musculus OX=10090 GN=Patj PE=1 SV	17	7	7	7	5	5	5	4	5	4	5	5	5	4	5	4	5	5	5	4	5	4	5.5	5.5	5.5	198.51	1834	1834;1858;1531;975;902;598;1261;582;612;2022;495;2069;454;2055;2057;2056;209	4.8	5			11	14	0	13.132	By MS/MS	By MS/MS	By MS/MS	By MS/MS	By MS/MS	By MS/MS
A0A571BEI2;Q6PIU9	A0A571BEI2;Q6PIU9	5;4	4;4	4;4	Uncharacterized protein FLJ45252 homolog		tr|A0A571BEI2|A0A571BEI2_MOUSE AP2-associated protein kinase 1 (Fragment) OS=Mus musculus OX=10090 GN=Aak1 PE=4 SV=1;sp|Q6PIU9|YJ005_MOUSE Uncharacterized protein FLJ45252 homolog OS=Mus musculus OX=10090 PE=1 SV=2	2	5	4	4	3	3	5	3	3	2	2	2	4	2	2	1	2	2	4	2	2	1	13.7	12	12	53.987	510	510;354	3.5	4	4	4	5	1	0	5.8031	By MS/MS	By matching	By MS/MS	By MS/MS	By MS/MS	By matching
A0A571BEV2;F6VUT6	A0A571BEV2	3;1	3;1	3;1			tr|A0A571BEV2|A0A571BEV2_MOUSE Predicted gene 8251 OS=Mus musculus OX=10090 GN=Gm8251 PE=4 SV=1	2	3	3	3	2	0	1	2	1	2	2	0	1	2	1	2	2	0	1	2	1	2	0.5	0.5	0.5	747.31	6590	6590;1994	3.56	4		1		4	0.0078726	2.1228	By MS/MS		By MS/MS	By MS/MS	By MS/MS	By matching
A0A571BEW4;A0A571BES1;Q9JME5	A0A571BEW4;A0A571BES1;Q9JME5	5;4;4	4;3;3	4;3;3	AP-3 complex subunit beta-2	Ap3b2	tr|A0A571BEW4|A0A571BEW4_MOUSE AP-3 complex subunit beta-2 OS=Mus musculus OX=10090 GN=Ap3b2 PE=4 SV=1;tr|A0A571BES1|A0A571BES1_MOUSE AP-3 complex subunit beta-2 OS=Mus musculus OX=10090 GN=Ap3b2 PE=4 SV=1;sp|Q9JME5|AP3B2_MOUSE AP-3 complex subunit beta-2	3	5	4	4	3	2	3	3	2	2	2	1	2	2	2	1	2	1	2	2	2	1	4.7	3.9	3.9	115.44	1050	1050;1101;1082	5.2			2	4	4	0	8.7238	By MS/MS	By matching	By MS/MS	By MS/MS	By MS/MS	By matching
A0A571BFA7;Q148V8	A0A571BFA7;Q148V8	4;4	4;4	4;4	Protein FAM83H	Fam83h	tr|A0A571BFA7|A0A571BFA7_MOUSE Protein FAM83H OS=Mus musculus OX=10090 GN=Fam83h PE=4 SV=1;sp|Q148V8|FA83H_MOUSE Protein FAM83H OS=Mus musculus OX=10090 GN=Fam83h PE=1 SV=1	2	4	4	4	4	3	3	3	3	1	4	3	3	3	3	1	4	3	3	3	3	1	4.6	4.6	4.6	153.23	1409	1409;1209	4.59			7	10		0	12.607	By MS/MS	By MS/MS	By MS/MS	By MS/MS	By MS/MS	By MS/MS
A0A571BG95;E9PUE7;Q5SSL4-4;Q5SSL4;Q5SSL4-2;Q5SSL4-3;H3BJY3;H3BKV6	A0A571BG95;E9PUE7;Q5SSL4-4;Q5SSL4;Q5SSL4-2;Q5SSL4-3	4;3;3;3;3;2;1;1	4;3;3;3;3;2;1;1	3;2;2;2;2;1;0;1	Active breakpoint cluster region-related protein	Abr	tr|A0A571BG95|A0A571BG95_MOUSE Active breakpoint cluster region-related protein OS=Mus musculus OX=10090 GN=Abr PE=4 SV=1;tr|E9PUE7|E9PUE7_MOUSE Active breakpoint cluster region-related protein OS=Mus musculus OX=10090 GN=Abr PE=1 SV=1;sp|Q5SSL4-4|ABR_MOUS	8	4	4	3	4	4	4	4	3	4	4	4	4	4	3	4	3	3	3	3	2	3	3.7	3.7	2.9	133	1185	1185;813;822;859;871;641;146;161	4.64	2	6		6	11	0	14.521	By MS/MS	By MS/MS	By MS/MS	By MS/MS	By MS/MS	By MS/MS
A0JNY3;Q8BUV3	A0JNY3;Q8BUV3	8;8	8;8	8;8	Gephyrin;Molybdopterin adenylyltransferase;Molybdopterin molybdenumtransferase	Gphn	tr|A0JNY3|A0JNY3_MOUSE Molybdopterin molybdenumtransferase OS=Mus musculus OX=10090 GN=Gphn PE=1 SV=1;sp|Q8BUV3|GEPH_MOUSE Gephyrin OS=Mus musculus OX=10090 GN=Gphn PE=1 SV=2	2	8	8	8	5	2	5	4	3	3	5	2	5	4	3	3	5	2	5	4	3	3	15.7	15.7	15.7	83.665	772	772;769	4.32		11	2	5	7	0	12.505	By MS/MS	By MS/MS	By MS/MS	By MS/MS	By MS/MS	By MS/MS
A1A549;A1A550;Q9Z1J1;F6VNH1;D3YWT3;E9QQ90;F6XQR1;E9QQ91;F6WBK9;A0A0R4J1G0;D3Z1L0;F6WPX2;E9QQ89;E9Q990;Q8BGZ9;D3Z654;Q8C402;Q00417;P27782;Q924A0-3;Q924A0;Q924A0-8;Q00417-2;Q924A0-9;P27782-2;Q924A0-4;Q924A0-2	A1A549;A1A550;Q9Z1J1;F6VNH1;D3YWT3;E9QQ90;F6XQR1;E9QQ91;F6WBK9;A0A0R4J1G0;D3Z1L0;F6WPX2;E9QQ89;E9Q990;Q8BGZ9;D3Z654;Q8C402;Q00417;P27782;Q924A0-3;Q924A0;Q924A0-8;Q00417-2;Q924A0-9;P27782-2;Q924A0-4;Q924A0-2	2;2;2;1;1;1;1;1;1;1;1;1;1;1;1;1;1;1;1;1;1;1;1;1;1;1;1	2;2;2;1;1;1;1;1;1;1;1;1;1;1;1;1;1;1;1;1;1;1;1;1;1;1;1	2;2;2;1;1;1;1;1;1;1;1;1;1;1;1;1;1;1;1;1;1;1;1;1;1;1;1	Transcription factor 7-like 1;Transcription factor 7;Lymphoid enhancer-binding factor 1;Transcription factor 7-like 2	Tcf7l1;Tcf7l2;Lef1;Tcf7	tr|A1A549|A1A549_MOUSE Transcription factor 3 OS=Mus musculus OX=10090 GN=Tcf7l1 PE=1 SV=1;tr|A1A550|A1A550_MOUSE Transcription factor 3 OS=Mus musculus OX=10090 GN=Tcf7l1 PE=1 SV=1;sp|Q9Z1J1|TF7L1_MOUSE Transcription factor 7-like 1 OS=Mus musculus OX=100	27	2	2	2	2	2	2	2	2	0	2	2	2	2	2	0	2	2	2	2	2	0	4	4	4	64.086	599	599;585;584;154;442;598;477;459;459;447;265;442;606;435;384;369;331;419;397;455;459;468;303;299;284;605;447	4	5			7	4	0.00021295	5.0477	By MS/MS	By MS/MS	By MS/MS	By MS/MS	By MS/MS
A1BN54;Q7TPR4	A1BN54;Q7TPR4	48;48	26;26	24;24	Alpha-actinin-1	Actn1	tr|A1BN54|A1BN54_MOUSE Alpha actinin 1a OS=Mus musculus OX=10090 GN=Actn1 PE=1 SV=1;sp|Q7TPR4|ACTN1_MOUSE Alpha-actinin-1 OS=Mus musculus OX=10090 GN=Actn1 PE=1 SV=1	2	48	26	24	43	36	42	41	39	42	24	20	23	24	20	23	22	19	22	23	19	22	59.2	40.1	38.4	102.72	887	887;892	3.48	147	49	132	83	77	0	323.31	By MS/MS	By MS/MS	By MS/MS	By MS/MS	By MS/MS	By MS/MS
A1L3S7;Q8VHR5;Q8VHR5-2;A0A0U1RNM2	A1L3S7;Q8VHR5;Q8VHR5-2;A0A0U1RNM2	12;12;9;6	12;12;9;6	12;12;9;6	Transcriptional repressor p66-beta	Gatad2b	tr|A1L3S7|A1L3S7_MOUSE Gatad2b protein OS=Mus musculus OX=10090 GN=Gatad2b PE=1 SV=1;sp|Q8VHR5|P66B_MOUSE Transcriptional repressor p66-beta OS=Mus musculus OX=10090 GN=Gatad2b PE=1 SV=1;sp|Q8VHR5-2|P66B_MOUSE Isoform 2 of Transcriptional repressor p66-bet	4	12	12	12	12	9	10	12	9	10	12	9	10	12	9	10	12	9	10	12	9	10	27.5	27.5	27.5	63.638	578	578;594;485;263	3.36	30	19	23	22	10	0	108.5	By MS/MS	By MS/MS	By MS/MS	By MS/MS	By MS/MS	By MS/MS
A2A432;A2A432-2;E9PXY1;J3QJX0	A2A432;A2A432-2;E9PXY1	33;32;30;16	33;32;30;16	28;27;25;15	Cullin-4B	Cul4b	sp|A2A432|CUL4B_MOUSE Cullin-4B OS=Mus musculus OX=10090 GN=Cul4b PE=1 SV=1;sp|A2A432-2|CUL4B_MOUSE Isoform 2 of Cullin-4B OS=Mus musculus OX=10090 GN=Cul4b;tr|E9PXY1|E9PXY1_MOUSE Cullin-4B OS=Mus musculus OX=10090 GN=Cul4b PE=1 SV=2	4	33	33	28	28	24	30	29	28	29	28	24	30	29	28	29	24	21	26	26	24	25	36.6	36.6	32.8	110.7	970	970;941;896;552	3.49	116	18	102	54	65	0	323.31	By MS/MS	By MS/MS	By MS/MS	By MS/MS	By MS/MS	By MS/MS
Q05BA5;A2A468;O09000	Q05BA5;A2A468;O09000	10;10;10	10;10;10	10;10;10	Nuclear receptor coactivator 3	Ncoa3	tr|Q05BA5|Q05BA5_MOUSE Nuclear receptor coactivator OS=Mus musculus OX=10090 GN=Ncoa3 PE=1 SV=1;tr|A2A468|A2A468_MOUSE Nuclear receptor coactivator OS=Mus musculus OX=10090 GN=Ncoa3 PE=1 SV=1;sp|O09000|NCOA3_MOUSE Nuclear receptor coactivator 3 OS=Mus musc	3	10	10	10	9	9	9	6	9	7	9	9	9	6	9	7	9	9	9	6	9	7	10.8	10.8	10.8	151.95	1403	1403;1402;1398	4.06	1	18	16	14	5	0	60.277	By MS/MS	By MS/MS	By MS/MS	By MS/MS	By MS/MS	By MS/MS
A2A486	A2A486	4	1	1		Zmynd8	tr|A2A486|A2A486_MOUSE Zinc finger, MYND-type-containing 8 (Fragment) OS=Mus musculus OX=10090 GN=Zmynd8 PE=1 SV=8	1	4	1	1	3	4	4	4	4	3	0	1	1	1	1	1	0	1	1	1	1	1	27.7	5.8	5.8	21.766	191	191	4			5			0.0032328	2.4958	By matching	By MS/MS	By MS/MS	By MS/MS	By MS/MS	By matching
A2A4A6;Q62077;G3UXP4;G3V016;F6SLL0	A2A4A6;Q62077	10;10;3;1;1	10;10;3;1;1	10;10;3;1;1	Phosphoinositide phospholipase C;1-phosphatidylinositol 4,5-bisphosphate phosphodiesterase gamma-1	Plcg1	tr|A2A4A6|A2A4A6_MOUSE 1-phosphatidylinositol 4,5-bisphosphate phosphodiesterase gamma OS=Mus musculus OX=10090 GN=Plcg1 PE=1 SV=1;sp|Q62077|PLCG1_MOUSE 1-phosphatidylinositol 4,5-bisphosphate phosphodiesterase gamma-1 OS=Mus musculus OX=10090 GN=Plcg1 PE=	5	10	10	10	5	4	7	8	5	7	5	4	7	8	5	7	5	4	7	8	5	7	10.9	10.9	10.9	148.53	1290	1290;1302;513;110;132	4.53	3	1	13	12	9	0	23.242	By MS/MS	By MS/MS	By MS/MS	By MS/MS	By MS/MS	By MS/MS
A2A4B3;A2A4B1;Q99PI4	A2A4B3;A2A4B1;Q99PI4	2;2;2	2;2;2	2;2;2	Phosphatidate phosphatase LPIN3	Lpin3	tr|A2A4B3|A2A4B3_MOUSE Phosphatidate phosphatase LPIN3 OS=Mus musculus OX=10090 GN=Lpin3 PE=1 SV=1;tr|A2A4B1|A2A4B1_MOUSE Phosphatidate phosphatase LPIN3 OS=Mus musculus OX=10090 GN=Lpin3 PE=1 SV=1;sp|Q99PI4|LPIN3_MOUSE Phosphatidate phosphatase LPIN3 OS=M	3	2	2	2	2	0	0	1	1	1	2	0	0	1	1	1	2	0	0	1	1	1	5.5	5.5	5.5	90.424	817	817;858;848	5			1	3	1	0.008342	2.038	By MS/MS			By MS/MS	By matching	By matching
A8XY17;A2A4J8;Q9CQ80;A2A4K0;Q9CQ80-2	A8XY17;A2A4J8;Q9CQ80;A2A4K0;Q9CQ80-2	6;6;6;3;3	6;6;6;3;3	6;6;6;3;3	Vacuolar protein-sorting-associated protein 25	Vps25	tr|A8XY17|A8XY17_MOUSE Vacuolar protein-sorting-associated protein 25 OS=Mus musculus OX=10090 GN=Vps25 PE=1 SV=1;tr|A2A4J8|A2A4J8_MOUSE Vacuolar protein-sorting-associated protein 25 OS=Mus musculus OX=10090 GN=Vps25 PE=1 SV=1;sp|Q9CQ80|VPS25_MOUSE Vacuol	5	6	6	6	6	5	5	4	4	3	6	5	5	4	4	3	6	5	5	4	4	3	36.7	36.7	36.7	14.957	128	128;184;176;172;148	3.37	13	5	5	10	5	0	9.366	By MS/MS	By MS/MS	By MS/MS	By MS/MS	By MS/MS	By MS/MS
Q05BC8;A2A4N5;A2A4N7;K3W4P1;P97432;F6S397;A2A4N8	Q05BC8;A2A4N5;A2A4N7;K3W4P1;P97432;F6S397;A2A4N8	3;3;3;3;3;2;2	3;3;3;3;3;2;2	3;3;3;3;3;2;2	Next to BRCA1 gene 1 protein	Nbr1	tr|Q05BC8|Q05BC8_MOUSE Nbr1 protein OS=Mus musculus OX=10090 GN=Nbr1 PE=1 SV=1;tr|A2A4N5|A2A4N5_MOUSE Next to BRCA1 gene 1 protein OS=Mus musculus OX=10090 GN=Nbr1 PE=1 SV=1;tr|A2A4N7|A2A4N7_MOUSE Next to BRCA1 gene 1 protein OS=Mus musculus OX=10090 GN=Nb	7	3	3	3	3	2	2	3	3	1	3	2	2	3	3	1	3	2	2	3	3	1	3.9	3.9	3.9	98.815	888	888;906;963;988;988;712;951	4.07		4	5	5		0	6.6201	By MS/MS	By MS/MS	By MS/MS	By MS/MS	By MS/MS	By MS/MS
A2A4P0;A2A4N9	A2A4P0;A2A4N9	16;15	15;14	15;14	ATP-dependent RNA helicase DHX8	Dhx8	sp|A2A4P0|DHX8_MOUSE ATP-dependent RNA helicase DHX8 OS=Mus musculus OX=10090 GN=Dhx8 PE=2 SV=1;tr|A2A4N9|A2A4N9_MOUSE ATP-dependent RNA helicase DHX8 (Fragment) OS=Mus musculus OX=10090 GN=Dhx8 PE=1 SV=8	2	16	15	15	11	11	14	11	12	10	11	11	14	11	12	9	11	11	14	11	12	9	15.4	14.6	14.6	142.57	1244	1244;1174	3.55	13	26	28	17	4	0	147.41	By MS/MS	By MS/MS	By MS/MS	By MS/MS	By MS/MS	By MS/MS
A2A4Y7;F7B2G8;Q99LB0	A2A4Y7;F7B2G8;Q99LB0	1;1;1	1;1;1	1;1;1	Deoxynucleotidyltransferase terminal-interacting protein 1	Dnttip1	tr|A2A4Y7|A2A4Y7_MOUSE Deoxynucleotidyltransferase terminal-interacting protein 1 OS=Mus musculus OX=10090 GN=Dnttip1 PE=1 SV=1;tr|F7B2G8|F7B2G8_MOUSE Deoxynucleotidyltransferase terminal-interacting protein 1 (Fragment) OS=Mus musculus OX=10090 GN=Dnttip1	3	1	1	1	1	1	1	0	0	1	1	1	1	0	0	1	1	1	1	0	0	1	15.3	15.3	15.3	12.183	111	111;211;328	5				4		0	6.3362	By MS/MS	By MS/MS	By MS/MS			By MS/MS
A2A5R2;F6YCJ0	A2A5R2	8;2	6;1	6;1	Brefeldin A-inhibited guanine nucleotide-exchange protein 2	Arfgef2	sp|A2A5R2|BIG2_MOUSE Brefeldin A-inhibited guanine nucleotide-exchange protein 2 OS=Mus musculus OX=10090 GN=Arfgef2 PE=1 SV=1	2	8	6	6	7	6	4	7	4	5	5	6	4	6	4	5	5	6	4	6	4	5	6	4.4	4.4	202.24	1792	1792;283	4.97	1	6	4	6	19	0	42.053	By MS/MS	By MS/MS	By MS/MS	By MS/MS	By MS/MS	By MS/MS
A2A5R6;Q8R151	A2A5R6;Q8R151	1;1	1;1	1;1	NFX1-type zinc finger-containing protein 1	Znfx1	tr|A2A5R6|A2A5R6_MOUSE NFX1-type zinc finger-containing protein 1 OS=Mus musculus OX=10090 GN=Znfx1 PE=1 SV=1;sp|Q8R151|ZNFX1_MOUSE NFX1-type zinc finger-containing protein 1 OS=Mus musculus OX=10090 GN=Znfx1 PE=1 SV=3	2	1	1	1	0	1	1	1	1	0	0	1	1	1	1	0	0	1	1	1	1	0	1.7	1.7	1.7	119.49	1045	1045;1909	6					4	0.00058411	3.5309		By MS/MS	By MS/MS	By MS/MS	By MS/MS
A2A5R8;Q9DBE7;A2A5S3;Q9Z108;V9GX87	A2A5R8;Q9DBE7;A2A5S3;Q9Z108;V9GX87	10;10;10;9;5	10;10;10;9;5	9;9;9;8;4	Double-stranded RNA-binding protein Staufen homolog 1	Stau1	tr|A2A5R8|A2A5R8_MOUSE Double-stranded RNA-binding protein Staufen homolog 1 OS=Mus musculus OX=10090 GN=Stau1 PE=1 SV=1;tr|Q9DBE7|Q9DBE7_MOUSE Double-stranded RNA-binding protein Staufen homolog 1 OS=Mus musculus OX=10090 GN=Stau1 PE=1 SV=1;tr|A2A5S3|A2A5	5	10	10	9	8	7	7	8	7	7	8	7	7	8	7	7	7	6	6	7	6	6	28	28	26.6	53.746	485	485;489;495;487;436	3.68	15		36	11	6	0	70.079	By MS/MS	By MS/MS	By MS/MS	By MS/MS	By MS/MS	By MS/MS
E9Q6A7;A2A655;A2A654;A2A653;A2A652;A0A140LHY5	E9Q6A7;A2A655;A2A654	19;19;19;4;1;1	19;19;19;4;1;1	19;19;19;4;1;1		Bptf	tr|E9Q6A7|E9Q6A7_MOUSE Bromodomain PHD finger transcription factor OS=Mus musculus OX=10090 GN=Bptf PE=1 SV=1;tr|A2A655|A2A655_MOUSE Bromodomain PHD finger transcription factor OS=Mus musculus OX=10090 GN=Bptf PE=1 SV=1;tr|A2A654|A2A654_MOUSE Bromodomain P	6	19	19	19	16	12	15	14	13	8	16	12	15	14	13	8	16	12	15	14	13	8	8.5	8.5	8.5	321.59	2921	2921;2973;3036;289;158;329	3.85	19	16	30	16	21	0	64.589	By MS/MS	By MS/MS	By MS/MS	By MS/MS	By MS/MS	By MS/MS
A2A6A1	A2A6A1	5	5	5	G patch domain-containing protein 8	Gpatch8	sp|A2A6A1|GPTC8_MOUSE G patch domain-containing protein 8 OS=Mus musculus OX=10090 GN=Gpatch8 PE=1 SV=1	1	5	5	5	5	3	4	4	3	3	5	3	4	4	3	3	5	3	4	4	3	3	6	6	6	164.99	1505	1505	3.57	9	4	5	6	6	0	36.542	By MS/MS	By MS/MS	By MS/MS	By MS/MS	By MS/MS	By MS/MS
A2A6Q5;A2A6Q5-2;A2A6Q5-3;Q8R568	A2A6Q5;A2A6Q5-2;A2A6Q5-3	8;8;8;1	8;8;8;1	8;8;8;1	Cell division cycle protein 27 homolog	Cdc27	sp|A2A6Q5|CDC27_MOUSE Cell division cycle protein 27 homolog OS=Mus musculus OX=10090 GN=Cdc27 PE=1 SV=1;sp|A2A6Q5-2|CDC27_MOUSE Isoform 2 of Cell division cycle protein 27 homolog OS=Mus musculus OX=10090 GN=Cdc27;sp|A2A6Q5-3|CDC27_MOUSE Isoform 3 of Cell	4	8	8	8	7	6	7	7	7	8	7	6	7	7	7	8	7	6	7	7	7	8	11.5	11.5	11.5	91.841	825	825;830;831;399	3.54	19	11	13	23	6	0	91.758	By MS/MS	By MS/MS	By MS/MS	By MS/MS	By MS/MS	By MS/MS
A2A6U3;Q80UG5-3;Q80UG5;A2A6U5	A2A6U3;Q80UG5-3;Q80UG5;A2A6U5	17;17;17;10	17;17;17;10	3;3;3;0	Septin-9	2020-09-09	tr|A2A6U3|A2A6U3_MOUSE Septin 9 OS=Mus musculus OX=10090 GN=Sept9 PE=1 SV=1;sp|Q80UG5-3|SEPT9_MOUSE Isoform 3 of Septin-9 OS=Mus musculus OX=10090 GN=Septin9;sp|Q80UG5|SEPT9_MOUSE Septin-9 OS=Mus musculus OX=10090 GN=Septin9 PE=1 SV=1;tr|A2A6U5|A2A6U5_MOUS	4	17	17	3	14	13	15	14	12	16	14	13	15	14	12	16	2	1	3	3	2	2	33.5	33.5	5.8	63.772	565	565;576;583;242	3.53	59	12	34	34	36	0	101.77	By MS/MS	By MS/MS	By MS/MS	By MS/MS	By MS/MS	By MS/MS
A2A715;Q3TBW2	A2A715;Q3TBW2	2;2	2;2	2;2	39S ribosomal protein L10, mitochondrial	Mrpl10	tr|A2A715|A2A715_MOUSE 39S ribosomal protein L10, mitochondrial OS=Mus musculus OX=10090 GN=Mrpl10 PE=1 SV=1;sp|Q3TBW2|RM10_MOUSE 39S ribosomal protein L10, mitochondrial OS=Mus musculus OX=10090 GN=Mrpl10 PE=1 SV=2	2	2	2	2	2	1	2	1	0	1	2	1	2	1	0	1	2	1	2	1	0	1	13.6	13.6	13.6	20.83	184	184;262	2.29	4		3			0.00058708	3.5904	By MS/MS	By matching	By MS/MS	By MS/MS		By matching
A2A791;A2A791-2;F6VYE2	A2A791;A2A791-2;F6VYE2	25;22;19	25;22;19	25;22;19	Zinc finger MYM-type protein 4	Zmym4	sp|A2A791|ZMYM4_MOUSE Zinc finger MYM-type protein 4 OS=Mus musculus OX=10090 GN=Zmym4 PE=1 SV=1;sp|A2A791-2|ZMYM4_MOUSE Isoform 2 of Zinc finger MYM-type protein 4 OS=Mus musculus OX=10090 GN=Zmym4;tr|F6VYE2|F6VYE2_MOUSE Zinc finger MYM-type protein 4 (Fr	3	25	25	25	16	14	18	18	10	14	16	14	18	18	10	14	16	14	18	18	10	14	20.1	20.1	20.1	172.44	1549	1549;1460;1209	4.02	14	33	17	21	28	0	138.76	By MS/MS	By MS/MS	By MS/MS	By MS/MS	By MS/MS	By MS/MS
A2A7B5;Q8C2W5;A2A7B7	A2A7B5	4;1;1	4;1;1	4;1;1		Prdm2	tr|A2A7B5|A2A7B5_MOUSE PR domain-containing 2, with ZNF domain OS=Mus musculus OX=10090 GN=Prdm2 PE=1 SV=1	3	4	4	4	2	2	3	3	3	1	2	2	3	3	3	1	2	2	3	3	3	1	2.8	2.8	2.8	187.2	1709	1709;152;169	5.21		1	4		9	0	7.9895	By MS/MS	By MS/MS	By MS/MS	By MS/MS	By MS/MS	By matching
E9Q532;A2A7F4	E9Q532;A2A7F4	8;8	8;8	8;8		Rlf	tr|E9Q532|E9Q532_MOUSE Rearranged L-myc fusion sequence OS=Mus musculus OX=10090 GN=Rlf PE=1 SV=1;tr|A2A7F4|A2A7F4_MOUSE MCG122876 OS=Mus musculus OX=10090 GN=Rlf PE=1 SV=1	2	8	8	8	6	3	5	5	4	4	6	3	5	5	4	4	6	3	5	5	4	4	5.7	5.7	5.7	206.28	1808	1808;1918	3.97		13	11		6	0	13.832	By MS/MS	By MS/MS	By MS/MS	By MS/MS	By MS/MS	By matching
A2A7G9;A2A7H1;Z4YN00;Q9QZN4	A2A7G9;A2A7H1;Z4YN00;Q9QZN4	1;1;1;1	1;1;1;1	1;1;1;1	F-box only protein 6	Fbxo6	tr|A2A7G9|A2A7G9_MOUSE F-box only protein 6 (Fragment) OS=Mus musculus OX=10090 GN=Fbxo6 PE=1 SV=1;tr|A2A7H1|A2A7H1_MOUSE F-box only protein 6 (Fragment) OS=Mus musculus OX=10090 GN=Fbxo6 PE=1 SV=1;tr|Z4YN00|Z4YN00_MOUSE F-box only protein 6 (Fragment) OS=	4	1	1	1	0	0	0	1	1	0	0	0	0	1	1	0	0	0	0	1	1	0	7	7	7	26.59	228	228;237;265;295	3		2				0.006175	2.2439				By MS/MS	By MS/MS
A2A7P4;Q3TDE8	A2A7P4;Q3TDE8	1;1	1;1	1;1	Zinc finger protein 691	Zfp691;Znf691	tr|A2A7P4|A2A7P4_MOUSE Zinc finger protein 691 OS=Mus musculus OX=10090 GN=Zfp691 PE=1 SV=1;sp|Q3TDE8|ZN691_MOUSE Zinc finger protein 691 OS=Mus musculus OX=10090 GN=Znf691 PE=2 SV=1	2	1	1	1	1	1	1	1	0	0	1	1	1	1	0	0	1	1	1	1	0	0	3.2	3.2	3.2	32.297	283	283;283	6					4	0.008329	2.0273	By MS/MS	By MS/MS	By MS/MS	By MS/MS
A6PW84;A2A7Q5;Q3V1T4-3;Q3V1T4;Q3V1T4-2	A6PW84;A2A7Q5;Q3V1T4-3;Q3V1T4;Q3V1T4-2	6;6;6;6;3	6;6;6;6;3	6;6;6;6;3	Prolyl 3-hydroxylase 1	P3h1;Lepre1	tr|A6PW84|A6PW84_MOUSE Prolyl 3-hydroxylase 1 OS=Mus musculus OX=10090 GN=P3h1 PE=1 SV=1;tr|A2A7Q5|A2A7Q5_MOUSE Prolyl 3-hydroxylase 1 OS=Mus musculus OX=10090 GN=P3h1 PE=1 SV=1;sp|Q3V1T4-3|P3H1_MOUSE Isoform 3 of Prolyl 3-hydroxylase 1 OS=Mus musculus OX=	5	6	6	6	6	3	4	4	4	4	6	3	4	4	4	4	6	3	4	4	4	4	9.2	9.2	9.2	84.472	746	746;748;560;739;543	3.69	7	11	3		11	0	12.339	By MS/MS	By MS/MS	By MS/MS	By MS/MS	By MS/MS	By MS/MS
A2A7S7;Q91WQ3;F6VXZ2	A2A7S7;Q91WQ3	36;35;4	36;35;4	36;35;4	Tyrosine--tRNA ligase;Tyrosine--tRNA ligase, cytoplasmic;Tyrosine--tRNA ligase, cytoplasmic, N-terminally processed	Yars	tr|A2A7S7|A2A7S7_MOUSE Tyrosine--tRNA ligase OS=Mus musculus OX=10090 GN=Yars PE=1 SV=1;sp|Q91WQ3|SYYC_MOUSE Tyrosine--tRNA ligase, cytoplasmic OS=Mus musculus OX=10090 GN=Yars PE=1 SV=3	3	36	36	36	34	29	31	30	27	25	34	29	31	30	27	25	34	29	31	30	27	25	64.7	64.7	64.7	63.001	564	564;528;129	3.33	133	23	74	72	55	0	323.31	By MS/MS	By MS/MS	By MS/MS	By MS/MS	By MS/MS	By MS/MS
A2A7S8-4;A2A7S8-3;A2A7S8;A2A7S8-2	A2A7S8-4;A2A7S8-3;A2A7S8;A2A7S8-2	5;4;4;4	5;4;4;4	5;4;4;4	Uncharacterized protein KIAA1522	Kiaa1522	sp|A2A7S8-4|K1522_MOUSE Isoform 4 of Uncharacterized protein KIAA1522 OS=Mus musculus OX=10090 GN=Kiaa1522;sp|A2A7S8-3|K1522_MOUSE Isoform 3 of Uncharacterized protein KIAA1522 OS=Mus musculus OX=10090 GN=Kiaa1522;sp|A2A7S8|K1522_MOUSE Uncharacterized prot	4	5	5	5	3	2	1	3	1	2	3	2	1	3	1	2	3	2	1	3	1	2	9.7	9.7	9.7	106.21	1025	1025;900;1013;1070	3.67	5	1			6	0	7.8058	By MS/MS	By MS/MS	By matching	By MS/MS	By matching	By MS/MS
A2A841;P48193-2;P48193;A2A842;A2A839;A2A838;A0A571BEG4;A2AD32;F7BUB8;F7CR30;A0A1D5RLV1	A2A841;P48193-2;P48193;A2A842;A2A839;A2A838;A0A571BEG4;A2AD32	13;13;13;12;11;11;10;9;5;3;3	12;12;12;11;10;10;9;9;4;2;3	8;8;8;7;6;6;5;8;0;0;2	Protein 4.1	Epb4.1;Epb41	tr|A2A841|A2A841_MOUSE Protein 4.1 OS=Mus musculus OX=10090 GN=Epb41 PE=1 SV=1;sp|P48193-2|41_MOUSE Isoform 2 of Protein 4.1 OS=Mus musculus OX=10090 GN=Epb41;sp|P48193|41_MOUSE Protein 4.1 OS=Mus musculus OX=10090 GN=Epb41 PE=1 SV=2;tr|A2A842|A2A842_MOUSE	11	13	12	8	11	9	10	11	6	6	10	9	10	11	6	6	6	6	7	8	3	3	22.2	21.1	13.6	97.239	869	869;804;858;769;639;667;594;715;250;197;476	3.66	8	22	17	3	11	0	43.805	By MS/MS	By MS/MS	By MS/MS	By MS/MS	By MS/MS	By MS/MS
A2A848;Q9R0H0-2;Q9R0H0	A2A848;Q9R0H0-2;Q9R0H0	1;1;1	1;1;1	1;1;1	Peroxisomal acyl-coenzyme A oxidase 1	Acox1	tr|A2A848|A2A848_MOUSE Peroxisomal acyl-coenzyme A oxidase 1 (Fragment) OS=Mus musculus OX=10090 GN=Acox1 PE=1 SV=1;sp|Q9R0H0-2|ACOX1_MOUSE Isoform 2 of Peroxisomal acyl-coenzyme A oxidase 1 OS=Mus musculus OX=10090 GN=Acox1;sp|Q9R0H0|ACOX1_MOUSE Peroxisom	3	1	1	1	1	1	1	1	0	1	1	1	1	1	0	1	1	1	1	1	0	1	2.4	2.4	2.4	70.03	625	625;661;661	4			5			0.000595	3.8194	By MS/MS	By MS/MS	By MS/MS	By MS/MS		By matching
A2A880;Q91WL6	A2A880;Q91WL6	1;1	1;1	1;1	Sorting nexin-11	Snx11	tr|A2A880|A2A880_MOUSE Sorting nexin-11 (Fragment) OS=Mus musculus OX=10090 GN=Snx11 PE=1 SV=1;sp|Q91WL6|SNX11_MOUSE Sorting nexin-11 OS=Mus musculus OX=10090 GN=Snx11 PE=1 SV=1	2	1	1	1	1	1	0	1	0	1	1	1	0	1	0	1	1	1	0	1	0	1	6.6	6.6	6.6	22.392	197	197;271	4			4			0.0053201	2.3095	By MS/MS	By MS/MS		By MS/MS		By MS/MS
A2A8L5;F6S1X8;F6Y3V0;A0A1Y7VNR5;Q64487-9;G3UY75;Q5SPA9;B9EJA3;E9PVW8;G3UWK6;E9Q7I7;G3UYU6;Q64487-5;G3UX60;Q64487-6;Q64487-8;Q64487-7;Q64487-10;Q64487-3;Q64487-11;Q64487-1;Q64487-12;Q64487-2;Q64487	A2A8L5;F6S1X8;F6Y3V0	10;7;6;2;1;1;1;1;1;1;1;1;1;1;1;1;1;1;1;1;1;1;1;1	10;7;6;2;1;1;1;1;1;1;1;1;1;1;1;1;1;1;1;1;1;1;1;1	10;7;6;2;1;1;1;1;1;1;1;1;1;1;1;1;1;1;1;1;1;1;1;1	Receptor-type tyrosine-protein phosphatase F	Ptprf	sp|A2A8L5|PTPRF_MOUSE Receptor-type tyrosine-protein phosphatase F OS=Mus musculus OX=10090 GN=Ptprf PE=1 SV=1;tr|F6S1X8|F6S1X8_MOUSE Receptor-type tyrosine-protein phosphatase F (Fragment) OS=Mus musculus OX=10090 GN=Ptprf PE=1 SV=1;tr|F6Y3V0|F6Y3V0_MOUSE	24	10	10	10	5	5	6	8	4	5	5	5	6	8	4	5	5	5	6	8	4	5	9.6	9.6	9.6	211.49	1898	1898;1332;1291;363;1902;1890;1254;1508;1506;1505;1505;1495;1908;1502;1909;1906;1905;1903;1695;1899;1893;1501;1293;1912	4.94		2	6	18	8	0	18.86	By MS/MS	By MS/MS	By MS/MS	By MS/MS	By MS/MS	By MS/MS
A2A8L9;Q8BW72-2;Q8BW72;B0V2M9;Q91VY5-2;Q91VY5	A2A8L9;Q8BW72-2;Q8BW72	4;4;4;1;1;1	3;3;3;1;1;1	3;3;3;1;1;1	Lysine-specific demethylase 4A	Kdm4a	tr|A2A8L9|A2A8L9_MOUSE Lysine-specific demethylase 4A OS=Mus musculus OX=10090 GN=Kdm4a PE=1 SV=1;sp|Q8BW72-2|KDM4A_MOUSE Isoform 2 of Lysine-specific demethylase 4A OS=Mus musculus OX=10090 GN=Kdm4a;sp|Q8BW72|KDM4A_MOUSE Lysine-specific demethylase 4A OS=	6	4	3	3	2	4	2	2	3	3	1	3	2	2	2	3	1	3	2	2	2	3	3.3	2.6	2.6	115.97	1033	1033;1033;1064;1021;1021;1086	5.57				6	8	0	5.3246	By MS/MS	By MS/MS	By MS/MS	By MS/MS	By MS/MS	By MS/MS
B2RX14;A2A8R7;A0A0A0MQJ6	B2RX14;A2A8R7;A0A0A0MQJ6	10;10;5	10;10;5	8;8;5	Terminal uridylyltransferase 4	Zcchc11	sp|B2RX14|TUT4_MOUSE Terminal uridylyltransferase 4 OS=Mus musculus OX=10090 GN=Tut4 PE=1 SV=2;tr|A2A8R7|A2A8R7_MOUSE Terminal uridylyltransferase 4 OS=Mus musculus OX=10090 GN=Tut4 PE=1 SV=1;tr|A0A0A0MQJ6|A0A0A0MQJ6_MOUSE Terminal uridylyltransferase 4 (F	3	10	10	8	6	3	5	8	5	3	6	3	5	8	5	3	4	3	4	7	4	3	6.9	6.9	5.8	184.65	1644	1644;1648;1006	4.26	3		16	12	3	0	16.959	By MS/MS	By MS/MS	By MS/MS	By MS/MS	By MS/MS	By MS/MS
E9QKA4;A2A8V8;A2A8V9;E9PUK6;Q52KI8;Q52KI8-2;A2A983;F6T4M4;F7BWM1;F6UK16	E9QKA4;A2A8V8;A2A8V9;E9PUK6;Q52KI8;Q52KI8-2	11;11;11;11;11;10;5;3;3;2	11;11;11;11;11;10;5;3;3;2	11;11;11;11;11;10;5;3;3;2	Serine/arginine repetitive matrix protein 1	Srrm1	tr|E9QKA4|E9QKA4_MOUSE Serine/arginine repetitive matrix protein 1 OS=Mus musculus OX=10090 GN=Srrm1 PE=1 SV=1;tr|A2A8V8|A2A8V8_MOUSE Serine/arginine repetitive matrix protein 1 OS=Mus musculus OX=10090 GN=Srrm1 PE=1 SV=1;tr|A2A8V9|A2A8V9_MOUSE Serine/argi	10	11	11	11	9	7	10	10	7	8	9	7	10	10	7	8	9	7	10	10	7	8	14	14	14	101.16	897	897;909;918;923;946;897;198;140;239;318	3.6	29	12	20	5	28	0	261.94	By MS/MS	By MS/MS	By MS/MS	By MS/MS	By MS/MS	By MS/MS
A2A934;A2A930;A2A931;A2A933;A2A935-2;A2A935;A2A935-3	A2A934;A2A930;A2A931;A2A933;A2A935-2;A2A935;A2A935-3	1;1;1;1;1;1;1	1;1;1;1;1;1;1	1;1;1;1;1;1;1	PR domain zinc finger protein 16	Prdm16	tr|A2A934|A2A934_MOUSE Histone-lysine N-methyltransferase PRDM16 OS=Mus musculus OX=10090 GN=Prdm16 PE=1 SV=1;tr|A2A930|A2A930_MOUSE Histone-lysine N-methyltransferase PRDM16 OS=Mus musculus OX=10090 GN=Prdm16 PE=1 SV=1;tr|A2A931|A2A931_MOUSE Histone-lysin	7	1	1	1	1	0	1	0	1	0	1	0	1	0	1	0	1	0	1	0	1	0	0.8	0.8	0.8	130.34	1177	1177;1257;1274;1276;1178;1275;1276	3.33		2	1			0.0054799	2.2727	By MS/MS		By MS/MS		By MS/MS
A2A9F7;Q8VEJ1	A2A9F7;Q8VEJ1	2;2	2;2	2;2	GPN-loop GTPase 2	Gpn2	tr|A2A9F7|A2A9F7_MOUSE GPN-loop GTPase 2 OS=Mus musculus OX=10090 GN=Gpn2 PE=1 SV=1;sp|Q8VEJ1|GPN2_MOUSE GPN-loop GTPase 2 OS=Mus musculus OX=10090 GN=Gpn2 PE=2 SV=2	2	2	2	2	1	1	1	0	0	2	1	1	1	0	0	2	1	1	1	0	0	2	11.5	11.5	11.5	31.814	287	287;310	3.6		4			1	0.00021354	5.0917	By MS/MS	By MS/MS	By MS/MS			By MS/MS
A2A9I0;O35166	A2A9I0;O35166	2;2	2;2	2;2	Golgi SNAP receptor complex member 2	Gosr2	tr|A2A9I0|A2A9I0_MOUSE Golgi SNAP receptor complex member 2 OS=Mus musculus OX=10090 GN=Gosr2 PE=1 SV=1;sp|O35166|GOSR2_MOUSE Golgi SNAP receptor complex member 2 OS=Mus musculus OX=10090 GN=Gosr2 PE=1 SV=2	2	2	2	2	1	2	1	1	0	2	1	2	1	1	0	2	1	2	1	1	0	2	12.7	12.7	12.7	19.571	165	165;212	4.29		4			3	0.002042	2.8784	By matching	By MS/MS	By MS/MS	By MS/MS		By MS/MS
A2A9K3;Q8BMK0	A2A9K3;Q8BMK0	3;3	3;3	3;3	Centrosomal protein of 85 kDa	Cep85	tr|A2A9K3|A2A9K3_MOUSE Centrosomal protein of 85 kDa OS=Mus musculus OX=10090 GN=Cep85 PE=1 SV=1;sp|Q8BMK0|CEP85_MOUSE Centrosomal protein of 85 kDa OS=Mus musculus OX=10090 GN=Cep85 PE=1 SV=2	2	3	3	3	1	0	3	0	0	1	1	0	3	0	0	1	1	0	3	0	0	1	5.7	5.7	5.7	85.097	759	759;761	4.2		2		3		0	7.6313	By MS/MS		By MS/MS			By matching
A6PWC3;A2A9Q2;Q8BHG1;Q3V3G9	A6PWC3;A2A9Q2;Q8BHG1	19;19;19;4	19;19;19;4	19;19;19;4	Nardilysin	Nrd1	tr|A6PWC3|A6PWC3_MOUSE Nardilysin, N-arginine dibasic convertase, NRD convertase 1 OS=Mus musculus OX=10090 GN=Nrd1 PE=1 SV=1;tr|A2A9Q2|A2A9Q2_MOUSE Nardilysin, N-arginine dibasic convertase, NRD convertase 1 OS=Mus musculus OX=10090 GN=Nrd1 PE=1 SV=1;sp|Q	4	19	19	19	18	15	16	16	15	16	18	15	16	16	15	16	18	15	16	16	15	16	20.2	20.2	20.2	127.77	1117	1117;1229;1161;395	3.86	55	4	37	33	55	0	323.31	By MS/MS	By MS/MS	By MS/MS	By MS/MS	By MS/MS	By MS/MS
A2A9W1;A2A9W3;Q3UBZ5-2;Q3UBZ5	A2A9W1;A2A9W3;Q3UBZ5-2;Q3UBZ5	2;2;2;2	2;2;2;2	2;2;2;2	MIF4G domain-containing protein	Mif4gd	tr|A2A9W1|A2A9W1_MOUSE MIF4G domain-containing protein (Fragment) OS=Mus musculus OX=10090 GN=Mif4gd PE=1 SV=1;tr|A2A9W3|A2A9W3_MOUSE MIF4G domain-containing protein OS=Mus musculus OX=10090 GN=Mif4gd PE=1 SV=1;sp|Q3UBZ5-2|MI4GD_MOUSE Isoform 2 of MIF4G do	4	2	2	2	2	0	2	1	1	1	2	0	2	1	1	1	2	0	2	1	1	1	14.8	14.8	14.8	18.658	162	162;203;92;222	4.29			5	2		0.00060229	4.0247	By MS/MS		By MS/MS	By MS/MS	By MS/MS	By MS/MS
A2A9W7;Q8BMI3;S4R2D2;A2A9W5	A2A9W7;Q8BMI3;S4R2D2	6;6;5;2	6;6;5;2	6;6;5;2	ADP-ribosylation factor-binding protein GGA3	Gga3	tr|A2A9W7|A2A9W7_MOUSE ADP-ribosylation factor-binding protein GGA3 OS=Mus musculus OX=10090 GN=Gga3 PE=1 SV=1;sp|Q8BMI3|GGA3_MOUSE ADP-ribosylation factor-binding protein GGA3 OS=Mus musculus OX=10090 GN=Gga3 PE=1 SV=2;tr|S4R2D2|S4R2D2_MOUSE ADP-ribosylat	4	6	6	6	5	4	4	6	5	4	5	4	4	6	5	4	5	4	4	6	5	4	13.1	13.1	13.1	70.192	640	640;718;595;117	3.29	8	15	6	6	3	0	12.86	By MS/MS	By MS/MS	By MS/MS	By MS/MS	By MS/MS	By MS/MS
A2AAN0;O35250-2;O35250;A2AAN3	A2AAN0;O35250-2;O35250	8;8;8;2	8;8;8;2	8;8;8;2	Exocyst complex component 7	Exoc7	tr|A2AAN0|A2AAN0_MOUSE Exocyst complex component 7 OS=Mus musculus OX=10090 GN=Exoc7 PE=1 SV=1;sp|O35250-2|EXOC7_MOUSE Isoform 2 of Exocyst complex component 7 OS=Mus musculus OX=10090 GN=Exoc7;sp|O35250|EXOC7_MOUSE Exocyst complex component 7 OS=Mus muscu	4	8	8	8	6	7	5	7	7	7	6	7	5	7	7	7	6	7	5	7	7	7	13.5	13.5	13.5	78.505	684	684;653;697;288	3.91	6	8	17	10	6	0	33.556	By MS/MS	By MS/MS	By MS/MS	By MS/MS	By MS/MS	By MS/MS
A2AAN2;Q8BMA6	A2AAN2;Q8BMA6	14;14	14;14	14;14	Signal recognition particle subunit SRP68	Srp68	tr|A2AAN2|A2AAN2_MOUSE Signal recognition particle subunit SRP68 OS=Mus musculus OX=10090 GN=Srp68 PE=1 SV=1;sp|Q8BMA6|SRP68_MOUSE Signal recognition particle subunit SRP68 OS=Mus musculus OX=10090 GN=Srp68 PE=1 SV=2	2	14	14	14	11	10	11	9	11	10	11	10	11	9	11	10	11	10	11	9	11	10	32.5	32.5	32.5	65.952	587	587;625	3.72	32	10	21	21	27	0	160.13	By MS/MS	By MS/MS	By MS/MS	By MS/MS	By MS/MS	By MS/MS
[truncated: 5,047 more rows]
[truncated: 38 more columns]
