# Supplementary material for: Hijacking of transcriptional condensates by endogenous retroviruses
Source: Research Square preprint supplement (doi:10.21203/rs.3.rs-802409/v1), 2021-09-15
Supplement: Supplementary file 10 [file 978bc38b508e10cb1c4b1ef4.xlsx]

## Sheet: tt_slam_seq_fold_changes
gene
