# Supplementary material for: Hijacking of transcriptional condensates by endogenous retroviruses
Source: Research Square preprint supplement (doi:10.21203/rs.3.rs-802409/v1), 2021-09-15
Supplement: Supplementary file 11 [file d5880c7459300075c0aba530.xlsx]

## Sheet: 20201028_TableS5
chr	start	end	log2FC_2h	log2FC_6h	log2FC_24h	adj_pvalue	enhancer_type
chr1	13103296	13105296	0.243542	0.0547189	-1.32839	0.097096	SE
chr1	119304375	119306375	0.195972	0.825131	-0.125538	0.737126	SE
chr1	136952441	136954441	0.857143	0.110998	0.586478	0.833526	SE
chr1	13073421	13075421	-0.00878114	0.383303	-0.95179	0.448124	SE
chr1	13079957	13081957	-0.500711	0.473742	-0.705602	0.818891	SE
chr1	13084019	13086019	0.385874	-0.00303184	-2.20785	0.313667	SE
chr1	34073163	34075163	0.344354	0.0573464	0.514292	0.520829	SE
chr1	34076398	34078398	0.226423	-0.0719872	0.440192	0.712721	SE
chr1	36016348	36018348	-0.31304	0.523363	1.78986	5.17405e-05	SE
chr1	84859998	84861998	-0.136835	0.0751077	-0.640926	0.608224	SE
chr1	84866045	84868045	-0.122125	-0.360248	-0.136613	0.862424	SE
chr1	84871306	84873306	-0.668126	-0.554288	-1.3363	0.572171	SE
chr1	84881377	84883377	0.863096	0.627248	1.15759	0.847763	SE
chr1	84889100	84891100	0.339298	0.253672	-0.612324	0.679649	SE
chr1	89869808	89871808	-0.303529	0.0584988	-3.16765	0.33837	SE
chr1	89875620	89877620	0.0479317	-0.145595	-2.38611	0.333287	SE
chr1	136689330	136691330	-0.620784	-0.0310194	-0.853897	0.611943	SE
chr1	153091764	153093764	0.0192153	-0.324934	0.225318	0.764801	SE
chr1	153092341	153094341	0.0888482	-0.287792	-0.0611016	0.887475	SE
chr1	153094763	153096763	0.410258	-0.243079	-0.761591	0.186418	SE
chr1	13093865	13095865	0.764298	0.624279	-0.342084	0.0075853	SE
chr1	36053713	36055713	0.124899	0.102391	0.61471	0.925043	SE
chr1	36059931	36061931	-0.459535	-0.623077	0.096526	0.171799	SE
chr1	36981660	36983660	0.243525	-0.0706995	-1.56205	0.0725673	SE
chr1	36983207	36985207	0.00711262	-0.363954	-1.77987	0.000168366	SE
chr1	36985037	36987037	-0.200554	-0.477605	-1.67452	8.41352e-08	SE
chr1	36986055	36988055	0.105031	-0.0279453	-1.40316	3.5293e-05	SE
chr1	36987030	36989030	-0.150124	0.211183	-0.827024	0.0969367	SE
chr1	72792355	72794355	-0.677515	-0.212714	0.564344	0.646719	SE
chr1	72805237	72807237	-0.730926	-0.98631	0.598264	3.50458e-10	SE
chr1	119075275	119077275	0.511594	0.253208	-0.542461	0.261414	SE
chr1	119397981	119399981	0.963883	0.879886	-1.21435	0.474625	SE
chr1	135185199	135187199	0.448792	0.117918	0.602405	0.906152	SE
chr1	135197992	135199992	-0.0669222	-0.543722	-0.111283	0.905923	SE
chr1	180887988	180889988	-0.0534248	-0.0707956	0.808512	0.000442677	SE
chr1	180923933	180925933	-0.415381	-0.220224	0.52463	0.000629139	SE
chr1	182029436	182031436	0.111538	-0.145606	-1.16887	0.00335355	SE
chr1	182030396	182032396	0.154888	-0.0594473	-1.30656	0.0129898	SE
chr10	21826121	21828121	-0.0458331	-0.0129452	-1.08816	0.0402994	SE
chr10	21828292	21830292	0.249854	-0.067553	-1.29504	0.00282543	SE
chr10	62883291	62885291	1.15982	1.9999	1.3323	0.560135	SE
chr10	62897360	62899360	0.665451	-0.167155	-0.436583	0.247223	SE
chr10	67082985	67084985	-0.250651	-0.383984	-0.891096	0.619856	SE
chr10	21980099	21982099	1.07351	0.432344	0.263895	0.705707	SE
chr10	21987647	21989647	0.235647	-0.637368	-0.324845	0.922668	SE
chr10	67099390	67101390	0.629904	0.0628021	0.959637	0.133401	SE
chr10	67100181	67102181	0.615258	0.115723	1.01159	0.476693	SE
chr10	75881218	75883218	-0.0262666	-0.183106	0.174021	0.89469	SE
chr10	85538821	85540821	-0.112064	-0.748221	-1.40003	0.0542423	SE
chr10	85542495	85544495	-1.27294	-1.2455	-3.6225	0.0102076	SE
chr10	21090332	21092332	-1.76387	-1.54261	-2.44677	0.574497	SE
chr10	44389711	44391711	0.0740057	-0.982525	-1.27362	0.0332384	SE
chr10	44391174	44393174	-0.0882915	-0.670518	-1.13257	0.188209	SE
chr10	59963732	59965732	-0.935866	0.0391834	1.52683	0.235635	SE
chr10	59971715	59973715	-0.120223	-0.142069	1.7274	0.0589844	SE
chr10	59973342	59975342	-0.541223	-0.93146	0.79847	0.226499	SE
chr10	77192102	77194102	0.223768	-0.0256701	0.0620934	0.903723	SE
chr10	77192730	77194730	0.506955	0.1399	0.29143	0.58332	SE
chr10	77198338	77200338	0.444262	-0.262749	-1.7198	7.02457e-05	SE
chr11	8568543	8570543	0.494915	-0.045724	0.113694	0.942624	SE
chr11	8574850	8576850	1.78361	0.621336	-0.176705	0.399675	SE
chr11	8585365	8587365	1.00482	0.77584	-1.17393	0.570179	SE
chr11	33543262	33545262	0.584343	0.439492	-0.35727	0.477336	SE
chr11	33550088	33552088	-1.42111	-1.55044	-0.367347	0.119239	SE
chr11	77883707	77885707	0.061958	0.119189	-1.40479	0.241505	SE
chr11	77903943	77905943	0.133882	0.867338	0.596373	0.297663	SE
chr11	88619380	88621380	-0.133764	0.27672	0.911006	0.154791	SE
chr11	88624021	88626021	0.701516	0.14609	-0.386889	0.284359	SE
chr11	107448261	107450261	-0.338516	-0.871796	0.107639	0.769476	SE
chr11	62510372	62512372	0.79538	0.247692	-0.105925	0.186418	SE
chr11	62512299	62514299	0.540947	-0.298447	-0.94652	0.172188	SE
chr11	67010827	67012827	0.782262	0.991402	-0.64992	0.0304844	SE
chr11	67017048	67019048	0.846366	0.852712	-0.856011	0.445284	SE
chr11	67019646	67021646	0.502551	-0.937609	-2.13448	0.313833	SE
chr11	98961581	98963581	1.40667	0.864396	1.67939	0.577993	SE
chr11	98963768	98965768	1.07224	0.314108	1.01483	0.752453	SE
chr11	104288400	104290400	0.114225	-0.203654	0.104972	0.835356	SE
chr11	104294854	104296854	0.362107	-0.294952	0.84293	0.297663	SE
chr11	104304918	104306918	1.04153	-0.00076133	-3.99865	0.0388119	SE
chr11	117080964	117082964	1.99087	1.38078	-0.131959	0.363255	SE
chr11	12468894	12470894	-0.135885	-0.424378	-2.35955	0.461263	SE
chr11	33526496	33528496	-0.039967	-0.0191818	-0.878838	0.192647	SE
chr11	33532705	33534705	0.562798	0.168864	-0.583455	0.399869	SE
chr11	33536521	33538521	0.00232669	-0.327272	-0.499549	0.229211	SE
chr11	69703178	69705178	0.266663	0.34198	-1.42523	0.0310855	SE
chr11	69707537	69709537	-0.308931	-0.00202114	-1.71616	0.00151655	SE
chr11	102328792	102330792	-0.0687003	-0.0570072	-0.789374	0.471047	SE
chr11	102330910	102332910	0.478721	0.195314	-0.253581	0.605645	SE
chr11	117974226	117976226	0.924415	1.37895	0.596116	0.0157247	SE
chr11	117975119	117977119	0.797329	1.04175	0.522698	0.159392	SE
chr11	117975559	117977559	0.541994	0.812925	0.303111	0.536139	SE
chr12	12926461	12928461	0.0638892	-0.0247869	-0.602043	0.922478	SE
chr12	86465385	86467385	0.508783	-0.00107922	-0.287741	0.772779	SE
chr12	86478047	86480047	0.678343	0.452176	-0.576851	0.810233	SE
chr12	86497922	86499922	-0.384795	-0.640553	-0.17779	0.767912	SE
chr12	86500782	86502782	0.109499	0.490609	-0.53206	0.511403	SE
chr12	86503615	86505615	-0.563252	-1.17	-1.09263	0.0967013	SE
chr12	56295715	56297715	-0.103	-0.000458484	-0.481606	0.942624	SE
chr12	56297633	56299633	0.184973	-0.0354807	-1.03287	0.797861	SE
chr12	86897574	86899574	-0.282425	0.14491	0.118718	0.784039	SE
chr12	86902944	86904944	-0.092077	-0.00953059	-0.087965	0.994301	SE
chr12	110416851	110418851	1.03724	0.150448	0.173701	0.615124	SE
chr13	97291515	97293515	-0.558232	0.916013	0.730445	0.481546	SE
chr13	109631933	109633933	0.17347	0.475421	0.465952	0.903723	SE
chr13	63967895	63969895	0.0300761	0.495501	0.894913	0.190073	SE
chr13	63979198	63981198	-0.14605	0.242624	0.134351	0.895865	SE
chr14	63511714	63513714	0.677237	0.760434	-0.106272	0.66834	SE
chr14	76629142	76631142	-1.01029	-2.65937	-0.890129	0.399675	SE
chr14	76494254	76496254	-0.374232	-0.775593	-0.94035	0.532719	SE
chr14	64631848	64633848	-0.499429	-0.326877	-0.345003	0.918382	SE
chr14	64639560	64641560	-0.388358	-0.0118745	-3.04198	0.141188	SE
chr14	76624060	76626060	0.634169	-0.515747	0.928738	0.197339	SE
chr14	99338997	99340997	0.301919	-0.0264762	-1.981	1.47587e-05	SE
chr14	105899954	105901954	0.143546	-0.0100534	-2.10116	0.0929096	SE
chr15	77354907	77356907	-1.07324	-0.378091	-0.260953	0.417784	SE
chr15	88707993	88709993	-0.142716	-0.5651	-0.789876	0.000653371	SE
chr15	25739596	25741596	-0.213843	-0.164068	-0.765114	0.723534	SE
chr15	25753251	25755251	-0.203451	0.131626	0.0640113	0.804229	SE
chr15	25761296	25763296	0.773973	0.613451	1.25856	0.0254547	SE
chr15	25767059	25769059	0.0326091	0.401008	0.92599	0.283193	SE
chr15	25768911	25770911	-0.55793	-0.0270122	0.880811	0.0136118	SE
chr15	25772863	25774863	0.989552	-0.372378	1.01049	0.42264	SE
chr15	62086150	62088150	1.25705	1.16469	-0.703915	0.505505	SE
chr15	62091811	62093811	0.686591	0.787349	0.516375	0.341125	SE
chr15	97367952	97369952	0.00726226	0.438151	-0.276507	0.726073	SE
chr15	97375523	97377523	0.324578	0.27705	-0.58713	0.422969	SE
chr15	77337855	77339855	-0.347544	0.0709092	-0.62645	0.671139	SE
chr15	97591842	97593842	0.349891	0.345264	-1.09423	0.00335745	SE
chr15	97593083	97595083	0.109971	0.415508	-0.8849	0.000694604	SE
chr16	8772159	8774159	-0.101991	-0.0817404	-3.11575	0.062774	SE
chr16	8777860	8779860	1.12819	0.788488	-3.09945	0.0327725	SE
chr16	23098831	23100831	0.933847	0.124243	0.468566	0.240863	SE
chr16	23101766	23103766	0.206516	0.658322	0.258046	0.583209	SE
chr16	84778539	84780539	0.372907	-0.493229	-0.242673	0.841551	SE
chr16	84768809	84770809	-0.141643	-0.226717	-0.932423	0.459995	SE
chr17	29450414	29452414	0.292702	0.364164	0.556611	0.619682	SE
chr17	45455832	45457832	0.714196	-0.33732	-1.92992	3.77497e-22	SE
chr17	45458083	45460083	0.578264	-0.0694303	-1.29995	1.77977e-07	SE
chr17	66483159	66485159	-0.304978	-0.806479	0.342527	0.0518902	SE
chr17	66485751	66487751	-0.571021	-0.91294	-0.641968	0.64257	SE
chr17	70827658	70829658	0.355548	0.0507578	-0.245486	0.630925	SE
chr17	70829140	70831140	0.652348	0.279016	0.0209631	0.583209	SE
chr17	26494158	26496158	-0.96462	1.64318	4.01135	0.000721279	SE
chr17	31801911	31803911	0.696459	0.517142	-1.94148	0.172147	SE
chr17	31805705	31807705	0.123845	0.138756	-0.483968	0.817429	SE
chr17	31807411	31809411	-0.735774	0.103171	-0.180479	0.588246	SE
chr17	31810601	31812601	0.792736	0.587736	-0.323357	0.10191	SE
chr17	31818483	31820483	0.48513	0.176215	-0.010813	0.782312	SE
chr17	36994617	36996617	-0.0892287	-0.279201	-1.56959	7.032e-05	SE
chr17	36996600	36998600	-0.309586	-0.722619	-2.60107	1.74669e-12	SE
chr17	66468830	66470830	0.456425	0.294441	0.525247	0.643857	SE
chr17	66479447	66481447	0.00892678	-0.0596083	0.215513	0.755656	SE
chr18	75360113	75362113	-0.476859	0.430386	-0.907729	0.359327	SE
chr18	75578524	75580524	0.641403	-0.0293088	0.695839	0.935319	SE
chr18	38627953	38629953	0.807367	1.57486	-0.127384	0.0467975	SE
chr18	38635493	38637493	0.902561	0.750085	-0.296265	0.00444954	SE
chr18	40307209	40309209	-0.413069	-0.45452	-1.06555	0.358849	SE
chr18	35042429	35044429	-0.11968	0.0919728	0.247762	0.942624	SE
chr18	36252859	36254859	0.0986832	-0.230109	-0.150581	0.757109	SE
chr18	38377898	38379898	0.821373	0.658958	-0.906314	0.00639867	SE
chr18	38379369	38381369	0.903422	0.921404	-1.20609	2.91659e-07	SE
chr18	38383411	38385411	0.682347	1.03287	-0.00142755	0.109873	SE
chr18	38385688	38387688	0.312921	0.432424	-0.722545	0.61916	SE
chr18	61627277	61629277	0.717323	0.21169	0.463305	0.197339	SE
chr18	61627720	61629720	0.771271	0.392608	0.534739	0.191449	SE
chr18	75344024	75346024	0.81672	0.655682	1.08197	0.216856	SE
chr19	53448279	53450279	0.25718	-0.192065	0.353033	0.922668	SE
chr19	21783633	21785633	0.591972	-0.253034	-0.19247	0.750609	SE
chr19	21788282	21790282	-0.061378	-0.746731	-0.176103	0.810233	SE
chr19	21790841	21792841	-0.598295	-0.970462	-0.253423	0.113638	SE
chr19	23086698	23088698	0.122714	-0.564569	-1.39014	0.00941104	SE
chr19	23088977	23090977	-0.184394	-0.347013	-1.48919	3.09169e-06	SE
chr19	23094192	23096192	0.24529	0.295287	-1.15254	0.0856346	SE
chr19	25478332	25480332	-0.277977	0.216538	0.615384	0.615124	SE
chr19	25485687	25487687	0.0969037	0.0972198	0.769429	0.015887	SE
chr19	25487350	25489350	0.270927	0.393456	0.629612	0.520598	SE
chr2	31059770	31061770	-0.163626	-0.435063	-1.26264	0.0656502	SE
chr2	31068081	31070081	-0.0203539	1.12333	0.454849	0.196657	SE
chr2	152176486	152178486	0.734143	0.640132	-1.21328	1.03461e-07	SE
chr2	20652382	20654382	0.321928	-0.291964	-0.0831468	0.506451	SE
chr2	20654243	20656243	-0.244618	-0.418231	-0.073255	0.812836	SE
chr2	20664712	20666712	-0.0529788	-0.868909	0.28429	0.856844	SE
chr2	20668624	20670624	0.0640694	-0.973646	1.60864	0.0420199	SE
chr2	32161654	32163654	-0.181718	0.603801	0.235017	0.760823	SE
chr2	163030785	163032785	0.0742791	-0.365785	-0.411834	0.646719	SE
chr2	163033863	163035863	-0.268285	0.12643	-0.0678825	0.983921	SE
chr2	33437718	33439718	-0.429549	0.001739	0.0624071	0.663513	SE
chr2	33438751	33440751	-0.292574	-0.336939	-0.171954	0.821703	SE
chr2	71649367	71651367	-0.155408	0.25347	-0.469352	0.907059	SE
chr2	71651618	71653618	-0.194666	0.181017	-0.531427	0.814507	SE
chr2	71654961	71656961	0.39795	0.231018	0.672714	0.718679	SE
chr2	152726023	152728023	1.03523	0.0178768	-0.139383	0.379797	SE
chr2	154416199	154418199	-0.244818	0.0988331	-0.620478	0.532527	SE
chr2	154422696	154424696	-0.10771	-0.0593643	-1.16417	0.00503622	SE
chr2	154425518	154427518	-0.327728	-0.298928	-0.748409	0.0242105	SE
chr2	154427089	154429089	-0.359201	-0.283478	-1.27527	6.32661e-07	SE
chr2	168779217	168781217	0.325565	-0.144045	-1.03734	0.674418	SE
chr2	168790220	168792220	-0.380568	-0.567008	0.499154	0.363366	SE
chr3	133517879	133519879	1.07726	1.18152	-1.46046	0.0311063	SE
chr3	133523893	133525893	-0.269027	-0.310163	-1.24848	0.724785	SE
chr3	133531657	133533657	0.0391355	0.16832	-1.26886	0.566477	SE
chr3	133532987	133534987	0.0182247	0.00303563	-1.36889	0.0208739	SE
chr3	95662704	95664704	-1.39816	-1.42351	-0.364696	0.287855	SE
chr3	96674800	96676800	-0.0727105	-0.33386	-1.53413	0.0894751	SE
chr3	96679532	96681532	0.664455	1.18729	-0.860803	0.228404	SE
chr3	129547999	129549999	0.842187	-0.0649276	-0.588634	0.675008	SE
chr3	129548812	129550812	0.900511	0.177497	-0.730172	0.377987	SE
chr3	135545584	135547584	0.561614	0.290619	-0.908018	0.0388119	SE
chr3	135546516	135548516	0.425361	0.661979	-1.15243	0.34805	SE
chr3	9640994	9642994	-0.0775238	-0.17104	-0.543642	0.847763	SE
chr3	34734123	34736123	-0.166554	0.504871	-0.218181	0.77566	SE
chr3	34744373	34746373	-1.06914	-0.49009	-0.208254	0.732956	SE
chr3	34755736	34757736	-0.173274	-0.299771	0.141376	0.442856	SE
chr3	34757043	34759043	-0.0139782	-0.224775	0.22847	0.578148	SE
chr3	34759400	34761400	-0.0280273	-0.200588	-0.310482	0.905923	SE
chr3	34760420	34762420	-0.174303	0.000975677	-0.529956	0.723534	SE
chr3	95650481	95652481	-0.132835	-0.305581	-0.104393	0.673587	SE
chr3	103203646	103205646	-0.175336	0.450175	1.30298	0.497094	SE
chr3	103207028	103209028	-0.199729	0.0417812	0.642641	0.216856	SE
chr3	103213734	103215734	0.237348	1.12033	1.31506	0.34805	SE
chr4	141564487	141566487	-0.0246731	-0.606652	-1.22119	0.100408	SE
chr4	141569139	141571139	0.227211	-0.953269	-1.19946	0.0208739	SE
chr4	142060077	142062077	0.351309	0.878302	2.76343	0.159688	SE
chr4	142068413	142070413	0.542959	0.51903	0.364135	0.914476	SE
chr4	142070071	142072071	-0.160681	0.656969	0.774788	0.0471043	SE
chr4	142070672	142072672	-0.637544	0.279136	0.438745	0.0842358	SE
chr4	142165511	142167511	0.0810041	-0.182894	1.48692	0.0494475	SE
chr4	142168890	142170890	1.06628	-0.44573	1.55187	0.0997162	SE
chr4	155188874	155190874	-0.289832	0.781017	2.60346	0.00754197	SE
chr4	125533757	125535757	-0.0629828	-0.0361905	0.975629	0.631325	SE
chr4	127197948	127199948	-0.349872	-0.77854	-0.493003	0.895347	SE
chr4	137596465	137598465	0.276134	-0.299193	-0.238741	0.718299	SE
chr4	138444130	138446130	0.813154	0.558999	0.892077	0.543562	SE
chr4	138448783	138450783	0.526039	2.27681	3.42444	0.0406704	SE
chr4	141281570	141283570	0.302774	-0.00210639	0.181115	0.751748	SE
chr4	141283606	141285606	0.403278	-0.299536	-0.430861	0.0263746	SE
chr4	55474608	55476608	-0.583698	-0.480361	-2.72968	1.85862e-06	SE
chr4	55476697	55478697	-0.445493	-1.12227	-1.85081	9.51561e-14	SE
chr4	98840318	98842318	-0.764538	-0.913547	-2.48569	0.00975112	SE
chr4	98845223	98847223	0.740757	-0.672575	-0.754034	0.333287	SE
chr4	119072004	119074004	0.498546	0.305549	1.32788	3.80896e-07	SE
chr4	130519257	130521257	0.0971636	-0.259624	-0.738262	0.00475425	SE
chr4	130639181	130641181	0.320993	-0.214087	-0.684029	0.142449	SE
chr4	137800451	137802451	-0.370235	0.942774	1.49002	0.0128704	SE
chr4	141269450	141271450	0.464057	2.1638	2.16088	0.0208681	SE
chr4	141563875	141565875	0.0415557	-0.565431	-1.43312	3.87035e-05	SE
chr5	116407229	116409229	0.360626	0.37842	0.116553	0.836068	SE
chr5	116409263	116411263	0.635152	0.236567	0.155555	0.580763	SE
chr5	119579069	119581069	-0.775127	-1.57887	-2.21383	0.415357	SE
chr5	119583853	119585853	0.0539035	-2.27727	-4.91387	0.0083911	SE
chr5	119585577	119587577	0.175666	-1.51827	-2.08575	0.0216072	SE
chr5	53554060	53556060	0.105698	-0.281719	-0.441753	0.817429	SE
chr5	53554756	53556756	0.0479136	-0.478177	-0.487034	0.810438	SE
chr5	118508987	118510987	1.7682	1.6281	0.378151	0.498497	SE
chr5	33530466	33532466	0.481065	0.406052	-0.0452921	0.161052	SE
chr5	33534693	33536693	0.461789	0.0554572	-0.00146118	0.388098	SE
chr5	33536671	33538671	-0.242765	-0.247968	-0.683728	0.810233	SE
chr5	64864025	64866025	0.264327	-0.212869	-0.522725	0.297663	SE
chr5	113344909	113346909	0.718731	-0.151624	-0.637515	0.0448745	SE
chr5	118434424	118436424	0.545656	0.191136	0.412527	0.398882	SE
chr5	118436021	118438021	0.319006	-0.08747	-0.367536	0.245944	SE
chr5	118444329	118446329	-0.415859	-0.260368	-1.04831	0.333287	SE
chr5	119705981	119707981	0.545403	0.0933913	0.16355	0.878486	SE
chr5	119709029	119711029	0.0730644	-0.693564	0.00362806	0.770615	SE
chr5	119720017	119722017	0.861229	2.01368	3.67042	0.0428158	SE
chr6	122763996	122765996	0.0463027	-0.23249	0.407856	0.393018	SE
chr6	122764812	122766812	-0.134982	-0.193367	0.423367	0.325107	SE
chr6	122765421	122767421	0.406409	0.00866101	-0.179742	0.584061	SE
chr6	122769503	122771503	0.166745	-0.707104	-1.85604	0.00412503	SE
chr6	143107750	143109750	0.977294	0.299708	-2.41246	0.000168366	SE
chr6	143115938	143117938	0.0509678	1.99262	-0.256974	0.302373	SE
chr6	31896204	31898204	-0.668908	-1.4402	-1.87708	0.572171	SE
chr6	31897850	31899850	0.0201137	-2.28067	-1.25026	0.309906	SE
chr6	83889478	83891478	-1.27386	-0.612674	-0.157432	0.755774	SE
chr6	122701827	122703827	-0.0751616	-0.190994	1.3151	0.000168366	SE
chr6	145274256	145276256	0.338196	0.171798	0.622976	0.528318	SE
chr6	145275430	145277430	0.312429	0.275322	0.496122	0.774268	SE
chr6	39445176	39447176	0.209238	-0.120945	-1.38715	3.6322e-08	SE
chr6	65010659	65012659	0.170862	-0.978073	-2.34916	0.0652051	SE
chr6	65021080	65023080	0.344037	-0.140838	-1.32708	1.77977e-07	SE
chr6	65023745	65025745	0.414657	-0.498091	-1.20548	0.00291655	SE
chr6	67110737	67112737	0.0356458	0.120589	-1.12622	0.0110916	SE
chr6	122661985	122663985	0.050487	-0.194252	-1.07158	0.194992	SE
chr6	122663003	122665003	0.391895	-0.404594	-1.08544	0.209502	SE
chr6	125432787	125434787	-0.0150261	-0.707632	-1.24985	3.08134e-06	SE
chr6	125441755	125443755	0.436509	-0.365374	-0.274351	0.470625	SE
chr6	125446525	125448525	0.102803	-0.218598	-0.0997628	0.903723	SE
chr6	142510661	142512661	-1.73611	-0.733922	-0.481262	0.287813	SE
chr6	142511958	142513958	-2.53835	-0.464227	0.446034	0.18589	SE
chr7	3209835	3211835	-0.0537996	-0.163088	-1.56737	0.0530839	SE
chr7	3211194	3213194	-0.26169	-0.438079	-2.0821	8.28038e-06	SE
chr7	3212666	3214666	-0.12783	-0.702944	-1.52175	6.93186e-07	SE
chr7	4820099	4822099	0.0301835	0.60458	0.962217	0.72767	SE
chr7	4824640	4826640	-0.168674	0.733633	0.395602	0.88231	SE
chr7	133111767	133113767	-0.114608	-0.196483	0.0714254	0.966873	SE
chr7	133114061	133116061	-0.178299	-0.063393	0.535437	0.461263	SE
chr7	13013480	13015480	-0.189455	-0.495606	-0.76744	0.0896309	SE
chr7	63956163	63958163	-0.520322	-0.115347	0.318331	0.541571	SE
chr7	112687662	112689662	0.558653	-0.0204145	0.674902	0.377987	SE
chr7	112690442	112692442	0.711131	0.625894	0.988546	0.469658	SE
chr7	144850470	144852470	-0.0397838	0.257838	-0.586997	0.843736	SE
chr7	144857078	144859078	-0.391082	-0.28001	-0.453854	0.813433	SE
chr7	144863414	144865414	-0.151093	-1.23546	-1.1691	0.211097	SE
chr7	3192342	3194342	-0.0112785	-0.666287	-1.06674	0.0606929	SE
chr7	3200398	3202398	-0.352111	-0.535608	-1.78675	3.23421e-09	SE
chr7	3203292	3205292	0.275336	-0.76587	-1.9967	2.03627e-10	SE
chr7	3205765	3207765	-0.297709	-0.486961	-0.966545	0.00790399	SE
chr7	38027219	38029219	-0.665645	-0.652722	-1.16462	0.200719	SE
chr7	38028348	38030348	-0.107818	0.00288141	0.0427441	0.981456	SE
chr7	38029811	38031811	-0.121094	-0.0657162	0.423961	0.466201	SE
chr7	79210537	79212537	0.208529	0.236456	0.431593	0.916779	SE
chr7	79222110	79224110	-1.0766	-1.29031	0.382365	0.285473	SE
chr7	80014546	80016546	-0.0734986	-0.188294	-0.533629	0.611943	SE
chr7	80129624	80131624	-0.402883	-0.675319	-0.5305	0.292077	SE
chr8	33912252	33914252	-0.536374	-0.253084	-1.32923	0.322624	SE
chr8	33913691	33915691	-0.0455033	-0.296123	-0.0522268	0.903723	SE
chr8	33915434	33917434	0.972346	0.486068	0.135952	0.306543	SE
chr8	36593000	36595000	0.950713	1.20676	0.459741	0.846287	SE
chr8	36602947	36604947	0.0675046	-0.379302	-0.615187	0.952563	SE
chr8	84649458	84651458	-0.821548	-0.457641	-1.67122	0.448124	SE
chr8	36538485	36540485	0.0568403	-0.3977	-1.81793	3.1349e-06	SE
chr8	36547248	36549248	-0.33366	-0.334307	-1.94432	0.000121862	SE
chr8	36548198	36550198	-0.363407	-0.518284	-1.88423	1.18984e-08	SE
chr8	36549334	36551334	-0.41825	-0.504483	-1.77741	8.98418e-06	SE
chr8	43319891	43321891	-1.38839	-0.263336	-0.51429	0.651838	SE
chr8	72310185	72312185	0.661909	0.423523	-0.548629	0.235864	SE
chr8	72312013	72314013	1.04317	0.826174	-0.366744	0.176256	SE
chr8	85472165	85474165	-0.557535	-0.947725	0.125302	0.0743147	SE
chr8	88990853	88992853	0.856728	0.25332	-2.37401	0.0125186	SE
chr8	89002694	89004694	-0.340787	-0.323121	-1.86054	7.79416e-05	SE
chr8	89005770	89007770	-0.0627559	-0.130581	-1.28647	0.000225792	SE
chr8	89014832	89016832	-0.0275191	-0.0199673	-1.63791	0.00110521	SE
chr9	58278736	58280736	-0.396627	-0.461783	-0.397531	0.592372	SE
chr9	78359119	78361119	-1.06203	0.348785	0.0601017	0.725741	SE
chr9	78373839	78375839	-0.690733	-0.171562	-0.476279	0.828569	SE
chr9	114548309	114550309	-0.403286	-0.121588	0.59208	0.903723	SE
chr9	114556365	114558365	1.40262	1.34016	2.49983	0.512011	SE
chr9	58271322	58273322	0.336435	0.257422	-0.851105	0.712721	SE
chr9	110959485	110961485	-0.523696	-0.432204	-0.0612483	0.802392	SE
chr9	120678876	120680876	1.4069	0.846866	0.473441	0.0825054	SE
chr9	120689648	120691648	0.5777	0.858433	2.11958	0.0714178	SE
chr9	121334728	121336728	0.286349	1.5173	0.180377	0.659642	SE
chr9	121336810	121338810	1.60774	2.44257	1.12663	0.31577	SE
chr9	56534043	56536043	0.910102	-0.345269	-0.249232	0.680146	SE
chr9	58273744	58275744	0.100124	-0.22864	-0.57217	0.267213	SE
chrX	8001254	8003254	-0.330967	-0.104682	-1.48109	0.648408	SE
chrX	8002033	8004033	0.672608	0.340671	0.259383	0.938044	SE
chrX	8007853	8009853	-0.773719	-0.575311	-1.74803	0.399677	SE
chrX	8012559	8014559	-0.0177547	-0.355781	-1.83229	0.190398	SE
chrX	52752628	52754628	0.480891	0.243982	-0.965234	0.00655745	SE
chrX	52758469	52760469	-0.0759796	0.127722	-0.576841	0.824348	SE
chrX	52759709	52761709	0.100997	0.0968287	-0.394248	0.856844	SE
chr1	22376347	22378347	0.0601939	-0.468319	-2.53269	0.526727	E
chr1	38795993	38797993	-0.604327	-0.617492	-3.02567	0.322681	E
chr1	52952628	52954628	0.0368399	0.507558	0.0178704	0.764801	E
chr1	53749152	53751152	-0.295564	-0.017221	0.599042	0.634048	E
chr1	63243040	63245040	0.556181	1.10876	0.130087	0.063614	E
chr1	71645264	71647264	0.0416895	-0.344251	-0.572644	0.907059	E
chr1	80315019	80317019	-1.57691	-0.274807	-1.75837	0.341865	E
chr1	84270261	84272261	-0.305011	-0.333133	1.05092	0.73528	E
chr1	88668030	88670030	1.34696	0.604033	2.33949	0.000546963	E
chr1	105490619	105492619	0.531471	0.646528	0.161148	0.942624	E
chr1	119048331	119050331	0.115554	0.467564	2.14573	0.215585	E
chr1	128094049	128096049	0.131549	0.655368	0.835054	0.856914	E
chr1	133018411	133020411	-0.238958	-0.55615	0.440501	0.168169	E
chr1	133396762	133398762	-0.0820171	0.561169	0.625019	0.935319	E
chr1	133671038	133673038	-0.628916	-0.210938	0.120015	0.570179	E
chr1	133693520	133695520	-0.528545	-0.534139	0.566767	0.0406704	E
chr1	133695057	133697057	-0.280964	-0.541663	0.514874	0.0806451	E
chr1	133709879	133711879	0.117512	-0.258779	0.895536	0.843736	E
chr1	134534201	134536201	-0.988799	-1.3824	-1.70866	2.22056e-06	E
chr1	135631455	135633455	-0.720557	-1.30458	-0.567007	0.606635	E
chr1	135636950	135638950	0.485543	0.195747	-1.08677	0.777786	E
chr1	136569216	136571216	0.340872	0.370892	-0.149934	0.101065	E
chr1	136612457	136614457	0.87259	1.09406	0.316802	0.0267398	E
chr1	151543874	151545874	-0.250367	-0.830257	-3.75212	0.147666	E
chr1	153215681	153217681	-1.09019	-1.15859	-3.44013	0.0444265	E
chr1	156667854	156669854	0.34396	-0.272254	0.575874	0.927198	E
chr1	156668767	156670767	0.261975	-0.739947	-0.100372	0.895865	E
chr1	156993970	156995970	-0.934416	0.286381	-2.10318	0.532322	E
chr1	7046414	7048414	-0.983906	0.389432	-1.12751	0.536967	E
chr1	11466298	11468298	0.546163	1.27996	-0.114127	0.800212	E
chr1	12813525	12815525	-0.316064	-0.588358	0.104207	0.873053	E
chr1	34006197	34008197	0.260922	-0.507561	0.456317	0.800176	E
chr1	34102723	34104723	0.0288035	0.493044	0.863897	0.0414978	E
chr1	45357226	45359226	-1.30582	-0.256551	-0.349611	0.737126	E
chr1	59697001	59699001	-0.986518	-0.69972	-0.837502	0.176048	E
chr1	60431770	60433770	0.576795	0.656543	1.57545	0.686265	E
chr1	62180886	62182886	-0.33206	-0.609267	-2.91912	0.448413	E
chr1	62766825	62768825	-0.814917	0.305019	-0.71327	0.571744	E
chr1	64575815	64577815	-2.50447	-0.805519	-2.3841	0.132567	E
chr1	86307567	86309567	-0.0630889	-0.0392217	0.643144	0.104747	E
chr1	86308473	86310473	-0.0547151	0.1324	0.477414	0.614831	E
chr1	86310368	86312368	-0.148565	-0.18863	0.511183	0.235692	E
chr1	87224044	87226044	-0.554368	0.241398	1.11732	0.437844	E
chr1	87225585	87227585	-0.344967	-0.583852	0.0694855	0.820342	E
chr1	87229779	87231779	-0.635184	0.0680238	-0.379751	0.862602	E
chr1	87312676	87314676	-0.94693	-0.95686	-1.65724	0.157428	E
chr1	87728240	87730240	-0.492649	-0.562974	-0.275638	0.961373	E
chr1	118688946	118690946	-0.211258	-0.894745	0.741445	0.712721	E
chr1	127903968	127905968	-2.48984	-0.557154	-3.13512	0.044806	E
chr1	132262851	132264851	0.163252	-0.117359	-0.977538	0.0342295	E
chr1	132287410	132289410	1.82729	1.48212	0.989914	0.131547	E
chr1	132321965	132323965	0.868909	2.50499	2.92131	0.197339	E
chr1	134569850	134571850	0.0887866	-1.56976	-0.719179	0.674418	E
chr1	135723296	135725296	-1.91737	-2.2561	-0.982823	0.302373	E
chr1	136673916	136675916	-0.00306189	-0.0707466	-0.941435	0.154791	E
chr1	139493800	139495800	1.05369	-0.37428	-0.968736	0.325107	E
chr1	164376271	164378271	-0.491749	0.297098	0.365063	0.903914	E
chr1	164493506	164495506	-0.00330611	-0.339296	-0.504687	0.817592	E
chr1	170891528	170893528	0.337224	-0.155772	-4.15312	0.0867418	E
chr1	181741581	181743581	0.492277	-0.450655	-2.42492	0.360204	E
chr1	185104222	185106222	-0.644597	-0.274776	0.351887	0.786926	E
chr1	185207755	185209755	0.266012	0.249795	-1.96483	0.0131013	E
chr1	189760792	189762792	-0.549171	-0.135637	0.337747	0.847763	E
chr1	6447575	6449575	-0.689406	0.740686	-1.03548	0.612056	E
chr1	11329377	11331377	-2.26207	-0.583383	0.138404	0.197162	E
chr1	11395073	11397073	-0.755796	-0.586789	0.532482	0.503951	E
chr1	15788353	15790353	0.0962035	0.407158	-0.107561	0.982725	E
chr1	15790881	15792881	0.125754	-0.0805709	0.0263947	0.967184	E
chr1	35840827	35842827	-1.70508	-0.541624	-0.768067	0.261414	E
chr1	35943528	35945528	0.0682156	0.0373186	0.974157	0.702169	E
chr1	54383533	54385533	0.348186	0.458076	0.228355	0.903723	E
chr1	55107753	55109753	-0.0462576	0.153959	-0.11849	0.923819	E
chr1	59422279	59424279	-0.608743	0.520254	-0.84117	0.679649	E
chr1	59471960	59473960	-1.31965	-0.0839818	-0.131567	0.355188	E
chr1	60850111	60852111	-0.0115054	0.859346	0.729365	0.34984	E
chr1	60851521	60853521	-0.187584	0.446539	0.34266	0.572171	E
chr1	60852619	60854619	0.0427019	0.186741	0.43603	0.895865	E
chr1	63441314	63443314	-0.115601	-0.992366	-1.00131	0.00273069	E
chr1	67935014	67937014	0.573613	0.70049	0.422442	0.941036	E
chr1	74824152	74826152	-0.536948	0.126594	0.244951	0.87846	E
chr1	86487923	86489923	-0.292846	-0.2756	-0.100266	0.361743	E
chr1	88612186	88614186	-0.606361	-0.157224	1.50999	2.49499e-05	E
chr1	88806023	88808023	-0.377168	-1.7466	-1.56123	0.297663	E
chr1	88809045	88811045	0.151106	-0.0149374	-1.38294	0.27811	E
chr1	88838795	88840795	-1.58871	-1.73709	-2.148	0.246795	E
chr1	105012069	105014069	-1.29356	1.08001	0.744828	0.261414	E
chr1	105070197	105072197	-0.472242	-2.48104	-1.86993	0.197339	E
chr1	120076914	120078914	-0.472458	-0.101644	0.529147	0.800212	E
chr1	121841939	121843939	-0.247107	-0.580595	-0.638223	0.927814	E
chr1	131889437	131891437	0.29841	-0.284839	-1.79423	5.81437e-05	E
chr1	132849975	132851975	-0.762889	-1.01602	0.117491	0.760164	E
chr1	133492079	133494079	-0.474777	0.717435	1.50875	0.00364543	E
chr1	133503764	133505764	0.137056	0.521918	-0.0664735	0.883295	E
chr1	133666829	133668829	-0.194207	-0.425756	0.366681	0.0115371	E
chr1	135216851	135218851	0.361776	0.0549663	0.619138	0.956866	E
chr1	136456545	136458545	0.758898	-0.224841	1.00347	0.757109	E
chr1	136583192	136585192	1.0781	0.897688	0.31876	0.000258629	E
chr1	137050923	137052923	-0.406158	0.210239	-0.332295	0.940305	E
chr1	137173278	137175278	0.425277	-0.146451	-1.35009	0.364679	E
chr1	140187760	140189760	-1.08203	0.781407	-0.528955	0.481546	E
chr1	150496124	150498124	0.167047	0.261594	1.1975	0.581019	E
chr1	151176592	151178592	-0.302309	-0.314851	-1.84121	0.64597	E
chr1	152792989	152794989	0.654174	0.661844	1.27141	0.090089	E
chr1	152914844	152916844	-0.446792	-0.18927	-0.447828	0.86457	E
chr1	152916732	152918732	0.146131	0.287639	-0.306998	0.895486	E
chr1	153198640	153200640	-0.768164	-0.470039	-1.93714	0.471775	E
chr1	153375771	153377771	1.39523	0.362826	0.420104	0.324539	E
chr1	164017402	164019402	-0.290086	0.380324	-0.422912	0.85098	E
chr1	164018921	164020921	-0.558188	-0.717086	-0.567553	0.832767	E
chr1	164530931	164532931	0.127209	-1.48742	-2.23275	0.318926	E
chr1	171089208	171091208	-0.252381	-0.324	0.93006	0.000168366	E
chr1	178283150	178285150	-0.345408	1.5568	3.61869	1.52181e-13	E
chr1	182093492	182095492	-1.68706	0.021575	-2.01092	0.378208	E
chr1	182102690	182104690	0.0259264	-0.360316	-2.71959	0.000388036	E
chr1	182180925	182182925	0.348532	1.55906	2.80996	0.0448745	E
chr1	182190311	182192311	-0.457368	-1.61448	-1.41721	0.163495	E
chr1	185955056	185957056	-0.0211031	0.761017	-0.110491	0.891246	E
chr1	186235559	186237559	0.0770821	-0.524431	-2.48532	0.445789	E
chr1	186921968	186923968	0.138412	0.767104	-0.425372	0.84126	E
chr1	189012547	189014547	0.128252	0.375963	1.24314	0.34984	E
chr1	191929744	191931744	-0.922869	0.00187567	-1.89785	0.399044	E
chr1	192869463	192871463	0.779871	1.36508	2.46319	0.0884519	E
chr10	4374382	4376382	1.49478	2.20982	3.09539	0.0205147	E
chr10	7645087	7647087	0.322151	-1.25364	1.65741	0.175972	E
chr10	12613698	12615698	1.53462	1.64763	1.64169	0.718679	E
chr10	17575564	17577564	0.199104	0.525311	0.639652	0.903723	E
chr10	24589855	24591855	-0.875665	-0.0101911	0.0615702	0.757109	E
chr10	24833916	24835916	0.289427	0.685642	1.46285	0.365844	E
chr10	30736553	30738553	0.215499	-0.743535	-4.29441	0.0652224	E
chr10	41606569	41608569	-0.734991	-0.174564	0.201563	0.782312	E
chr10	49416488	49418488	-1.34276	-0.707119	-1.16373	0.810438	E
chr10	59557757	59559757	1.3028	2.6683	3.07301	0.165857	E
chr10	59579827	59581827	2.12148	1.8344	1.4114	0.572721	E
chr10	60552357	60554357	0.397556	-0.115078	-0.00473423	0.940305	E
chr10	60726801	60728801	0.639335	-0.608919	3.77274	7.82596e-09	E
chr10	61828266	61830266	1.03237	1.24466	0.855067	0.459995	E
chr10	61830971	61832971	0.576151	0.855761	0.792479	0.712784	E
chr10	61928321	61930321	0.0217519	0.641771	1.03745	0.355224	E
chr10	68136327	68138327	-0.612201	-0.391543	-0.0793801	0.355224	E
chr10	75850533	75852533	1.761	1.44904	-0.436244	0.399044	E
chr10	78037459	78039459	-0.130856	-1.31707	-0.524863	0.705772	E
chr10	78258868	78260868	0.383171	-0.521538	-0.682458	0.822329	E
chr10	78365363	78367363	0.187563	1.18586	2.38352	0.00662267	E
chr10	80960175	80962175	-0.557218	-0.714334	0.970618	0.0894751	E
chr10	107528028	107530028	-0.412017	0.644107	0.0758896	0.906152	E
chr10	108567272	108569272	0.730238	1.01054	2.07731	0.118039	E
chr10	108569106	108571106	-0.0199153	1.20688	0.0929446	0.708013	E
chr10	110853939	110855939	-0.662617	0.189072	1.19685	0.00141118	E
chr10	121454174	121456174	0.525192	0.471465	1.42651	0.0377556	E
chr10	4492126	4494126	-1.10664	-0.109549	0.974602	0.532527	E
chr10	4332119	4334119	0.292909	0.547631	0.984357	0.216856	E
chr10	4288975	4290975	0.225446	0.298888	0.096084	0.966432	E
chr10	4142458	4144458	-0.0891465	0.953651	-0.0448926	0.663513	E
chr10	7611164	7613164	-0.75067	-0.132489	-0.697309	0.063614	E
chr10	7611463	7613463	-0.778881	-0.19946	-0.664959	0.0985158	E
chr10	13107165	13109165	-0.293944	0.137972	0.866715	0.814344	E
chr10	19207201	19209201	-0.673023	0.133751	-0.0267292	0.893004	E
chr10	21053518	21055518	-0.129306	0.49014	-0.276175	0.819973	E
chr10	21054276	21056276	-0.0158047	1.08427	0.454939	0.643774	E
chr10	23805273	23807273	-0.447288	0.85712	-0.678425	0.565088	E
chr10	23812305	23814305	-1.17864	-0.532093	-0.281607	0.246795	E
chr10	25313132	25315132	-1.18003	-0.247927	0.741107	0.42285	E
chr10	28087049	28089049	-0.767349	0.473854	-4.25705	0.0474193	E
chr10	39106083	39108083	1.2606	0.852696	1.84902	0.0389951	E
chr10	40362201	40364201	0.406014	0.527891	-0.138914	0.925908	E
chr10	43550607	43552607	-0.963594	0.292756	0.429107	0.235692	E
chr10	51462941	51464941	1.33136	0.216823	0.129084	0.0972093	E
chr10	52277278	52279278	0.24983	0.771993	0.649347	0.927198	E
chr10	58530427	58532427	0.0174293	0.815459	2.20387	3.97557e-13	E
chr10	58531316	58533316	-0.0683837	0.625212	2.02624	3.02541e-10	E
chr10	59906743	59908743	-0.896471	-0.824749	1.3725	0.0095491	E
chr10	64743390	64745390	-0.414337	-1.09344	0.393066	0.689558	E
chr10	68043223	68045223	-3.20435	-1.37694	-0.864587	0.203304	E
chr10	69924977	69926977	-0.771133	-0.229704	0.904927	0.674418	E
chr10	70291401	70293401	1.989	1.87962	2.01302	0.581019	E
chr10	96720444	96722444	1.15535	0.367029	1.89416	0.32052	E
chr10	117952138	117954138	-0.338556	-0.381783	0.233067	0.946733	E
chr10	4248335	4250335	0.372697	0.881065	1.61201	0.000938867	E
chr10	4241428	4243428	0.356308	-0.0582595	1.35092	1.42237e-07	E
chr10	11228610	11230610	0.826521	1.57765	1.12875	0.65839	E
chr10	15262572	15264572	1.62817	1.45363	2.52322	0.0350445	E
chr10	17228386	17230386	-0.163388	0.564403	1.07703	0.767912	E
chr10	17229393	17231393	-0.0526519	0.338708	1.00653	0.824641	E
chr10	28012614	28014614	0.300236	-2.06321	-3.54882	0.044083	E
chr10	31455850	31457850	-0.822832	-0.795913	-0.62513	0.873053	E
chr10	36935110	36937110	0.841189	1.089	0.991171	0.893296	E
chr10	46740221	46742221	-0.595945	1.52975	1.66668	0.263821	E
chr10	49907309	49909309	-0.023702	0.97866	2.33984	0.0340613	E
chr10	60165501	60167501	1.80789	1.79413	3.18524	0.00754197	E
chr10	61058420	61060420	1.45476	-0.443043	-2.94516	0.00130593	E
chr10	62009276	62011276	0.0201186	0.50557	0.937208	0.395318	E
chr10	62011545	62013545	-0.387212	0.770283	0.680239	0.532527	E
chr10	62035995	62037995	0.92593	0.0420123	1.72595	0.152246	E
chr10	63236344	63238344	0.0157676	-0.695316	0.597959	0.571744	E
chr10	66968777	66970777	-0.496392	-0.487635	-0.979216	0.784039	E
chr10	67457927	67459927	-0.305997	-0.679238	1.79904	0.0310855	E
chr10	70324765	70326765	0.367604	-0.746537	1.35877	0.286035	E
chr10	70358927	70360927	0.25682	-0.0814886	0.443697	0.353401	E
chr10	70363816	70365816	-0.07069	-0.168426	-1.33176	0.00790268	E
chr10	71447442	71449442	-0.851561	-0.0275774	-0.0246216	0.9202	E
chr10	71737399	71739399	-2.10348	-0.90097	-3.3682	0.0894751	E
chr10	78095853	78097853	-0.923168	-0.39138	0.931491	0.0327725	E
chr10	84457259	84459259	-0.0946092	-0.783656	-0.571653	0.927198	E
chr10	85070869	85072869	1.33249	0.102317	0.367188	0.326271	E
chr10	93363477	93365477	-1.23927	0.453151	-0.698702	0.662181	E
chr10	95882730	95884730	0.261646	-0.0558503	-1.94207	0.0771086	E
chr10	103345833	103347833	0.747376	0.922632	0.75047	0.674418	E
chr10	106005182	106007182	0.262034	0.374321	3.17187	1.18984e-08	E
chr10	111432631	111434631	0.120317	-0.767416	-1.74939	0.634349	E
chr10	118044085	118046085	-1.68646	-1.24962	-1.2033	0.61916	E
chr10	121500474	121502474	0.324135	1.17931	0.993321	0.565924	E
chr10	125799844	125801844	0.225955	-0.309608	-1.36814	0.737741	E
chr11	4805488	4807488	0.184901	0.150004	-3.66611	0.00672985	E
chr11	5701792	5703792	-0.302951	0.195849	0.220994	0.925908	E
chr11	5942176	5944176	-2.92072	0.261746	0.819946	0.200326	E
chr11	6777875	6779875	1.15914	0.179927	0.138597	0.618147	E
chr11	8604387	8606387	-0.152641	-0.251367	-1.42173	0.498154	E
chr11	8634504	8636504	0.710094	-0.911398	-0.301098	0.122281	E
chr11	11904165	11906165	-0.568979	0.046951	0.608162	0.751748	E
chr11	11940376	11942376	-0.637705	-0.246405	0.745761	0.464825	E
chr11	11941823	11943823	-0.233118	0.453202	1.2223	0.469658	E
chr11	18956571	18958571	-0.162443	-0.493876	-1.41502	0.641707	E
chr11	20058916	20060916	-2.01897	-0.451267	0.201977	0.349293	E
chr11	20137789	20139789	1.1082	0.53665	0.997639	0.847763	E
chr11	22829351	22831351	0.138345	0.398169	-0.893727	0.801644	E
chr11	22948186	22950186	2.21216	0.387132	0.385636	0.285473	E
chr11	26102981	26104981	-1.02284	-2.14409	-2.1669	0.136968	E
chr11	30743334	30745334	-0.32157	0.189872	2.43936	0.0261965	E
chr11	53799125	53801125	0.99764	1.17109	2.12603	0.0354277	E
chr11	60922219	60924219	-0.136626	-0.611411	-1.24333	0.764476	E
chr11	61361006	61363006	-0.603017	-0.155305	-0.283684	0.974585	E
chr11	68393176	68395176	1.77385	0.996646	-0.722377	0.365002	E
chr11	73317833	73319833	-0.0247854	-1.22921	-2.30222	0.359492	E
chr11	76261848	76263848	0.762647	-0.0694378	1.19154	0.764801	E
chr11	76286513	76288513	1.11702	0.530218	1.02147	0.64597	E
chr11	76350488	76352488	-0.207195	1.14477	1.30466	0.090089	E
chr11	78977488	78979488	0.657795	0.71121	0.77676	0.924587	E
chr11	84845916	84847916	-0.190135	0.227572	0.500619	0.87846	E
chr11	88026990	88028990	-0.855739	-0.0641359	-1.07752	0.565071	E
chr11	88582465	88584465	0.244117	0.480534	0.97397	0.536967	E
chr11	88689184	88691184	0.166738	0.528109	-1.30812	0.399675	E
chr11	95703354	95705354	-1.12322	-0.159761	-2.25937	0.450782	E
chr11	95979904	95981904	-0.129851	-0.600599	0.0106286	0.810233	E
chr11	99140762	99142762	-0.634781	1.89794	3.05504	0.0191347	E
chr11	100375137	100377137	-0.0428818	0.329927	0.888941	0.61825	E
chr11	106722032	106724032	-0.123715	-0.215254	-0.647055	0.580232	E
chr11	106723478	106725478	-0.318075	-0.241739	-0.660349	0.702169	E
chr11	107113086	107115086	-0.592543	-0.773728	-1.86651	0.333287	E
chr11	107538245	107540245	0.775069	-0.755184	-1.44727	0.272726	E
chr11	120850778	120852778	0.453971	0.715921	0.489356	0.939711	E
chr11	3292179	3294179	0.0443735	-0.269723	0.782887	0.27798	E
chr11	4245308	4247308	-3.12966	-0.607512	-1.60278	0.182771	E
chr11	4246590	4248590	-1.11516	-1.01193	-1.2064	0.692938	E
chr11	6363836	6365836	-0.158641	0.392971	-0.236244	0.772779	E
chr11	19073314	19075314	-0.674436	0.285315	1.48269	0.0825054	E
chr11	19984512	19986512	-0.67535	-0.0449718	-0.705011	0.878151	E
chr11	19985973	19987973	0.117207	1.30142	0.353807	0.648731	E
chr11	40736570	40738570	-0.227716	-0.429477	-0.828315	0.899318	E
chr11	44745930	44747930	1.16132	0.539639	-0.746035	0.434011	E
chr11	44760566	44762566	-0.253606	0.598237	-1.863	0.282182	E
chr11	46019490	46021490	-1.68737	-1.12856	-3.70544	0.0494357	E
chr11	49658304	49660304	-1.97785	-0.587862	0.803068	0.127492	E
chr11	49805373	49807373	-0.172002	0.391272	-1.2705	0.662221	E
chr11	54139385	54141385	-0.294153	-0.329181	-2.49272	1.76155e-08	E
chr11	62493935	62495935	-0.249263	-0.566408	-0.248586	0.84604	E
chr11	71764383	71766383	1.50478	0.336574	0.437038	0.712158	E
chr11	72285084	72287084	0.762558	-0.267658	-1.78361	0.0428158	E
chr11	77737777	77739777	-0.0268123	-0.410262	-0.212194	0.982725	E
chr11	77933523	77935523	-0.64175	-0.453079	0.783625	0.678929	E
chr11	88169708	88171708	-0.456271	-0.467876	0.352882	0.760164	E
chr11	89099602	89101602	-0.0214449	-1.96697	-3.45165	0.149665	E
chr11	96017010	96019010	0.57204	0.0602999	1.00373	0.372176	E
chr11	97426801	97428801	0.0962145	-1.23552	1.25657	0.0405394	E
chr11	103042113	103044113	0.173359	-0.344515	-0.989391	0.822329	E
chr11	103111661	103113661	-0.0628479	-0.11331	0.966119	0.0148353	E
chr11	112839140	112841140	-1.58666	-1.46663	-0.277299	0.565924	E
chr11	3548204	3550204	1.25197	1.13321	1.29983	0.80572	E
chr11	4301406	4303406	0.572572	0.427051	0.369295	0.895865	E
chr11	6894274	6896274	-0.395683	-0.771558	0.388816	0.00790399	E
chr11	7234263	7236263	-2.65167	0.911065	2.98452	0.00335745	E
chr11	7422679	7424679	-0.51368	-0.0364015	-0.252694	0.903914	E
chr11	8753679	8755679	-0.480436	-0.227385	0.455439	0.859037	E
chr11	11097425	11099425	0.0782454	1.05944	1.50656	0.654409	E
chr11	12810934	12812934	1.69422	0.1052	0.880669	0.57879	E
chr11	16607169	16609169	-0.0114141	0.67616	1.0062	0.737741	E
chr11	19847061	19849061	0.0493059	-0.328887	-0.210484	0.907119	E
chr11	19849013	19851013	0.493484	-0.27266	-0.208944	0.87846	E
chr11	19917190	19919190	0.0400824	0.488541	0.416467	0.890303	E
chr11	20164146	20166146	0.0614687	0.119953	0.81097	0.285473	E
chr11	20465778	20467778	-0.950336	-0.0664901	1.77417	0.014799	E
chr11	28170379	28172379	0.140178	0.163538	1.41242	0.108577	E
chr11	30490917	30492917	-0.691956	0.259651	1.40214	0.154415	E
chr11	32834275	32836275	-1.65664	-0.0120909	0.808325	0.395856	E
chr11	45967717	45969717	0.281691	0.496766	2.26712	0.0426949	E
chr11	50007246	50009246	-0.670588	-0.978997	-4.60014	0.123563	E
chr11	52339297	52341297	-1.1995	-0.391101	1.0352	0.00989806	E
chr11	57552338	57554338	-0.329907	0.327509	1.38209	0.00939621	E
chr11	57956259	57958259	0.604939	0.385944	0.93696	0.891441	E
chr11	63201199	63203199	-1.09992	-0.709429	-1.21917	0.73852	E
chr11	63270224	63272224	-0.488055	-1.43185	-1.93778	0.0404497	E
chr11	63455593	63457593	-1.18343	0.45755	1.04776	0.298954	E
chr11	72370272	72372272	0.562656	1.17398	0.808178	0.822982	E
chr11	76656738	76658738	-0.505417	-1.43154	-3.60754	0.00848878	E
chr11	77672705	77674705	0.259778	-0.308073	-0.0890942	0.925908	E
chr11	77679285	77681285	0.974211	1.47503	-0.284608	0.0436315	E
chr11	79326249	79328249	-0.626446	0.0843942	-0.655856	0.888178	E
chr11	79751705	79753705	0.465402	0.263473	1.02982	0.707187	E
chr11	86834103	86836103	-0.330626	-0.0882788	-0.601484	0.903134	E
chr11	89174257	89176257	-0.0789049	0.117989	1.09532	0.710949	E
chr11	97191217	97193217	0.160708	-0.0406208	0.346288	0.875729	E
chr11	98056936	98058936	0.256085	-0.323414	-0.0823967	0.540699	E
chr11	100533400	100535400	-0.742865	-1.20523	-2.21092	8.98172e-05	E
chr11	101233211	101235211	1.317	2.30014	4.6504	0.00672985	E
chr11	101681189	101683189	0.398936	0.376149	-1.3307	0.528257	E
chr11	101695191	101697191	-0.0471986	0.195111	0.16575	0.941036	E
chr11	107018713	107020713	-0.670322	-1.00298	-5.25224	0.00761976	E
chr11	110780970	110782970	-2.97634	-1.32307	-1.08241	0.182771	E
chr11	114570745	114572745	-0.148736	0.52419	0.305197	0.903723	E
chr11	116424132	116426132	0.179999	-0.162722	-0.62189	0.797861	E
chr11	116426126	116428126	-0.228254	-1.0624	-2.28454	0.044806	E
chr11	116428654	116430654	0.50966	1.08286	1.06429	0.654458	E
chr11	116999331	117001331	0.326175	-0.145757	0.184242	0.908494	E
chr11	117001121	117003121	0.0697893	0.67225	-0.383181	0.818891	E
chr11	117584750	117586750	-0.52127	-0.175834	-0.449601	0.907119	E
chr11	117600337	117602337	-0.0893048	1.25118	-0.602367	0.34984	E
chr11	117628995	117630995	-0.137766	-0.31465	-1.77106	0.20215	E
chr12	4357925	4359925	-0.519811	-0.984726	-2.07649	0.00145707	E
chr12	4556251	4558251	-0.375215	-0.793667	-3.57711	0.000238308	E
chr12	4897217	4899217	0.140446	-0.603737	-0.193856	0.940058	E
chr12	27081709	27083709	-0.425005	-0.0350944	-0.536706	0.944329	E
chr12	27082410	27084410	-0.202269	0.102611	-0.0305861	0.987085	E
chr12	29095144	29097144	-1.00116	0.453041	-0.680216	0.770615	E
chr12	39997149	39999149	0.418472	0.552327	0.355313	0.919178	E
chr12	52394374	52396374	-0.285616	-0.299397	0.35941	0.84126	E
chr12	72733313	72735313	-0.700103	-0.151552	0.390011	0.692938	E
chr12	76214024	76216024	0.430051	0.963225	1.59877	0.0926397	E
chr12	99411749	99413749	-0.690074	0.0651662	-0.0122152	0.611475	E
chr12	101861538	101863538	-2.48833	-0.790528	2.11561	0.000107372	E
chr12	104763026	104765026	-0.076636	0.530497	-0.782561	0.86541	E
chr12	3661870	3663870	-0.188868	-0.105614	0.619523	0.883295	E
chr12	3688588	3690588	-2.10732	-1.6893	-0.662817	0.0408876	E
chr12	3889112	3891112	-0.27368	0.0881076	-0.0603119	0.948709	E
chr12	12874643	12876643	-1.71234	-1.16189	-0.83756	0.611943	E
chr12	12878485	12880485	-1.45173	-0.565442	-0.311879	0.651838	E
chr12	28816584	28818584	-0.842515	0.086002	0.935493	0.398165	E
chr12	35641727	35643727	-2.66773	-1.25544	0.569185	0.0479337	E
chr12	41726724	41728724	-0.564571	-0.421867	-0.77845	0.907119	E
chr12	65114030	65116030	0.0795109	0.426087	1.16691	0.679649	E
chr12	76900769	76902769	0.806139	0.795834	0.357798	0.822329	E
chr12	76918108	76920108	-1.14241	0.134721	0.277713	0.372336	E
chr12	84028233	84030233	-0.00819578	0.593036	1.78135	0.000442677	E
chr12	12176591	12178591	-0.61749	-0.134209	-0.910323	0.360204	E
chr12	12819042	12821042	-0.826141	-0.784459	-1.52407	0.777786	E
chr12	12889129	12891129	-1.45093	-1.30121	-1.21488	0.0984841	E
chr12	17632388	17634388	-0.436885	1.16875	2.70855	6.42825e-06	E
chr12	21461945	21463945	0.537811	0.162994	0.447711	0.847763	E
chr12	25123929	25125929	-1.03601	-0.64842	-1.80764	0.321335	E
chr12	35895934	35897934	0.838532	0.0826214	0.776185	0.769373	E
chr12	39740066	39742066	0.340421	0.432754	-2.95727	0.195457	E
chr12	40994777	40996777	-0.0848449	0.773625	0.30549	0.903723	E
chr12	45832513	45834513	-1.46606	0.860092	-0.788301	0.407748	E
chr12	51857410	51859410	0.24619	0.278211	0.332584	0.939326	E
chr12	54110138	54112138	0.0241165	-0.537263	-0.594323	0.767912	E
chr12	54159364	54161364	-1.79476	-1.75922	-1.62002	0.176256	E
chr12	55472519	55474519	0.291467	1.43909	1.76613	0.506451	E
chr12	59506671	59508671	-0.489837	-0.0541702	-1.04714	0.676475	E
chr12	65427488	65429488	1.23546	1.11187	0.494285	0.766477	E
chr12	65592874	65594874	0.226632	1.01663	1.22468	0.702169	E
chr12	71292996	71294996	0.402137	0.379342	0.308251	0.988486	E
chr12	71296037	71298037	0.561099	1.133	0.15622	0.646719	E
chr12	72052905	72054905	-1.98457	-0.627818	0.228366	0.469658	E
chr12	72686817	72688817	-0.39797	-0.251048	1.04081	0.00923481	E
chr12	72744527	72746527	0.000102046	0.0532101	-0.718011	0.0521655	E
chr12	72853376	72855376	-0.332315	0.561577	-0.187172	0.894617	E
chr12	73085026	73087026	0.0708923	-0.450698	-0.318188	0.540892	E
chr12	74321296	74323296	-0.25488	-0.73612	-0.108851	0.925908	E
chr12	79851032	79853032	-0.533166	-0.33266	1.90565	0.172322	E
chr12	80270411	80272411	0.0134313	0.104979	0.419565	0.813433	E
chr12	80270892	80272892	0.282318	0.343963	0.453716	0.813433	E
chr12	81816002	81818002	0.250733	-0.291446	0.61807	0.61916	E
chr12	84624239	84626239	-0.451692	0.235121	0.0777869	0.611943	E
chr12	86801353	86803353	0.432857	-0.0193737	0.268565	0.610608	E
chr12	86823323	86825323	1.45645	0.911582	-0.0446977	0.00537242	E
chr12	86866636	86868636	0.0332523	-0.245105	0.067477	0.903723	E
chr12	86931206	86933206	-0.079829	0.272652	-1.03009	0.0239659	E
chr12	100533230	100535230	0.00811411	0.749343	0.66018	0.784039	E
chr12	100534436	100536436	0.302976	0.790711	1.33373	0.571744	E
chr12	104432455	104434455	0.464474	0.518745	0.155496	0.925908	E
chr12	105075731	105077731	-0.682087	0.131131	0.175808	0.903914	E
chr12	106174386	106176386	0.230777	0.915977	2.1194	9.53112e-12	E
chr12	106175058	106177058	-0.307996	0.607667	1.96401	2.30429e-05	E
chr12	109947524	109949524	0.326615	-0.443809	0.414273	0.160716	E
chr12	110348902	110350902	-0.803554	-0.821758	-0.955739	0.903134	E
chr13	11933606	11935606	0.0480495	-0.817365	0.284095	0.84126	E
chr13	14054812	14056812	-1.55072	-1.522	-1.75326	0.252407	E
chr13	23594793	23596793	-0.936122	0.0272402	-2.08386	0.232119	E
chr13	34286659	34288659	-0.303193	0.0708557	0.0546423	0.988486	E
chr13	48159417	48161417	-1.27672	-0.293899	0.55938	0.650686	E
chr13	50452709	50454709	0.525531	0.14802	1.0208	0.803206	E
chr13	53183286	53185286	0.101348	0.285649	0.329584	0.890923	E
chr13	62688554	62690554	0.504552	0.442374	1.69074	0.399675	E
chr13	62879094	62881094	-0.477321	-0.842993	-1.94396	0.190073	E
chr13	63527976	63529976	0.31209	0.830496	1.04408	0.822329	E
chr13	63529633	63531633	-1.67601	-0.765763	-0.33074	0.422344	E
chr13	63718736	63720736	-0.286053	0.374975	-0.842966	0.878162	E
chr13	63719743	63721743	-0.693153	0.292323	-0.0468463	0.842897	E
chr13	102914252	102916252	-0.0482057	-1.92303	-1.84461	0.337549	E
chr13	114296848	114298848	-0.997334	-1.55551	-1.57475	0.484826	E
chr13	9308022	9310022	0.825841	0.0483672	-3.53578	0.0189043	E
chr13	20182676	20184676	-0.564536	0.421318	0.453085	0.834384	E
chr13	20384579	20386579	-0.256397	-0.759154	-0.600361	0.853793	E
chr13	21727152	21729152	0.383355	0.340049	-0.3233	0.14881	E
chr13	21789860	21791860	-0.772528	-0.177642	-1.4527	0.477409	E
chr13	34740999	34742999	-0.508035	-0.112668	1.05176	0.696459	E
chr13	35737418	35739418	-0.318131	-0.0200048	0.281594	0.81559	E
chr13	35738670	35740670	-0.339282	-0.315449	0.443468	0.285659	E
chr13	44754669	44756669	1.61622	1.48095	0.188618	0.597711	E
chr13	67843709	67845709	0.298188	0.190634	0.903409	0.571744	E
chr13	97587270	97589270	0.520862	0.489321	-0.0619054	0.782312	E
chr13	97616185	97618185	-0.824684	-0.476108	-3.45695	0.25158	E
chr13	109774278	109776278	0.0165053	0.087672	0.3323	0.978968	E
chr13	109776248	109778248	-1.52612	0.191926	-1.32859	0.182771	E
chr13	109777606	109779606	-1.01011	0.267784	-0.19031	0.398165	E
chr13	112769756	112771756	-0.602898	0.16818	0.114326	0.777433	E
chr13	114025775	114027775	-0.690292	-1.19053	-2.07322	0.374626	E
chr13	114049837	114051837	1.08099	0.0247854	-2.0731	0.104021	E
chr13	11004592	11006592	-0.238938	0.125522	0.708165	0.893296	E
chr13	16768752	16770752	-0.700177	-0.902697	1.28115	0.000541998	E
chr13	16829580	16831580	-0.440787	-0.237925	0.801728	0.0825054	E
chr13	23491265	23493265	0.0176956	0.404433	0.080443	0.903723	E
chr13	24001018	24003018	-0.806618	-0.588686	0.432117	0.714689	E
chr13	25274100	25276100	0.800158	1.16661	2.97628	0.110372	E
chr13	28987859	28989859	-1.34067	0.152169	-0.312514	0.646719	E
chr13	34826341	34828341	-0.57349	-0.0844958	-0.0881057	0.941036	E
chr13	38108291	38110291	-1.07508	0.737236	0.751832	0.434194	E
chr13	43182866	43184866	0.158423	0.520344	0.447827	0.726116	E
chr13	44677440	44679440	-0.334871	-0.119584	-2.10474	2.81433e-05	E
chr13	44704427	44706427	-0.499926	-0.457158	-1.08547	0.0589844	E
chr13	44721422	44723422	0.191989	-0.137005	0.0662349	0.938694	E
chr13	47854776	47856776	-0.287559	-0.535665	-1.41013	0.662272	E
chr13	49012743	49014743	0.222018	0.565077	0.481424	0.261414	E
chr13	51051597	51053597	0.615221	0.619562	0.798267	0.719095	E
chr13	51919969	51921969	0.093936	0.245005	0.371592	0.980609	E
chr13	52555412	52557412	1.00683	-0.615861	-1.65393	0.00249173	E
chr13	52561455	52563455	0.256314	-0.16021	-0.59236	0.606036	E
chr13	54158459	54160459	0.183861	0.62307	0.136334	0.966684	E
chr13	56142414	56144414	0.103082	0.74819	0.986478	0.530308	E
chr13	56257310	56259310	-0.0632481	-2.31638	-1.28255	0.309906	E
chr13	56258448	56260448	0.457647	-0.303625	-0.554145	0.788825	E
chr13	57361804	57363804	0.664101	-0.282461	0.868826	0.887784	E
chr13	58470758	58472758	-0.464017	-0.356517	0.951744	0.0295821	E
chr13	63931515	63933515	-0.142521	0.743561	1.09156	0.782665	E
chr13	67856682	67858682	0.0113837	-0.487426	0.586167	0.870843	E
chr13	91813673	91815673	0.155291	-0.799231	-0.318912	0.903723	E
chr13	94705811	94707811	0.46185	0.243903	-1.4836	0.576385	E
chr13	94857053	94859053	-2.94879	-0.706921	0.660479	0.0900245	E
chr13	97316836	97318836	0.535403	0.417161	-1.75357	0.441347	E
chr13	97319599	97321599	1.10915	0.776856	0.182342	0.422549	E
chr13	101800558	101802558	-0.95149	-0.42224	-0.110127	0.698677	E
chr13	103805689	103807689	0.0665516	0.0579045	0.81648	0.854115	E
chr13	107662911	107664911	-0.421589	0.52308	0.0156164	0.922668	E
chr13	110018262	110020262	-0.748925	-1.55298	-1.27281	0.0826069	E
chr13	112439498	112441498	0.00468457	0.442223	-0.813693	0.282331	E
chr13	113730067	113732067	-0.866459	0.149381	0.780444	0.702169	E
chr13	113735525	113737525	0.644694	0.954361	-0.82366	0.435536	E
chr14	29949797	29951797	0.0790164	0.00633338	-2.18562	0.125454	E
chr14	34359020	34361020	0.293082	-0.0243858	0.413427	0.828569	E
chr14	49446921	49448921	-0.253343	1.36346	0.220605	0.594701	E
chr14	50910386	50912386	1.53882	-0.325152	-2.54692	0.119766	E
chr14	51062991	51064991	-0.383787	-0.886686	-0.682324	0.511403	E
chr14	57731907	57733907	0.405749	-0.946138	0.243292	0.634349	E
chr14	59369621	59371621	-0.260936	-0.237514	-2.01223	0.193102	E
chr14	60981410	60983410	-1.75142	-2.25955	-1.57397	0.446627	E
chr14	67887381	67889381	0.678376	0.509741	-0.87813	0.581019	E
chr14	75366597	75368597	2.19104	2.60187	2.44769	0.469658	E
chr14	122433192	122435192	-1.67287	0.146	-0.386798	0.588483	E
chr14	124032534	124034534	0.348479	0.537066	0.687307	0.382211	E
chr14	7808406	7810406	-1.05041	-0.0116683	0.984979	0.301894	E
chr14	8051097	8053097	-0.910623	0.457382	-0.230444	0.491933	E
chr14	8053926	8055926	-0.315555	-0.384685	-0.951436	0.605645	E
chr14	12106630	12108630	1.7658	1.28733	0.20628	0.374626	E
chr14	12113799	12115799	0.423754	0.305353	0.715929	0.946812	E
chr14	20220222	20222222	0.976928	1.01589	0.441548	0.602402	E
chr14	21087986	21089986	0.356024	0.417627	-0.780251	0.573572	E
chr14	25590216	25592216	-0.234767	0.0493647	-0.129581	0.985364	E
chr14	25603841	25605841	0.485119	0.153452	1.67327	0.471047	E
chr14	27065480	27067480	0.67037	1.6337	2.73777	0.0186808	E
chr14	27271952	27273952	-1.27124	-0.152542	1.13443	0.494653	E
chr14	27346555	27348555	0.811188	1.46341	-0.249417	0.0613489	E
chr14	27347864	27349864	0.660057	0.831524	-0.45733	0.49987	E
chr14	27669093	27671093	-0.947415	-0.302327	-0.441851	0.903914	E
chr14	34773001	34775001	-1.28273	-1.18264	-1.13235	0.241505	E
chr14	50937765	50939765	0.0327591	-0.560711	0.922384	0.031272	E
chr14	52283405	52285405	0.226944	0.640762	1.79926	0.471047	E
chr14	55047298	55049298	-0.207373	0.405051	0.203043	0.884956	E
chr14	55834469	55836469	-0.612108	-0.801732	-2.24348	0.25014	E
chr14	57529261	57531261	-0.668922	-0.422882	-1.87435	0.0846886	E
chr14	62330630	62332630	0.309831	-0.0374591	0.17955	0.880317	E
chr14	77518731	77520731	-0.819668	-0.531188	-1.8409	0.598533	E
chr14	79017801	79019801	-3.77086	-0.411838	0.0450809	0.177226	E
chr14	79582700	79584700	-0.413359	0.0739699	-0.41792	0.867407	E
chr14	99323851	99325851	0.876629	-0.404247	-2.4465	0.19682	E
chr14	115205519	115207519	0.0265094	-0.607707	-1.58749	0.0684616	E
chr14	122254993	122256993	-0.903702	-0.296129	0.287185	0.000499869	E
chr14	122257752	122259752	-0.339541	-0.230148	-1.49435	0.571744	E
chr14	122331277	122333277	-1.01549	0.876008	1.32836	0.318738	E
chr14	122341314	122343314	0.983321	1.15904	0.989999	0.87846	E
chr14	14632014	14634014	0.404183	0.11697	0.180101	0.907059	E
chr14	19860500	19862500	-0.115896	-0.526224	0.596416	0.161052	E
chr14	19989808	19991808	0.574237	0.137291	-0.112518	0.907059	E
chr14	24252935	24254935	-0.221636	1.183	1.71893	0.396777	E
chr14	31899173	31901173	0.266449	0.833638	0.990591	0.800212	E
chr14	53576112	53578112	-0.413245	0.232182	1.85141	1.88262e-07	E
chr14	55357533	55359533	-0.676352	-1.12229	-2.87083	0.365844	E
chr14	61133412	61135412	-0.153985	-1.24622	-0.882528	0.678929	E
chr14	63585340	63587340	-0.520769	-0.584481	0.861883	0.650686	E
chr14	67935777	67937777	-0.400627	-0.432335	-2.86397	0.158069	E
chr14	76266354	76268354	0.0157377	-1.18132	-0.680587	0.782312	E
chr14	89324243	89326243	-0.590311	-0.14318	0.797169	0.445622	E
chr14	99265777	99267777	-0.405008	0.423517	1.57853	0.298954	E
chr14	99509253	99511253	0.0912121	-0.460442	-0.325167	0.956683	E
chr14	100349271	100351271	1.79759	1.4814	1.62272	0.333716	E
chr14	105920109	105922109	0.617558	0.981087	0.477444	0.533889	E
chr14	118750389	118752389	-0.0134045	-0.171334	-0.45015	0.818891	E
chr14	122415406	122417406	-0.560648	-0.445392	1.17488	3.80896e-07	E
chr15	10666444	10668444	-0.721682	0.091694	-0.391281	0.922478	E
chr15	38705326	38707326	0.38703	-0.139408	0.749888	0.57507	E
chr15	38709585	38711585	0.577758	-0.682869	0.670499	0.333287	E
chr15	39779980	39781980	-0.116536	-0.541642	-1.09597	0.434194	E
chr15	39782212	39784212	-1.6806	-1.49227	-2.16417	0.129775	E
chr15	53176041	53178041	-1.58707	-0.533511	-0.0156276	0.56216	E
chr15	59069598	59071598	0.756855	-0.2618	-1.0641	0.0414214	E
chr15	75879709	75881709	-0.168558	-1.15965	0.362801	0.813433	E
chr15	79933830	79935830	0.2647	0.153171	0.333474	0.903914	E
chr15	81729181	81731181	0.0837255	-0.854307	0.589799	0.632801	E
chr15	83247296	83249296	-0.442783	-0.642552	-0.880072	0.838962	E
chr15	93518782	93520782	-0.0680609	-0.42734	1.89472	0.00624675	E
chr15	93520312	93522312	-0.322529	1.04669	1.14503	0.544263	E
chr15	96130963	96132963	-0.220248	1.08722	2.25008	0.00401239	E
chr15	96178576	96180576	0.276444	-0.566453	-0.048726	0.321335	E
chr15	96197200	96199200	-0.269551	-0.123984	0.566857	0.584701	E
chr15	96243948	96245948	-0.60892	0.396128	0.415081	0.505505	E
chr15	96257009	96259009	0.0801105	0.734513	0.353003	0.943035	E
chr15	102242367	102244367	1.59586	0.981801	1.40655	0.0714178	E
chr15	7115328	7117328	0.460462	-0.155482	-0.423399	0.617007	E
chr15	7117275	7119275	-0.83393	0.148015	-1.18565	0.552958	E
chr15	9452015	9454015	0.285265	-0.0603895	-0.0406468	0.973897	E
chr15	10722718	10724718	-0.354542	0.042118	-0.708472	0.648408	E
chr15	10976313	10978313	0.864347	0.772674	1.24613	0.803305	E
chr15	12961336	12963336	-0.154085	-0.273335	0.464974	0.0985158	E
chr15	37010666	37012666	0.0450333	0.0427821	-0.764265	0.870843	E
chr15	39645905	39647905	-0.095951	-0.52217	-0.820449	0.787504	E
chr15	55267191	55269191	-0.197988	0.207186	1.01337	0.365295	E
chr15	56742074	56744074	0.240165	-0.2223	0.499635	0.786926	E
chr15	59293624	59295624	-0.258171	-0.0970066	-0.471488	0.974332	E
chr15	79901603	79903603	0.34102	0.309832	0.460531	0.960786	E
chr15	79904040	79906040	0.383858	0.0472992	-0.580321	0.841093	E
chr15	91863461	91865461	-0.809555	-0.169855	-0.472828	0.631875	E
chr15	98990712	98992712	-0.415347	-0.115921	-0.0355769	0.646719	E
chr15	102925514	102927514	-0.40443	-0.762284	0.909258	0.62624	E
chr15	5134256	5136256	-1.49015	-1.73173	-1.64203	0.000322195	E
chr15	5894895	5896895	-0.0784186	-0.266441	0.582387	0.904209	E
chr15	7081075	7083075	1.98961	2.83715	2.4499	0.339629	E
chr15	19863318	19865318	0.406645	0.0996661	-0.60903	0.862602	E
chr15	30070928	30072928	0.0894686	0.505639	1.33557	0.764801	E
chr15	37081143	37083143	-0.391157	-0.561509	-0.363553	0.817429	E
chr15	41351235	41353235	-1.21082	-1.56739	-1.86489	0.643857	E
chr15	41881643	41883643	-0.712496	-0.335766	-0.92015	0.806129	E
chr15	51999217	52001217	1.55863	0.655542	1.86765	0.57826	E
chr15	52001525	52003525	-0.864485	-0.764763	-0.991482	0.653346	E
chr15	55287696	55289696	-0.284837	-0.472268	-0.638774	0.948709	E
chr15	62008923	62010923	0.896459	1.38258	-1.08394	0.00734029	E
chr15	62009920	62011920	0.629547	1.44587	-1.09682	0.00527654	E
chr15	73675463	73677463	-0.0423218	-0.626885	-0.319612	0.565924	E
chr15	74386777	74388777	-1.21641	-0.726032	0.045363	0.777786	E
chr15	74651921	74653921	0.0530812	0.412096	-0.102012	0.751748	E
chr15	74690590	74692590	0.0779809	0.399886	-0.388655	0.717565	E
chr15	77846968	77848968	-0.50592	-0.510757	0.367711	0.83034	E
chr15	81521447	81523447	-0.332408	-0.332432	0.432374	0.000315194	E
chr15	84664817	84666817	1.51768	1.1806	1.31724	0.285473	E
chr15	90147862	90149862	1.00168	1.6748	-3.24553	0.027688	E
chr15	96721442	96723442	0.836484	2.39148	1.34719	0.0469781	E
chr15	101081313	101083313	-0.585747	-0.659437	0.708243	0.752356	E
chr15	102692052	102694052	-0.877151	0.292844	0.141056	0.822701	E
chr16	4030555	4032555	0.416792	0.708295	2.37403	0.100723	E
chr16	8723086	8725086	-1.12385	-1.87563	-2.91637	0.306066	E
chr16	14123062	14125062	-1.62352	-0.797334	-0.639515	0.718738	E
chr16	16085427	16087427	0.169311	0.167354	-1.96973	0.241505	E
chr16	20381774	20383774	-1.11096	-0.720887	0.435765	0.0998871	E
chr16	22636445	22638445	-0.269842	-0.484462	-1.60773	0.229617	E
chr16	42781011	42783011	0.471113	-2.01458	0.5747	0.0630195	E
chr16	89862434	89864434	-0.847731	0.809697	0.38049	0.708013	E
chr16	93825584	93827584	0.589374	1.48124	0.207426	0.0476573	E
chr16	7074007	7076007	-0.363081	-0.86004	-4.21327	0.0630195	E
chr16	11359427	11361427	0.349811	0.728228	1.74705	0.0710685	E
chr16	13118061	13120061	0.0846026	-0.239404	-0.951192	0.87846	E
chr16	13118965	13120965	-0.102341	-0.156885	-1.50651	0.816899	E
chr16	13748316	13750316	-0.507526	0.199303	-0.239401	0.469658	E
chr16	32510060	32512060	-0.420477	0.856283	0.423978	0.58052	E
chr16	33245831	33247831	0.264021	0.159126	1.26882	0.097096	E
chr16	33843480	33845480	-0.169211	-0.386448	0.0176904	0.983921	E
chr16	33877355	33879355	-0.266571	-0.234149	0.270929	0.966684	E
chr16	35587144	35589144	0.633177	0.257471	-0.516664	0.476864	E
chr16	43606160	43608160	-0.599311	-0.924045	-2.20045	0.624071	E
chr16	48309371	48311371	0.2166	0.995531	0.781722	0.895865	E
chr16	48474316	48476316	-3.2522	-0.241814	-0.00570627	0.302053	E
chr16	48607456	48609456	0.95866	0.780226	-0.888089	0.116594	E
chr16	56115510	56117510	0.145915	-0.729209	0.158995	0.118039	E
chr16	91479611	91481611	-0.216203	0.0682782	0.770349	0.791876	E
chr16	4275765	4277765	-0.642037	-0.821865	-1.40562	0.447872	E
chr16	7796406	7798406	0.991867	0.346267	-0.802479	0.642981	E
chr16	10467027	10469027	1.26016	1.34184	1.09957	0.131426	E
chr16	11259804	11261804	-0.717751	-0.775025	0.283716	0.404787	E
chr16	11294770	11296770	-0.0286482	0.755835	1.79292	1.31743e-06	E
chr16	13749195	13751195	-0.0374476	0.239925	0.00976659	0.788825	E
chr16	13767790	13769790	0.402865	-0.238342	0.184843	0.930219	E
chr16	19864440	19866440	1.09418	1.54672	2.36927	0.30723	E
chr16	20472927	20474927	-0.300225	-0.572954	-0.72635	0.794781	E
chr16	20479231	20481231	-0.675641	0.0949399	1.23629	0.310493	E
chr16	21162700	21164700	-0.70327	-1.22389	-1.31009	0.333287	E
chr16	21701267	21703267	-0.685876	-0.569826	0.171341	0.787504	E
chr16	22184649	22186649	-1.5076	0.678743	2.28266	0.047642	E
chr16	25037905	25039905	-1.03513	-1.29628	-2.01947	0.13227	E
chr16	25516374	25518374	0.199578	0.186607	-0.674576	0.903723	E
chr16	29682497	29684497	-0.174126	0.472135	0.743276	0.277925	E
chr16	29882312	29884312	0.308364	0.290791	0.625557	0.903723	E
chr16	30640589	30642589	0.729436	2.1195	2.78853	0.0329656	E
chr16	30645289	30647289	-0.511124	-0.0139346	1.19535	0.0606929	E
chr16	30938976	30940976	0.434026	0.930075	1.64944	0.312394	E
chr16	42574743	42576743	-0.632804	-1.47452	-1.15737	0.600752	E
chr16	64884706	64886706	0.0115172	-0.636009	-1.64836	0.0126509	E
chr16	88719236	88721236	-2.25894	-0.421987	-0.101447	0.12376	E
chr16	90298859	90300859	-0.64313	0.283938	-0.231679	0.501971	E
chr16	90309074	90311074	0.21849	0.518456	0.301893	0.903723	E
chr16	90521406	90523406	1.75841	0.986541	-0.119561	0.441916	E
chr16	90521537	90523537	1.60439	0.867088	-0.347591	0.399675	E
chr16	91180188	91182188	-0.702199	-0.211016	0.795055	0.377115	E
chr16	95952326	95954326	0.234668	0.0334576	-2.68913	0.100675	E
chr17	10431170	10433170	-0.737509	0.177664	-0.265601	0.903723	E
chr17	10432036	10434036	-0.62778	-0.315725	-0.327344	0.920021	E
chr17	17611570	17613570	0.166015	0.266056	0.662443	0.877762	E
chr17	23694898	23696898	0.188613	-0.565808	0.701999	0.517801	E
chr17	29466783	29468783	0.260417	0.0899575	0.382253	0.312394	E
chr17	29475706	29477706	-0.542616	0.357725	0.304025	0.565872	E
chr17	31263367	31265367	-0.466664	0.641861	2.55447	0.000993481	E
chr17	31264250	31266250	-0.869828	0.0894758	1.50789	0.00219017	E
chr17	31266239	31268239	-0.281175	0.373124	1.27746	0.417784	E
chr17	32295000	32297000	-0.421829	-1.42342	-0.86313	0.142449	E
chr17	32901031	32903031	0.273795	-0.286849	-2.37598	0.0100848	E
chr17	35726973	35728973	0.387128	0.523989	-1.83861	0.277088	E
chr17	40903296	40905296	0.326517	-0.729401	-0.81378	0.572171	E
chr17	56868690	56870690	1.30125	1.04426	0.585936	0.209502	E
chr17	79341943	79343943	-0.818121	0.0544343	-0.160374	0.893803	E
chr17	80254412	80256412	-0.164791	-0.68565	0.352235	0.000752192	E
chr17	84354238	84356238	-0.324979	-1.18878	0.00932809	0.671669	E
chr17	84757584	84759584	0.212399	0.698291	-3.68273	0.0985661	E
chr17	3156212	3158212	-1.27956	-1.15682	-1.73657	0.471775	E
chr17	3504885	3506885	1.83739	2.09786	1.85476	0.353401	E
chr17	10334276	10336276	-0.643357	-0.339823	0.113863	0.780053	E
chr17	11067363	11069363	-0.402754	0.463343	-0.294776	0.895662	E
chr17	15379805	15381805	0.305982	-0.410888	-0.0674159	0.932169	E
chr17	17424286	17426286	-0.10406	-0.557523	-0.905474	0.571744	E
chr17	17738609	17740609	-0.994624	0.850836	0.664157	0.243277	E
chr17	17738857	17740857	-0.699169	0.976821	0.857971	0.313621	E
chr17	17739138	17741138	-0.698125	0.732219	0.766711	0.468236	E
chr17	22744939	22746939	2.16914	3.18948	4.04932	0.0894751	E
chr17	26595675	26597675	1.1319	0.961708	1.12758	0.894617	E
chr17	27040374	27042374	0.181124	1.00433	1.5546	0.352707	E
chr17	29024070	29026070	-0.213692	-0.810436	-0.493948	0.941036	E
chr17	33599123	33601123	-0.12937	-0.139926	-1.04012	0.60712	E
chr17	35939104	35941104	0.455461	-0.267315	0.0445061	0.91443	E
chr17	40494689	40496689	-0.714135	0.145207	-0.918855	0.744989	E
chr17	47570795	47572795	0.790591	0.0892182	-0.700238	0.062774	E
chr17	47709273	47711273	-0.156344	1.49685	1.67613	0.125122	E
chr17	47709943	47711943	-0.0414688	1.39302	1.39551	0.235635	E
chr17	79364019	79366019	-0.482225	0.378089	-0.230607	0.893004	E
chr17	79653372	79655372	-0.735513	-1.26013	-2.10645	0.34805	E
chr17	83476282	83478282	-0.315596	-2.20533	-1.59592	0.44488	E
chr17	83741996	83743996	-0.263684	0.310952	0.838981	0.678929	E
chr17	83749409	83751409	0.197799	0.22256	-1.26472	0.146577	E
chr17	83953608	83955608	1.4655	0.487641	2.87815	0.0606929	E
chr17	85141927	85143927	-0.162407	-0.871917	-2.72173	0.459995	E
chr17	85157866	85159866	-0.524288	-0.262568	-1.51491	0.689558	E
chr17	85162073	85164073	0.082953	-0.685587	-0.826479	0.425087	E
chr17	6834942	6836942	-0.602874	-0.912343	0.828621	0.57034	E
chr17	6859760	6861760	-0.793607	0.121185	-0.315544	0.712721	E
chr17	7532718	7534718	0.653916	0.669716	0.0753086	0.510414	E
chr17	7533649	7535649	0.585254	0.852424	0.618434	0.750038	E
chr17	10077818	10079818	0.479496	0.434863	2.76941	4.55939e-08	E
chr17	10078958	10080958	0.60088	0.345184	2.89425	1.79513e-08	E
chr17	12998046	13000046	0.611971	-0.532057	0.683438	0.103817	E
chr17	12998562	13000562	0.246523	-0.601919	0.631046	0.209767	E
chr17	15206423	15208423	-0.605775	0.281946	0.996863	0.495599	E
chr17	15207262	15209262	-0.928332	0.39026	1.19851	0.133401	E
chr17	27178040	27180040	0.269669	0.00591918	0.829768	0.619682	E
chr17	27237862	27239862	0.169885	0.126054	1.09386	0.656677	E
chr17	27239897	27241897	0.598051	0.146461	1.86325	0.233795	E
chr17	29398361	29400361	0.383129	0.884019	-0.779664	0.0169387	E
chr17	29404653	29406653	-0.534568	-0.180467	-2.55253	0.484994	E
chr17	35811596	35813596	-1.16038	-1.04842	-0.785044	0.173281	E
chr17	37026743	37028743	-0.201101	-0.543863	-0.745346	0.0366126	E
chr17	37989761	37991761	-0.191631	-0.302543	0.268992	0.942624	E
chr17	45606295	45608295	0.14969	0.139659	-1.99567	0.000938867	E
chr17	47975104	47977104	-0.677065	0.478395	1.3982	0.474622	E
chr17	53550681	53552681	-0.669652	-1.54275	-3.80132	0.125122	E
chr17	53560912	53562912	-0.411915	-0.486666	-0.84507	0.372176	E
chr17	63532298	63534298	-1.08672	-0.432504	-1.64478	0.777786	E
chr17	66284347	66286347	0.31847	1.07501	1.02903	0.751748	E
chr17	79745307	79747307	-0.00662391	-0.89298	-0.685568	0.581019	E
chr17	80496452	80498452	-0.215683	-0.796366	-0.767246	0.540892	E
chr17	83165732	83167732	2.29394	2.90625	4.05908	0.00785726	E
chr17	83567321	83569321	0.0760281	-0.680709	-0.831693	0.792413	E
chr17	83664009	83666009	-0.260034	-0.395778	0.23591	0.142778	E
chr17	83697928	83699928	0.236317	0.328921	0.455936	0.922668	E
chr17	86147757	86149757	-0.487998	-0.330548	-2.4917	0.000168366	E
chr17	87470853	87472853	0.442399	-0.0940606	1.46582	0.0095491	E
chr17	87530613	87532613	-0.28676	-1.45533	0.891663	0.00412503	E
chr17	87557650	87559650	-1.05111	-0.516876	0.17767	0.764801	E
chr17	88255553	88257553	-0.398582	-0.203543	0.752328	0.222592	E
chr17	88346113	88348113	0.387544	0.413644	2.15848	0.276016	E
chr17	88403760	88405760	-0.935156	-0.861159	-1.30005	0.513492	E
chr17	88510205	88512205	0.327269	0.325193	0.476118	0.938044	E
chr17	93481485	93483485	0.759255	0.960716	-0.583024	0.782312	E
chr18	12019863	12021863	-0.0029901	-1.00916	-0.970405	0.196974	E
chr18	14675757	14677757	0.281885	-0.27307	-1.05664	0.8331	E
chr18	33835012	33837012	-0.379041	0.380718	-1.18428	0.132567	E
chr18	33889719	33891719	-0.0197783	0.257572	-0.0639817	0.895969	E
chr18	35675164	35677164	0.183428	0.328	0.420362	0.951359	E
chr18	35822100	35824100	1.01291	0.590685	2.09875	0.0386289	E
chr18	36414877	36416877	-0.0785299	-0.683887	0.165521	0.758582	E
chr18	36419959	36421959	-0.45013	-1.29367	0.21998	0.541571	E
chr18	65923786	65925786	-0.366498	-0.237425	0.836966	0.828569	E
chr18	67496888	67498888	0.0141606	0.317248	0.755877	0.817592	E
chr18	77037182	77039182	0.0860251	-0.104612	0.106813	0.925908	E
chr18	77560118	77562118	0.32653	-0.249861	-0.87131	0.577993	E
chr18	77756584	77758584	-0.695443	0.0728745	-0.261962	0.892007	E
chr18	80183789	80185789	0.133657	-0.477304	-2.09927	0.359452	E
chr18	80185065	80187065	-0.0426331	-0.562103	-2.27159	0.0195302	E
chr18	4403201	4405201	-2.95667	-0.994682	-0.0743735	0.216948	E
chr18	5010779	5012779	-0.202812	0.780977	-1.01819	0.521438	E
chr18	10460413	10462413	3.01109	3.21228	4.75629	0.0062914	E
chr18	21007414	21009414	-0.0734903	0.876787	-1.13611	0.542585	E
chr18	34550963	34552963	0.356694	1.03841	-0.0853548	0.835356	E
chr18	37770745	37772745	0.636212	1.19549	2.24448	0.118501	E
chr18	38960164	38962164	-1.00933	0.231158	0.494345	0.500409	E
chr18	46913667	46915667	0.518874	-0.822965	-2.62551	1.20189e-09	E
chr18	75209441	75211441	-0.396401	-1.90391	-0.186256	0.202819	E
chr18	75233002	75235002	-1.04172	-1.37589	-1.4609	0.710949	E
chr18	75900764	75902764	-2.02144	1.03923	-2.77482	0.142449	E
chr18	5422121	5424121	0.452277	0.700429	0.0532592	0.928689	E
chr18	9532372	9534372	0.0452765	-0.370487	-1.21652	0.777786	E
chr18	10048641	10050641	-0.428676	0.500946	2.72724	0.00284397	E
chr18	12238774	12240774	0.0296433	-0.633083	-1.9327	0.238238	E
chr18	24374589	24376589	-0.00977989	-0.576112	-0.746666	0.76323	E
chr18	24393372	24395372	0.322873	-1.02836	1.06195	0.372176	E
chr18	28469655	28471655	-1.5962	0.587833	-1.3302	0.468236	E
chr18	30120792	30122792	-0.429262	-0.667377	-1.70562	0.0902857	E
chr18	30508291	30510291	1.13291	-0.274853	-0.234436	0.58382	E
chr18	30697226	30699226	-1.17576	-0.503158	-2.91727	0.0825054	E
chr18	34131552	34133552	-1.28343	0.270264	2.35484	0.0414978	E
chr18	35069990	35071990	-0.350776	-0.368534	0.00561019	0.961888	E
chr18	35756805	35758805	-0.781322	-1.01217	-1.51572	0.666172	E
chr18	38081009	38083009	-0.291779	0.114447	0.670705	0.847763	E
chr18	38144043	38146043	-0.236161	0.98172	0.193283	0.542585	E
chr18	38147884	38149884	-0.657333	0.943843	0.903547	0.0725248	E
chr18	38173910	38175910	0.283626	0.852053	1.71712	0.0154484	E
chr18	38572857	38574857	1.43031	1.30097	-1.16099	5.1613e-06	E
chr18	47474470	47476470	-0.818312	0.213902	1.02723	0.448413	E
chr18	47492068	47494068	-0.0597698	0.328675	0.0788522	0.903723	E
chr18	47495039	47497039	-0.294598	0.338134	0.916235	0.104064	E
chr18	54827273	54829273	0.385148	0.0476816	1.48023	0.228409	E
chr18	56665657	56667657	-0.906855	-1.05331	-2.75103	0.0902654	E
chr18	59975815	59977815	-0.388444	-0.292797	1.17109	0.646719	E
chr18	60752322	60754322	-1.0025	0.341861	0.258941	0.349781	E
chr18	60766194	60768194	0.400238	0.316175	1.09988	0.0894751	E
chr18	64013132	64015132	-0.203933	0.246073	-0.117017	0.975627	E
chr18	65832338	65834338	-1.30043	0.0676948	-3.36054	0.207791	E
chr18	66426463	66428463	0.306141	0.647123	0.495471	0.944416	E
chr18	66428340	66430340	0.377171	0.593983	0.565365	0.845779	E
chr18	76555439	76557439	0.569893	1.14158	0.647757	0.767912	E
chr18	76594455	76596455	0.937793	1.54074	1.47764	0.643857	E
chr18	76595347	76597347	0.823845	1.09749	0.951003	0.882627	E
chr18	81251047	81253047	-0.295673	-1.71025	-3.85687	0.000938867	E
chr18	82776828	82778828	0.119016	1.42651	0.0533866	0.559142	E
chr18	82811102	82813102	-0.621658	-0.51796	0.501111	0.577993	E
chr18	85502637	85504637	-0.637862	-0.691659	-1.52283	0.184234	E
chr19	3839508	3841508	-0.253321	-0.00839984	-0.372492	0.954937	E
chr19	3841655	3843655	-0.78319	-0.072968	0.707821	0.044083	E
chr19	10231198	10233198	0.201265	0.98944	0.201393	0.571744	E
chr19	11822627	11824627	0.546972	1.65027	1.87137	0.0985158	E
chr19	18607234	18609234	-0.703375	0.0225666	1.17385	0.471775	E
chr19	20923206	20925206	0.0349409	1.27162	-0.339802	0.540892	E
chr19	29350091	29352091	-2.55733	0.0833123	0.0895948	0.393018	E
chr19	32239799	32241799	-0.0841905	-0.0196678	1.16107	0.0475554	E
chr19	32254691	32256691	-0.465913	-0.934713	-0.235585	0.393018	E
chr19	38048707	38050707	-0.346649	0.746413	-0.376794	0.717565	E
chr19	40935220	40937220	0.20056	0.455447	1.11513	0.179759	E
chr19	47327141	47329141	0.456397	0.0216616	0.189424	0.946812	E
chr19	47329902	47331902	-0.488379	-0.0107345	-0.673684	0.847763	E
chr19	47449913	47451913	-0.17588	-0.108754	-0.133555	0.998234	E
chr19	4849043	4851043	-1.851	-0.725362	-1.92534	0.260882	E
chr19	5805701	5807701	0.517625	-0.344505	-0.228145	0.0698101	E
chr19	7582590	7584590	-0.404381	0.116548	-0.265856	0.924587	E
chr19	8691833	8693833	-0.766048	-0.131197	-0.117585	0.760823	E
chr19	14662881	14664881	0.210263	0.128313	-1.11551	0.53	E
chr19	16490819	16492819	0.66957	0.421984	-1.78347	0.372336	E
chr19	17137261	17139261	0.0362817	-0.110198	-1.30689	0.730727	E
chr19	23152789	23154789	0.393971	-1.16673	-2.49963	0.309467	E
chr19	23947342	23949342	-1.63895	-0.400871	0.945573	0.196149	E
chr19	29007397	29009397	-0.906648	0.297426	-0.734824	0.13245	E
chr19	29284745	29286745	1.63177	2.04799	1.87329	0.64984	E
chr19	38319939	38321939	-0.279695	0.249472	0.750316	0.00444954	E
chr19	46496397	46498397	-1.25982	0.435121	1.49113	0.243277	E
chr19	53091444	53093444	-1.48563	0.991873	3.27517	0.0020357	E
chr19	53696941	53698941	0.335538	-0.579125	0.62901	0.552856	E
chr19	55555286	55557286	0.144258	0.162972	0.488099	0.966684	E
chr19	6865149	6867149	-0.704165	0.276174	0.368122	0.802392	E
chr19	10347149	10349149	-0.110261	-0.994332	-0.727975	0.907059	E
chr19	12730217	12732217	0.27918	-0.455131	0.987582	0.387829	E
chr19	12730708	12732708	0.375083	-0.135673	1.132	0.399675	E
chr19	12731111	12733111	-0.0460023	-0.0372814	1.02214	0.520829	E
chr19	14669954	14671954	0.620058	0.715805	-1.42434	0.10925	E
chr19	14676140	14678140	-0.13323	-0.120292	-2.41461	0.000258629	E
chr19	14679019	14681019	0.0162949	0.123665	-3.65379	4.72586e-07	E
chr19	14834732	14836732	-0.324221	0.324229	-1.27825	0.129645	E
chr19	21712010	21714010	0.644594	-0.803699	-0.645209	0.581019	E
chr19	26876296	26878296	-0.0478505	-0.187864	-1.94047	0.69602	E
chr19	29065944	29067944	-0.826764	-0.25532	1.08325	0.020522	E
chr19	30184567	30186567	-0.521445	-0.313644	0.213798	0.334535	E
chr19	32723015	32725015	0.0403864	0.564424	-1.10575	0.0847362	E
chr19	32725963	32727963	-0.312075	0.241806	-2.37198	1.93397e-09	E
chr19	32955467	32957467	0.773135	0.346626	0.0952192	0.504839	E
chr19	37487557	37489557	-1.41546	-3.05881	0.00880376	0.0725185	E
chr19	37876950	37878950	-0.284322	0.284056	0.535103	0.900737	E
chr19	41012824	41014824	0.142588	0.504647	0.105582	0.966353	E
chr19	41475854	41477854	-0.420118	-0.380951	-1.74195	0.572171	E
chr19	42135163	42137163	0.270849	-0.0855071	0.279286	0.471202	E
chr19	44265155	44267155	0.329486	0.543907	0.809548	0.282331	E
chr19	44279435	44281435	0.417312	0.402353	0.537027	0.42399	E
chr19	44279995	44281995	0.377023	0.591914	0.542397	0.264674	E
chr19	53051343	53053343	0.393594	-0.110614	1.63089	0.0283541	E
chr19	53057678	53059678	-0.0728658	-0.169409	0.734072	0.585234	E
chr19	53283767	53285767	-0.65428	-0.851998	-0.816134	0.768528	E
chr19	55711938	55713938	0.500736	1.05001	0.0976241	0.722382	E
chr19	56665287	56667287	0.517381	-0.466038	0.842542	0.656677	E
chr19	57576035	57578035	-3.09193	0.208468	-0.105844	0.310091	E
chr2	10333493	10335493	-0.629699	-0.205096	-1.08535	0.833526	E
chr2	13369821	13371821	0.0206615	0.67851	-0.883509	0.0710685	E
chr2	23001839	23003839	-0.00385432	-0.07958	-0.953025	0.905923	E
chr2	34936560	34938560	0.387937	-0.337873	-0.0470778	0.758582	E
chr2	60196051	60198051	-0.772311	-0.996788	-0.951832	0.471775	E
chr2	70805164	70807164	0.00131089	0.381393	0.158256	0.942624	E
chr2	75682060	75684060	0.170709	0.224677	0.180305	0.987542	E
chr2	76804409	76806409	-0.0139968	0.621339	-1.66889	0.370239	E
chr2	77146060	77148060	0.156666	0.0539115	-1.69122	0.65129	E
chr2	84518091	84520091	-0.251757	-2.01965	0.172378	0.435966	E
chr2	91705737	91707737	-2.02521	-1.91938	-2.62112	0.204862	E
chr2	106464905	106466905	0.365295	0.938704	-2.88361	0.108415	E
chr2	114177403	114179403	-1.0056	-1.05017	-0.60377	0.772779	E
chr2	116059211	116061211	-0.467286	-0.858744	-2.89857	0.00655745	E
chr2	118178755	118180755	0.240342	0.448183	1.56577	0.0684616	E
chr2	119462706	119464706	-0.658483	-1.25564	-2.20835	0.0405394	E
chr2	128264550	128266550	-1.04272	-0.122508	1.49178	0.000442677	E
chr2	129060899	129062899	-0.17107	0.447708	-1.28632	0.716466	E
chr2	135558463	135560463	-2.22963	-2.05892	-1.25051	0.409835	E
chr2	135559308	135561308	-2.47863	-1.45997	-1.54608	0.216948	E
chr2	137097547	137099547	-2.23279	0.00957946	1.70274	0.015094	E
chr2	144156259	144158259	1.74574	2.25529	4.61093	0.0130814	E
chr2	146299251	146301251	0.249055	0.0350369	-0.654738	0.804643	E
chr2	153640927	153642927	-0.764416	-0.171304	-0.922475	0.570179	E
chr2	153642177	153644177	-0.279489	0.516941	-0.688016	0.34963	E
chr2	154337210	154339210	0.292663	-0.809165	-1.80654	0.109367	E
chr2	165807391	165809391	0.0882938	-0.835256	0.391153	0.34805	E
chr2	165809135	165811135	0.212351	-0.00434148	0.239443	0.571744	E
chr2	165873924	165875924	0.215715	-0.590797	0.150618	0.895969	E
chr2	165893627	165895627	-1.61479	-2.42814	-0.439792	0.287813	E
chr2	165980668	165982668	1.01977	1.09801	-0.856359	0.279872	E
chr2	167529245	167531245	0.728164	0.216732	1.48905	0.372586	E
chr2	174260604	174262604	-0.133913	-0.0302275	-2.10237	0.108415	E
chr2	19391776	19393776	-0.990096	-0.90209	-1.89729	0.61916	E
chr2	20495555	20497555	2.63319	2.32532	6.52234	2.31708e-15	E
chr2	20548253	20550253	-0.675394	-0.0276957	-2.90809	0.131547	E
chr2	20593386	20595386	0.0246413	-0.656238	-0.115376	0.886107	E
chr2	20594216	20596216	-0.818381	-0.602037	-0.947337	0.722743	E
chr2	20721896	20723896	0.635983	1.26241	0.335447	0.610833	E
chr2	29074917	29076917	0.785868	0.57987	-2.98395	0.106166	E
chr2	29096947	29098947	0.774922	0.587738	-0.368838	0.808535	E
chr2	29628518	29630518	-0.513871	0.302845	0.218056	0.712721	E
chr2	29630697	29632697	0.630988	0.399055	-0.838111	0.820342	E
chr2	29690854	29692854	-0.587928	0.203953	0.571228	0.854115	E
chr2	29972717	29974717	-0.512149	-1.20462	-1.93121	0.287813	E
chr2	30060996	30062996	-0.756092	-0.430054	-0.0319507	0.581019	E
chr2	31162776	31164776	-0.679505	-0.808996	-1.55903	0.00335745	E
chr2	31164537	31166537	0.712256	-0.34251	-0.56257	0.651838	E
chr2	58625185	58627185	-0.114115	0.317131	0.513801	0.873053	E
chr2	58627288	58629288	0.445243	0.0901436	-1.23783	0.620986	E
chr2	59633096	59635096	0.395432	1.17601	0.366733	0.611943	E
chr2	69047130	69049130	-0.898498	-0.450402	-1.10032	0.213073	E
chr2	71865698	71867698	0.301017	0.902728	0.749165	0.177226	E
chr2	92143185	92145185	0.209379	1.56797	0.174267	0.639613	E
chr2	115722864	115724864	-0.191919	-0.199468	-0.55251	0.939046	E
chr2	121894397	121896397	-1.10772	-0.0323923	1.19668	0.175216	E
chr2	146061707	146063707	-0.631899	-0.166967	0.0283699	0.905923	E
chr2	149981524	149983524	-0.52467	-1.29405	-1.00257	0.714689	E
chr2	154465132	154467132	-1.33256	0.674875	-0.292184	0.10764	E
chr2	155221531	155223531	0.525119	-0.443903	-0.0719342	0.901137	E
chr2	156424788	156426788	0.522504	0.670312	0.983326	0.806653	E
chr2	157375597	157377597	0.387873	0.266528	1.15719	0.151695	E
chr2	157839884	157841884	-1.89121	-0.77094	0.0770253	0.595009	E
chr2	160655414	160657414	-0.606458	-0.368551	-1.0944	0.0527298	E
chr2	167071477	167073477	0.469237	0.596405	1.58574	0.174326	E
chr2	170771416	170773416	-1.0246	1.76472	1.80054	0.247278	E
chr2	170774877	170776877	-0.300279	1.11413	1.95023	0.43324	E
chr2	173283930	173285930	0.159406	0.226655	-0.126671	0.985364	E
chr2	179568302	179570302	0.747404	0.937118	-0.11266	0.692938	E
chr2	180739637	180741637	-1.72641	0.118242	1.05859	0.264154	E
chr2	5075076	5077076	0.622567	1.25174	-1.10709	0.044083	E
chr2	5077195	5079195	0.706653	1.27775	-0.929497	0.00785726	E
chr2	8497718	8499718	0.396513	0.329537	-0.691583	0.805728	E
chr2	17932366	17934366	-0.265253	-0.675142	-3.7161	0.0319167	E
chr2	17942320	17944320	0.346368	0.106869	-0.881567	0.751748	E
chr2	21963153	21965153	-1.02618	0.533297	2.69096	0.0419962	E
chr2	26298006	26300006	-1.35885	-1.49043	-1.96752	0.312412	E
chr2	30759320	30761320	-0.606818	-0.447318	1.90818	0.000938867	E
chr2	30778346	30780346	0.600722	0.564265	1.58604	0.390529	E
chr2	32859959	32861959	-0.347853	-0.583538	-1.74819	0.0631886	E
chr2	33477623	33479623	-0.437879	-1.11791	-2.79877	0.090089	E
chr2	34398730	34400730	0.012069	-0.381679	-1.43707	0.212499	E
chr2	43364971	43366971	2.01037	1.03021	0.104246	0.372336	E
chr2	44524447	44526447	0.21616	0.254215	0.400861	0.957764	E
chr2	44537410	44539410	-2.19867	-1.22885	-1.77056	0.112328	E
chr2	49363563	49365563	-0.279647	-0.230704	-0.663932	0.820342	E
chr2	50264466	50266466	-0.120421	-0.653835	0.00622545	0.662221	E
chr2	51048687	51050687	0.371101	0.191294	-0.338355	0.824348	E
chr2	61245899	61247899	0.674376	-0.290711	0.976859	0.663233	E
chr2	61402237	61404237	-0.155209	0.0857749	0.525387	0.824348	E
chr2	71624376	71626376	-1.49238	0.202767	0.847831	0.558313	E
chr2	73020064	73022064	0.360919	0.492437	0.746892	0.918382	E
chr2	73040819	73042819	-0.980127	-0.192604	0.553126	0.459266	E
chr2	75959541	75961541	-0.251921	0.500184	-0.410846	0.828569	E
chr2	81847904	81849904	-0.624748	0.387549	-1.15259	0.558313	E
chr2	83709598	83711598	-1.43193	-1.26394	-1.06815	0.782312	E
chr2	84584933	84586933	-0.593981	0.109763	0.679438	0.304346	E
chr2	93926978	93928978	-0.263639	-0.31761	-1.60327	0.056722	E
chr2	104854967	104856967	0.527902	-0.184659	-1.00405	0.126312	E
chr2	106676704	106678704	-0.23777	-0.654221	0.885901	0.441347	E
chr2	112431438	112433438	-1.03695	-1.12647	-0.518037	0.797861	E
chr2	117018105	117020105	0.692049	1.08805	-0.281101	0.643864	E
chr2	118586796	118588796	-0.421072	-0.327896	-0.79349	0.870843	E
chr2	118587354	118589354	-0.678762	-0.587015	-1.05307	0.824641	E
chr2	119854817	119856817	-0.550598	-0.465418	-0.539652	0.818891	E
chr2	119856661	119858661	-0.344347	-0.568771	-0.796953	0.241505	E
chr2	121476581	121478581	-0.0474916	-0.626782	-1.02337	0.61942	E
chr2	129880890	129882890	0.502115	-0.100784	-0.426725	0.907059	E
chr2	131095169	131097169	1.65122	0.800257	1.26296	0.674102	E
chr2	131764782	131766782	-0.106659	0.277529	-1.05287	0.797861	E
chr2	140076883	140078883	-0.385569	0.428697	-0.453412	0.532016	E
chr2	144417316	144419316	0.988939	-0.334111	0.825447	0.400402	E
chr2	146630381	146632381	-0.24844	-0.398722	0.702887	0.632049	E
chr2	152028618	152030618	1.65399	0.694412	1.30077	0.653086	E
chr2	153583614	153585614	-1.00215	-0.609291	-1.36509	0.712721	E
chr2	157485813	157487813	0.540293	0.129393	2.09951	0.0614026	E
chr2	158152019	158154019	1.1371	-0.31055	1.73764	0.0352625	E
chr2	158153440	158155440	0.0942416	-0.205258	1.28477	0.0428158	E
chr2	166417532	166419532	-0.157692	-0.563212	-2.33058	0.0542423	E
chr2	167247058	167249058	-1.02631	-0.444248	0.381047	0.744989	E
chr2	168124327	168126327	-0.660694	-0.831578	0.433257	5.78161e-08	E
chr2	168837989	168839989	-0.37193	-0.503551	-0.624724	0.875729	E
chr2	168840739	168842739	0.15901	0.686711	0.217278	0.752713	E
chr2	168958560	168960560	0.409783	0.198987	0.420469	0.544263	E
chr2	169288106	169290106	0.885401	-0.654	-2.34507	0.000315194	E
chr2	170244856	170246856	-0.0638977	0.130803	0.175006	0.985364	E
chr2	171284992	171286992	0.506553	0.127035	3.00766	6.32661e-07	E
chr2	171878343	171880343	-0.386715	0.853537	0.438873	0.84126	E
chr2	172515789	172517789	1.47699	0.455743	-2.02963	0.0972093	E
chr2	172576428	172578428	0.101473	-0.306099	-1.06484	0.215784	E
chr2	172618149	172620149	0.128502	-0.756527	-0.395613	0.772779	E
chr2	174232640	174234640	-1.68576	-0.322565	-3.44958	0.245611	E
chr2	181917815	181919815	-0.311434	-0.708878	-1.67612	0.00155255	E
chr3	57470304	57472304	-0.4246	-0.757832	-2.86566	0.194992	E
chr3	84190639	84192639	0.689697	0.930421	0.902218	0.764801	E
chr3	84193096	84195096	1.39433	1.53388	2.01077	0.503628	E
chr3	86844366	86846366	-0.288166	0.787625	1.6495	0.136776	E
chr3	90445569	90447569	0.4616	0.542019	0.996936	0.648408	E
chr3	97254021	97256021	0.165516	0.271897	0.0405613	0.988486	E
chr3	121418362	121420362	0.589412	1.05057	2.04525	0.335732	E
chr3	127452416	127454416	-0.879418	-1.20718	-1.63731	0.000588671	E
chr3	127463000	127465000	-0.998331	-0.716849	-1.42832	0.0739861	E
chr3	131101321	131103321	-0.813184	0.46442	-1.17744	0.426074	E
chr3	157920593	157922593	-0.35816	0.0781608	-0.733291	0.926541	E
chr3	22120982	22122982	0.423296	0.672478	1.03561	0.841093	E
chr3	22155526	22157526	-1.72462	0.113344	1.18926	0.000668597	E
chr3	31016818	31018818	-0.672455	1.06642	0.378939	0.287813	E
chr3	32758135	32760135	-0.572347	-0.0908987	0.23894	0.874515	E
chr3	34667600	34669600	0.0637633	0.490122	-0.481816	0.764801	E
chr3	63294280	63296280	0.266155	-0.361646	1.58495	0.000258629	E
chr3	65974438	65976438	1.73929	0.911097	2.01367	0.175972	E
chr3	68487369	68489369	0.152353	0.0495649	1.55273	1.76155e-08	E
chr3	68491812	68493812	0.132456	-0.455156	0.495831	3.80896e-07	E
chr3	81101520	81103520	0.464292	0.738936	-0.526342	0.85098	E
chr3	103126442	103128442	0.0219937	0.328128	-0.373727	0.840164	E
chr3	103144520	103146520	0.968249	0.88521	0.0836861	0.653086	E
chr3	103145449	103147449	1.23644	1.06145	0.870316	0.666172	E
chr3	119094513	119096513	-0.193927	-1.36239	-2.14233	0.203139	E
chr3	129572820	129574820	0.245147	-0.43434	-1.10751	0.782098	E
chr3	157320677	157322677	-0.235423	-0.592119	-0.852893	0.847763	E
chr3	157931054	157933054	-0.782759	0.24612	-0.425313	0.87846	E
chr3	7165682	7167682	-1.01447	-1.44159	-0.335029	0.765079	E
chr3	8004802	8006802	-0.301802	-0.16539	1.26679	2.15637e-05	E
chr3	9007817	9009817	0.233524	-0.609892	1.3465	0.283685	E
chr3	11210481	11212481	-0.759734	-0.711289	0.532028	0.0524011	E
chr3	11211649	11213649	-0.858243	-0.494032	0.805266	0.0046153	E
chr3	12327650	12329650	-0.743034	-0.544148	0.194992	0.88231	E
chr3	18694621	18696621	-1.33987	-0.117588	2.57732	0.00353322	E
chr3	21891276	21893276	-0.764416	-0.25455	-0.232897	0.939711	E
chr3	21934935	21936935	-0.142789	0.231473	1.1794	0.0021773	E
chr3	22037193	22039193	-0.999489	-0.971228	-0.966289	0.822329	E
chr3	27062529	27064529	0.402664	0.232515	0.284155	0.941036	E
chr3	27063137	27065137	0.226651	0.0897981	0.130586	0.985364	E
chr3	30723452	30725452	-0.739644	0.126748	-0.0810494	0.93184	E
chr3	31088475	31090475	0.0386439	0.485425	0.669206	0.510414	E
chr3	32762215	32764215	0.528854	-0.0528938	0.599585	0.696623	E
chr3	33989741	33991741	-0.0313506	-0.194341	-0.943007	0.662221	E
chr3	35720942	35722942	0.378057	0.000341758	-1.19091	0.00266513	E
chr3	35722862	35724862	0.744962	0.750382	-0.157685	0.0729741	E
chr3	35724404	35726404	0.696889	0.794693	-0.789546	0.353965	E
chr3	39978083	39980083	-0.275118	0.0836992	-1.61129	0.646719	E
chr3	41098850	41100850	-2.09672	-0.227505	-0.391617	0.318926	E
chr3	41407871	41409871	-1.71202	0.383819	3.13432	3.1349e-06	E
chr3	52253292	52255292	-0.097612	-0.710435	-2.49087	0.318926	E
chr3	52399936	52401936	0.811453	0.62631	1.68832	0.236284	E
chr3	52412413	52414413	-0.318138	-0.537499	0.388101	0.877762	E
chr3	54989184	54991184	0.344094	-0.312245	1.88396	0.103817	E
chr3	79038874	79040874	0.936819	1.17209	0.323422	0.730727	E
chr3	79320921	79322921	-1.05314	-1.46962	-1.46314	0.697059	E
chr3	83585367	83587367	-0.99898	-0.594295	-1.21037	0.741795	E
chr3	87192915	87194915	0.154861	-0.00350186	-1.31126	0.0195701	E
chr3	87193838	87195838	-0.239019	-0.45673	-1.53382	0.0419962	E
chr3	95369246	95371246	0.368301	-0.219569	0.941792	0.61916	E
chr3	95701199	95703199	-0.407661	-0.0430955	0.768509	0.020522	E
chr3	97536212	97538212	-1.32762	0.311077	-0.243333	0.577993	E
chr3	97539475	97541475	-0.548309	-1.05789	-0.864633	0.822329	E
chr3	101162523	101164523	-0.145365	0.811673	0.845589	0.172147	E
chr3	101714199	101716199	0.830581	0.459935	-2.75292	0.178486	E
chr3	103378613	103380613	0.193324	0.954331	2.25308	0.0681851	E
chr3	116722214	116724214	-0.477989	-0.289695	-0.615391	0.873053	E
chr3	121386688	121388688	0.18255	0.294413	-0.0822881	0.984645	E
chr3	121576259	121578259	-0.379868	-0.799201	-1.03916	4.19157e-05	E
chr3	121578080	121580080	0.100117	-0.469768	-0.79916	0.00366803	E
chr3	131083905	131085905	-0.481761	0.00819066	-0.601118	0.674418	E
chr3	137832421	137834421	1.39444	0.346427	1.31892	0.22545	E
chr3	144412087	144414087	0.742028	1.59041	0.00083021	0.140671	E
chr4	45489293	45491293	-0.021194	-0.0337275	1.47694	0.0469781	E
chr4	46185158	46187158	-0.312007	-0.789187	-0.294141	0.941036	E
chr4	46664642	46666642	-0.564668	-0.156324	1.04084	0.182771	E
chr4	55133967	55135967	0.235862	-1.61291	-1.65033	0.00147677	E
chr4	55208114	55210114	-2.42266	-1.96431	-1.38926	0.43982	E
chr4	57278469	57280469	0.198716	0.556532	-1.90378	0.0884519	E
chr4	76013446	76015446	0.820396	1.59984	0.475027	0.674789	E
chr4	82400648	82402648	0.439321	0.517906	1.02287	0.760823	E
chr4	108362181	108364181	0.164302	0.926632	2.09848	0.0392906	E
chr4	109072436	109074436	0.688869	1.09162	0.835027	0.918456	E
chr4	110311334	110313334	0.0954103	-0.0422426	-0.762572	0.800488	E
chr4	117372835	117374835	0.929895	0.306847	-0.465776	0.272952	E
chr4	117379121	117381121	0.252277	-0.66525	-2.51596	0.0826069	E
chr4	118686258	118688258	1.27218	2.02583	4.22849	0.00596964	E
chr4	120814769	120816769	1.94942	1.75528	2.73652	0.109873	E
chr4	127344083	127346083	1.38508	-0.433197	-0.391036	0.334268	E
chr4	129230456	129232456	0.324284	0.0663913	1.26417	0.0208739	E
chr4	129372475	129374475	0.647824	0.928383	0.192676	0.48141	E
chr4	132523365	132525365	-0.728636	-1.2715	-1.90748	0.267229	E
chr4	132748747	132750747	-1.56063	-1.63396	-0.505675	0.548898	E
chr4	133955363	133957363	-0.0782275	-0.038949	0.222233	0.869436	E
chr4	134010842	134012842	-0.576727	0.0172374	0.938758	0.0656502	E
chr4	134628164	134630164	0.454162	0.180239	3.06111	0.000147369	E
chr4	135547261	135549261	0.436292	-1.02233	0.747983	0.619894	E
chr4	138703675	138705675	-0.240261	-0.724851	-1.08054	0.895486	E
chr4	141597635	141599635	1.06465	0.0426879	-0.171122	0.241505	E
chr4	143237552	143239552	-0.143885	0.33785	-0.450333	0.904209	E
chr4	145104032	145106032	-1.41022	0.115955	-1.56568	0.36834	E
chr4	145270827	145272827	0.0986818	-0.964045	-1.25713	0.782312	E
chr4	146497405	146499405	0.52574	0.212695	1.38238	0.201281	E
chr4	151998633	152000633	-0.186769	0.172633	1.70921	0.141188	E
chr4	156188305	156190305	1.49327	1.4122	2.64553	0.192647	E
chr4	45287068	45289068	0.313193	-0.933146	-0.443587	0.646719	E
chr4	57690001	57692001	-0.338841	-0.108771	-2.11642	0.0130814	E
chr4	57780105	57782105	0.942604	0.199053	-0.0985955	0.372176	E
chr4	74257157	74259157	0.544993	1.16427	0.51111	0.385255	E
chr4	74258549	74260549	0.243323	0.569507	-0.282837	0.797861	E
chr4	83438323	83440323	-0.506794	-0.426571	1.30811	0.00155255	E
chr4	85232245	85234245	0.196093	-0.164471	0.0569201	0.965053	E
chr4	95684000	95686000	0.0978799	0.0861199	-0.109519	0.99485	E
chr4	105195243	105197243	0.488953	-0.134784	-0.132067	0.919178	E
chr4	105223132	105225132	0.900442	-0.651418	-1.00051	0.196253	E
chr4	105224420	105226420	0.178029	-1.61336	-2.59041	0.089763	E
chr4	116781389	116783389	-0.44509	0.089677	-0.460303	0.813433	E
chr4	118740338	118742338	-0.373535	-0.234828	-0.294529	0.960786	E
chr4	125608589	125610589	0.560334	-0.0265179	0.821016	0.418462	E
chr4	132648444	132650444	0.490029	1.43004	1.04279	0.597035	E
chr4	133039779	133041779	0.971263	1.09536	1.82316	0.036406	E
chr4	133093542	133095542	0.191501	1.03736	0.912406	0.348852	E
chr4	133380015	133382015	1.30761	1.19205	1.42334	0.750352	E
chr4	136145982	136147982	-0.208287	-0.0920923	0.165771	0.941036	E
chr4	136316852	136318852	-0.848113	-1.70392	-3.06996	0.0332384	E
chr4	141165122	141167122	-0.593001	0.515145	0.555899	0.663513	E
chr4	153221781	153223781	0.395675	-0.0321283	0.695584	0.880042	E
chr4	5514680	5516680	0.331279	-0.46285	0.963606	0.643864	E
chr4	8955462	8957462	-1.01601	0.166971	-0.753518	0.828569	E
chr4	10398774	10400774	-0.182129	-0.234942	-0.408059	0.983921	E
chr4	10931474	10933474	0.37508	0.778461	1.3865	0.000315194	E
chr4	11013272	11015272	-0.620919	-0.844145	-0.310763	0.125454	E
chr4	12424635	12426635	-1.42321	-0.861994	0.806092	0.372336	E
chr4	13127351	13129351	-0.94313	-3.34616	-4.88301	0.0154484	E
chr4	13565001	13567001	-0.0420179	-0.484935	-2.16281	0.550022	E
chr4	18394493	18396493	-0.1727	-0.639429	-2.30313	0.559766	E
chr4	21722230	21724230	-0.320038	-0.0857538	-0.0166887	0.940058	E
chr4	22046979	22048979	-0.61641	-0.484953	0.767971	0.833579	E
chr4	24436338	24438338	-0.182226	-0.874547	-2.91019	1.93397e-09	E
chr4	26943846	26945846	-0.376922	-1.13501	0.791777	0.142778	E
chr4	31959230	31961230	0.226883	-0.235286	0.506447	0.292077	E
chr4	33514103	33516103	-0.527155	-0.782335	0.684662	0.599662	E
chr4	33822983	33824983	-0.0619259	0.488818	0.975894	0.56216	E
chr4	33980367	33982367	-0.115557	2.20577	2.20406	0.212499	E
chr4	38370315	38372315	0.776283	-0.317924	1.97566	0.322624	E
chr4	45590821	45592821	0.941917	-0.694642	1.16135	0.516522	E
chr4	47724061	47726061	0.149539	0.00779318	1.22126	0.759299	E
chr4	48578768	48580768	-0.577301	-0.54142	0.587262	0.726116	E
chr4	52659961	52661961	-0.207651	0.0125729	1.43989	0.572171	E
chr4	53338296	53340296	0.616014	0.128211	0.144698	0.915236	E
chr4	53339023	53341023	0.373494	-0.226447	0.312708	0.910723	E
chr4	53951577	53953577	0.354236	-0.114083	0.806002	0.905923	E
chr4	54072153	54074153	0.544795	0.490889	0.434844	0.926655	E
chr4	57919409	57921409	-0.219502	0.23668	-0.353688	0.883295	E
chr4	80873504	80875504	0.048208	0.687261	-0.0289635	0.817592	E
chr4	83327611	83329611	0.295236	0.0318972	-0.354027	0.691962	E
chr4	83329196	83331196	-0.0974922	-0.216935	-0.561642	0.662221	E
chr4	83413397	83415397	0.0403807	0.612395	0.219976	0.56216	E
chr4	84685001	84687001	-0.251013	-1.13104	-2.76718	0.321335	E
chr4	89365130	89367130	0.108713	-0.391423	0.63555	0.789255	E
chr4	91223081	91225081	0.450439	0.787108	1.05487	0.398882	E
chr4	99641069	99643069	-0.31119	-0.523409	-2.23651	1.76905e-05	E
chr4	105459427	105461427	-0.962224	0.110329	-0.903073	0.822329	E
chr4	106858647	106860647	0.153878	0.00484957	0.921281	0.00386816	E
chr4	115557266	115559266	-0.187668	0.449066	-0.677776	0.700437	E
chr4	119025562	119027562	-1.27141	-0.357936	2.39164	4.35821e-16	E
chr4	119086521	119088521	-1.06527	-0.325282	-1.78231	0.576385	E
chr4	124034962	124036962	-0.741823	-0.405512	-0.87684	0.860711	E
chr4	124053448	124055448	-2.2858	0.0630421	-1.64063	0.466201	E
chr4	124359339	124361339	-0.62082	-0.198421	-1.685	0.755774	E
chr4	125728473	125730473	0.785709	0.127254	-0.744794	0.0414039	E
chr4	129749630	129751630	-0.403603	0.340124	-0.0941151	0.806653	E
chr4	130656776	130658776	0.377129	-0.483181	-0.857833	0.421173	E
chr4	131125173	131127173	-1.77937	-1.13667	-3.67039	0.272729	E
chr4	132967707	132969707	0.112201	0.32467	-2.40588	0.173944	E
chr4	133121403	133123403	0.0594219	0.482229	-0.0458518	0.658695	E
chr4	133899575	133901575	-0.270702	-0.866843	0.300771	0.000258629	E
chr4	134729359	134731359	-0.510489	-0.556396	0.141007	0.87846	E
chr4	138410156	138412156	0.250144	0.231933	1.51059	2.6479e-05	E
chr4	138689712	138691712	-0.179056	0.858371	1.83784	0.0638632	E
chr4	138692286	138694286	1.61261	1.69571	2.01613	0.516247	E
chr4	143305274	143307274	0.873595	0.859787	1.2891	0.0100281	E
chr4	148737965	148739965	-0.446741	-0.130427	-1.75514	0.710949	E
chr4	149798054	149800054	0.38713	0.908586	3.62529	7.29228e-10	E
chr4	150259552	150261552	-0.681713	-0.991825	-0.248986	0.504893	E
chr4	154681533	154683533	0.424633	1.75714	-2.10063	0.00173047	E
chr5	25008926	25010926	1.31495	1.55201	2.80537	0.185462	E
chr5	28209198	28211198	0.0102224	0.103231	0.0977626	0.981456	E
chr5	28210744	28212744	0.416561	0.58787	-0.329131	0.147666	E
chr5	38519966	38521966	1.29879	0.501535	0.547889	0.799579	E
chr5	65298776	65300776	0.461005	-0.580676	0.153827	0.469658	E
chr5	65524980	65526980	0.291239	0.21963	1.48602	0.18589	E
chr5	72901495	72903495	-0.816326	0.274318	-0.311376	0.870843	E
chr5	77358839	77360839	-0.150699	-0.782212	0.49434	0.732956	E
chr5	86857201	86859201	0.521221	2.17453	4.43984	3.26334e-05	E
chr5	92111711	92113711	0.0955169	0.316476	-1.52305	0.0471043	E
chr5	108049709	108051709	0.181477	-0.210131	-0.818312	0.701277	E
chr5	108051371	108053371	-0.235048	-0.563767	-1.75165	0.0183975	E
chr5	110803245	110805245	0.236023	-1.03259	0.603966	0.494653	E
chr5	113971916	113973916	-0.632776	0.552568	-0.0554833	0.875729	E
chr5	131490106	131492106	0.451208	-0.0289314	-0.26206	0.947726	E
chr5	135656420	135658420	-0.340302	0.451644	0.964671	0.215085	E
chr5	142545541	142547541	0.472584	0.727253	2.3953	1.66616e-08	E
chr5	19786750	19788750	0.162952	-0.356967	-1.7464	0.58332	E
chr5	22572033	22574033	0.386698	-0.189935	-3.28953	0.0606929	E
chr5	22573474	22575474	0.044775	-0.297451	-3.28042	0.00160938	E
chr5	22574074	22576074	-0.00708695	-0.53467	-2.86452	0.0403822	E
chr5	25535624	25537624	0.816173	0.321376	-0.572854	0.0293711	E
chr5	25670259	25672259	0.334038	0.28657	-0.0209524	0.78483	E
chr5	35769928	35771928	-0.0396684	-0.427925	0.0987484	0.948709	E
chr5	36885538	36887538	-0.372064	-0.64224	1.77718	0.000401747	E
chr5	64116330	64118330	0.915402	1.76901	2.32752	0.441347	E
chr5	64223801	64225801	0.828166	1.54833	1.8218	0.581375	E
chr5	64811197	64813197	1.01376	-1.00747	-0.676618	0.295556	E
chr5	65130012	65132012	-0.892331	-0.755338	-1.64256	0.751748	E
chr5	73418371	73420371	0.314558	-0.331126	-0.661221	0.84126	E
chr5	81555248	81557248	-0.363351	-0.70634	-0.448599	0.571744	E
chr5	88633355	88635355	0.481696	-0.843507	-0.149659	0.803305	E
chr5	99941161	99943161	-1.10525	-1.57194	-1.75154	0.619682	E
chr5	100043145	100045145	-0.761143	-0.140708	-1.09361	0.820342	E
chr5	103723716	103725716	-0.059171	0.0381754	-0.171091	0.982725	E
chr5	104441981	104443981	0.25967	-0.404115	-1.1354	0.57034	E
chr5	105544427	105546427	-1.05038	-1.29423	-0.439409	0.505505	E
chr5	108076107	108078107	0.669971	0.087385	-3.5018	0.0332384	E
chr5	113596169	113598169	0.537429	0.316519	0.33329	0.927198	E
chr5	117395852	117397852	0.313351	0.173713	0.279254	0.966353	E
chr5	127669295	127671295	-2.53517	1.46974	3.40731	0.000248557	E
chr5	127687905	127689905	0.19351	-0.801077	0.477606	0.760823	E
chr5	137933129	137935129	0.736443	1.224	1.46036	0.56216	E
chr5	138089892	138091892	-0.28384	-0.549314	-4.07702	0.0408876	E
chr5	142439471	142441471	0.519959	0.0158637	1.72309	0.0617358	E
chr5	149549890	149551890	-0.955932	-0.508835	-1.82285	0.292077	E
chr5	3332129	3334129	0.529125	1.42211	1.32371	0.756685	E
chr5	13981606	13983606	0.246892	0.205041	-1.39604	0.0027999	E
chr5	13982853	13984853	0.500998	0.440176	-1.0112	0.0981126	E
chr5	16967967	16969967	0.395876	0.0667888	1.11668	0.285473	E
chr5	18564356	18566356	0.0423604	-0.000196872	1.65263	0.0630195	E
chr5	18687686	18689686	0.371603	0.744947	1.47007	0.765079	E
chr5	20973060	20975060	-0.650499	0.635743	0.458237	0.764801	E
chr5	25553867	25555867	-0.101552	-0.521931	-0.737286	0.615124	E
chr5	25675340	25677340	0.15309	-0.0351563	0.744939	0.285473	E
chr5	26691249	26693249	-0.395012	1.07781	0.946942	0.572171	E
chr5	33510928	33512928	1.277	0.855101	-0.29801	3.0337e-05	E
chr5	43859756	43861756	-0.256899	0.537934	0.70307	0.896283	E
chr5	53670631	53672631	0.0219293	0.515956	1.14499	0.178342	E
chr5	64499549	64501549	1.21151	-0.0778396	-0.458199	0.107939	E
chr5	65723810	65725810	-0.269249	-0.00868207	0.308208	0.845779	E
chr5	73367050	73369050	0.816831	0.194284	-1.1584	0.175137	E
chr5	73691289	73693289	0.428549	-0.693064	-0.93525	0.77566	E
chr5	75537277	75539277	0.854183	0.13114	0.550787	0.845563	E
chr5	76368608	76370608	0.176342	0.09097	0.973298	0.651838	E
chr5	77253567	77255567	-0.393912	-0.593655	-1.50763	0.613894	E
chr5	85173148	85175148	-0.299703	-1.20174	1.1612	0.436766	E
chr5	92985988	92987988	-0.808351	0.869777	0.172176	0.591433	E
chr5	109717468	109719468	1.63195	1.50292	2.80296	0.223093	E
chr5	109868316	109870316	0.111561	0.74028	0.597375	0.378208	E
chr5	110468554	110470554	-0.0689453	-0.095951	0.728781	0.318926	E
chr5	114513111	114515111	-0.436911	1.16018	-1.23094	0.272952	E
chr5	114515247	114517247	0.231703	0.67495	0.0658548	0.847763	E
chr5	114541032	114543032	3.46745	3.1164	3.19925	0.269329	E
chr5	122147337	122149337	-0.202795	-0.149419	0.735137	0.576385	E
chr5	122189614	122191614	0.159483	0.0809033	0.355388	0.870843	E
chr5	122190630	122192630	0.24632	0.120238	0.278706	0.912463	E
chr5	122273907	122275907	-0.344547	-0.250937	0.104977	0.895865	E
chr5	124922125	124924125	0.400967	0.478077	1.68675	0.0917785	E
chr5	129269215	129271215	-0.140761	-0.201516	1.945	0.00160938	E
chr5	129281333	129283333	0.251436	0.452908	0.548931	0.966353	E
chr5	133743297	133745297	0.37036	0.811049	0.455967	0.939711	E
chr5	134339402	134341402	0.555358	2.25182	2.34109	0.00790399	E
chr5	134835706	134837706	0.487949	1.67309	2.85063	0.00335745	E
chr5	134969777	134971777	-0.206423	0.354121	0.332061	0.841435	E
chr5	136581313	136583313	1.30838	1.41837	1.77242	0.371689	E
chr5	142351478	142353478	-0.970019	0.512609	1.16551	0.186473	E
chr5	143121905	143123905	0.215034	0.561977	1.03999	0.797861	E
chr5	144085656	144087656	0.0912529	1.71448	0.918955	0.223093	E
chr5	144505378	144507378	-0.980594	-0.99764	-1.68615	0.355188	E
chr5	147154589	147156589	0.0319598	0.255135	-1.66057	3.09729e-07	E
chr5	147760831	147762831	-0.545653	0.270068	1.77816	0.00655502	E
chr5	148701086	148703086	0.257062	1.63597	1.72181	0.152246	E
chr5	149963781	149965781	-1.49823	-1.78987	-0.523194	0.570179	E
chr6	4737925	4739925	-0.0237414	0.0858468	-1.53092	0.73528	E
chr6	4738937	4740937	0.157254	0.791377	-1.39038	0.441347	E
chr6	22346351	22348351	2.07079	2.77289	2.37094	0.125438	E
chr6	37336003	37338003	-0.111459	-0.386381	-0.457605	0.960959	E
chr6	38357900	38359900	0.188714	-0.271942	-2.0634	0.00401239	E
chr6	49098198	49100198	-0.582609	0.48691	2.31315	2.2777e-06	E
chr6	52005482	52007482	0.866093	0.0161279	-0.857672	0.696623	E
chr6	54963898	54965898	-0.178538	0.0672117	0.0817524	0.960959	E
chr6	60363123	60365123	0.0629005	-0.0798975	2.23195	0.00503468	E
chr6	68851979	68853979	-0.672379	-0.445951	0.308232	0.611943	E
chr6	72676728	72678728	-0.359176	0.208952	1.99604	0.0570887	E
chr6	82612471	82614471	-1.01695	-1.76301	-2.12674	0.173944	E
chr6	94619483	94621483	-0.240584	-0.0755783	-0.242174	0.994646	E
chr6	97101197	97103197	1.68176	1.65052	2.43338	0.175137	E
chr6	97277377	97279377	-1.67268	-1.52632	1.25914	0.0601369	E
chr6	99028690	99030690	-0.0168973	0.120564	-0.552637	0.399675	E
chr6	113367275	113369275	-1.0308	-0.476218	-1.10433	0.777786	E
chr6	124803681	124805681	-0.134254	-0.593348	-1.24713	0.10624	E
chr6	128281375	128283375	-1.33014	-1.14347	-0.712527	0.662221	E
chr6	137541792	137543792	-0.261286	0.452229	-1.85987	0.484826	E
chr6	143019957	143021957	-0.435749	-1.42222	-1.94914	0.0060085	E
chr6	5018448	5020448	-0.290287	0.00380632	-2.91336	0.183697	E
chr6	8955999	8957999	0.540059	-1.02632	-0.401267	0.83034	E
chr6	34186728	34188728	-0.188854	0.622046	-0.0407244	0.842897	E
chr6	35235347	35237347	-1.09721	0.38507	-1.50867	0.490459	E
chr6	51543423	51545423	-2.35334	-0.592593	0.259189	0.00366803	E
chr6	54095821	54097821	-0.61532	-0.0644654	-0.0916033	0.950197	E
chr6	54851982	54853982	-0.120614	0.545459	-4.61592	0.0128694	E
chr6	54854044	54856044	-0.948766	-0.850085	-3.18604	0.0469781	E
chr6	60993314	60995314	-1.16185	-0.467581	-0.752269	0.794781	E
chr6	61430461	61432461	-0.212686	-0.106265	-2.48449	0.459995	E
chr6	64651392	64653392	-0.0587393	-0.576974	-1.80388	0.319288	E
chr6	65060162	65062162	1.55734	0.755189	0.642167	0.540892	E
chr6	65795521	65797521	-0.164462	-1.03026	0.271816	0.708013	E
chr6	65796530	65798530	-1.09479	-1.55038	0.272369	0.459995	E
chr6	67167754	67169754	-0.0087843	1.40249	-0.300617	0.397353	E
chr6	70963291	70965291	-0.37353	-0.580995	-1.16757	0.209767	E
chr6	84044023	84046023	-1.4327	-0.925311	0.241275	0.167239	E
chr6	108070157	108072157	-0.63874	-0.721552	0.341366	0.833526	E
chr6	108666785	108668785	0.17292	-0.202385	1.17786	0.429038	E
chr6	117880461	117882461	-0.534121	0.539076	-0.262343	0.318513	E
chr6	125591121	125593121	0.230312	-0.147842	0.311949	0.941036	E
chr6	128460022	128462022	-1.21071	-1.42817	-1.74002	0.61916	E
chr6	140602400	140604400	0.323135	-0.0241619	-2.69105	0.0363071	E
chr6	140604883	140606883	0.561811	1.0202	-0.303081	0.638391	E
chr6	148955016	148957016	-0.0034605	0.284152	-0.811452	0.0688018	E
chr6	148956319	148958319	-0.318997	-0.0609572	-1.00638	0.398882	E
chr6	7706008	7708008	0.301817	0.373225	-0.512925	0.767912	E
chr6	7711980	7713980	0.1411	0.730889	0.0329896	0.79697	E
chr6	12876043	12878043	0.53621	0.0648136	1.49642	0.486428	E
chr6	13747287	13749287	0.89386	1.03802	-1.137	0.48012	E
chr6	17629311	17631311	-0.819413	0.805709	1.06403	0.320727	E
chr6	20686324	20688324	-0.311161	1.19339	1.52734	0.0763361	E
chr6	29630991	29632991	0.951866	0.755246	1.96981	0.0864503	E
chr6	29631953	29633953	0.0990264	-0.125991	1.08001	0.310922	E
chr6	30027607	30029607	0.784957	0.0777502	-1.07023	0.00409992	E
chr6	32705689	32707689	0.722602	-0.102971	0.122523	0.925908	E
chr6	34343406	34345406	-0.500175	-0.141547	-2.05063	0.208549	E
chr6	35353935	35355935	-0.252467	0.074325	0.89757	0.526751	E
chr6	37657325	37659325	0.130075	1.28348	0.994446	0.506451	E
chr6	37728325	37730325	-0.258866	-0.230061	1.04083	0.0826069	E
chr6	37824946	37826946	-0.214873	-0.0185885	-2.77206	0.123751	E
chr6	47601039	47603039	-0.304837	-0.595561	1.37422	0.000295235	E
chr6	47607535	47609535	-0.574555	-1.04883	-0.349998	0.341125	E
chr6	49272095	49274095	0.248592	0.00457104	-0.58628	0.924658	E
chr6	52077942	52079942	0.819924	0.864952	-1.28976	2.41434e-10	E
chr6	53200489	53202489	-0.557338	0.165566	-0.88918	0.705772	E
chr6	55791175	55793175	-0.20182	0.415375	-0.694521	0.751748	E
chr6	60408248	60410248	-0.428842	0.256536	0.164711	0.838676	E
chr6	60409471	60411471	-0.561164	0.584112	0.285929	0.330308	E
chr6	70980222	70982222	0.548778	0.266609	-4.06128	0.0414978	E
chr6	72794119	72796119	-0.138603	-0.308653	-0.446333	0.867233	E
chr6	94754628	94756628	0.940868	0.836447	0.82823	0.903514	E
chr6	100334801	100336801	-0.82498	-0.222292	-0.719571	0.164006	E
chr6	100377272	100379272	-0.556572	-0.0688936	-0.689391	0.581685	E
chr6	100419276	100421276	0.703747	1.38877	-0.706348	0.0663775	E
chr6	100421205	100423205	0.410379	0.626543	-0.587117	0.469092	E
chr6	102736357	102738357	-0.828975	-0.184417	0.560478	0.133401	E
chr6	115682423	115684423	0.0826372	-0.100728	-0.164508	0.974585	E
chr6	115684596	115686596	0.101325	-0.156521	-0.184704	0.81559	E
chr6	120063905	120065905	0.219337	1.03218	1.60536	0.542585	E
chr6	120306293	120308293	0.376867	0.763187	1.26279	0.73852	E
chr6	122365498	122367498	0.0075414	-0.131435	-1.31332	1.91694e-05	E
chr6	125410628	125412628	-0.412923	-0.394484	-0.854392	0.543562	E
chr6	127336012	127338012	0.559971	0.353625	0.0592095	0.951348	E
chr6	133986348	133988348	0.358966	-0.4291	-3.14105	0.0894751	E
chr6	135037969	135039969	1.09003	1.53841	0.543169	0.782312	E
chr6	135039442	135041442	0.508184	0.724914	0.583603	0.877762	E
chr6	135041218	135043218	-0.520893	-0.750511	-0.339057	0.895486	E
chr6	137668523	137670523	0.388269	0.833411	-0.256417	0.77566	E
chr6	137668974	137670974	0.165193	0.777851	-0.41725	0.76437	E
chr6	140335853	140337853	-0.685	-0.133201	-0.834024	0.786926	E
chr6	140607854	140609854	0.369036	-0.210774	0.162124	0.836068	E
chr6	145083907	145085907	0.479576	0.0440435	0.44991	0.905923	E
chr7	16364289	16366289	-0.35653	-0.109952	0.135569	0.966684	E
chr7	19571965	19573965	0.360787	-1.59246	1.85368	0.0265934	E
chr7	27308108	27310108	-0.691108	-1.28489	-0.0995482	0.0332384	E
chr7	28968747	28970747	0.0783208	0.00659531	-1.39025	0.465164	E
chr7	29943371	29945371	-0.421053	-0.364935	-0.427208	0.870843	E
chr7	30843931	30845931	0.817146	0.155712	2.61309	6.32661e-07	E
chr7	35529715	35531715	-0.546713	0.144693	0.0588453	0.802392	E
chr7	44374417	44376417	0.0609567	-0.258495	0.0538805	0.875729	E
chr7	65453399	65455399	0.361215	0.291393	1.65748	0.271608	E
chr7	80745015	80747015	-1.36496	0.48779	0.0818884	0.396777	E
chr7	80778428	80780428	0.117063	-0.0550948	0.16569	0.974332	E
chr7	81479978	81481978	0.451175	0.421616	1.17823	0.159192	E
chr7	82841723	82843723	-0.022856	0.219339	0.431561	0.984645	E
chr7	86343476	86345476	0.149813	0.764142	0.871934	0.451367	E
chr7	89974677	89976677	-1.83367	-0.280203	-1.59168	0.543287	E
chr7	115865224	115867224	-0.359683	0.22892	-1.74286	0.5348	E
chr7	115867404	115869404	0.20131	0.455943	-3.95694	0.0902857	E
chr7	126217490	126219490	0.83071	1.37446	-1.42451	0.371072	E
chr7	126225269	126227269	0.505421	0.430448	-0.870619	0.653086	E
chr7	127224468	127226468	0.456072	-0.219172	-0.393276	0.377987	E
chr7	130860054	130862054	-0.747055	-0.446055	-0.938453	0.835416	E
chr7	131655240	131657240	1.25259	0.315576	-1.69054	0.0894751	E
chr7	3347136	3349136	0.218416	0.0513366	-1.35788	0.002124	E
chr7	6243775	6245775	0.139156	0.18419	-1.69672	0.61215	E
chr7	6257726	6259726	0.181068	0.243083	-0.826061	0.0716424	E
chr7	24086975	24088975	-0.186032	-0.581374	0.297369	0.285553	E
chr7	24516251	24518251	-0.653843	-0.360718	-0.710304	0.847763	E
chr7	24878677	24880677	-0.115777	-0.977446	-0.635602	0.00335745	E
chr7	29292943	29294943	-2.04229	-2.07876	-1.89482	0.135476	E
chr7	29971511	29973511	-0.765211	-1.48605	-0.783222	0.0657592	E
chr7	43166286	43168286	0.259372	-0.494368	-0.923877	0.553216	E
chr7	48917259	48919259	0.119856	1.24554	0.23079	0.44949	E
chr7	49447763	49449763	-0.438648	-0.19616	-1.38578	0.553216	E
chr7	57639900	57641900	-0.0197677	-0.360106	-1.12732	0.895486	E
chr7	65872671	65874671	0.104272	-0.282115	-0.623537	0.942624	E
chr7	73398925	73400925	-0.585533	-0.625928	-0.268065	0.927198	E
chr7	78797862	78799862	-0.609235	0.0136218	-0.302298	0.942624	E
chr7	81062511	81064511	-0.512877	-0.45717	-0.464037	0.862602	E
chr7	81140819	81142819	-0.686127	-1.14144	-1.05118	0.062774	E
chr7	90538799	90540799	0.487944	-0.516513	-4.36993	0.064741	E
chr7	97340504	97342504	-0.269224	-0.210137	-0.736752	0.944396	E
chr7	97802309	97804309	-0.62093	0.675856	0.367383	0.782098	E
chr7	97803719	97805719	0.145741	0.474669	-0.743424	0.87846	E
chr7	112822672	112824672	-0.0911921	-0.00173081	0.341881	0.967184	E
chr7	112841084	112843084	-0.413731	0.66073	-0.132944	0.758684	E
chr7	113261844	113263844	-0.120004	-0.910393	-1.37669	0.00281983	E
chr7	113267556	113269556	0.590424	-2.36934	-2.21212	0.0157247	E
chr7	138849194	138851194	0.0142739	0.215111	-0.726885	0.634048	E
chr7	138855841	138857841	-0.161836	-0.690461	-0.615104	0.935319	E
chr7	139914812	139916812	0.544367	0.238927	0.282797	0.983945	E
chr7	141147866	141149866	1.30232	0.663144	1.45005	0.782312	E
chr7	3578427	3580427	0.1054	-0.0861098	0.192347	0.841093	E
chr7	18754249	18756249	-0.50788	0.367461	2.54526	2.88105e-12	E
chr7	24808314	24810314	-1.58911	-0.238126	-1.373	0.475704	E
chr7	25187277	25189277	0.717234	0.461916	-0.500198	0.679649	E
chr7	25263091	25265091	0.408593	0.400451	-0.449648	0.353401	E
chr7	35322084	35324084	-0.472344	0.188009	0.552761	0.471775	E
chr7	41511806	41513806	-1.60932	0.488577	1.04515	0.297663	E
chr7	41581325	41583325	0.332281	0.539753	0.714563	0.937028	E
chr7	44698226	44700226	-0.0101186	-0.280807	-0.603649	0.948156	E
chr7	58223947	58225947	0.175585	-0.288364	-0.333547	0.903723	E
chr7	58224847	58226847	0.120438	-0.353265	-0.509403	0.886107	E
chr7	70788209	70790209	-0.952818	-0.564673	0.0999956	0.645676	E
chr7	72325214	72327214	0.0975399	-0.349093	-1.83382	0.237748	E
chr7	73140415	73142415	2.12685	1.36828	-0.845448	0.207762	E
chr7	73602032	73604032	-0.312999	0.132834	0.487774	0.836068	E
chr7	75800835	75802835	0.930439	0.996924	0.906345	0.662221	E
chr7	79653883	79655883	0.315327	-0.276032	-1.61404	0.0021773	E
chr7	80843102	80845102	-0.156137	0.155403	0.26378	0.877762	E
chr7	80962001	80964001	-0.138562	-0.0482557	-2.0796	0.510516	E
chr7	81182285	81184285	0.644543	-0.0479625	-2.61788	0.00549333	E
chr7	87095648	87097648	0.802243	1.03023	2.93665	0.0155919	E
chr7	96151911	96153911	-0.737653	-0.298885	0.0706467	0.935319	E
chr7	97756778	97758778	-0.503566	0.0318941	0.122241	0.818891	E
chr7	100699123	100701123	-0.868846	-1.5062	-2.8973	0.142447	E
chr7	107236012	107238012	0.356364	0.107325	-0.379715	0.2834	E
chr7	107338684	107340684	-0.125113	-0.544653	-0.00603421	0.913162	E
chr7	108195530	108197530	-1.92933	-0.34814	2.0299	0.00994189	E
chr7	109880737	109882737	0.260629	0.542424	0.962854	0.893803	E
chr7	110165407	110167407	-0.0684401	-0.219124	0.386544	0.333287	E
chr7	110745654	110747654	-1.00195	-1.04897	-3.01272	0.00126792	E
chr7	113047645	113049645	-0.884166	0.0409235	-1.39108	0.298235	E
chr7	121627285	121629285	1.37665	0.817234	1.79313	0.576385	E
chr7	122278751	122280751	-1.10639	-1.36729	-1.36504	0.697892	E
chr7	122939538	122941538	-1.69407	0.769072	0.583081	0.370239	E
chr7	140959357	140961357	0.318097	0.154506	-0.762243	0.430712	E
chr7	140961851	140963851	-0.612402	-0.766946	-1.03337	0.258941	E
chr7	141024059	141026059	-0.263422	0.420981	-0.716711	0.435287	E
chr7	145138335	145140335	-0.452411	0.626663	0.931962	0.359327	E
chr8	10665169	10667169	-0.231096	-0.598752	0.618011	0.298954	E
chr8	10924111	10926111	-0.695583	-0.525951	1.2596	1.88262e-07	E
chr8	11649313	11651313	1.46203	0.895882	1.99493	0.283685	E
chr8	11703987	11705987	-0.783083	-0.914177	-4.30254	0.0476573	E
chr8	26059649	26061649	0.168647	1.92855	1.13561	0.214417	E
chr8	45232431	45234431	0.295114	-1.81161	-2.15579	0.00130593	E
chr8	47338071	47340071	0.255443	1.02541	1.05806	0.574497	E
chr8	72333166	72335166	-0.0631762	-0.199585	-1.039	0.760164	E
chr8	72554933	72556933	0.823576	-0.0854816	2.26512	0.00026009	E
chr8	72560265	72562265	-0.516857	-0.900986	0.584339	0.148369	E
chr8	83154319	83156319	-0.375303	-0.537449	-1.5795	0.8205	E
chr8	83159362	83161362	-0.0508295	0.814873	-0.879037	0.532016	E
chr8	90669730	90671730	-1.21545	-0.47368	-0.727534	0.8639	E
chr8	111764844	111766844	0.166959	0.0559289	-1.22196	0.841208	E
chr8	111788588	111790588	-0.00439756	-0.0934996	-1.51961	0.204862	E
chr8	116673137	116675137	0.742113	0.377571	-0.0884932	0.878162	E
chr8	3414023	3416023	0.257582	-0.916527	-0.38835	0.658708	E
chr8	3415973	3417973	-1.11044	0.141931	0.143226	0.297424	E
chr8	3545639	3547639	1.16493	1.36736	2.47242	0.0894751	E
chr8	3551437	3553437	1.17721	0.912338	1.62675	0.398882	E
chr8	18805345	18807345	0.65983	1.4938	-0.52177	0.520598	E
chr8	36147952	36149952	-0.502533	-0.668845	-2.27069	0.486158	E
chr8	44978560	44980560	-0.850183	-0.905661	-0.970363	0.66834	E
chr8	69120588	69122588	0.362498	0.127822	1.00037	0.57034	E
chr8	69846323	69848323	-0.713014	-0.519109	-0.906957	0.887784	E
chr8	70273392	70275392	0.0345128	0.352744	-0.0129717	0.948722	E
chr8	78555959	78557959	0.523051	0.940678	-1.97833	0.339629	E
chr8	85440881	85442881	-0.316523	0.706075	0.158992	0.799664	E
chr8	85497823	85499823	0.402308	0.297815	-0.29072	0.960504	E
chr8	90880740	90882740	0.69836	0.344745	-0.095686	0.922304	E
chr8	105230677	105232677	-1.27801	-0.582245	-0.884275	0.788825	E
chr8	105231081	105233081	-0.788022	-0.843015	-0.831703	0.875729	E
chr8	106515270	106517270	-2.67566	-0.524687	1.52248	0.0864503	E
chr8	106598812	106600812	0.494439	0.0289091	1.029	0.465481	E
chr8	106616072	106618072	0.0440793	0.283491	1.01653	0.0515164	E
chr8	106962501	106964501	-0.189343	0.568529	-0.0658702	0.893296	E
chr8	108722028	108724028	1.02531	-0.196742	-0.186983	0.00151655	E
chr8	108725950	108727950	-0.413947	-0.039972	-1.5564	0.751748	E
chr8	108728370	108730370	-0.278703	0.28973	-0.731588	0.903914	E
chr8	111649816	111651816	-1.96915	0.765716	-0.153077	0.471744	E
chr8	120333841	120335841	0.211898	-0.0840594	0.041853	0.985364	E
chr8	4435716	4437716	1.00576	2.88262	3.46372	0.00483977	E
chr8	4585612	4587612	-2.04661	0.602818	2.13285	0.0195309	E
chr8	4933380	4935380	-0.537106	-0.614768	-1.53556	0.835356	E
chr8	12481084	12483084	0.559599	0.26061	-0.958712	0.312277	E
chr8	12544642	12546642	0.81833	0.950613	0.399496	0.487613	E
chr8	12547209	12549209	1.16976	0.277736	-0.364847	0.63273	E
chr8	14013878	14015878	0.0372564	0.0375995	0.636046	0.757109	E
chr8	33442858	33444858	1.88552	1.75199	1.70281	0.414116	E
chr8	33965648	33967648	0.38147	-0.580589	-1.2086	4.35295e-05	E
chr8	34078668	34080668	-1.15795	-0.258691	-0.368437	0.30723	E
chr8	48178210	48180210	0.709773	0.218719	1.34019	0.425177	E
chr8	56251674	56253674	-0.152897	0.419652	0.163895	0.948709	E
chr8	64365916	64367916	1.33255	0.672973	-1.08925	0.432724	E
chr8	65045654	65047654	-0.0831999	0.0735216	0.959834	0.583209	E
chr8	65047008	65049008	-0.586948	0.052327	0.8596	0.56216	E
chr8	65061292	65063292	0.158879	-0.129242	-0.705529	0.940087	E
chr8	65063319	65065319	-0.18573	-0.654937	0.799164	0.653086	E
chr8	65067186	65069186	-0.408641	-0.511604	0.57806	0.800212	E
chr8	72270543	72272543	0.878284	0.109335	0.0867841	0.718738	E
chr8	72552113	72554113	0.349951	0.403761	1.47221	0.000693812	E
chr8	75194002	75196002	0.298423	0.243082	2.22311	0.000453089	E
chr8	78067499	78069499	-1.12491	-0.401204	1.70711	0.0028065	E
chr8	78097152	78099152	-0.595539	-0.688025	0.582798	0.147666	E
chr8	78492230	78494230	-0.90089	-1.38782	-1.00885	0.702169	E
chr8	85589501	85591501	-0.517829	0.505805	0.588303	0.450021	E
chr8	85594363	85596363	-0.716458	-0.450358	0.556637	0.260882	E
chr8	88952423	88954423	0.0805651	-0.0335061	-1.52552	0.285473	E
chr8	89822724	89824724	-1.06968	0.55037	-1.33945	0.532322	E
chr8	92133319	92135319	0.0943266	0.222006	-0.0549827	0.948709	E
chr8	92771032	92773032	1.85016	2.31651	2.60465	0.245722	E
chr8	98376922	98378922	0.564167	0.270436	-1.09528	0.751748	E
chr8	106450470	106452470	-0.475013	-0.681372	0.80422	0.434194	E
chr8	107109778	107111778	-1.08856	-1.05935	-0.474598	0.822329	E
chr8	112032248	112034248	-0.94502	0.671148	-0.188908	0.312412	E
chr8	117492671	117494671	-0.167332	-1.5235	-0.423101	0.709001	E
chr8	125698587	125700587	0.297948	-0.186366	0.274289	0.974585	E
chr8	125699715	125701715	0.970537	-0.0672995	1.07298	0.730701	E
chr9	21767574	21769574	-0.66973	-0.670145	-0.551449	0.824185	E
chr9	31009340	31011340	0.295559	-0.536277	-0.992908	0.817592	E
chr9	31017913	31019913	-1.46833	-0.956367	-0.438119	0.501359	E
chr9	31118905	31120905	-1.31605	-0.0203396	1.13309	0.309906	E
chr9	36802289	36804289	-0.360995	-0.742455	-1.54735	0.00412503	E
chr9	40396994	40398994	0.876086	0.250175	-1.62788	0.203613	E
chr9	42178158	42180158	-0.996983	-0.161887	-1.51832	0.448366	E
chr9	42857349	42859349	-2.3756	-0.443043	-0.660832	0.631941	E
chr9	49750635	49752635	0.30784	0.109754	0.517726	0.974332	E
chr9	50981024	50983024	-1.48876	-0.827658	-2.87164	0.377987	E
chr9	58966609	58968609	0.63592	0.495745	-2.43023	0.207605	E
chr9	71492948	71494948	-0.603184	-0.153048	-0.640274	0.828302	E
chr9	76313022	76315022	-0.0168333	-0.438905	-3.98392	0.00349262	E
chr9	103503796	103505796	-0.561629	-1.29189	-1.72306	0.239584	E
chr9	114583484	114585484	-0.364638	-0.530572	-0.413988	0.678929	E
chr9	3870369	3872369	-0.358424	-0.79383	1.731	0.0294087	E
chr9	3871264	3873264	-0.424632	-1.79556	1.68717	0.00805854	E
chr9	7795464	7797464	0.0458372	0.235707	0.353669	0.757109	E
chr9	9268359	9270359	-0.213454	0.265679	0.574842	0.435536	E
chr9	13698619	13700619	-1.06885	-0.950886	-0.523447	0.377987	E
chr9	40205627	40207627	1.05563	0.642708	0.469669	0.226911	E
chr9	40767176	40769176	0.378246	0.126269	0.114512	0.922478	E
chr9	45348827	45350827	-2.07356	-1.25513	-0.936571	0.543562	E
chr9	57509768	57511768	-1.99212	-0.174314	1.62573	0.00765354	E
chr9	65592860	65594860	0.0512786	0.8845	0.120513	0.817429	E
chr9	65634997	65636997	0.263806	0.623188	-0.11059	0.862602	E
chr9	65640330	65642330	-0.237504	-0.0251874	0.0454681	0.981576	E
chr9	72811690	72813690	0.901328	0.562336	0.425973	0.927198	E
chr9	78189946	78191946	-0.0112674	-0.516061	-0.584422	0.662221	E
chr9	88331777	88333777	-0.948691	-1.06447	-1.22839	0.755656	E
chr9	90124529	90126529	-0.385362	-0.630143	-1.12226	0.209767	E
chr9	96229423	96231423	-1.28513	-0.580074	-2.00174	0.0981126	E
chr9	100639865	100641865	-0.0929378	0.0595125	1.01869	0.0205555	E
chr9	100962598	100964598	-0.291588	0.081	-0.12042	0.944834	E
chr9	102999482	103001482	-0.0423447	-0.475078	0.321745	0.841093	E
chr9	106210386	106212386	-1.05823	-0.0538852	-1.01182	0.372176	E
chr9	118862686	118864686	0.367973	0.356444	-0.592225	0.895865	E
chr9	8769176	8771176	1.46855	1.98429	4.04722	0.000541998	E
chr9	14173219	14175219	-0.851423	-0.619765	0.138406	0.84126	E
chr9	18721555	18723555	0.274372	-0.183876	0.576733	0.924824	E
chr9	31687631	31689631	0.427023	0.250466	-0.359383	0.942624	E
chr9	32094739	32096739	0.727637	0.892311	1.01689	0.0614204	E
chr9	37484472	37486472	-0.185409	-0.761109	-0.950194	0.181702	E
chr9	40236763	40238763	0.547176	0.366532	-0.223348	0.215784	E
chr9	40238997	40240997	0.556777	0.248329	-0.154998	0.0027999	E
chr9	40239984	40241984	0.519658	0.178336	-0.237239	0.216948	E
chr9	49935072	49937072	0.305811	0.389986	0.546334	0.935319	E
chr9	50123449	50125449	-0.586337	-0.362797	0.614864	0.387829	E
chr9	54802158	54804158	0.149462	-0.988285	-0.00929853	0.204862	E
chr9	54839321	54841321	-1.31621	-0.954773	-0.511504	0.597711	E
chr9	54855406	54857406	0.241298	0.598243	-0.10273	0.907059	E
chr9	56072174	56074174	-0.672733	0.332738	0.597962	0.442563	E
chr9	57162191	57164191	-0.287709	-0.336907	0.491065	0.926541	E
chr9	57902148	57904148	-0.181205	-0.119223	0.0328596	0.984455	E
chr9	61667007	61669007	-0.556871	-1.10338	-0.3933	0.693472	E
chr9	64266420	64268420	-0.00174727	-0.191239	0.301096	0.717565	E
chr9	64360785	64362785	-0.72641	-1.1242	-1.83645	0.149665	E
chr9	65618490	65620490	-1.19266	-1.00905	-2.08689	0.0235551	E
chr9	72657038	72659038	0.0183596	0.812885	-0.41749	0.654409	E
chr9	72778992	72780992	0.300658	0.0281805	1.16308	0.235976	E
chr9	77616029	77618029	-1.29365	-0.502232	-2.17841	0.164102	E
chr9	84252616	84254616	-1.10242	-0.431784	-0.837927	0.890576	E
chr9	99151824	99153824	0.298518	-0.104852	-1.47457	0.667688	E
chr9	99152914	99154914	-0.367689	-0.0956755	-2.01319	0.591863	E
chr9	101040870	101042870	-0.139782	0.15383	0.104036	0.985364	E
chr9	113458010	113460010	-0.589367	0.174533	-2.48908	0.025339	E
chr9	115723227	115725227	-1.6215	0.0932284	0.49275	0.511507	E
chr9	116426693	116428693	-0.992331	-1.75853	-1.70019	0.00353322	E
chr9	118388967	118390967	-0.75961	-0.943951	0.0604239	0.663513	E
chr9	120732017	120734017	-0.643246	-0.362945	1.03897	0.393018	E
chrX	8182335	8184335	1.00227	0.663331	0.0614825	0.877762	E
chrX	12152326	12154326	-0.121951	-0.338647	0.290829	0.922668	E
chrX	38565834	38567834	-0.188079	-0.500568	0.094237	0.71045	E
chrX	52347920	52349920	1.91801	0.583461	1.39435	0.479303	E
chrX	60168749	60170749	-0.339862	-0.255245	-0.704083	0.960959	E
chrX	101395711	101397711	0.800811	0.959164	-0.0485022	0.407748	E
chrX	104195756	104197756	-0.250816	0.308491	0.507378	0.925908	E
chrX	105923859	105925859	0.220854	-0.492094	-0.0856608	0.939326	E
chrX	134674240	134676240	1.08152	2.00163	2.78164	0.186473	E
chrX	166530983	166532983	0.212081	-0.591683	-0.915647	0.760164	E
chrX	10728612	10730612	0.549386	1.11456	0.295745	0.841093	E
chrX	13046168	13048168	0.110577	0.0326207	-0.109973	0.985364	E
chrX	58039029	58041029	-0.40889	-0.426777	0.00350072	0.597035	E
chrX	58041006	58043006	0.206768	0.321536	-0.968325	0.658708	E
chrX	84442328	84444328	-0.204348	0.155031	1.27157	0.0408876	E
chrX	84443207	84445207	-0.00915058	0.272179	1.56401	0.34025	E
chrX	85076163	85078163	0.535039	0.474906	0.436942	0.854115	E
chrX	85076929	85078929	-0.146733	0.492798	-0.09553	0.847763	E
chrX	93671991	93673991	-0.851014	-1.16097	-2.2618	0.149384	E
chrX	103437223	103439223	-0.199151	-0.125567	0.440418	0.402958	E
chrX	143542460	143544460	0.106324	-0.31355	1.598	0.460458	E
chrX	144334698	144336698	1.77082	1.47454	1.00507	0.691962	E
chrX	144337032	144339032	-0.157838	-0.149324	-0.442114	0.973066	E
chrX	151049070	151051070	-0.146469	-0.766205	-0.0666524	0.791349	E
chrX	153281328	153283328	-0.338731	-1.10522	-2.51976	0.370239	E
chrX	162755208	162757208	-0.395374	-0.313258	-0.997971	0.717963	E
chrX	8218872	8220872	-0.263103	-0.422279	-2.30597	0.0716424	E
chrX	11806479	11808479	1.14272	0.754216	-0.949931	0.44867	E
chrX	11956336	11958336	-0.254237	-0.0570451	0.626605	0.764801	E
chrX	12007205	12009205	-0.430271	-0.157534	-0.232293	0.966353	E
chrX	13013331	13015331	-0.0154412	0.453589	-1.70979	0.104408	E
chrX	17520505	17522505	1.39761	1.29885	2.19865	0.646719	E
chrX	20355423	20357423	0.0254854	0.000907374	1.6202	0.145952	E
chrX	20770747	20772747	0.297391	-0.966548	-0.311985	0.782312	E
chrX	42342799	42344799	0.496322	0.981605	-0.316759	0.398882	E
chrX	42431287	42433287	0.624918	0.599713	-0.107339	0.643525	E
chrX	52631971	52633971	-0.986371	0.0591953	0.356104	0.511507	E
chrX	58013245	58015245	0.0420402	-0.341344	-1.54514	2.87902e-06	E
chrX	94132689	94134689	0.909941	1.01244	2.4223	0.00173263	E
chrX	99555891	99557891	1.12297	-0.0709632	-0.624013	0.187211	E
chrX	103984186	103986186	-0.105512	-0.601199	-1.06009	0.0414978	E
chrX	103985440	103987440	-0.375802	-0.592739	-1.10884	0.038418	E
chrX	103986541	103988541	-0.487032	-0.715384	-1.23809	0.0205929	E
chrX	106986982	106988982	0.865562	1.0135	1.077	0.847763	E
chrX	135925007	135927007	-0.15897	0.434626	-0.460632	0.708013	E
chrX	135972825	135974825	0.597789	0.775012	-0.443986	0.54397	E
chrX	142467278	142469278	-0.0131642	0.419748	1.14335	0.142447	E
chrX	150476917	150478917	1.36529	1.09227	1.41075	0.571744	E
chrX	151123054	151125054	-0.148067	-0.38442	-1.06686	0.903914	E
chrX	153210236	153212236	-0.359109	-0.855201	-1.02561	0.568908	E
