# Supplementary material for: Hijacking of transcriptional condensates by endogenous retroviruses
Source: Research Square preprint supplement (doi:10.21203/rs.3.rs-802409/v1), 2021-09-15
Supplement: Supplementary file 12 [file fbc97e4858d0350da9982c73.xlsx]

## Sheet: scRNA_marker_gene_expression_lo
cell_id
